# Supplementary material for: Toward a sustainable energy future using ammonia as an energy carrier: global supply chain cost and greenhouse gas emissions
Source: Royal Society of Chemistry journal article supplement (doi:10.1039/d5ee05571g), 2025-11-03
Supplement: d5ee05571g2.xlsx [file d5ee05571g2.xlsx]

## Sheet: Read Me
		Supplementary Information for research article, "Toward a Sustainable Energy Future Using Ammonia as an Energy Carrier: Global Supply Chain Cost and Greenhouse Gas Emissions"
				Graphical Abstract
		▣ This Supplementary Information xlsx file supports the research article, "Toward a Sustainable Energy Future Using Ammonia as an Energy Carrier: Global Supply Chain Cost and Greenhouse Gas Emissions,", Energy & Environmental Science. ▣ It provides the complex two-dimensional (2D) background data utilized for the primary calculations, and results data of figures presented in the article and addit…		#VALUE!
		Authors:	Woojae Shina, Haoxiang Laia, Gasim Ibrahima, Guiyan Zanga†.
			a. MIT Energy Initiative, Massachusetts Institute of Technology, 77 Massachusetts Avenue, Cambridge, MA 02139, USA
			† Corresponding author: guiyanza@mit.edu
		Citation:	Shin, W., Lai, H., Ibrahim, G., & Zang, G. (2026). "Toward a Sustainable Energy Future Using Ammonia as an Energy Carrier: Global Supply Chain Cost and Greenhouse Gas Emissions", Energy & Environmental Science.
		Description of Worksheets:
		1. Country Code: full name of 63 countries, ISO country code,
		2. Voyage Distance: voyage distances between countries. The representative port for each country was selected based on one or more of the following criteria, which are detailed in the Supplementary Information document.
		3. Ammonia Supply Chain: Levelized cost of ammonia (LCOA) and GHG emission of global ammonia supply chain. Check Supplementary Information for detail assumption and options chosen.
		* Note: Diagonal values (for both GHG and LCOA) represent scenarios for domestic ammonia production, which is not globally traded.
		4. Hydrogen Supply Chain: Levelized cost of hydrogen (LCOH) and GHG emission of global hydrogen supply chain using ammonia as a carrier. Check Supplementary Information for detail assumption and options chosen.
		* Note: Diagonal values (for both GHG and LCOA) are not applicable, as this study adopts combined ammonia production, rather than stand-alone hydrogen production.
		* Both NH3 and H2 supply chain include production, transporation1, storage&loading, shipping, unloading&storage, transportation2 stages.
		* All transporation1 and transportation2 assume 100km pipeline each, and all storage assumed 5 days storage.

## Sheet: Country Code
	Region	Country name	ISO Country code
	Africa	Algeria	DZ
		Angola	AO
		Egypt	EG
		Equatorial Guinea	GQ
		Libya	LY
		Morocco	MA
		Mozambique	MZ
		Namibia	NA
		Nigeria	NG
		South Africa	ZA
		Tunisia	TN
	Asia-Pacific	Australia	AU
		Brunei	BN
		China	CN
		India	IN
		Indonesia	ID
		Japan	JP
		Kazakhstan	KZ
		Korea	KR
		Malaysia	MY
		Papua New Guinea	PG
		Philippines	PH
		Singapore	SG
		Thailand	TH
		Turkmenistan	TM
		Uzbekistan	UZ
		Vietnam	VN
	Europe	Azerbaijan	AZ
		Belgium	BE
		Czech	CZ
		Denmark	DK
		Finland	FI
		France	FR
		Germany	DE
		Italy	IT
		Netherlands	NL
		Norway	NO
		Poland	PL
		Portugal	PT
		Russia	RU
		Spain	ES
		Sweden	SE
		Turkiye	TR
		Ukraine	UA
		United Kingdom	GB
	Middle East	Iran	IR
		Iraq	IQ
		Israel	IL
		Kuwait	KW
		Oman	OM
		Qatar	QA
		Saudi Arabia	SA
		United Arab Emirates	AE
	North America	Canada	CA
		Mexico	MX
		Trinidad and Tobago	TT
		United States	US
	South America	Argentina	AR
		Bolivia	BO
		Brazil	BR
		Chile	CL
		Peru	PE
		Venezuela	VE

## Sheet: Voyage Distance
	Voyage distance [nautical miles]		Arrival Country	Algeria	Angola	Egypt	Equatorial Guinea	Libya	Morocco	Mozambique	Namibia	Nigeria	South Africa	Tunisia	Australia	Brunei	China	India	Indonesia	Japan	Kazakhstan	Korea	Malaysia	Papua New Guinea	Philippines	Singapore	Thailand	Turkmenistan	Uzbekistan	Vietnam	Azerbaijan	Belgium	Czech	Denmark	Finland	France	Germany	Italy	Netherlands	Norway	Poland	Portugal	Russia	Spain	Sweden	Turkiye	Ukraine	United Kingdom	Iran
			ISO Country Code	DZ	AO	EG	GQ	LY	MA	MZ	NA	NG	ZA	TN	AU	BN	CN	IN	ID	JP	KZ	KR	MY	PG	PH	SG	TH	TM	UZ	VN	AZ	BE	CZ	DK	FI	FR	DE	IT	NL	NO	PL	PT	RU	ES	SE	TR	UA	GB	IR
	Departure Country	ISO Country Code	Port	Oran	Cabinda	Port Said	Punta Europa Terminal	Marsa El Brega	Casablanca	Pemba	Walvis Bay	Bonny Inshore Terminal	Durban	Gabes	Darwin	Seria	Guangzhou	Kandla	Balikpapan	Tokyo	#N/A	Busan	Kuching	Port Moresby	Batangas	Jurong	Sattahip	#N/A	#N/A	Ho Chi Minh City	#N/A	Zeebrugge	#N/A	Fredericia	Pori	Dunkirk	Wilhelmshaven	Porto San Leonardo	Rotterdam	Heroya	Swinoujscie	Setubal	Vladivostok	Barcelona	Nynashamn	Izmir	Odessa	Milford haven	Bandar Mahshahr
	Algeria	DZ	Oran		3978	1699	3639	1166	422	5094	4700	3544	6108	821	8441	7374	8256	4655	7728	9617		9216	7156	9441	8057	6705	7467			7359		1530		2165	2714	1497	1793	1452	1596	2049	2273	519	9720	362	2497	1427	1922	1344	5027
	Angola	AO	Cabinda	3978		5656	640	5124	3574	3731	1078	685	2555	4778	7892	7760	8755	6465	7692	10118		9723	7511	8941	8444	7358	8097			7916		4758		5393	5942	4725	5021	5407	4824	5277	5501	3798	10223	4258	5725	5384	5885	4572	6946
	Egypt	EG	Port Said	1699	5656		5317	767	2100	3395	6040	5222	4556	1140	6742	5675	6557	2956	6029	7918		7517	5457	7742	6358	5006	5768			5660		3208		3843	4392	3175	3471	1311	3274	3727	3951	2197	8021	1588	4175	598	1128	3022	3328
	Equatorial Guinea	GQ	Punta Europa Terminal	3639	640	5317		4785	3224	4325	1675	126	3149	4439	8486	8354	9349	7059	8286	10712		10317	8105	9535	9038	7952	8691			8510		4415		5050	5599	4382	4678	5068	4481	4934	5158	3456	10817	3919	5382	5045	5546	4229	7540
	Libya	LY	Marsa El Brega	1166	5124	767	4785		1568	4162	5846	4690	5323	530	7509	6442	7324	3723	6796	8685		8284	6224	8509	7125	5773	6535			6427		2676		3311	3860	2643	2939	1014	2742	3195	3419	1665	8788	1056	3643	664	1158	2490	4095
	Morocco	MA	Casablanca	422	3574	2100	3224	1568		5495	4295	3136	5694	1222	8842	7775	8657	5056	8129	10018		9617	7557	9842	8458	7106	7868			7760		1320		1955	2504	1287	1583	1851	1386	1839	2063	313	10121	702	2287	1828	2329	1134	5428
	Mozambique	MZ	Pemba	5094	3731	3395	4325	4162	5495		2670	4365	1186	4535	5296	4726	5608	2789	4711	6969		6568	4508	6324	5409	4057	4819			4711		6603		7238	7787	6570	6866	4706	6669	7122	7346	5592	7072	4983	7570	3993	4523	6417	3249
	Namibia	NA	Walvis Bay	4700	1078	6040	1675	5846	4295	2670		1713	1494	5500	6831	6699	7694	5404	6631	9057		8662	6450	7880	7383	6297	7036			6855		5479		6114	6663	5446	5742	6129	5545	5998	6222	4518	9162	4980	6446	6106	6607	5293	5885
	Nigeria	NG	Bonny Inshore Terminal	3544	685	5222	126	4690	3136	4365	1713		3189	4344	8526	8394	9389	7099	8326	10752		10357	8145	9575	9078	7992	8731			8550		4320		4955	5504	4287	4583	4973	4386	4839	5063	3361	10857	3824	5287	4950	5451	4134	7580
	South Africa	ZA	Durban	6108	2555	4556	3149	5323	5694	1186	1494	3189		5696	5558	5321	6316	3920	5253	7679		7284	5072	6607	6005	4859	5621			5477		6878		7513	8062	6845	7141	5867	6944	7397	7621	5917	7784	6144	7845	5154	5684	6692	4401
	Tunisia	TN	Gabes	821	4778	1140	4439	530	1222	4535	5500	4344	5696		7882	6815	7697	4096	7169	9058		8657	6597	8882	7498	6146	6908			6800		2330		2965	3514	2297	2593	985	2396	2849	3073	1319	9161	721	3297	921	1416	2144	4468
	Australia	AU	Darwin	8441	7892	6742	8486	7509	8842	5296	6831	8526	5558	7882		1816	2424	4546	1169	3033		2934	1898	1179	1737	1918	2535			2327		9950		10585	11134	9917	10213	8053	10016	10469	10693	8939	3428	8330	10917	7340	7870	9764	5612
	Brunei	BN	Seria	7374	7760	5675	8354	6442	7775	4726	6699	8394	5321	6815	1816		1242	3462	942	2390		2004	329	2606	729	683	1003			635		8883		9518	10067	8850	9146	6986	8949	9402	9626	7872	2508	7263	9850	6273	6803	8697	4528
	China	CN	Guangzhou	8256	8755	6557	9349	7324	8657	5608	7694	9389	6316	7697	2424	1242		4344	1736	1679		1223	1435	3148	743	1560	1595			1010		9765		10400	10949	9732	10028	7868	9831	10284	10508	8754	1722	8145	10732	7155	7685	9579	5410
	India	IN	Kandla	4655	6465	2956	7059	3723	5056	2789	5404	7099	3920	4096	4546	3462	4344		3829	5705		5304	3244	5547	4145	2793	3555			3447		6164		6799	7348	6131	6427	4267	6230	6683	6907	5153	5808	4544	7131	3554	4084	5978	1343
	Indonesia	ID	Balikpapan	7728	7692	6029	8286	6796	8129	4711	6631	8326	5253	7169	1169	942	1736	3829		2657		2527	1060	2093	1022	1063	1698			1492		9237		9872	10421	9204	9500	7340	9303	9756	9980	8226	3023	7617	10204	6627	7157	9051	4895
	Japan	JP	Tokyo	9617	10118	7918	10712	8685	10018	6969	9057	10752	7679	9058	3033	2390	1679	5705	2657			669	2688	3444	1788	2927	2914			2430		11126		11761	12310	11093	11389	9229	11192	11645	11869	10115	949	9506	12093	8516	9046	10940	6771
	Kazakhstan	KZ	#N/A
	Korea	KR	Busan	9216	9723	7517	10317	8284	9617	6568	8662	10357	7284	8657	2934	2004	1223	5304	2527	669			2328	3555	1438	2513	2492			2005		10725		11360	11909	10692	10988	8828	10791	11244	11468	9714	509	9105	11692	8115	8645	10539	6370
	Malaysia	MY	Kuching	7156	7511	5457	8105	6224	7557	4508	6450	8145	5072	6597	1898	329	1435	3244	1060	2688		2328		2848	1035	454	908			629		8665		9300	9849	8632	8928	6768	8731	9184	9408	7654	2826	7045	9632	6055	6585	8479	4310
	Papua New Guinea	PG	Port Moresby	9441	8941	7742	9535	8509	9842	6324	7880	9575	6607	8882	1179	2606	3148	5547	2093	3444		3555	2848		2461	2860	3474			3144		10950		11585	12134	10917	11213	9053	11016	11469	11693	9939	4049	9330	11917	8340	8870	10764	6617
	Philippines	PH	Batangas	8057	8444	6358	9038	7125	8458	5409	7383	9078	6005	7498	1737	729	743	4145	1022	1788		1438	1035	2461		1355	1378			897		9566		10201	10750	9533	9829	7669	9632	10085	10309	8555	1937	7946	10533	6956	7486	9380	5211
	Singapore	SG	Jurong	6705	7358	5006	7952	5773	7106	4057	6297	7992	4859	6146	1918	683	1560	2793	1063	2927		2513	454	2860	1355		767			658		8214		8849	9398	8181	8477	6317	8280	8733	8957	7203	3023	6594	9181	5604	6134	8028	3859
	Thailand	TH	Sattahip	7467	8097	5768	8691	6535	7868	4819	7036	8731	5621	6908	2535	1003	1595	3555	1698	2914		2492	908	3474	1378	767				604		8976		9611	10160	8943	9239	7079	9042	9495	9719	7965	2989	7356	9943	6366	6896	8790	4621
	Turkmenistan	TM	#N/A
	Uzbekistan	UZ	#N/A
	Vietnam	VN	Ho Chi Minh City	7359	7916	5660	8510	6427	7760	4711	6855	8550	5477	6800	2327	635	1010	3447	1492	2430		2005	629	3144	897	658	604					8868		9503	10052	8835	9131	6971	8934	9387	9611	7857	2505	7248	9835	6258	6788	8682	4513
	Azerbaijan	AZ	#N/A
	Belgium	BE	Zeebrugge	1530	4758	3208	4415	2676	1320	6603	5479	4320	6878	2330	9950	8883	9765	6164	9237	11126		10725	8665	10950	9566	8214	8976			8868				669	1218	76	280	2959	87	551	777	1046	11229	1810	1001	2936	3437	462	6536
	Czech	CZ	#N/A
	Denmark	DK	Fredericia	2165	5393	3843	5050	3311	1955	7238	6114	4955	7513	2965	10585	9518	10400	6799	9872	11761		11360	9300	11585	10201	8849	9611			9503		669			723	710	488	3594	626	257	253	1681	11864	2445	507	3571	4072	1097	7171
	Finland	FI	Pori	2714	5942	4392	5599	3860	2504	7787	6663	5504	8062	3514	11134	10067	10949	7348	10421	12310		11909	9849	12134	10750	9398	10160			10052		1218		723		1259	1037	4143	1175	793	549	2230	12413	2994	254	4120	4621	1646	7720
	France	FR	Dunkirk	1497	4725	3175	4382	2643	1287	6570	5446	4287	6845	2297	9917	8850	9732	6131	9204	11093		10692	8632	10917	9533	8181	8943			8835		76		710	1259		338	2926	141	594	818	1013	11196	1777	1042	2903	3404	432	6503
	Germany	DE	Wilhelmshaven	1793	5021	3471	4678	2939	1583	6866	5742	4583	7141	2593	10213	9146	10028	6427	9500	11389		10988	8928	11213	9829	8477	9239			9131		280		488	1037	338		3222	247	371	596	1309	11492	2073	820	3199	3700	725	6799
	Italy	IT	Porto San Leonardo	1452	5407	1311	5068	1014	1851	4706	6129	4973	5867	985	8053	6986	7868	4267	7340	9229		8828	6768	9053	7669	6317	7079			6971		2959		3594	4143	2926	3222		3025	3478	3702	1948	9332	1316	3926	1015	1511	2773	4639
	Netherlands	NL	Rotterdam	1596	4824	3274	4481	2742	1386	6669	5545	4386	6944	2396	10016	8949	9831	6230	9303	11192		10791	8731	11016	9632	8280	9042			8934		87		626	1175	141	247	3025		503	734	1112	11295	1876	958	3002	3503	528	6602
	Norway	NO	Heroya	2049	5277	3727	4934	3195	1839	7122	5998	4839	7397	2849	10469	9402	10284	6683	9756	11645		11244	9184	11469	10085	8733	9495			9387		551		257	793	594	371	3478	503		352	1565	11748	2329	577	3455	3956	981	7055
	Poland	PL	Swinoujscie	2273	5501	3951	5158	3419	2063	7346	6222	5063	7621	3073	10693	9626	10508	6907	9980	11869		11468	9408	11693	10309	8957	9719			9611		777		253	549	818	596	3702	734	352		1789	11972	2553	333	3679	4180	1205	7279
	Portugal	PT	Setubal	519	3798	2197	3456	1665	313	5592	4518	3361	5917	1319	8939	7872	8754	5153	8226	10115		9714	7654	9939	8555	7203	7965			7857		1046		1681	2230	1013	1309	1948	1112	1565	1789		10218	799	2013	1925	2426	860	5525
	Russia	RU	Vladivostok	9720	10223	8021	10817	8788	10121	7072	9162	10857	7784	9161	3428	2508	1722	5808	3023	949		509	2826	4049	1937	3023	2989			2505		11229		11864	12413	11196	11492	9332	11295	11748	11972	10218		9609	12196	8619	9149	11043	6874
	Spain	ES	Barcelona	362	4258	1588	3919	1056	702	4983	4980	3824	6144	721	8330	7263	8145	4544	7617	9506		9105	7045	9330	7946	6594	7356			7248		1810		2445	2994	1777	2073	1316	1876	2329	2553	799	9609		2777	1316	1811	1624	4916
	Sweden	SE	Nynashamn	2497	5725	4175	5382	3643	2287	7570	6446	5287	7845	3297	10917	9850	10732	7131	10204	12093		11692	9632	11917	10533	9181	9943			9835		1001		507	254	1042	820	3926	958	577	333	2013	12196	2777		3903	4404	1429	7503
	Turkiye	TR	Izmir	1427	5384	598	5045	664	1828	3993	6106	4950	5154	921	7340	6273	7155	3554	6627	8516		8115	6055	8340	6956	5604	6366			6258		2936		3571	4120	2903	3199	1015	3002	3455	3679	1925	8619	1316	3903		615	2750	3926
	Ukraine	UA	Odessa	1922	5885	1128	5546	1158	2329	4523	6607	5451	5684	1416	7870	6803	7685	4084	7157	9046		8645	6585	8870	7486	6134	6896			6788		3437		4072	4621	3404	3700	1511	3503	3956	4180	2426	9149	1811	4404	615		3251	4456
	United Kingdom	GB	Milford haven	1344	4572	3022	4229	2490	1134	6417	5293	4134	6692	2144	9764	8697	9579	5978	9051	10940		10539	8479	10764	9380	8028	8790			8682		462		1097	1646	432	725	2773	528	981	1205	860	11043	1624	1429	2750	3251		6350
	Iran	IR	Bandar Mahshahr	5027	6946	3328	7540	4095	5428	3249	5885	7580	4401	4468	5612	4528	5410	1343	4895	6771		6370	4310	6617	5211	3859	4621			4513		6536		7171	7720	6503	6799	4639	6602	7055	7279	5525	6874	4916	7503	3926	4456	6350
	Iraq	IQ	Fao	5000	6919	3301	7513	4068	5401	3222	5858	7553	4374	4441	5585	4501	5383	1317	4868	6744		6343	4283	6590	5184	3832	4594			4486		6509		7144	7693	6476	6772	4612	6575	7028	7252	5498	6847	4889	7476	3899	4429	6323	105
	Israel	IL	Ashdod	1789	5748	123	5409	868	2192	3518	6163	5314	4679	1238	6865	5798	6680	3079	6152	8041		7640	5580	7865	6481	5129	5891			5783		3300		3935	4484	3267	3563	1387	3366	3819	4043	2289	8144	1678	4267	652	1181	3114	3451
	Kuwait	KW	Mina Al Ahmadi	4985	6904	3286	7498	4053	5386	3207	5843	7538	4359	4426	5570	4486	5368	1301	4853	6729		6328	4268	6575	5169	3817	4579			4471		6494		7129	7678	6461	6757	4597	6560	7013	7237	5483	6832	4874	7461	3884	4414	6308	128
	Oman	OM	Muscat	4291	6210	2592	6804	3359	4692	2513	5149	6844	3665	3732	4887	3803	4685	677	4170	6046		5645	3585	5888	4486	3134	3896			3788		5800		6435	6984	5767	6063	3903	5866	6319	6543	4789	6149	4180	6767	3190	3720	5614	739
	Qatar	QA	Doha	4768	6687	3069	7281	3836	5169	2990	5626	7321	4142	4209	5353	4269	5151	1084	4636	6512		6111	4051	6358	4952	3600	4362			4254		6277		6912	7461	6244	6540	4380	6343	6796	7020	5266	6615	4657	7244	3667	4197	6091	394
	Saudi Arabia	SA	Yanbu	2246	6203	547	5864	1314	2647	2852	5497	5769	4013	1687	6199	5132	6014	2413	5486	7375		6974	4914	7199	5815	4463	5225			5117		3755		4390	4939	3722	4018	1858	3821	4274	4498	2744	7478	2135	4722	1145	1675	3569	2785
	United Arab Emirates	AE	Ruwais	4755	6674	3056	7268	3823	5156	2977	5613	7308	4129	4196	5340	4256	5138	1072	4623	6499		6098	4038	6345	4939	3587	4349			4241		6264		6899	7448	6231	6527	4367	6330	6783	7007	5253	6602	4644	7231	3654	4184	6078	480
	Canada	CA	Argentia	2575	4935	4253	4599	3721	2290	7648	5656	4504	7051	3375	10995	9928	10810	7209	10282	10380		10755	9710	10836	10611	9259	10021			9913		2328		2623	3172	2300	2503	4004	2394	2467	2731	2123	10419	2855	2955	3981	4482	1991	7581
	Mexico	MX	Tampico	5092	6654	6770	6328	6238	4790	9443	7113	6233	8267	5892	10830	11373	10791	9726	11382	9211		9586	11695	9667	10895	11776	12019			11334		5076		5425	5974	5048	5305	6521	5142	5269	5533	4655	9250	5372	5757	6498	6999	4756	10098
	Trinidad and Tobago	TT	Point Fortin	3646	4530	5324	4241	4792	3290	7260	4929	4146	6084	4446	10497	10999	10458	8280	11049	8878		9253	10781	9334	10562	10330	11092			10984		3985		4524	5073	3952	4248	5075	4051	4368	4632	3299	8917	3926	4856	5052	5553	3733	8652
	United States	US	Houston	5003	6588	6681	6261	6149	4700	9453	7094	6166	8277	5803	10885	11428	10846	9637	11437	9266		9641	11750	9722	10950	11687	12074			11389		4986		5335	5884	4958	5215	6432	5052	5179	5443	4565	9305	5283	5667	6409	6910	4666	10009
	Argentina	AR	Bahia Blanca	5802	4483	7480	4683	6948	5429	5721	3955	4645	4545	6602	9036	9750	10745	8455	9682	10238		10634	9501	8001	10089	9348	10087			9906		6554		7189	7738	6521	6817	7231	6620	7073	7297	5608	10828	6082	7521	7208	7709	6360	8936
	Bolivia	BO	#N/A
	Brazil	BR	Rio de Janeiro	4425	3375	6103	3451	5571	4051	5202	3167	3392	4026	5225	9363	9231	10226	7936	9163	11509		11194	8982	9223	9915	8829	9568			9387		5177		5812	6361	5144	5440	5854	5243	5696	5920	4233	11694	4705	6144	5831	6332	4979	8417
	Chile	CL	Quintero	7202	6426	14029	6727	8348	6972	12024	5846	6675	11842	8002	8575	10002	10307	12116	9489	9282		9954	10244	7418	9635	10032	10737			10556		7377		7804	8353	7349	7640	8631	7443	7648	7912	6812	9563	7482	8136	8608	9109	7071	13175
	Peru	PE	Pisco	6051	7131	14656	6834	7197	5821	12651	6946	6739	12469	6851	9041	10287	10116	12743	9984	8537		8932	10575	7883	9812	10659	11181			10697		6226		6653	7202	6198	6489	7480	6292	6497	6761	5661	8675	6331	6985	7457	7958	5920	13802
	Venezuela	VE	Guiria	3662	4546	5340	4257	4808	3306	7276	4945	4162	6100	4462	10513	11015	10474	8296	11065	8894		9269	10797	9350	10578	10346	11108			11000		4001		4540	5089	3968	4264	5091	4067	4384	4648	3315	8933	3942	4872	5068	5569	3749	8668
[truncated: 17 more columns]

## Sheet: Ammonia Supply Chain
	Select below option
	Blue_Grid_MDOship	GHG [kgCO2e/kgNH3]	Destination	Africa											Asia-Pacific																Europe																		Middle East
		Origin		DZ	AO	EG	GQ	LY	MA	MZ	NA	NG	ZA	TN	AU	BN	CN	IN	ID	JP	KZ	KR	MY	PG	PH	SG	TH	TM	UZ	VN	AZ	BE	CZ	DK	FI	FR	DE	IT	NL	NO	PL	PT	RU	ES	SE	TR	UA	GB	IR
		Africa	DZ	0.806776	0.889004	0.85429	0.886974	0.847507	0.835349	0.906391	0.899073	0.883819	0.933763	0.838844	0.970423	0.951892	0.964923	0.907391	0.958919	0.987065	0.819421	0.979464	0.946462	0.985982	0.962864	0.937458	0.950986	0.820931	0.820085	0.947972	0.819511	0.846903	0.820549	0.858174	0.866384	0.845494	0.854779	0.848176	0.850281	0.854063	0.867835	0.830294	0.987562	0.827961	0.861676	0.848659	0.854713	0.844992	0.909738
			AO	0.466386	0.385586	0.493774	0.411651	0.487226	0.46216	0.457276	0.413098	0.410829	0.448332	0.478687	0.533259	0.530501	0.545017	0.510468	0.530462	0.566625	0.395	0.559289	0.524653	0.549204	0.541205	0.520722	0.533556	0.39651	0.395664	0.52939	0.395091	0.474507	0.396129	0.485518	0.493503	0.473111	0.482275	0.487728	0.477858	0.481455	0.495135	0.459146	0.567111	0.466991	0.488884	0.488254	0.494205	0.472671	0.514449
			EG	0.751286	0.813687	0.70403	0.811691	0.737777	0.760379	0.774551	0.818039	0.808545	0.804275	0.741139	0.838238	0.819818	0.832758	0.775597	0.826809	0.854759	0.716532	0.8472	0.81441	0.853695	0.83072	0.805453	0.818902	0.718041	0.717196	0.8159	0.716622	0.771825	0.71766	0.783034	0.791191	0.770419	0.779675	0.742726	0.775197	0.778935	0.792685	0.755314	0.855245	0.745448	0.786504	0.731722	0.738311	0.769932	0.777905
			GQ	0.823459	0.769563	0.851437	0.743546	0.844701	0.818907	0.829883	0.784823	0.763068	0.820525	0.836041	0.907337	0.904531	0.919402	0.88404	0.904469	0.941495	0.756139	0.934018	0.898595	0.923655	0.915479	0.89461	0.907706	0.757649	0.756803	0.903476	0.75623	0.831787	0.757268	0.843021	0.8512	0.830379	0.839648	0.845303	0.835161	0.838917	0.852676	0.816106	0.942018	0.824162	0.846504	0.845822	0.851948	0.829886	0.888191
			LY	0.993324	1.0567	0.986448	1.05462	0.952636	1.00253	1.03903	1.06688	1.05145	1.06904	0.981738	1.10354	1.08486	1.09801	1.03997	1.09193	1.12035	0.967038	1.11269	1.0794	1.11924	1.09593	1.07033	1.08396	0.968548	0.967702	1.08093	0.967129	1.01425	0.968167	1.02561	1.0339	1.01283	1.02216	0.988668	1.01763	1.02148	1.03529	0.99749	1.12086	0.987476	1.02916	0.983642	0.989749	1.01231	1.04237
			MA	1.02024	1.07008	1.04862	1.0678	1.04176	0.991821	1.10134	1.08026	1.06474	1.11505	1.03301	1.16599	1.14726	1.16045	1.10226	1.15435	1.18285	1.00652	1.17517	1.14179	1.18173	1.15836	1.1327	1.14637	1.00803	1.00718	1.14334	1.00661	1.03083	1.00765	1.04221	1.05052	1.02941	1.03875	1.04243	1.03422	1.03808	1.05189	1.0141	1.18336	1.02101	1.04577	1.04294	1.04918	1.02888	1.10467
			MZ	0.682892	0.656595	0.654601	0.670112	0.669492	0.691937	0.583739	0.636939	0.669216	0.62336	0.67281	0.688956	0.678909	0.691741	0.647986	0.679737	0.713575	0.592121	0.706064	0.673528	0.704753	0.689727	0.664626	0.677982	0.593631	0.592785	0.674992	0.592211	0.703254	0.593249	0.714389	0.722481	0.701852	0.711073	0.674377	0.706618	0.710303	0.724027	0.686861	0.714048	0.677067	0.717819	0.663456	0.669983	0.701382	0.651708
			NA	0.489077	0.425981	0.51094	0.439438	0.509929	0.48483	0.450722	0.398077	0.438502	0.441766	0.501387	0.526745	0.523985	0.538512	0.503941	0.523946	0.560133	0.405801	0.552793	0.518135	0.542701	0.534697	0.514202	0.527044	0.407311	0.406465	0.522876	0.405892	0.49719	0.40693	0.508208	0.5162	0.495794	0.504961	0.510435	0.500542	0.504144	0.517827	0.481803	0.56062	0.489685	0.511578	0.510961	0.516917	0.495353	0.507925
			NG	0.801045	0.749551	0.82899	0.743873	0.822265	0.796619	0.809713	0.764673	0.724097	0.800379	0.813611	0.887083	0.88428	0.89913	0.863815	0.884219	0.921195	0.7354	0.913727	0.878349	0.90338	0.895214	0.874367	0.887448	0.73691	0.736064	0.883222	0.735491	0.809358	0.736528	0.820579	0.828747	0.807951	0.817213	0.822861	0.812731	0.816478	0.830232	0.793696	0.921717	0.801743	0.824055	0.82338	0.829496	0.807461	0.867956
			ZA	1.49678	1.43143	1.46973	1.4454	1.48521	1.49199	1.40631	1.41096	1.44454	1.36678	1.48882	1.48995	1.48524	1.50072	1.46212	1.48514	1.52364	1.38402	1.51592	1.47915	1.50691	1.4966	1.47403	1.48798	1.38553	1.38468	1.48428	1.38411	1.50548	1.38515	1.51711	1.52563	1.50406	1.51351	1.49052	1.5089	1.51294	1.52683	1.48918	1.52423	1.49342	1.5208	1.47904	1.48598	1.50347	1.46657
			TN	0.844417	0.907226	0.849661	0.905195	0.841583	0.853551	0.901775	0.9173	0.902039	0.931622	0.812195	0.965819	0.947285	0.960319	0.902773	0.954313	0.982466	0.824175	0.974863	0.941853	0.981383	0.958259	0.932848	0.946379	0.825685	0.824839	0.943364	0.824265	0.865111	0.825303	0.876386	0.884599	0.863702	0.872988	0.845092	0.86849	0.872274	0.886048	0.848496	0.982963	0.838752	0.87989	0.84492	0.850976	0.863199	0.905121
		Asia-Pacific	AU	0.882898	0.870021	0.854363	0.883624	0.869364	0.892002	0.825234	0.850211	0.882734	0.839947	0.872736	0.720516	0.774225	0.782595	0.821069	0.764484	0.792039	0.735352	0.789524	0.77383	0.762918	0.772395	0.772741	0.783777	0.736862	0.736016	0.7791	0.735443	0.903479	0.736481	0.914705	0.922877	0.902072	0.911336	0.874327	0.906852	0.910603	0.924359	0.88694	0.797409	0.877057	0.918184	0.863304	0.869907	0.90158	0.834992
			BN	0.823447	0.826194	0.794983	0.839773	0.809951	0.832534	0.774205	0.806427	0.838881	0.794462	0.813308	0.733439	0.67974	0.721476	0.761497	0.719344	0.739885	0.69407	0.732587	0.706279	0.745364	0.714207	0.71076	0.716816	0.695579	0.694734	0.70948	0.69416	0.843964	0.695198	0.855164	0.863312	0.842558	0.85181	0.814892	0.847335	0.851066	0.864813	0.827468	0.740618	0.81761	0.858628	0.803899	0.81048	0.842073	0.775375
			CN	0.96821	0.972907	0.93953	0.986562	0.954596	0.977349	0.918632	0.953004	0.985676	0.940864	0.958	0.872893	0.852436	0.810089	0.905763	0.861814	0.857246	0.823002	0.848724	0.853913	0.883808	0.843543	0.854591	0.855898	0.824512	0.823666	0.84487	0.823093	0.988921	0.824131	1.0002	1.00842	0.987511	0.996801	0.959606	0.9923	0.996089	1.00986	0.972295	0.856733	0.96236	1.00371	0.948522	0.955171	0.987006	0.919777
			IN	1.10391	1.13098	1.07491	1.14475	1.09012	1.11312	1.06713	1.11088	1.14387	1.09668	1.09359	1.10477	1.08575	1.09894	1.00277	1.09306	1.12134	1.01824	1.11367	1.08028	1.12053	1.09685	1.07119	1.08486	1.01975	1.0189	1.08183	1.01833	1.1249	1.01936	1.13629	1.14462	1.12348	1.13282	1.09523	1.12829	1.13216	1.14598	1.10808	1.12186	1.09804	1.13986	1.08401	1.09076	1.12295	1.04703
			ID	1.02633	1.02203	0.99754	1.03572	1.01266	1.03549	0.970355	1.00206	1.03484	0.989831	1.01608	0.918376	0.913952	0.92555	0.963851	0.874155	0.940348	0.889459	0.937295	0.914177	0.93271	0.914793	0.912804	0.924235	0.890969	0.890123	0.919562	0.889549	1.04714	0.890587	1.05846	1.06671	1.04572	1.05503	1.0177	1.05052	1.05434	1.06813	1.03045	0.945287	1.02047	1.06199	1.00657	1.01325	1.04521	0.977932
			JP	1.01636	1.0211	0.98763	1.03477	1.00272	1.02551	0.966707	1.00117	1.03389	0.988992	1.00613	0.908227	0.896811	0.883051	0.953805	0.902381	0.835695	0.848013	0.864457	0.90006	0.913892	0.886171	0.90266	0.90316	0.849523	0.848677	0.893816	0.848104	1.03711	0.849142	1.0484	1.05664	1.0357	1.04499	1.00774	1.04049	1.04429	1.05807	1.02045	0.868793	1.0105	1.05192	0.996639	1.0033	1.03519	0.967846
			KZ	0.809924	0.806231	0.809808	0.809897	0.81198	0.81232	0.804863	0.804167	0.808339	0.815194	0.809113	0.812639	0.812044	0.810249	0.813241	0.813121	0.809511	0.797406	0.808651	0.810278	0.811387	0.811536	0.808855	0.809575	0.812119	0.811273	0.808376	0.810699	0.805261	0.811737	0.805863	0.804849	0.804406	0.808718	0.807844	0.80753	0.803701	0.81371	0.805635	0.808276	0.80594	0.803787	0.808747	0.806485	0.806474	0.809336
			KR	0.982235	0.987065	0.953555	1.00072	0.968621	0.991373	0.932658	0.967163	0.999834	0.955024	0.972025	0.879358	0.863137	0.84822	0.91979	0.873002	0.838174	0.820904	0.809305	0.866815	0.888542	0.853119	0.868501	0.868868	0.822414	0.821568	0.859486	0.820995	1.00294	0.822033	1.01422	1.02244	1.00153	1.01082	0.973631	1.00632	1.01011	1.02389	0.986319	0.834251	0.976384	1.01773	0.962547	0.969195	1.00103	0.933802
			MY	0.763194	0.765404	0.734824	0.77895	0.74975	0.772259	0.714099	0.745696	0.778057	0.733808	0.753086	0.67848	0.651803	0.668393	0.70146	0.665031	0.688486	0.637879	0.681641	0.625027	0.693022	0.66303	0.650692	0.658958	0.639389	0.638543	0.653122	0.63797	0.783628	0.639008	0.794792	0.80291	0.782224	0.791459	0.754661	0.786995	0.790701	0.804435	0.767187	0.689545	0.757364	0.798239	0.743707	0.750259	0.781747	0.715279
			PG	0.918548	0.906481	0.889979	0.920096	0.904995	0.92766	0.861291	0.886649	0.919207	0.87636	0.908375	0.78294	0.806229	0.813507	0.856659	0.798719	0.817723	0.75409	0.818721	0.808514	0.740273	0.803293	0.807292	0.818289	0.755599	0.754754	0.811567	0.75418	0.939159	0.755218	0.950398	0.958581	0.937751	0.947021	0.90997	0.942534	0.946293	0.960054	0.9226	0.826615	0.912705	0.953883	0.898932	0.905546	0.937257	0.87067
			PH	0.897275	0.900063	0.868707	0.913679	0.883723	0.906387	0.847871	0.880231	0.91279	0.868182	0.887102	0.794172	0.776706	0.775145	0.835086	0.782686	0.791898	0.755979	0.78518	0.780061	0.80504	0.742039	0.783995	0.785099	0.757489	0.756643	0.77585	0.756069	0.917886	0.757107	0.929125	0.937307	0.916478	0.925748	0.888697	0.921261	0.92502	0.938781	0.901327	0.793157	0.891432	0.93261	0.87766	0.884274	0.915984	0.849029
			SG	0.853259	0.860487	0.824729	0.874089	0.839727	0.862361	0.803914	0.840678	0.873199	0.827656	0.843098	0.775926	0.754685	0.767551	0.791157	0.762114	0.789668	0.734755	0.781886	0.749091	0.790423	0.76541	0.723027	0.75362	0.736264	0.735419	0.750599	0.734845	0.873835	0.735883	0.885059	0.893229	0.872428	0.881691	0.844689	0.877208	0.880957	0.894713	0.857299	0.790037	0.847418	0.888537	0.833668	0.84027	0.871937	0.805077
			TH	0.804259	0.811065	0.775829	0.824632	0.790782	0.813337	0.75507	0.791318	0.82374	0.778765	0.794131	0.724791	0.698675	0.706742	0.742387	0.711329	0.727977	0.673492	0.720087	0.695326	0.739183	0.704413	0.691555	0.661201	0.675001	0.674155	0.688361	0.673582	0.824746	0.67462	0.835932	0.84407	0.82334	0.832587	0.795712	0.828115	0.831837	0.84558	0.80827	0.727992	0.798425	0.839391	0.784733	0.791303	0.822859	0.756244
			TM	1.6042	1.60051	1.60408	1.60417	1.60625	1.60659	1.59914	1.59844	1.60261	1.60947	1.60339	1.60691	1.60632	1.60452	1.60752	1.6074	1.60379	1.60488	1.60293	1.60455	1.60566	1.60581	1.60313	1.60385	1.59007	1.60555	1.60265	1.60497	1.59954	1.60601	1.60014	1.59912	1.59868	1.60299	1.60212	1.6018	1.59798	1.60798	1.59991	1.60255	1.60021	1.59806	1.60302	1.60076	1.60075	1.60361
			UZ	0.950436	0.946743	0.95032	0.95041	0.952492	0.952832	0.945376	0.944679	0.948851	0.955706	0.949625	0.953151	0.952557	0.950761	0.953753	0.953633	0.950023	0.951121	0.949163	0.95079	0.951899	0.952048	0.949368	0.950087	0.952631	0.937308	0.948889	0.951212	0.945773	0.952249	0.946375	0.945361	0.944918	0.94923	0.948356	0.948042	0.944213	0.954222	0.946148	0.948788	0.946452	0.944299	0.949259	0.946997	0.946986	0.949849
			VN	0.731709	0.73726	0.703396	0.750786	0.718296	0.74076	0.682702	0.717587	0.749891	0.705744	0.721619	0.65092	0.622254	0.626681	0.670106	0.637549	0.649501	0.603286	0.64159	0.620389	0.663224	0.626092	0.619447	0.619271	0.604796	0.60395	0.592013	0.603377	0.752092	0.604415	0.763235	0.771334	0.750689	0.759914	0.723188	0.755456	0.759147	0.772874	0.735685	0.64951	0.725882	0.76667	0.712259	0.718793	0.750217	0.68389
		Europe	AZ	0.666488	0.662794	0.666372	0.666461	0.668544	0.668884	0.661427	0.660731	0.664902	0.671758	0.665677	0.669203	0.668608	0.666813	0.669805	0.669685	0.666075	0.667173	0.665215	0.666842	0.667951	0.668099	0.665419	0.666139	0.668682	0.667837	0.66494	0.653961	0.661825	0.668301	0.662427	0.661413	0.660969	0.665282	0.664408	0.664094	0.660265	0.670274	0.662199	0.664839	0.662504	0.660351	0.665311	0.663049	0.663038	0.6659
			BE	0.373239	0.422286	0.400538	0.420348	0.394018	0.372203	0.451067	0.432004	0.417237	0.465891	0.385497	0.513539	0.495507	0.508126	0.452271	0.502368	0.529631	0.342086	0.522217	0.490178	0.52863	0.50616	0.481385	0.494557	0.343595	0.342749	0.491594	0.342176	0.333492	0.343214	0.355111	0.363066	0.343966	0.351611	0.394505	0.34727	0.351021	0.364722	0.361042	0.530079	0.373829	0.358459	0.395033	0.400957	0.35234	0.454445
			CZ	0.969879	0.966186	0.969763	0.969852	0.971935	0.972275	0.964818	0.964122	0.968293	0.975149	0.969068	0.972594	0.971999	0.970204	0.973196	0.973076	0.969466	0.970564	0.968606	0.970233	0.971342	0.971491	0.96881	0.96953	0.972074	0.971228	0.968331	0.970654	0.965216	0.95636	0.965818	0.964804	0.964361	0.968673	0.967799	0.967485	0.963656	0.973665	0.96559	0.968231	0.965895	0.963742	0.968702	0.96644	0.966429	0.969291
			DK	0.375078	0.4241	0.402364	0.422165	0.395848	0.374044	0.452866	0.433812	0.419055	0.467688	0.38733	0.515311	0.497288	0.5099	0.454074	0.504147	0.531394	0.333573	0.523984	0.491961	0.530395	0.507935	0.483171	0.496337	0.335083	0.334237	0.493375	0.333664	0.345986	0.334702	0.324489	0.346456	0.3458	0.346487	0.396333	0.347553	0.337699	0.347642	0.362885	0.531841	0.375666	0.341867	0.396861	0.402781	0.354188	0.456245
			FI	0.440968	0.49017	0.468348	0.488216	0.461802	0.439923	0.519039	0.499922	0.4851	0.533877	0.453265	0.581672	0.563589	0.57625	0.520222	0.570467	0.597821	0.390315	0.590388	0.558249	0.596812	0.574275	0.549434	0.562643	0.391825	0.390979	0.559675	0.390406	0.411793	0.391444	0.404285	0.382038	0.41161	0.412285	0.462303	0.413358	0.40327	0.409281	0.428749	0.598274	0.441572	0.394526	0.462829	0.468777	0.420019	0.522414
			FR	0.474852	0.524219	0.502317	0.522247	0.495744	0.473796	0.553183	0.534008	0.519126	0.568035	0.487189	0.61599	0.597851	0.610558	0.554343	0.604748	0.6322	0.444029	0.624746	0.5925	0.631182	0.608572	0.583662	0.59691	0.445539	0.444693	0.593936	0.444119	0.446833	0.445157	0.457855	0.465865	0.436091	0.454596	0.496259	0.45017	0.453787	0.467477	0.462608	0.632658	0.47547	0.461236	0.496785	0.502758	0.453897	0.556554
			DE	0.663259	0.713202	0.691023	0.711169	0.684356	0.662166	0.742497	0.72312	0.708031	0.757398	0.675739	0.805906	0.787574	0.800441	0.743578	0.794535	0.822329	0.627144	0.814802	0.782185	0.821279	0.798419	0.773265	0.786651	0.628654	0.627808	0.783657	0.627234	0.63346	0.628272	0.637518	0.645624	0.633568	0.615579	0.684921	0.635181	0.633412	0.647159	0.650929	0.822806	0.663927	0.640957	0.685443	0.691505	0.642066	0.745856
			IT	0.887459	0.950364	0.884969	0.948321	0.882141	0.896573	0.937191	0.960461	0.945162	0.967075	0.878786	1.00134	0.982774	0.995836	0.938175	0.989813	1.01803	0.85655	1.01041	0.977335	1.01694	0.99377	0.968316	0.981871	0.858059	0.857213	0.978853	0.85664	0.908169	0.857678	0.919464	0.927695	0.906758	0.916055	0.845597	0.91155	0.915349	0.92913	0.891521	1.01853	0.881186	0.922979	0.878925	0.885014	0.906251	0.940535
			NL	0.524878	0.574397	0.552423	0.572409	0.545825	0.523813	0.603449	0.584221	0.569284	0.618314	0.537254	0.666414	0.648225	0.660974	0.604588	0.655139	0.682681	0.492325	0.675208	0.642864	0.681654	0.658979	0.634004	0.647289	0.493835	0.492989	0.644309	0.492416	0.495343	0.493454	0.504829	0.512864	0.495378	0.501437	0.546353	0.481798	0.50064	0.514456	0.512612	0.683144	0.52551	0.508225	0.546878	0.552875	0.503824	0.606817
			NO	0.155762	0.204103	0.182695	0.20224	0.176291	0.154772	0.232478	0.213662	0.19915	0.247242	0.167846	0.29421	0.276414	0.288838	0.233779	0.283197	0.310041	0.116712	0.302716	0.271134	0.309079	0.286916	0.26244	0.275444	0.118221	0.117376	0.272504	0.116802	0.126952	0.11784	0.122815	0.130441	0.12679	0.127507	0.176716	0.128447	0.109503	0.132193	0.143671	0.310466	0.156291	0.125897	0.177249	0.183063	0.135096	0.235871
			PL	1.01356	1.06458	1.04188	1.06243	1.03504	1.0124	1.09449	1.07474	1.05926	1.10948	1.02631	1.15902	1.14033	1.1535	1.09542	1.14741	1.17584	0.968515	1.16818	1.13487	1.17473	1.15141	1.1258	1.13944	0.970024	0.969179	1.13641	0.968605	0.983549	0.969643	0.975273	0.979274	0.983388	0.983939	1.0357	0.985089	0.974788	0.952691	1.00107	1.17636	1.01432	0.974552	1.03621	1.04244	0.992014	1.09783
			PT	0.83364	0.885034	0.861713	0.882954	0.854947	0.832576	0.913813	0.895069	0.879799	0.929606	0.846267	0.977844	0.959314	0.972345	0.914813	0.966341	0.994487	0.81848	0.986886	0.953884	0.993404	0.970286	0.94488	0.958408	0.819989	0.819143	0.955394	0.81857	0.837829	0.819608	0.849099	0.857308	0.83642	0.845705	0.855565	0.841207	0.844988	0.85876	0.809359	0.994983	0.83436	0.8526	0.856082	0.862237	0.835918	0.91716
			RU	0.773121	0.777779	0.7448	0.791308	0.759705	0.782175	0.724102	0.758101	0.790413	0.746252	0.76303	0.671398	0.655537	0.640699	0.7115	0.665159	0.627135	0.605488	0.618975	0.659048	0.680452	0.645553	0.660894	0.661049	0.606997	0.606152	0.651819	0.605578	0.793512	0.606616	0.804658	0.81276	0.792109	0.801336	0.764599	0.796877	0.80057	0.814298	0.777101	0.594296	0.767295	0.808095	0.753666	0.760203	0.791637	0.725289
			ES	0.695185	0.756432	0.715502	0.754447	0.708807	0.703247	0.767152	0.766405	0.751305	0.79684	0.700356	0.830736	0.812348	0.825261	0.768211	0.819328	0.84722	0.68279	0.839673	0.806947	0.846161	0.823229	0.798004	0.81143	0.6843	0.683454	0.80843	0.68288	0.714655	0.683918	0.725842	0.733979	0.71325	0.722496	0.709004	0.718024	0.721746	0.735489	0.698179	0.847703	0.673482	0.7293	0.709908	0.715896	0.712768	0.770508
			SE	0.233349	0.28191	0.260396	0.280024	0.253956	0.232345	0.310412	0.291519	0.276928	0.325195	0.245487	0.372375	0.354506	0.36699	0.311683	0.361313	0.388288	0.186865	0.380935	0.34921	0.387314	0.365055	0.340486	0.353542	0.188375	0.187529	0.350595	0.186956	0.204469	0.187994	0.197075	0.191966	0.204277	0.204996	0.254401	0.206042	0.196046	0.202105	0.221225	0.38872	0.233897	0.179554	0.254932	0.26078	0.21261	0.3138
			TR	0.835782	0.898524	0.821751	0.896498	0.825031	0.844909	0.8738	0.908585	0.893344	0.903625	0.826477	0.93778	0.919266	0.932284	0.874807	0.926288	0.954405	0.805395	0.94681	0.913839	0.953325	0.930228	0.904843	0.918359	0.806904	0.806059	0.915346	0.805485	0.856451	0.806523	0.867714	0.875918	0.855042	0.864324	0.826786	0.859828	0.863605	0.877374	0.839853	0.954899	0.829935	0.871213	0.793724	0.818713	0.854542	0.877148
			UA	0.555581	0.617316	0.542358	0.615385	0.545025	0.564695	0.59346	0.627174	0.612258	0.62296	0.546416	0.656502	0.638288	0.651057	0.59459	0.64521	0.672795	0.517592	0.665313	0.632922	0.671765	0.649058	0.624052	0.637354	0.519101	0.518255	0.634372	0.517682	0.575928	0.51872	0.587014	0.595064	0.574528	0.583727	0.546715	0.579287	0.582937	0.596644	0.559612	0.673261	0.549764	0.590419	0.532828	0.507911	0.57407	0.596827
			GB	0.463501	0.51284	0.490952	0.510871	0.484384	0.462447	0.541788	0.522623	0.507752	0.556638	0.475832	0.604565	0.586436	0.599136	0.542953	0.59333	0.620765	0.43521	0.613315	0.581087	0.619749	0.597151	0.572253	0.585495	0.43672	0.435874	0.582521	0.4353	0.444349	0.436338	0.455382	0.463387	0.443001	0.452126	0.484897	0.447702	0.451315	0.465003	0.451261	0.621223	0.464117	0.45876	0.485422	0.491391	0.425577	0.54516
		Middle East	IR	0.782291	0.810611	0.753836	0.824188	0.768801	0.791376	0.747573	0.790847	0.823297	0.777119	0.772155	0.794764	0.776088	0.789005	0.724163	0.783286	0.810972	0.692084	0.803422	0.770685	0.810279	0.786972	0.76174	0.775169	0.693594	0.692748	0.772169	0.692175	0.802801	0.693212	0.813997	0.822143	0.801395	0.810646	0.773738	0.806171	0.8099	0.823646	0.78631	0.811455	0.776456	0.817461	0.762749	0.769327	0.800911	0.679981
			IQ	1.07811	1.10698	1.04917	1.12073	1.06435	1.08731	1.04288	1.08691	1.11985	1.07276	1.06781	1.09075	1.07176	1.08493	1.01895	1.07907	1.10729	0.986748	1.09963	1.0663	1.10656	1.08284	1.05722	1.07087	0.988257	0.987411	1.06784	0.986838	1.09905	0.987876	1.11043	1.11874	1.09764	1.10698	1.06945	1.10244	1.1063	1.12011	1.08227	1.10781	1.07224	1.11399	1.05825	1.06498	1.09711	0.994484
			IL	0.492622	0.554057	0.465103	0.552147	0.479529	0.501647	0.516003	0.558822	0.549025	0.545434	0.482747	0.578843	0.560694	0.57341	0.517159	0.567594	0.595066	0.45697	0.587608	0.555341	0.594046	0.571422	0.546498	0.559754	0.45848	0.457634	0.556779	0.457061	0.512814	0.458098	0.523863	0.531881	0.511416	0.520598	0.483929	0.516169	0.519793	0.533486	0.496558	0.595525	0.486812	0.527249	0.472743	0.479182	0.510968	0.519374
			KW	0.699709	0.727876	0.671389	0.741406	0.686293	0.708763	0.665132	0.708197	0.740512	0.694587	0.689618	0.712136	0.693545	0.706393	0.641873	0.700715	0.728251	0.610646	0.720734	0.68816	0.72757	0.704375	0.679251	0.69262	0.612155	0.61131	0.689628	0.610736	0.720099	0.611774	0.731245	0.739347	0.718696	0.727923	0.691188	0.723464	0.727157	0.740885	0.703688	0.728726	0.693883	0.734682	0.680254	0.686791	0.718224	0.6185
			OM	0.590609	0.618592	0.56245	0.632065	0.577281	0.599624	0.556201	0.599014	0.631167	0.585546	0.58057	0.603161	0.584674	0.597437	0.534278	0.591808	0.619166	0.513529	0.611686	0.57931	0.618433	0.595439	0.570443	0.58374	0.515039	0.514193	0.580758	0.513619	0.610854	0.514657	0.621939	0.629989	0.609455	0.618653	0.582124	0.614213	0.617863	0.631569	0.59454	0.619631	0.584793	0.625344	0.571259	0.577745	0.608997	0.531396
			QA	0.566487	0.594412	0.53838	0.607867	0.553188	0.57549	0.532134	0.574867	0.606967	0.561443	0.556466	0.57884	0.560386	0.573122	0.509113	0.567509	0.594809	0.4817	0.587342	0.555028	0.594147	0.57113	0.546175	0.559449	0.48321	0.482364	0.556471	0.48179	0.586687	0.482828	0.597752	0.605785	0.585288	0.594477	0.558014	0.590043	0.593679	0.607379	0.570403	0.595271	0.560674	0.601147	0.547171	0.55364	0.584835	0.493843
			SA	0.693989	0.756137	0.665608	0.754163	0.680539	0.703056	0.69901	0.742325	0.751023	0.728658	0.683877	0.762479	0.744128	0.757011	0.700084	0.751096	0.778923	0.650283	0.771389	0.738735	0.77787	0.754985	0.729807	0.743206	0.651793	0.650947	0.740211	0.650373	0.714432	0.651411	0.7256	0.733722	0.713028	0.722265	0.685453	0.717799	0.721508	0.735244	0.697985	0.779402	0.688158	0.729049	0.674495	0.68105	0.71255	0.702368
			AE	0.614947	0.642963	0.58676	0.656446	0.601604	0.623969	0.58051	0.623367	0.655548	0.609874	0.6049	0.627328	0.608823	0.621601	0.557417	0.615963	0.643352	0.530122	0.635866	0.603455	0.642683	0.619599	0.59458	0.60789	0.531632	0.530786	0.604907	0.530212	0.635218	0.53125	0.646314	0.654372	0.633818	0.643021	0.606456	0.638578	0.642235	0.655945	0.618887	0.643818	0.609129	0.649724	0.595579	0.602074	0.633358	0.543733
		North America	CA	0.463325	0.498359	0.490745	0.496512	0.484186	0.461045	0.541517	0.508128	0.493394	0.542049	0.475641	0.604231	0.586121	0.598804	0.54269	0.593009	0.591008	0.414874	0.596303	0.580777	0.600369	0.596824	0.571951	0.585179	0.416384	0.415538	0.582207	0.414965	0.454609	0.416003	0.460052	0.468047	0.453294	0.460938	0.484694	0.457961	0.45533	0.469671	0.45162	0.590412	0.463936	0.463424	0.48522	0.49118	0.450292	0.54489
			MX	0.703476	0.725718	0.731222	0.723972	0.72456	0.700857	0.770669	0.731277	0.720836	0.761468	0.715948	0.801482	0.809907	0.798444	0.783747	0.811133	0.771463	0.612625	0.776832	0.81349	0.780913	0.801458	0.813412	0.818168	0.614134	0.613288	0.805591	0.612715	0.698547	0.613753	0.704944	0.713046	0.697226	0.705806	0.725123	0.701912	0.700192	0.714584	0.691931	0.770875	0.704141	0.70838	0.725645	0.731702	0.694447	0.786021
			TT	0.621107	0.63204	0.648756	0.630925	0.642125	0.617613	0.675849	0.636579	0.627794	0.666718	0.633533	0.7372	0.744915	0.734165	0.701108	0.746819	0.707275	0.554504	0.712622	0.739541	0.716698	0.737173	0.730652	0.743985	0.556014	0.555168	0.740999	0.554595	0.622053	0.555633	0.631574	0.639644	0.620652	0.629862	0.642671	0.625414	0.62683	0.641207	0.611077	0.706685	0.621756	0.634991	0.643194	0.649223	0.619096	0.70336
			US	0.756785	0.779493	0.78462	0.777713	0.77793	0.754133	0.825859	0.78586	0.774572	0.816595	0.769299	0.857496	0.865951	0.854457	0.837303	0.867177	0.827391	0.667114	0.832779	0.869551	0.836865	0.857476	0.867078	0.874247	0.668624	0.667778	0.861633	0.667205	0.751838	0.668242	0.758254	0.766385	0.750516	0.75911	0.778508	0.755206	0.753493	0.767899	0.7452	0.826805	0.757465	0.761708	0.779028	0.785112	0.747721	0.839596
		South America	AR	0.736339	0.710718	0.764122	0.71771	0.757448	0.732534	0.729932	0.699878	0.715519	0.720712	0.748828	0.792825	0.804104	0.818856	0.783767	0.80405	0.809686	0.633569	0.815412	0.798198	0.774363	0.809233	0.79423	0.807239	0.635078	0.634233	0.803031	0.633659	0.744178	0.634697	0.755338	0.763453	0.742774	0.752008	0.758017	0.747545	0.751248	0.764981	0.728825	0.818263	0.73701	0.758782	0.758538	0.764606	0.742166	0.78786
			BO	0.493259	0.489565	0.493143	0.493232	0.495315	0.495654	0.488198	0.487502	0.491673	0.498528	0.492447	0.495973	0.495379	0.493584	0.496576	0.496455	0.492845	0.493943	0.491986	0.493613	0.494721	0.49487	0.49219	0.492909	0.495453	0.494607	0.491711	0.494034	0.488595	0.495072	0.489198	0.488184	0.48774	0.492052	0.491178	0.490864	0.487036	0.497044	0.48897	0.49161	0.489275	0.487122	0.492082	0.48982	0.489808	0.492671
			BR	0.612554	0.591509	0.64017	0.596432	0.633549	0.608769	0.620334	0.586009	0.593898	0.61123	0.624964	0.696884	0.694108	0.708761	0.673899	0.69406	0.729233	0.533166	0.723166	0.688226	0.693318	0.704906	0.684274	0.697209	0.534676	0.53383	0.693019	0.533257	0.620318	0.534295	0.631415	0.639475	0.618918	0.628122	0.63409	0.623678	0.627336	0.641047	0.605092	0.731057	0.613197	0.634826	0.634613	0.640631	0.618259	0.677945
			CL	0.919467	0.902751	1.03396	0.911469	0.940756	0.918003	0.995346	0.890954	0.909037	1.00262	0.932081	0.945224	0.968582	0.971907	1.00527	0.961048	0.953963	0.792214	0.964384	0.970879	0.924554	0.961913	0.965897	0.978451	0.793723	0.792877	0.974214	0.792304	0.91774	0.793342	0.925509	0.933709	0.916415	0.925611	0.941369	0.921117	0.920729	0.935168	0.908633	0.957445	0.920182	0.929005	0.941887	0.948034	0.913818	1.01914
			PE	0.627155	0.641298	0.769189	0.64006	0.648138	0.625752	0.731116	0.636179	0.636932	0.73844	0.639556	0.679254	0.699242	0.694623	0.741014	0.695314	0.667801	0.520974	0.673466	0.702234	0.658875	0.690887	0.702199	0.711542	0.522483	0.521638	0.702348	0.521064	0.625381	0.522102	0.633036	0.641089	0.624064	0.633182	0.648676	0.628741	0.628298	0.642666	0.616425	0.668846	0.627795	0.636443	0.649199	0.655212	0.621541	0.754606
			VE	0.848106	0.859233	0.876124	0.858054	0.869375	0.844533	0.903644	0.863859	0.854903	0.894253	0.860707	0.965713	0.97354	0.962669	0.929128	0.975455	0.935428	0.780301	0.940858	0.968117	0.944953	0.9657	0.959128	0.972631	0.781811	0.780965	0.96962	0.780391	0.849126	0.781429	0.858765	0.866956	0.847717	0.856992	0.869984	0.852501	0.853987	0.868422	0.837999	0.934847	0.848816	0.862255	0.870502	0.87664	0.846114	0.931463
	Below is imbedded raw data
	Blue_Grid_MDOship
		GHG [kgCO2e/kgNH3]	Destination	Africa											Asia-Pacific																Europe																		Middle East
		Origin		DZ	AO	EG	GQ	LY	MA	MZ	NA	NG	ZA	TN	AU	BN	CN	IN	ID	JP	KZ	KR	MY	PG	PH	SG	TH	TM	UZ	VN	AZ	BE	CZ	DK	FI	FR	DE	IT	NL	NO	PL	PT	RU	ES	SE	TR	UA	GB	IR
		Africa	DZ	0.806776	0.889004	0.85429	0.886974	0.847507	0.835349	0.906391	0.899073	0.883819	0.933763	0.838844	0.970423	0.951892	0.964923	0.907391	0.958919	0.987065	0.819421	0.979464	0.946462	0.985982	0.962864	0.937458	0.950986	0.820931	0.820085	0.947972	0.819511	0.846903	0.820549	0.858174	0.866384	0.845494	0.854779	0.848176	0.850281	0.854063	0.867835	0.830294	0.987562	0.827961	0.861676	0.848659	0.854713	0.844992	0.909738
			AO	0.466386	0.385586	0.493774	0.411651	0.487226	0.46216	0.457276	0.413098	0.410829	0.448332	0.478687	0.533259	0.530501	0.545017	0.510468	0.530462	0.566625	0.395	0.559289	0.524653	0.549204	0.541205	0.520722	0.533556	0.39651	0.395664	0.52939	0.395091	0.474507	0.396129	0.485518	0.493503	0.473111	0.482275	0.487728	0.477858	0.481455	0.495135	0.459146	0.567111	0.466991	0.488884	0.488254	0.494205	0.472671	0.514449
			EG	0.751286	0.813687	0.70403	0.811691	0.737777	0.760379	0.774551	0.818039	0.808545	0.804275	0.741139	0.838238	0.819818	0.832758	0.775597	0.826809	0.854759	0.716532	0.8472	0.81441	0.853695	0.83072	0.805453	0.818902	0.718041	0.717196	0.8159	0.716622	0.771825	0.71766	0.783034	0.791191	0.770419	0.779675	0.742726	0.775197	0.778935	0.792685	0.755314	0.855245	0.745448	0.786504	0.731722	0.738311	0.769932	0.777905
			GQ	0.823459	0.769563	0.851437	0.743546	0.844701	0.818907	0.829883	0.784823	0.763068	0.820525	0.836041	0.907337	0.904531	0.919402	0.88404	0.904469	0.941495	0.756139	0.934018	0.898595	0.923655	0.915479	0.89461	0.907706	0.757649	0.756803	0.903476	0.75623	0.831787	0.757268	0.843021	0.8512	0.830379	0.839648	0.845303	0.835161	0.838917	0.852676	0.816106	0.942018	0.824162	0.846504	0.845822	0.851948	0.829886	0.888191
			LY	0.993324	1.0567	0.986448	1.05462	0.952636	1.00253	1.03903	1.06688	1.05145	1.06904	0.981738	1.10354	1.08486	1.09801	1.03997	1.09193	1.12035	0.967038	1.11269	1.0794	1.11924	1.09593	1.07033	1.08396	0.968548	0.967702	1.08093	0.967129	1.01425	0.968167	1.02561	1.0339	1.01283	1.02216	0.988668	1.01763	1.02148	1.03529	0.99749	1.12086	0.987476	1.02916	0.983642	0.989749	1.01231	1.04237
			MA	1.02024	1.07008	1.04862	1.0678	1.04176	0.991821	1.10134	1.08026	1.06474	1.11505	1.03301	1.16599	1.14726	1.16045	1.10226	1.15435	1.18285	1.00652	1.17517	1.14179	1.18173	1.15836	1.1327	1.14637	1.00803	1.00718	1.14334	1.00661	1.03083	1.00765	1.04221	1.05052	1.02941	1.03875	1.04243	1.03422	1.03808	1.05189	1.0141	1.18336	1.02101	1.04577	1.04294	1.04918	1.02888	1.10467
			MZ	0.682892	0.656595	0.654601	0.670112	0.669492	0.691937	0.583739	0.636939	0.669216	0.62336	0.67281	0.688956	0.678909	0.691741	0.647986	0.679737	0.713575	0.592121	0.706064	0.673528	0.704753	0.689727	0.664626	0.677982	0.593631	0.592785	0.674992	0.592211	0.703254	0.593249	0.714389	0.722481	0.701852	0.711073	0.674377	0.706618	0.710303	0.724027	0.686861	0.714048	0.677067	0.717819	0.663456	0.669983	0.701382	0.651708
			NA	0.489077	0.425981	0.51094	0.439438	0.509929	0.48483	0.450722	0.398077	0.438502	0.441766	0.501387	0.526745	0.523985	0.538512	0.503941	0.523946	0.560133	0.405801	0.552793	0.518135	0.542701	0.534697	0.514202	0.527044	0.407311	0.406465	0.522876	0.405892	0.49719	0.40693	0.508208	0.5162	0.495794	0.504961	0.510435	0.500542	0.504144	0.517827	0.481803	0.56062	0.489685	0.511578	0.510961	0.516917	0.495353	0.507925
			NG	0.801045	0.749551	0.82899	0.743873	0.822265	0.796619	0.809713	0.764673	0.724097	0.800379	0.813611	0.887083	0.88428	0.89913	0.863815	0.884219	0.921195	0.7354	0.913727	0.878349	0.90338	0.895214	0.874367	0.887448	0.73691	0.736064	0.883222	0.735491	0.809358	0.736528	0.820579	0.828747	0.807951	0.817213	0.822861	0.812731	0.816478	0.830232	0.793696	0.921717	0.801743	0.824055	0.82338	0.829496	0.807461	0.867956
			ZA	1.49678	1.43143	1.46973	1.4454	1.48521	1.49199	1.40631	1.41096	1.44454	1.36678	1.48882	1.48995	1.48524	1.50072	1.46212	1.48514	1.52364	1.38402	1.51592	1.47915	1.50691	1.4966	1.47403	1.48798	1.38553	1.38468	1.48428	1.38411	1.50548	1.38515	1.51711	1.52563	1.50406	1.51351	1.49052	1.5089	1.51294	1.52683	1.48918	1.52423	1.49342	1.5208	1.47904	1.48598	1.50347	1.46657
			TN	0.844417	0.907226	0.849661	0.905195	0.841583	0.853551	0.901775	0.9173	0.902039	0.931622	0.812195	0.965819	0.947285	0.960319	0.902773	0.954313	0.982466	0.824175	0.974863	0.941853	0.981383	0.958259	0.932848	0.946379	0.825685	0.824839	0.943364	0.824265	0.865111	0.825303	0.876386	0.884599	0.863702	0.872988	0.845092	0.86849	0.872274	0.886048	0.848496	0.982963	0.838752	0.87989	0.84492	0.850976	0.863199	0.905121
		Asia-Pacific	AU	0.882898	0.870021	0.854363	0.883624	0.869364	0.892002	0.825234	0.850211	0.882734	0.839947	0.872736	0.720516	0.774225	0.782595	0.821069	0.764484	0.792039	0.735352	0.789524	0.77383	0.762918	0.772395	0.772741	0.783777	0.736862	0.736016	0.7791	0.735443	0.903479	0.736481	0.914705	0.922877	0.902072	0.911336	0.874327	0.906852	0.910603	0.924359	0.88694	0.797409	0.877057	0.918184	0.863304	0.869907	0.90158	0.834992
			BN	0.823447	0.826194	0.794983	0.839773	0.809951	0.832534	0.774205	0.806427	0.838881	0.794462	0.813308	0.733439	0.67974	0.721476	0.761497	0.719344	0.739885	0.69407	0.732587	0.706279	0.745364	0.714207	0.71076	0.716816	0.695579	0.694734	0.70948	0.69416	0.843964	0.695198	0.855164	0.863312	0.842558	0.85181	0.814892	0.847335	0.851066	0.864813	0.827468	0.740618	0.81761	0.858628	0.803899	0.81048	0.842073	0.775375
			CN	0.96821	0.972907	0.93953	0.986562	0.954596	0.977349	0.918632	0.953004	0.985676	0.940864	0.958	0.872893	0.852436	0.810089	0.905763	0.861814	0.857246	0.823002	0.848724	0.853913	0.883808	0.843543	0.854591	0.855898	0.824512	0.823666	0.84487	0.823093	0.988921	0.824131	1.0002	1.00842	0.987511	0.996801	0.959606	0.9923	0.996089	1.00986	0.972295	0.856733	0.96236	1.00371	0.948522	0.955171	0.987006	0.919777
			IN	1.10391	1.13098	1.07491	1.14475	1.09012	1.11312	1.06713	1.11088	1.14387	1.09668	1.09359	1.10477	1.08575	1.09894	1.00277	1.09306	1.12134	1.01824	1.11367	1.08028	1.12053	1.09685	1.07119	1.08486	1.01975	1.0189	1.08183	1.01833	1.1249	1.01936	1.13629	1.14462	1.12348	1.13282	1.09523	1.12829	1.13216	1.14598	1.10808	1.12186	1.09804	1.13986	1.08401	1.09076	1.12295	1.04703
			ID	1.02633	1.02203	0.99754	1.03572	1.01266	1.03549	0.970355	1.00206	1.03484	0.989831	1.01608	0.918376	0.913952	0.92555	0.963851	0.874155	0.940348	0.889459	0.937295	0.914177	0.93271	0.914793	0.912804	0.924235	0.890969	0.890123	0.919562	0.889549	1.04714	0.890587	1.05846	1.06671	1.04572	1.05503	1.0177	1.05052	1.05434	1.06813	1.03045	0.945287	1.02047	1.06199	1.00657	1.01325	1.04521	0.977932
			JP	1.01636	1.0211	0.98763	1.03477	1.00272	1.02551	0.966707	1.00117	1.03389	0.988992	1.00613	0.908227	0.896811	0.883051	0.953805	0.902381	0.835695	0.848013	0.864457	0.90006	0.913892	0.886171	0.90266	0.90316	0.849523	0.848677	0.893816	0.848104	1.03711	0.849142	1.0484	1.05664	1.0357	1.04499	1.00774	1.04049	1.04429	1.05807	1.02045	0.868793	1.0105	1.05192	0.996639	1.0033	1.03519	0.967846
			KZ	0.809924	0.806231	0.809808	0.809897	0.81198	0.81232	0.804863	0.804167	0.808339	0.815194	0.809113	0.812639	0.812044	0.810249	0.813241	0.813121	0.809511	0.797406	0.808651	0.810278	0.811387	0.811536	0.808855	0.809575	0.812119	0.811273	0.808376	0.810699	0.805261	0.811737	0.805863	0.804849	0.804406	0.808718	0.807844	0.80753	0.803701	0.81371	0.805635	0.808276	0.80594	0.803787	0.808747	0.806485	0.806474	0.809336
			KR	0.982235	0.987065	0.953555	1.00072	0.968621	0.991373	0.932658	0.967163	0.999834	0.955024	0.972025	0.879358	0.863137	0.84822	0.91979	0.873002	0.838174	0.820904	0.809305	0.866815	0.888542	0.853119	0.868501	0.868868	0.822414	0.821568	0.859486	0.820995	1.00294	0.822033	1.01422	1.02244	1.00153	1.01082	0.973631	1.00632	1.01011	1.02389	0.986319	0.834251	0.976384	1.01773	0.962547	0.969195	1.00103	0.933802
			MY	0.763194	0.765404	0.734824	0.77895	0.74975	0.772259	0.714099	0.745696	0.778057	0.733808	0.753086	0.67848	0.651803	0.668393	0.70146	0.665031	0.688486	0.637879	0.681641	0.625027	0.693022	0.66303	0.650692	0.658958	0.639389	0.638543	0.653122	0.63797	0.783628	0.639008	0.794792	0.80291	0.782224	0.791459	0.754661	0.786995	0.790701	0.804435	0.767187	0.689545	0.757364	0.798239	0.743707	0.750259	0.781747	0.715279
			PG	0.918548	0.906481	0.889979	0.920096	0.904995	0.92766	0.861291	0.886649	0.919207	0.87636	0.908375	0.78294	0.806229	0.813507	0.856659	0.798719	0.817723	0.75409	0.818721	0.808514	0.740273	0.803293	0.807292	0.818289	0.755599	0.754754	0.811567	0.75418	0.939159	0.755218	0.950398	0.958581	0.937751	0.947021	0.90997	0.942534	0.946293	0.960054	0.9226	0.826615	0.912705	0.953883	0.898932	0.905546	0.937257	0.87067
			PH	0.897275	0.900063	0.868707	0.913679	0.883723	0.906387	0.847871	0.880231	0.91279	0.868182	0.887102	0.794172	0.776706	0.775145	0.835086	0.782686	0.791898	0.755979	0.78518	0.780061	0.80504	0.742039	0.783995	0.785099	0.757489	0.756643	0.77585	0.756069	0.917886	0.757107	0.929125	0.937307	0.916478	0.925748	0.888697	0.921261	0.92502	0.938781	0.901327	0.793157	0.891432	0.93261	0.87766	0.884274	0.915984	0.849029
			SG	0.853259	0.860487	0.824729	0.874089	0.839727	0.862361	0.803914	0.840678	0.873199	0.827656	0.843098	0.775926	0.754685	0.767551	0.791157	0.762114	0.789668	0.734755	0.781886	0.749091	0.790423	0.76541	0.723027	0.75362	0.736264	0.735419	0.750599	0.734845	0.873835	0.735883	0.885059	0.893229	0.872428	0.881691	0.844689	0.877208	0.880957	0.894713	0.857299	0.790037	0.847418	0.888537	0.833668	0.84027	0.871937	0.805077
			TH	0.804259	0.811065	0.775829	0.824632	0.790782	0.813337	0.75507	0.791318	0.82374	0.778765	0.794131	0.724791	0.698675	0.706742	0.742387	0.711329	0.727977	0.673492	0.720087	0.695326	0.739183	0.704413	0.691555	0.661201	0.675001	0.674155	0.688361	0.673582	0.824746	0.67462	0.835932	0.84407	0.82334	0.832587	0.795712	0.828115	0.831837	0.84558	0.80827	0.727992	0.798425	0.839391	0.784733	0.791303	0.822859	0.756244
			TM	1.6042	1.60051	1.60408	1.60417	1.60625	1.60659	1.59914	1.59844	1.60261	1.60947	1.60339	1.60691	1.60632	1.60452	1.60752	1.6074	1.60379	1.60488	1.60293	1.60455	1.60566	1.60581	1.60313	1.60385	1.59007	1.60555	1.60265	1.60497	1.59954	1.60601	1.60014	1.59912	1.59868	1.60299	1.60212	1.6018	1.59798	1.60798	1.59991	1.60255	1.60021	1.59806	1.60302	1.60076	1.60075	1.60361
			UZ	0.950436	0.946743	0.95032	0.95041	0.952492	0.952832	0.945376	0.944679	0.948851	0.955706	0.949625	0.953151	0.952557	0.950761	0.953753	0.953633	0.950023	0.951121	0.949163	0.95079	0.951899	0.952048	0.949368	0.950087	0.952631	0.937308	0.948889	0.951212	0.945773	0.952249	0.946375	0.945361	0.944918	0.94923	0.948356	0.948042	0.944213	0.954222	0.946148	0.948788	0.946452	0.944299	0.949259	0.946997	0.946986	0.949849
			VN	0.731709	0.73726	0.703396	0.750786	0.718296	0.74076	0.682702	0.717587	0.749891	0.705744	0.721619	0.65092	0.622254	0.626681	0.670106	0.637549	0.649501	0.603286	0.64159	0.620389	0.663224	0.626092	0.619447	0.619271	0.604796	0.60395	0.592013	0.603377	0.752092	0.604415	0.763235	0.771334	0.750689	0.759914	0.723188	0.755456	0.759147	0.772874	0.735685	0.64951	0.725882	0.76667	0.712259	0.718793	0.750217	0.68389
		Europe	AZ	0.666488	0.662794	0.666372	0.666461	0.668544	0.668884	0.661427	0.660731	0.664902	0.671758	0.665677	0.669203	0.668608	0.666813	0.669805	0.669685	0.666075	0.667173	0.665215	0.666842	0.667951	0.668099	0.665419	0.666139	0.668682	0.667837	0.66494	0.653961	0.661825	0.668301	0.662427	0.661413	0.660969	0.665282	0.664408	0.664094	0.660265	0.670274	0.662199	0.664839	0.662504	0.660351	0.665311	0.663049	0.663038	0.6659
			BE	0.373239	0.422286	0.400538	0.420348	0.394018	0.372203	0.451067	0.432004	0.417237	0.465891	0.385497	0.513539	0.495507	0.508126	0.452271	0.502368	0.529631	0.342086	0.522217	0.490178	0.52863	0.50616	0.481385	0.494557	0.343595	0.342749	0.491594	0.342176	0.333492	0.343214	0.355111	0.363066	0.343966	0.351611	0.394505	0.34727	0.351021	0.364722	0.361042	0.530079	0.373829	0.358459	0.395033	0.400957	0.35234	0.454445
			CZ	0.969879	0.966186	0.969763	0.969852	0.971935	0.972275	0.964818	0.964122	0.968293	0.975149	0.969068	0.972594	0.971999	0.970204	0.973196	0.973076	0.969466	0.970564	0.968606	0.970233	0.971342	0.971491	0.96881	0.96953	0.972074	0.971228	0.968331	0.970654	0.965216	0.95636	0.965818	0.964804	0.964361	0.968673	0.967799	0.967485	0.963656	0.973665	0.96559	0.968231	0.965895	0.963742	0.968702	0.96644	0.966429	0.969291
			DK	0.375078	0.4241	0.402364	0.422165	0.395848	0.374044	0.452866	0.433812	0.419055	0.467688	0.38733	0.515311	0.497288	0.5099	0.454074	0.504147	0.531394	0.333573	0.523984	0.491961	0.530395	0.507935	0.483171	0.496337	0.335083	0.334237	0.493375	0.333664	0.345986	0.334702	0.324489	0.346456	0.3458	0.346487	0.396333	0.347553	0.337699	0.347642	0.362885	0.531841	0.375666	0.341867	0.396861	0.402781	0.354188	0.456245
			FI	0.440968	0.49017	0.468348	0.488216	0.461802	0.439923	0.519039	0.499922	0.4851	0.533877	0.453265	0.581672	0.563589	0.57625	0.520222	0.570467	0.597821	0.390315	0.590388	0.558249	0.596812	0.574275	0.549434	0.562643	0.391825	0.390979	0.559675	0.390406	0.411793	0.391444	0.404285	0.382038	0.41161	0.412285	0.462303	0.413358	0.40327	0.409281	0.428749	0.598274	0.441572	0.394526	0.462829	0.468777	0.420019	0.522414
			FR	0.474852	0.524219	0.502317	0.522247	0.495744	0.473796	0.553183	0.534008	0.519126	0.568035	0.487189	0.61599	0.597851	0.610558	0.554343	0.604748	0.6322	0.444029	0.624746	0.5925	0.631182	0.608572	0.583662	0.59691	0.445539	0.444693	0.593936	0.444119	0.446833	0.445157	0.457855	0.465865	0.436091	0.454596	0.496259	0.45017	0.453787	0.467477	0.462608	0.632658	0.47547	0.461236	0.496785	0.502758	0.453897	0.556554
			DE	0.663259	0.713202	0.691023	0.711169	0.684356	0.662166	0.742497	0.72312	0.708031	0.757398	0.675739	0.805906	0.787574	0.800441	0.743578	0.794535	0.822329	0.627144	0.814802	0.782185	0.821279	0.798419	0.773265	0.786651	0.628654	0.627808	0.783657	0.627234	0.63346	0.628272	0.637518	0.645624	0.633568	0.615579	0.684921	0.635181	0.633412	0.647159	0.650929	0.822806	0.663927	0.640957	0.685443	0.691505	0.642066	0.745856
			IT	0.887459	0.950364	0.884969	0.948321	0.882141	0.896573	0.937191	0.960461	0.945162	0.967075	0.878786	1.00134	0.982774	0.995836	0.938175	0.989813	1.01803	0.85655	1.01041	0.977335	1.01694	0.99377	0.968316	0.981871	0.858059	0.857213	0.978853	0.85664	0.908169	0.857678	0.919464	0.927695	0.906758	0.916055	0.845597	0.91155	0.915349	0.92913	0.891521	1.01853	0.881186	0.922979	0.878925	0.885014	0.906251	0.940535
			NL	0.524878	0.574397	0.552423	0.572409	0.545825	0.523813	0.603449	0.584221	0.569284	0.618314	0.537254	0.666414	0.648225	0.660974	0.604588	0.655139	0.682681	0.492325	0.675208	0.642864	0.681654	0.658979	0.634004	0.647289	0.493835	0.492989	0.644309	0.492416	0.495343	0.493454	0.504829	0.512864	0.495378	0.501437	0.546353	0.481798	0.50064	0.514456	0.512612	0.683144	0.52551	0.508225	0.546878	0.552875	0.503824	0.606817
			NO	0.155762	0.204103	0.182695	0.20224	0.176291	0.154772	0.232478	0.213662	0.19915	0.247242	0.167846	0.29421	0.276414	0.288838	0.233779	0.283197	0.310041	0.116712	0.302716	0.271134	0.309079	0.286916	0.26244	0.275444	0.118221	0.117376	0.272504	0.116802	0.126952	0.11784	0.122815	0.130441	0.12679	0.127507	0.176716	0.128447	0.109503	0.132193	0.143671	0.310466	0.156291	0.125897	0.177249	0.183063	0.135096	0.235871
			PL	1.01356	1.06458	1.04188	1.06243	1.03504	1.0124	1.09449	1.07474	1.05926	1.10948	1.02631	1.15902	1.14033	1.1535	1.09542	1.14741	1.17584	0.968515	1.16818	1.13487	1.17473	1.15141	1.1258	1.13944	0.970024	0.969179	1.13641	0.968605	0.983549	0.969643	0.975273	0.979274	0.983388	0.983939	1.0357	0.985089	0.974788	0.952691	1.00107	1.17636	1.01432	0.974552	1.03621	1.04244	0.992014	1.09783
			PT	0.83364	0.885034	0.861713	0.882954	0.854947	0.832576	0.913813	0.895069	0.879799	0.929606	0.846267	0.977844	0.959314	0.972345	0.914813	0.966341	0.994487	0.81848	0.986886	0.953884	0.993404	0.970286	0.94488	0.958408	0.819989	0.819143	0.955394	0.81857	0.837829	0.819608	0.849099	0.857308	0.83642	0.845705	0.855565	0.841207	0.844988	0.85876	0.809359	0.994983	0.83436	0.8526	0.856082	0.862237	0.835918	0.91716
			RU	0.773121	0.777779	0.7448	0.791308	0.759705	0.782175	0.724102	0.758101	0.790413	0.746252	0.76303	0.671398	0.655537	0.640699	0.7115	0.665159	0.627135	0.605488	0.618975	0.659048	0.680452	0.645553	0.660894	0.661049	0.606997	0.606152	0.651819	0.605578	0.793512	0.606616	0.804658	0.81276	0.792109	0.801336	0.764599	0.796877	0.80057	0.814298	0.777101	0.594296	0.767295	0.808095	0.753666	0.760203	0.791637	0.725289
			ES	0.695185	0.756432	0.715502	0.754447	0.708807	0.703247	0.767152	0.766405	0.751305	0.79684	0.700356	0.830736	0.812348	0.825261	0.768211	0.819328	0.84722	0.68279	0.839673	0.806947	0.846161	0.823229	0.798004	0.81143	0.6843	0.683454	0.80843	0.68288	0.714655	0.683918	0.725842	0.733979	0.71325	0.722496	0.709004	0.718024	0.721746	0.735489	0.698179	0.847703	0.673482	0.7293	0.709908	0.715896	0.712768	0.770508
			SE	0.233349	0.28191	0.260396	0.280024	0.253956	0.232345	0.310412	0.291519	0.276928	0.325195	0.245487	0.372375	0.354506	0.36699	0.311683	0.361313	0.388288	0.186865	0.380935	0.34921	0.387314	0.365055	0.340486	0.353542	0.188375	0.187529	0.350595	0.186956	0.204469	0.187994	0.197075	0.191966	0.204277	0.204996	0.254401	0.206042	0.196046	0.202105	0.221225	0.38872	0.233897	0.179554	0.254932	0.26078	0.21261	0.3138
			TR	0.835782	0.898524	0.821751	0.896498	0.825031	0.844909	0.8738	0.908585	0.893344	0.903625	0.826477	0.93778	0.919266	0.932284	0.874807	0.926288	0.954405	0.805395	0.94681	0.913839	0.953325	0.930228	0.904843	0.918359	0.806904	0.806059	0.915346	0.805485	0.856451	0.806523	0.867714	0.875918	0.855042	0.864324	0.826786	0.859828	0.863605	0.877374	0.839853	0.954899	0.829935	0.871213	0.793724	0.818713	0.854542	0.877148
			UA	0.555581	0.617316	0.542358	0.615385	0.545025	0.564695	0.59346	0.627174	0.612258	0.62296	0.546416	0.656502	0.638288	0.651057	0.59459	0.64521	0.672795	0.517592	0.665313	0.632922	0.671765	0.649058	0.624052	0.637354	0.519101	0.518255	0.634372	0.517682	0.575928	0.51872	0.587014	0.595064	0.574528	0.583727	0.546715	0.579287	0.582937	0.596644	0.559612	0.673261	0.549764	0.590419	0.532828	0.507911	0.57407	0.596827
			GB	0.463501	0.51284	0.490952	0.510871	0.484384	0.462447	0.541788	0.522623	0.507752	0.556638	0.475832	0.604565	0.586436	0.599136	0.542953	0.59333	0.620765	0.43521	0.613315	0.581087	0.619749	0.597151	0.572253	0.585495	0.43672	0.435874	0.582521	0.4353	0.444349	0.436338	0.455382	0.463387	0.443001	0.452126	0.484897	0.447702	0.451315	0.465003	0.451261	0.621223	0.464117	0.45876	0.485422	0.491391	0.425577	0.54516
		Middle East	IR	0.782291	0.810611	0.753836	0.824188	0.768801	0.791376	0.747573	0.790847	0.823297	0.777119	0.772155	0.794764	0.776088	0.789005	0.724163	0.783286	0.810972	0.692084	0.803422	0.770685	0.810279	0.786972	0.76174	0.775169	0.693594	0.692748	0.772169	0.692175	0.802801	0.693212	0.813997	0.822143	0.801395	0.810646	0.773738	0.806171	0.8099	0.823646	0.78631	0.811455	0.776456	0.817461	0.762749	0.769327	0.800911	0.679981
			IQ	1.07811	1.10698	1.04917	1.12073	1.06435	1.08731	1.04288	1.08691	1.11985	1.07276	1.06781	1.09075	1.07176	1.08493	1.01895	1.07907	1.10729	0.986748	1.09963	1.0663	1.10656	1.08284	1.05722	1.07087	0.988257	0.987411	1.06784	0.986838	1.09905	0.987876	1.11043	1.11874	1.09764	1.10698	1.06945	1.10244	1.1063	1.12011	1.08227	1.10781	1.07224	1.11399	1.05825	1.06498	1.09711	0.994484
			IL	0.492622	0.554057	0.465103	0.552147	0.479529	0.501647	0.516003	0.558822	0.549025	0.545434	0.482747	0.578843	0.560694	0.57341	0.517159	0.567594	0.595066	0.45697	0.587608	0.555341	0.594046	0.571422	0.546498	0.559754	0.45848	0.457634	0.556779	0.457061	0.512814	0.458098	0.523863	0.531881	0.511416	0.520598	0.483929	0.516169	0.519793	0.533486	0.496558	0.595525	0.486812	0.527249	0.472743	0.479182	0.510968	0.519374
			KW	0.699709	0.727876	0.671389	0.741406	0.686293	0.708763	0.665132	0.708197	0.740512	0.694587	0.689618	0.712136	0.693545	0.706393	0.641873	0.700715	0.728251	0.610646	0.720734	0.68816	0.72757	0.704375	0.679251	0.69262	0.612155	0.61131	0.689628	0.610736	0.720099	0.611774	0.731245	0.739347	0.718696	0.727923	0.691188	0.723464	0.727157	0.740885	0.703688	0.728726	0.693883	0.734682	0.680254	0.686791	0.718224	0.6185
			OM	0.590609	0.618592	0.56245	0.632065	0.577281	0.599624	0.556201	0.599014	0.631167	0.585546	0.58057	0.603161	0.584674	0.597437	0.534278	0.591808	0.619166	0.513529	0.611686	0.57931	0.618433	0.595439	0.570443	0.58374	0.515039	0.514193	0.580758	0.513619	0.610854	0.514657	0.621939	0.629989	0.609455	0.618653	0.582124	0.614213	0.617863	0.631569	0.59454	0.619631	0.584793	0.625344	0.571259	0.577745	0.608997	0.531396
			QA	0.566487	0.594412	0.53838	0.607867	0.553188	0.57549	0.532134	0.574867	0.606967	0.561443	0.556466	0.57884	0.560386	0.573122	0.509113	0.567509	0.594809	0.4817	0.587342	0.555028	0.594147	0.57113	0.546175	0.559449	0.48321	0.482364	0.556471	0.48179	0.586687	0.482828	0.597752	0.605785	0.585288	0.594477	0.558014	0.590043	0.593679	0.607379	0.570403	0.595271	0.560674	0.601147	0.547171	0.55364	0.584835	0.493843
			SA	0.693989	0.756137	0.665608	0.754163	0.680539	0.703056	0.69901	0.742325	0.751023	0.728658	0.683877	0.762479	0.744128	0.757011	0.700084	0.751096	0.778923	0.650283	0.771389	0.738735	0.77787	0.754985	0.729807	0.743206	0.651793	0.650947	0.740211	0.650373	0.714432	0.651411	0.7256	0.733722	0.713028	0.722265	0.685453	0.717799	0.721508	0.735244	0.697985	0.779402	0.688158	0.729049	0.674495	0.68105	0.71255	0.702368
			AE	0.614947	0.642963	0.58676	0.656446	0.601604	0.623969	0.58051	0.623367	0.655548	0.609874	0.6049	0.627328	0.608823	0.621601	0.557417	0.615963	0.643352	0.530122	0.635866	0.603455	0.642683	0.619599	0.59458	0.60789	0.531632	0.530786	0.604907	0.530212	0.635218	0.53125	0.646314	0.654372	0.633818	0.643021	0.606456	0.638578	0.642235	0.655945	0.618887	0.643818	0.609129	0.649724	0.595579	0.602074	0.633358	0.543733
		North America	CA	0.463325	0.498359	0.490745	0.496512	0.484186	0.461045	0.541517	0.508128	0.493394	0.542049	0.475641	0.604231	0.586121	0.598804	0.54269	0.593009	0.591008	0.414874	0.596303	0.580777	0.600369	0.596824	0.571951	0.585179	0.416384	0.415538	0.582207	0.414965	0.454609	0.416003	0.460052	0.468047	0.453294	0.460938	0.484694	0.457961	0.45533	0.469671	0.45162	0.590412	0.463936	0.463424	0.48522	0.49118	0.450292	0.54489
			MX	0.703476	0.725718	0.731222	0.723972	0.72456	0.700857	0.770669	0.731277	0.720836	0.761468	0.715948	0.801482	0.809907	0.798444	0.783747	0.811133	0.771463	0.612625	0.776832	0.81349	0.780913	0.801458	0.813412	0.818168	0.614134	0.613288	0.805591	0.612715	0.698547	0.613753	0.704944	0.713046	0.697226	0.705806	0.725123	0.701912	0.700192	0.714584	0.691931	0.770875	0.704141	0.70838	0.725645	0.731702	0.694447	0.786021
			TT	0.621107	0.63204	0.648756	0.630925	0.642125	0.617613	0.675849	0.636579	0.627794	0.666718	0.633533	0.7372	0.744915	0.734165	0.701108	0.746819	0.707275	0.554504	0.712622	0.739541	0.716698	0.737173	0.730652	0.743985	0.556014	0.555168	0.740999	0.554595	0.622053	0.555633	0.631574	0.639644	0.620652	0.629862	0.642671	0.625414	0.62683	0.641207	0.611077	0.706685	0.621756	0.634991	0.643194	0.649223	0.619096	0.70336
			US	0.756785	0.779493	0.78462	0.777713	0.77793	0.754133	0.825859	0.78586	0.774572	0.816595	0.769299	0.857496	0.865951	0.854457	0.837303	0.867177	0.827391	0.667114	0.832779	0.869551	0.836865	0.857476	0.867078	0.874247	0.668624	0.667778	0.861633	0.667205	0.751838	0.668242	0.758254	0.766385	0.750516	0.75911	0.778508	0.755206	0.753493	0.767899	0.7452	0.826805	0.757465	0.761708	0.779028	0.785112	0.747721	0.839596
		South America	AR	0.736339	0.710718	0.764122	0.71771	0.757448	0.732534	0.729932	0.699878	0.715519	0.720712	0.748828	0.792825	0.804104	0.818856	0.783767	0.80405	0.809686	0.633569	0.815412	0.798198	0.774363	0.809233	0.79423	0.807239	0.635078	0.634233	0.803031	0.633659	0.744178	0.634697	0.755338	0.763453	0.742774	0.752008	0.758017	0.747545	0.751248	0.764981	0.728825	0.818263	0.73701	0.758782	0.758538	0.764606	0.742166	0.78786
			BO	0.493259	0.489565	0.493143	0.493232	0.495315	0.495654	0.488198	0.487502	0.491673	0.498528	0.492447	0.495973	0.495379	0.493584	0.496576	0.496455	0.492845	0.493943	0.491986	0.493613	0.494721	0.49487	0.49219	0.492909	0.495453	0.494607	0.491711	0.494034	0.488595	0.495072	0.489198	0.488184	0.48774	0.492052	0.491178	0.490864	0.487036	0.497044	0.48897	0.49161	0.489275	0.487122	0.492082	0.48982	0.489808	0.492671
			BR	0.612554	0.591509	0.64017	0.596432	0.633549	0.608769	0.620334	0.586009	0.593898	0.61123	0.624964	0.696884	0.694108	0.708761	0.673899	0.69406	0.729233	0.533166	0.723166	0.688226	0.693318	0.704906	0.684274	0.697209	0.534676	0.53383	0.693019	0.533257	0.620318	0.534295	0.631415	0.639475	0.618918	0.628122	0.63409	0.623678	0.627336	0.641047	0.605092	0.731057	0.613197	0.634826	0.634613	0.640631	0.618259	0.677945
			CL	0.919467	0.902751	1.03396	0.911469	0.940756	0.918003	0.995346	0.890954	0.909037	1.00262	0.932081	0.945224	0.968582	0.971907	1.00527	0.961048	0.953963	0.792214	0.964384	0.970879	0.924554	0.961913	0.965897	0.978451	0.793723	0.792877	0.974214	0.792304	0.91774	0.793342	0.925509	0.933709	0.916415	0.925611	0.941369	0.921117	0.920729	0.935168	0.908633	0.957445	0.920182	0.929005	0.941887	0.948034	0.913818	1.01914
			PE	0.627155	0.641298	0.769189	0.64006	0.648138	0.625752	0.731116	0.636179	0.636932	0.73844	0.639556	0.679254	0.699242	0.694623	0.741014	0.695314	0.667801	0.520974	0.673466	0.702234	0.658875	0.690887	0.702199	0.711542	0.522483	0.521638	0.702348	0.521064	0.625381	0.522102	0.633036	0.641089	0.624064	0.633182	0.648676	0.628741	0.628298	0.642666	0.616425	0.668846	0.627795	0.636443	0.649199	0.655212	0.621541	0.754606
			VE	0.848106	0.859233	0.876124	0.858054	0.869375	0.844533	0.903644	0.863859	0.854903	0.894253	0.860707	0.965713	0.97354	0.962669	0.929128	0.975455	0.935428	0.780301	0.940858	0.968117	0.944953	0.9657	0.959128	0.972631	0.781811	0.780965	0.96962	0.780391	0.849126	0.781429	0.858765	0.866956	0.847717	0.856992	0.869984	0.852501	0.853987	0.868422	0.837999	0.934847	0.848816	0.862255	0.870502	0.87664	0.846114	0.931463
	Blue_Grid_MDONH3ship
		GHG [kgCO2e/kgNH3]	Destination	Africa											Asia-Pacific																Europe																		Middle East
		Origin		DZ	AO	EG	GQ	LY	MA	MZ	NA	NG	ZA	TN	AU	BN	CN	IN	ID	JP	KZ	KR	MY	PG	PH	SG	TH	TM	UZ	VN	AZ	BE	CZ	DK	FI	FR	DE	IT	NL	NO	PL	PT	RU	ES	SE	TR	UA	GB	IR
		Africa	DZ	0.806776	0.882524	0.851172	0.880995	0.845176	0.834115	0.898265	0.891528	0.87798	0.924141	0.837022	0.957359	0.940403	0.952132	0.899912	0.946907	0.972267	0.819421	0.965257	0.935294	0.971444	0.950367	0.926956	0.939359	0.820931	0.820085	0.936505	0.819511	0.844034	0.820549	0.854368	0.861769	0.842674	0.851522	0.845422	0.847315	0.850429	0.86387	0.828916	0.972611	0.826816	0.857381	0.845942	0.851266	0.842397	0.90171
			AO	0.459906	0.385586	0.484819	0.410095	0.479055	0.456276	0.451161	0.410896	0.409207	0.443951	0.471027	0.521005	0.518442	0.53149	0.50032	0.518504	0.551088	0.395	0.544334	0.512961	0.535403	0.528137	0.509255	0.521	0.39651	0.395664	0.517101	0.395091	0.466876	0.396129	0.476951	0.484126	0.465529	0.474257	0.47914	0.47013	0.473058	0.486408	0.452932	0.551419	0.460098	0.479827	0.4797	0.484912	0.465315	0.50359
			EG	0.748168	0.804732	0.70403	0.803235	0.736034	0.756669	0.768931	0.808517	0.80023	0.796942	0.738846	0.827681	0.810835	0.822474	0.770624	0.817303	0.842467	0.716532	0.835499	0.805748	0.841662	0.820729	0.797457	0.809782	0.718041	0.717196	0.806938	0.716622	0.766481	0.71766	0.776753	0.7841	0.765123	0.773943	0.74018	0.769755	0.772825	0.786245	0.751461	0.842801	0.742494	0.779733	0.730228	0.736035	0.764862	0.772384
			GQ	0.817479	0.768007	0.842982	0.743546	0.837031	0.813539	0.822891	0.781741	0.76227	0.815268	0.828881	0.894206	0.891596	0.904999	0.873015	0.891634	0.925081	0.756139	0.918187	0.886027	0.908977	0.901534	0.882267	0.894274	0.757649	0.756803	0.890311	0.75623	0.824662	0.757268	0.83496	0.842329	0.823303	0.832135	0.837215	0.827939	0.831027	0.844456	0.810396	0.92545	0.817769	0.837953	0.837768	0.843155	0.823036	0.876456
			LY	0.990992	1.04853	0.984705	1.04695	0.952636	0.999606	1.03228	1.05764	1.04392	1.06057	0.980344	1.09185	1.07474	1.0866	1.03386	1.0813	1.10693	0.967038	1.09986	1.0696	1.10608	1.0848	1.0612	1.07371	0.968548	0.967702	1.07084	0.967129	1.00969	0.968167	1.02011	1.02759	1.00832	1.01721	0.986561	1.01298	1.01616	1.02963	0.994422	1.10729	0.985307	1.02317	0.982051	0.987429	1.00802	1.03572
			MA	1.01901	1.06419	1.04491	1.06243	1.03883	0.991821	1.09262	1.07331	1.05951	1.10604	1.0306	1.15233	1.13518	1.14707	1.09419	1.14175	1.16746	1.00652	1.16037	1.13003	1.1666	1.14527	1.12161	1.13415	1.00803	1.00718	1.13128	1.00661	1.02827	1.00765	1.03872	1.04622	1.0269	1.0358	1.03908	1.03156	1.03475	1.04824	1.01303	1.16782	1.01936	1.04179	1.03963	1.04514	1.0266	1.09606
			MZ	0.674765	0.65048	0.648981	0.66312	0.66274	0.68322	0.583739	0.632388	0.662166	0.620999	0.665508	0.680532	0.671325	0.682856	0.64326	0.672175	0.702683	0.592121	0.695763	0.666266	0.694812	0.681136	0.658029	0.670261	0.593631	0.592785	0.667431	0.592211	0.692902	0.593249	0.703099	0.710382	0.691548	0.700333	0.666823	0.696168	0.699185	0.712578	0.678001	0.703004	0.669104	0.70604	0.656954	0.662699	0.691305	0.646304
			NA	0.481532	0.423779	0.501418	0.436355	0.500694	0.477882	0.446171	0.398077	0.435363	0.438951	0.492662	0.516056	0.513491	0.52655	0.495357	0.513553	0.546161	0.405801	0.539404	0.508008	0.530465	0.523194	0.504301	0.516053	0.407311	0.406465	0.512152	0.405892	0.488496	0.40693	0.498577	0.505759	0.487148	0.495879	0.500782	0.491751	0.494684	0.508036	0.474526	0.546493	0.481727	0.501457	0.501342	0.506559	0.486933	0.498632
			NG	0.795205	0.747928	0.820675	0.743075	0.814734	0.791381	0.802662	0.761535	0.724097	0.795063	0.806591	0.873894	0.871286	0.884668	0.852731	0.871325	0.904723	0.7354	0.897837	0.865722	0.888643	0.88121	0.861965	0.873957	0.73691	0.736064	0.869997	0.735491	0.802373	0.736528	0.812658	0.820016	0.801015	0.809841	0.814913	0.805649	0.808727	0.822152	0.788126	0.905089	0.79549	0.815644	0.815466	0.820843	0.800751	0.856162
			ZA	1.48716	1.42705	1.46239	1.44014	1.47675	1.48298	1.40395	1.40814	1.43922	1.36678	1.4798	1.48114	1.47678	1.49079	1.45573	1.47678	1.5117	1.38402	1.50457	1.47106	1.49655	1.48713	1.46625	1.47907	1.38553	1.38468	1.47559	1.38411	1.49473	1.38515	1.50542	1.51313	1.49335	1.50236	1.48125	1.49804	1.50141	1.51498	1.47984	1.51213	1.48375	1.50862	1.47083	1.47699	1.49298	1.45946
			TN	0.842594	0.899566	0.847367	0.898035	0.840189	0.851136	0.894473	0.908575	0.895019	0.922607	0.812195	0.95358	0.93662	0.948353	0.896119	0.943126	0.968492	0.824175	0.961481	0.93151	0.967668	0.946587	0.92317	0.935577	0.825685	0.824839	0.932722	0.824265	0.861062	0.825303	0.8714	0.878804	0.859701	0.868552	0.843027	0.864343	0.86746	0.880903	0.845938	0.968837	0.837077	0.874414	0.842949	0.848275	0.859424	0.897918
		Asia-Pacific	AU	0.869834	0.857767	0.843806	0.870494	0.857675	0.878347	0.81681	0.839522	0.869545	0.831136	0.860497	0.720516	0.770934	0.778408	0.813752	0.762148	0.786953	0.735352	0.784584	0.770418	0.760567	0.769221	0.7693	0.779425	0.736862	0.736016	0.775056	0.735443	0.888189	0.736481	0.898479	0.905841	0.886831	0.895658	0.861836	0.891465	0.894547	0.907973	0.873142	0.79174	0.864157	0.901468	0.851865	0.857686	0.886565	0.826102
			BN	0.811957	0.814135	0.785999	0.826837	0.799837	0.820452	0.766622	0.795933	0.825887	0.786001	0.802643	0.730149	0.67974	0.719032	0.755778	0.717343	0.735748	0.69407	0.729019	0.705182	0.740908	0.71252	0.70914	0.714725	0.695579	0.694734	0.707932	0.69416	0.830248	0.695198	0.840511	0.84785	0.828891	0.837707	0.803975	0.833522	0.836585	0.850001	0.815243	0.736307	0.806284	0.843486	0.794033	0.799833	0.828632	0.768084
			CN	0.95542	0.95938	0.929245	0.972159	0.943181	0.963966	0.909747	0.941042	0.971214	0.930935	0.946034	0.868705	0.849992	0.810089	0.898743	0.858641	0.854157	0.823002	0.846308	0.851185	0.878553	0.841835	0.851678	0.852934	0.824512	0.823666	0.842768	0.823093	0.973904	0.824131	0.984248	0.991657	0.972543	0.981396	0.947388	0.977186	0.980307	0.993752	0.95877	0.853581	0.949733	0.987266	0.937356	0.943222	0.972264	0.911184
			IN	1.09643	1.12083	1.06994	1.13372	1.08402	1.10505	1.0624	1.1023	1.13279	1.09029	1.08694	1.09745	1.08003	1.09192	1.00277	1.0868	1.11231	1.01824	1.10523	1.07488	1.11174	1.09012	1.06646	1.079	1.01975	1.0189	1.07613	1.01833	1.11519	1.01936	1.12565	1.13316	1.11382	1.12273	1.08832	1.11848	1.12169	1.13518	1.09987	1.11268	1.09072	1.12873	1.07816	1.08412	1.11352	1.04444
			ID	1.01432	1.01007	0.988034	1.02289	1.00202	1.02289	0.962793	0.991664	1.02194	0.98147	1.0049	0.916039	0.911951	0.922378	0.957591	0.874155	0.935817	0.889459	0.932956	0.912001	0.929011	0.912674	0.910625	0.921118	0.890969	0.890123	0.916749	0.889549	1.0329	0.890587	1.04328	1.05073	1.03154	1.04041	1.00626	1.03618	1.03934	1.05279	1.0177	0.940216	1.00862	1.04632	0.996183	1.00208	1.03125	0.970099
			JP	1.00156	1.00556	0.975338	1.01836	0.989294	1.01012	0.955815	0.987196	1.01741	0.977052	0.992157	0.903141	0.892674	0.879962	0.944777	0.89785	0.835695	0.848013	0.862859	0.895483	0.9082	0.882922	0.89773	0.89825	0.849523	0.848677	0.88962	0.848104	1.02008	0.849142	1.03044	1.03787	1.01872	1.02758	0.993516	1.02337	1.0265	1.03995	1.00492	0.866782	0.995868	1.03347	0.983464	0.989345	1.01844	0.957246
			KZ	0.809924	0.806231	0.809808	0.809897	0.81198	0.81232	0.804863	0.804167	0.808339	0.815194	0.809113	0.812639	0.812044	0.810249	0.813241	0.813121	0.809511	0.797406	0.808651	0.810278	0.811387	0.811536	0.808855	0.809575	0.812119	0.811273	0.808376	0.810699	0.805261	0.811737	0.805863	0.804849	0.804406	0.808718	0.807844	0.80753	0.803701	0.81371	0.805635	0.808276	0.80594	0.803787	0.808747	0.806485	0.806474	0.809336
			KR	0.968028	0.972111	0.941854	0.984889	0.955789	0.976574	0.922357	0.953773	0.983944	0.943667	0.958642	0.874419	0.859569	0.845804	0.911354	0.868662	0.836576	0.820904	0.809305	0.862769	0.882686	0.850386	0.864182	0.86458	0.822414	0.821568	0.855917	0.820995	0.986511	0.822033	0.996855	1.00426	0.98515	0.994003	0.959996	0.989793	0.992914	1.00636	0.971377	0.832889	0.962341	0.999872	0.949964	0.955831	0.984871	0.923794
			MY	0.752026	0.753712	0.726162	0.766382	0.739957	0.760499	0.706837	0.735569	0.76543	0.725714	0.742743	0.675068	0.650706	0.665665	0.696063	0.662855	0.683909	0.637879	0.677595	0.625027	0.688209	0.660891	0.64941	0.657007	0.639389	0.638543	0.651582	0.63797	0.770234	0.639008	0.780461	0.78777	0.768878	0.777677	0.744065	0.773503	0.776541	0.789945	0.755285	0.684764	0.74636	0.783418	0.734163	0.739933	0.768628	0.70831
			PG	0.904009	0.892679	0.877947	0.905418	0.891832	0.912529	0.85135	0.874413	0.90447	0.866002	0.894661	0.780589	0.801773	0.808251	0.847865	0.79502	0.812031	0.75409	0.812865	0.803701	0.740273	0.799051	0.802461	0.812553	0.755599	0.754754	0.806317	0.75418	0.922394	0.755218	0.932696	0.940069	0.921035	0.929869	0.896003	0.925671	0.928762	0.942193	0.907326	0.820031	0.89833	0.935692	0.886018	0.89185	0.920766	0.860297
			PH	0.884778	0.886995	0.858716	0.899734	0.872601	0.893298	0.83928	0.868728	0.898786	0.858712	0.87543	0.790998	0.775019	0.773437	0.828359	0.780567	0.788649	0.755979	0.782447	0.777923	0.800798	0.742039	0.781384	0.782455	0.757489	0.756643	0.773915	0.756069	0.903163	0.757107	0.913465	0.920838	0.901804	0.910637	0.876772	0.90644	0.909531	0.922961	0.888095	0.789688	0.879099	0.91646	0.866787	0.872619	0.901535	0.84073
			SG	0.842756	0.849021	0.816732	0.861747	0.830599	0.851267	0.797318	0.830777	0.860798	0.819877	0.83342	0.772485	0.753066	0.764638	0.786425	0.759934	0.784738	0.734755	0.777567	0.747809	0.785593	0.7628	0.723027	0.751877	0.736264	0.735419	0.749017	0.734845	0.861106	0.735883	0.871394	0.878754	0.859748	0.868575	0.834758	0.864382	0.867462	0.880888	0.846062	0.784966	0.837079	0.874382	0.824789	0.830609	0.859482	0.798772
			TH	0.792632	0.798508	0.766708	0.811199	0.78053	0.801119	0.74735	0.780327	0.810248	0.769861	0.783329	0.72044	0.696584	0.703777	0.736531	0.708213	0.723067	0.673492	0.715799	0.693375	0.733447	0.701769	0.689812	0.661201	0.675001	0.674155	0.686858	0.673582	0.810893	0.67462	0.821143	0.828471	0.809536	0.818346	0.784657	0.814165	0.817219	0.830631	0.795908	0.722971	0.786961	0.824111	0.77473	0.780519	0.80928	0.748815
			TM	1.6042	1.60051	1.60408	1.60417	1.60625	1.60659	1.59914	1.59844	1.60261	1.60947	1.60339	1.60691	1.60632	1.60452	1.60752	1.6074	1.60379	1.60488	1.60293	1.60455	1.60566	1.60581	1.60313	1.60385	1.59007	1.60555	1.60265	1.60497	1.59954	1.60601	1.60014	1.59912	1.59868	1.60299	1.60212	1.6018	1.59798	1.60798	1.59991	1.60255	1.60021	1.59806	1.60302	1.60076	1.60075	1.60361
			UZ	0.950436	0.946743	0.95032	0.95041	0.952492	0.952832	0.945376	0.944679	0.948851	0.955706	0.949625	0.953151	0.952557	0.950761	0.953753	0.953633	0.950023	0.951121	0.949163	0.95079	0.951899	0.952048	0.949368	0.950087	0.952631	0.937308	0.948889	0.951212	0.945773	0.952249	0.946375	0.945361	0.944918	0.94923	0.948356	0.948042	0.944213	0.954222	0.946148	0.948788	0.946452	0.944299	0.949259	0.946997	0.946986	0.949849
			VN	0.720241	0.724971	0.694434	0.73762	0.708204	0.728701	0.675141	0.706863	0.736666	0.697053	0.710977	0.646876	0.620706	0.624579	0.664409	0.634736	0.645305	0.603286	0.638021	0.618849	0.657974	0.624157	0.617865	0.617768	0.604796	0.60395	0.592013	0.603377	0.738398	0.604415	0.748604	0.755894	0.737044	0.745833	0.712293	0.741665	0.744688	0.758085	0.723483	0.645203	0.714579	0.75155	0.702415	0.708167	0.736798	0.67662
		Europe	AZ	0.666488	0.662794	0.666372	0.666461	0.668544	0.668884	0.661427	0.660731	0.664902	0.671758	0.665677	0.669203	0.668608	0.666813	0.669805	0.669685	0.666075	0.667173	0.665215	0.666842	0.667951	0.668099	0.665419	0.666139	0.668682	0.667837	0.66494	0.653961	0.661825	0.668301	0.662427	0.661413	0.660969	0.665282	0.664408	0.664094	0.660265	0.670274	0.662199	0.664839	0.662504	0.660351	0.665311	0.663049	0.663038	0.6659
			BE	0.37037	0.414655	0.395194	0.413224	0.389458	0.369644	0.440714	0.42331	0.410253	0.455133	0.381449	0.498249	0.481791	0.493109	0.442566	0.48813	0.512606	0.342086	0.505784	0.476784	0.511865	0.491436	0.468656	0.480704	0.343595	0.342749	0.4779	0.342176	0.333492	0.343214	0.353512	0.360658	0.343242	0.350586	0.389528	0.34653	0.349597	0.362964	0.358888	0.512902	0.370547	0.35637	0.39009	0.395275	0.351047	0.444191
			CZ	0.969879	0.966186	0.969763	0.969852	0.971935	0.972275	0.964818	0.964122	0.968293	0.975149	0.969068	0.972594	0.971999	0.970204	0.973196	0.973076	0.969466	0.970564	0.968606	0.970233	0.971342	0.971491	0.96881	0.96953	0.972074	0.971228	0.968331	0.970654	0.965216	0.95636	0.965818	0.964804	0.964361	0.968673	0.967799	0.967485	0.963656	0.973665	0.96559	0.968231	0.965895	0.963742	0.968702	0.96644	0.966429	0.969291
			DK	0.371272	0.415533	0.396083	0.414104	0.390352	0.370549	0.441577	0.424181	0.411133	0.455994	0.382345	0.499085	0.482635	0.493946	0.443432	0.488972	0.513433	0.333573	0.506614	0.47763	0.512693	0.492275	0.469506	0.481548	0.335083	0.334237	0.478744	0.333664	0.344387	0.334702	0.324489	0.344778	0.344141	0.345156	0.39042	0.346017	0.336708	0.346657	0.359794	0.513728	0.371448	0.340507	0.390981	0.396162	0.351958	0.445054
			FI	0.436353	0.480793	0.461257	0.479344	0.455496	0.435617	0.50694	0.489481	0.476369	0.521372	0.44747	0.564636	0.548126	0.559487	0.508771	0.554483	0.57905	0.390315	0.572209	0.543109	0.578301	0.557805	0.534959	0.547044	0.391825	0.390979	0.544235	0.390406	0.409385	0.391444	0.402607	0.382038	0.409141	0.410143	0.45558	0.411013	0.401489	0.40786	0.424848	0.579351	0.436544	0.393539	0.45614	0.461349	0.416979	0.510414
			FR	0.472031	0.516637	0.497022	0.515171	0.491233	0.471285	0.542879	0.525363	0.512191	0.557326	0.483189	0.600749	0.584184	0.59559	0.544687	0.590559	0.615224	0.444029	0.608362	0.579155	0.614465	0.593898	0.570982	0.583106	0.445539	0.444693	0.580291	0.444119	0.446109	0.445157	0.456196	0.463396	0.436091	0.453486	0.491331	0.449351	0.452299	0.465659	0.460501	0.61553	0.472237	0.459087	0.491891	0.497125	0.452648	0.54635
			DE	0.660003	0.705183	0.685291	0.703656	0.679408	0.659219	0.731756	0.714038	0.700659	0.746252	0.671303	0.790228	0.773471	0.785036	0.733486	0.779909	0.804916	0.627144	0.797981	0.768402	0.804126	0.783308	0.760148	0.77241	0.628654	0.627808	0.769575	0.627234	0.632435	0.628272	0.636186	0.643483	0.632458	0.615579	0.679557	0.634205	0.632253	0.645668	0.648386	0.805241	0.660257	0.639136	0.680112	0.685435	0.640384	0.735215
			IT	0.884706	0.941776	0.882424	0.940233	0.880034	0.89323	0.929637	0.950808	0.937215	0.957808	0.876721	0.988851	0.971856	0.983618	0.931269	0.978374	1.0038	0.85655	0.996777	0.96674	1.00297	0.981845	0.958385	0.970816	0.858059	0.857213	0.967958	0.85664	0.903192	0.857678	0.913551	0.920972	0.90183	0.91069	0.845597	0.906476	0.909607	0.923057	0.888036	1.00415	0.878633	0.916576	0.876816	0.882173	0.901548	0.93308
			NL	0.521912	0.566669	0.546981	0.565187	0.541168	0.521156	0.592999	0.575429	0.562203	0.607458	0.533108	0.651027	0.634412	0.64586	0.594786	0.640803	0.665559	0.492325	0.658677	0.629372	0.664792	0.644158	0.621178	0.633338	0.493835	0.492989	0.630518	0.492416	0.494603	0.493454	0.503294	0.510519	0.494558	0.500461	0.541279	0.481798	0.499286	0.512761	0.51036	0.66587	0.522131	0.5062	0.541837	0.547095	0.502434	0.596466
			NO	0.152127	0.195707	0.176585	0.19435	0.170966	0.151448	0.22136	0.204202	0.1914	0.235718	0.163031	0.278154	0.261933	0.273055	0.223308	0.268194	0.29225	0.116712	0.285518	0.256974	0.291549	0.271427	0.248946	0.260825	0.118221	0.117376	0.258045	0.116802	0.125527	0.11784	0.121824	0.128659	0.125302	0.126348	0.170974	0.127093	0.109503	0.131062	0.140751	0.292524	0.152244	0.124434	0.17154	0.176615	0.133037	0.224852
			PL	1.0096	1.05585	1.03544	1.05421	1.02938	1.00874	1.08304	1.06495	1.05118	1.09763	1.02116	1.14264	1.12552	1.13738	1.08462	1.13208	1.15772	0.968515	1.15065	1.12038	1.15687	1.13559	1.11197	1.12449	0.970024	0.969179	1.12162	0.968605	0.981791	0.969643	0.974288	0.977853	0.98157	0.982448	1.02962	0.983395	0.973657	0.952691	0.99782	1.15808	1.00994	0.973449	1.03017	1.03566	0.989624	1.08648
			PT	0.832263	0.87882	0.85786	0.877244	0.851879	0.831502	0.904952	0.887792	0.87423	0.920265	0.84371	0.964046	0.94709	0.95882	0.9066	0.953595	0.978954	0.81848	0.971944	0.941981	0.97813	0.957054	0.933643	0.946046	0.819989	0.819143	0.943192	0.81857	0.835675	0.819608	0.846007	0.853407	0.834314	0.843162	0.85208	0.838955	0.842068	0.855509	0.809359	0.979298	0.832569	0.849019	0.852631	0.858046	0.834038	0.908398
			RU	0.758171	0.762086	0.732356	0.774739	0.746129	0.766633	0.713058	0.743973	0.773785	0.734157	0.748904	0.665729	0.651225	0.637547	0.70232	0.660088	0.625123	0.605488	0.617612	0.654267	0.673867	0.642084	0.655823	0.656028	0.606997	0.606152	0.647512	0.605578	0.776335	0.606616	0.786545	0.793837	0.774981	0.783771	0.750221	0.779603	0.782628	0.796025	0.761415	0.594296	0.752508	0.789492	0.74034	0.746095	0.774735	0.714537
			ES	0.694039	0.749539	0.712548	0.748054	0.706638	0.7016	0.759189	0.758447	0.745052	0.787164	0.698681	0.817836	0.801022	0.812634	0.760896	0.80748	0.832585	0.68279	0.82563	0.795943	0.831786	0.810895	0.787665	0.799967	0.6843	0.683454	0.797127	0.68288	0.711373	0.683918	0.721623	0.728951	0.710017	0.718826	0.706451	0.714645	0.717699	0.731111	0.696389	0.832916	0.673482	0.724592	0.707355	0.712613	0.709761	0.762644
			SE	0.229053	0.272853	0.253625	0.271473	0.24797	0.228359	0.298633	0.281398	0.268517	0.31301	0.240012	0.355659	0.339363	0.350547	0.300551	0.345649	0.369837	0.186865	0.363076	0.33439	0.369123	0.348905	0.32633	0.338263	0.188375	0.187529	0.335475	0.186956	0.20238	0.187994	0.195715	0.190979	0.202128	0.203175	0.247997	0.204017	0.194583	0.201002	0.217644	0.370117	0.229189	0.179554	0.248562	0.253672	0.20989	0.30212
			TR	0.833066	0.88997	0.820257	0.888444	0.823439	0.841601	0.867298	0.898965	0.88543	0.89541	0.824507	0.926341	0.909401	0.921117	0.868952	0.9159	0.94123	0.805395	0.934227	0.904295	0.94041	0.919355	0.895964	0.908356	0.806904	0.806059	0.905503	0.805485	0.851508	0.806523	0.861835	0.869229	0.850148	0.858993	0.824677	0.854788	0.857897	0.871336	0.836402	0.941573	0.827382	0.864843	0.793724	0.817194	0.849873	0.870745
			UA	0.552134	0.608023	0.540082	0.606592	0.542705	0.560648	0.586176	0.616816	0.603605	0.613964	0.543716	0.644281	0.627641	0.639109	0.587954	0.63404	0.658839	0.517592	0.651948	0.622596	0.658068	0.637403	0.614392	0.62657	0.519101	0.518255	0.623747	0.517682	0.570246	0.51872	0.580395	0.587636	0.568895	0.577657	0.543875	0.573508	0.576489	0.589866	0.555421	0.659153	0.546481	0.583311	0.531309	0.507911	0.568663	0.589642
			GB	0.460907	0.505484	0.485882	0.504021	0.480099	0.460162	0.53171	0.514203	0.501042	0.546154	0.472057	0.58955	0.572995	0.584393	0.533522	0.579366	0.604015	0.43521	0.597156	0.567968	0.603258	0.582703	0.559799	0.571916	0.43672	0.435874	0.569102	0.4353	0.443055	0.436338	0.453152	0.460347	0.441752	0.450445	0.480194	0.446311	0.449256	0.462614	0.449381	0.604321	0.461109	0.45604	0.480754	0.485984	0.425577	0.535181
		Middle East	IR	0.774264	0.799753	0.748315	0.812454	0.762148	0.782757	0.742169	0.781554	0.811503	0.770015	0.764952	0.785874	0.768796	0.780413	0.72157	0.775453	0.800372	0.692084	0.793414	0.763715	0.799906	0.778673	0.755435	0.767741	0.693594	0.692748	0.7649	0.692175	0.792548	0.693212	0.802807	0.810143	0.791191	0.800005	0.766283	0.795821	0.798881	0.812297	0.777548	0.800703	0.768592	0.805781	0.756346	0.762142	0.790932	0.679981
			IQ	1.07012	1.09616	1.04369	1.10904	1.05774	1.07873	1.03752	1.07766	1.1081	1.06569	1.06065	1.0819	1.06451	1.07638	1.01639	1.07127	1.09673	0.986748	1.08966	1.05937	1.09622	1.07459	1.05096	1.06348	0.988257	0.987411	1.06061	0.986838	1.08884	0.987876	1.09928	1.10678	1.08747	1.09637	1.06203	1.09213	1.09532	1.1088	1.07355	1.09709	1.06442	1.10235	1.05189	1.05784	1.08717	0.993718
			IL	0.489371	0.544966	0.46431	0.543556	0.477636	0.497802	0.510202	0.549119	0.540574	0.537919	0.480309	0.568105	0.551529	0.562944	0.512005	0.557907	0.582592	0.45697	0.575726	0.546498	0.581832	0.56125	0.53832	0.550452	0.45848	0.457634	0.547636	0.457061	0.507335	0.458098	0.517446	0.524654	0.505985	0.51473	0.481271	0.510592	0.513547	0.526911	0.49257	0.5829	0.483725	0.520342	0.471169	0.476828	0.505762	0.513671
			KW	0.691744	0.71708	0.66593	0.729734	0.679702	0.700206	0.65979	0.698966	0.72878	0.687545	0.682477	0.703308	0.686316	0.697862	0.639342	0.692944	0.717713	0.610646	0.710787	0.681253	0.717259	0.696139	0.673008	0.685253	0.612155	0.61131	0.682421	0.610736	0.709908	0.611774	0.720117	0.727409	0.708553	0.717344	0.683794	0.713175	0.7162	0.729597	0.694988	0.718036	0.686081	0.723064	0.673913	0.679668	0.708307	0.6177
			OM	0.583667	0.60882	0.558014	0.621417	0.571714	0.59209	0.551882	0.590807	0.620459	0.579528	0.574453	0.59534	0.578452	0.589914	0.532667	0.585045	0.609635	0.513529	0.602747	0.573409	0.609136	0.588209	0.565208	0.577381	0.515039	0.514193	0.574559	0.513619	0.601687	0.514657	0.611835	0.619075	0.600335	0.609098	0.575755	0.604948	0.607929	0.621305	0.586864	0.609948	0.578015	0.61475	0.565941	0.571645	0.600104	0.529694
			QA	0.558842	0.583936	0.533241	0.596514	0.546917	0.567253	0.527111	0.565955	0.595555	0.554721	0.549645	0.570332	0.553477	0.564912	0.506902	0.560058	0.584591	0.4817	0.577715	0.548441	0.584157	0.563213	0.540253	0.552402	0.48321	0.482364	0.549584	0.48179	0.576815	0.482828	0.586944	0.594167	0.575465	0.584218	0.550941	0.580075	0.583042	0.596411	0.562023	0.584901	0.553193	0.589849	0.541149	0.546837	0.575238	0.49265
			SA	0.690064	0.746375	0.664189	0.7449	0.677989	0.698539	0.694191	0.733604	0.741901	0.722126	0.680777	0.752722	0.735946	0.747527	0.695913	0.742391	0.767432	0.650283	0.76049	0.730874	0.766638	0.745795	0.722612	0.734887	0.651793	0.650947	0.732051	0.650373	0.708281	0.651411	0.718512	0.725824	0.706925	0.715726	0.6821	0.711551	0.714591	0.727997	0.693326	0.767759	0.684397	0.721471	0.672194	0.677967	0.706674	0.697648
			AE	0.607321	0.632506	0.58164	0.645113	0.595353	0.615751	0.575507	0.614475	0.644156	0.603171	0.598098	0.618839	0.601933	0.61341	0.555224	0.608531	0.633153	0.530122	0.626258	0.596886	0.632711	0.611701	0.588677	0.600863	0.531632	0.530786	0.598039	0.530212	0.625366	0.53125	0.635525	0.642774	0.624014	0.632781	0.599402	0.628628	0.631617	0.644997	0.610526	0.633467	0.601667	0.638445	0.589577	0.59529	0.62378	0.542413
		North America	CA	0.458915	0.490467	0.483859	0.489116	0.478085	0.457055	0.529623	0.499173	0.486138	0.531036	0.470051	0.587399	0.570864	0.582246	0.531443	0.577229	0.575083	0.414874	0.579826	0.565841	0.583772	0.580559	0.557681	0.569784	0.416384	0.415538	0.566972	0.414965	0.450563	0.416003	0.455571	0.462756	0.44929	0.456633	0.478176	0.453818	0.451079	0.46503	0.447876	0.574431	0.459112	0.458453	0.478736	0.483956	0.446743	0.533095
			MX	0.695352	0.715291	0.720624	0.714025	0.714746	0.693179	0.756127	0.720172	0.711029	0.748661	0.706644	0.784894	0.792518	0.781914	0.768787	0.793731	0.757263	0.612625	0.762079	0.795626	0.76604	0.784774	0.795429	0.799827	0.614134	0.613288	0.78826	0.612715	0.690447	0.613753	0.696329	0.703621	0.689168	0.697368	0.714892	0.693714	0.691807	0.70581	0.684452	0.756618	0.695604	0.699276	0.715447	0.720766	0.686819	0.770513
			TT	0.615117	0.624746	0.640291	0.624057	0.634444	0.612148	0.664527	0.628696	0.621067	0.657132	0.626362	0.721103	0.728078	0.718126	0.688281	0.729908	0.693566	0.554504	0.69836	0.723025	0.702317	0.72098	0.714802	0.727011	0.556014	0.555168	0.724184	0.554595	0.615563	0.555633	0.624288	0.631549	0.61421	0.622983	0.634573	0.618826	0.619775	0.633763	0.605599	0.692919	0.615353	0.627216	0.63513	0.640419	0.612978	0.689985
			US	0.748793	0.769163	0.774153	0.767865	0.768247	0.746588	0.811302	0.774783	0.764864	0.803774	0.760127	0.840827	0.848481	0.837845	0.822475	0.849694	0.81311	0.667114	0.817945	0.851606	0.821911	0.840711	0.849226	0.855824	0.668624	0.667778	0.84422	0.667205	0.743871	0.668242	0.749772	0.757093	0.742591	0.750805	0.768408	0.747142	0.745242	0.759258	0.737854	0.812467	0.749059	0.752736	0.768962	0.774307	0.740226	0.82422
		South America	AR	0.727169	0.703493	0.752476	0.71019	0.746587	0.723914	0.720881	0.693432	0.708055	0.713396	0.738477	0.778884	0.78911	0.802394	0.770682	0.789156	0.793972	0.633569	0.799114	0.78357	0.761949	0.793738	0.779829	0.791747	0.635078	0.634233	0.787806	0.633659	0.733898	0.634697	0.744121	0.751426	0.732543	0.74134	0.746738	0.737167	0.740202	0.753605	0.719941	0.801678	0.727427	0.747076	0.747293	0.752623	0.732172	0.774066
			BO	0.493259	0.489565	0.493143	0.493232	0.495315	0.495654	0.488198	0.487502	0.491673	0.498528	0.492447	0.495973	0.495379	0.493584	0.496576	0.496455	0.492845	0.493943	0.491986	0.493613	0.494721	0.49487	0.49219	0.492909	0.495453	0.494607	0.491711	0.494034	0.488595	0.495072	0.489198	0.488184	0.48774	0.492052	0.491178	0.490864	0.487036	0.497044	0.48897	0.49161	0.489275	0.487122	0.492082	0.48982	0.489808	0.492671
			BR	0.605415	0.585919	0.630555	0.590729	0.624719	0.602182	0.612048	0.580725	0.588283	0.60468	0.616644	0.682461	0.679879	0.693064	0.66158	0.679932	0.711644	0.533166	0.706041	0.674364	0.679101	0.689668	0.670638	0.682483	0.534676	0.53383	0.67856	0.533257	0.61207	0.534295	0.62223	0.629479	0.610718	0.619485	0.624842	0.615332	0.618322	0.631702	0.598236	0.713194	0.605645	0.625151	0.6254	0.630679	0.610303	0.664916
			CL	0.908231	0.892659	1.01265	0.900933	0.927829	0.907106	0.976997	0.881719	0.898578	0.984541	0.919665	0.931963	0.953216	0.956091	0.986784	0.946438	0.939659	0.792214	0.949088	0.955155	0.913	0.947088	0.950486	0.962001	0.793723	0.792877	0.958031	0.792304	0.906246	0.793342	0.913385	0.920775	0.904962	0.913729	0.928025	0.909525	0.908835	0.922885	0.897972	0.942726	0.908533	0.916391	0.928577	0.933985	0.902775	0.999098
			PE	0.617617	0.630167	0.746958	0.629366	0.636909	0.616553	0.711842	0.625321	0.626379	0.719434	0.628838	0.665305	0.683456	0.679088	0.721604	0.679974	0.654596	0.520974	0.659678	0.686022	0.646635	0.675801	0.685863	0.694436	0.522483	0.521638	0.685956	0.521064	0.615585	0.522102	0.62261	0.629854	0.614309	0.622998	0.637029	0.618847	0.618102	0.632081	0.607462	0.655437	0.617844	0.625527	0.637587	0.642861	0.612196	0.733634
			VE	0.842092	0.851915	0.867634	0.851163	0.861671	0.839044	0.892299	0.855953	0.848151	0.884643	0.853513	0.949593	0.956679	0.946607	0.916278	0.958521	0.921696	0.780301	0.926573	0.951578	0.930548	0.949484	0.943254	0.955633	0.781811	0.780965	0.952782	0.780391	0.842612	0.781429	0.851456	0.858837	0.841252	0.85009	0.861862	0.84589	0.846909	0.860954	0.832497	0.921057	0.842389	0.854457	0.862414	0.867813	0.839972	0.918064
	Blue_Grid_NH3ship
		GHG [kgCO2e/kgNH3]	Destination	Africa											Asia-Pacific																Europe																		Middle East
		Origin		DZ	AO	EG	GQ	LY	MA	MZ	NA	NG	ZA	TN	AU	BN	CN	IN	ID	JP	KZ	KR	MY	PG	PH	SG	TH	TM	UZ	VN	AZ	BE	CZ	DK	FI	FR	DE	IT	NL	NO	PL	PT	RU	ES	SE	TR	UA	GB	IR
		Africa	DZ	0.806776	0.854387	0.837176	0.854896	0.834632	0.828477	0.863584	0.859128	0.852456	0.883743	0.82874	0.904674	0.893183	0.900376	0.867775	0.897845	0.913871	0.819421	0.908771	0.889223	0.913881	0.899619	0.883296	0.891653	0.820931	0.820085	0.889364	0.819511	0.831128	0.820549	0.837399	0.841349	0.82998	0.836923	0.83302	0.833983	0.834196	0.846218	0.822634	0.913732	0.821578	0.838318	0.833702	0.835843	0.830695	0.867415
			AO	0.413105	0.385586	0.420622	0.3987	0.420343	0.413705	0.406944	0.394798	0.397329	0.412119	0.415897	0.434081	0.432844	0.43594	0.427838	0.43359	0.442089	0.395	0.439211	0.429871	0.438005	0.435686	0.42771	0.432019	0.39651	0.395664	0.429935	0.395091	0.411954	0.396129	0.415462	0.416993	0.410949	0.41661	0.417507	0.414524	0.412766	0.423807	0.408014	0.441394	0.410375	0.414921	0.418304	0.418363	0.412324	0.426216
			EG	0.732053	0.760474	0.70403	0.761279	0.726937	0.737579	0.740417	0.761679	0.758922	0.760228	0.726923	0.7762	0.766449	0.772207	0.745273	0.770539	0.783423	0.716532	0.779003	0.762839	0.783732	0.771776	0.75763	0.764769	0.718041	0.717196	0.762654	0.716622	0.73931	0.71766	0.745047	0.74853	0.73819	0.744885	0.72697	0.74211	0.741942	0.753774	0.731655	0.783108	0.727207	0.745684	0.722419	0.724203	0.739033	0.744351
			GQ	0.788823	0.760279	0.803335	0.743546	0.80081	0.787683	0.789677	0.766611	0.758285	0.789921	0.794918	0.835339	0.833487	0.841268	0.822544	0.833917	0.854014	0.756139	0.849202	0.829358	0.84422	0.839537	0.826491	0.834236	0.757649	0.756803	0.831306	0.75623	0.790857	0.757268	0.797026	0.800888	0.789714	0.79661	0.799165	0.793701	0.793841	0.805827	0.782971	0.853835	0.787242	0.797892	0.799866	0.802051	0.790454	0.823106
			LY	0.982708	1.02198	0.978461	1.02182	0.952636	0.989302	1.00982	1.02816	1.01919	1.0332	0.975329	1.05615	1.04295	1.05155	1.01335	1.04817	1.06728	0.967038	1.06151	1.03864	1.06699	1.05047	1.03201	1.04157	0.968548	0.967702	1.03911	0.967129	0.994001	0.968167	1.00147	1.00647	0.992792	1.00029	0.97905	0.99698	0.998047	1.01049	0.983635	1.06731	0.977582	1.00302	0.976339	0.979186	0.993221	1.01355
			MA	1.01487	1.04592	1.03296	1.04561	1.02929	0.991821	1.06693	1.05214	1.04306	1.07963	1.02266	1.11606	1.10194	1.11131	1.07011	1.10747	1.12824	1.00652	1.12212	1.09745	1.1278	1.11005	1.09043	1.10064	1.00803	1.00718	1.09808	1.00661	1.01987	1.00765	1.02741	1.03248	1.01866	1.02619	1.02825	1.02286	1.02398	1.03645	1.00942	1.12837	1.01388	1.02901	1.0289	1.03217	1.01907	1.0706
			MZ	0.627381	0.61442	0.615756	0.622091	0.62307	0.632557	0.583739	0.605332	0.620804	0.6068	0.622735	0.631492	0.626971	0.631274	0.615186	0.627945	0.640184	0.592121	0.636451	0.623716	0.637451	0.631174	0.619236	0.625139	0.593631	0.592785	0.623201	0.592211	0.63331	0.593249	0.638479	0.641466	0.632219	0.63865	0.622634	0.636051	0.635478	0.647109	0.626548	0.639691	0.622631	0.638816	0.618696	0.620025	0.633198	0.614315
			NA	0.427769	0.407837	0.433996	0.414093	0.435238	0.428285	0.41345	0.398077	0.4127	0.418601	0.430722	0.440661	0.439422	0.442534	0.434395	0.440167	0.448702	0.405801	0.445818	0.436445	0.444601	0.442274	0.434281	0.438602	0.407311	0.406465	0.436516	0.405892	0.42677	0.40693	0.430406	0.432051	0.425758	0.431479	0.432459	0.429352	0.427687	0.438774	0.422633	0.448008	0.425095	0.429934	0.433252	0.433414	0.427102	0.43278
			NG	0.76637	0.739655	0.780448	0.738983	0.778062	0.765393	0.768188	0.745707	0.724097	0.768703	0.77226	0.812834	0.811016	0.81854	0.800399	0.811463	0.830926	0.7354	0.826219	0.806951	0.821444	0.816891	0.804122	0.811679	0.73691	0.736064	0.808795	0.735491	0.768205	0.736528	0.774209	0.777926	0.767071	0.77389	0.776343	0.771032	0.771054	0.782982	0.760564	0.830719	0.764718	0.774987	0.77705	0.779103	0.76785	0.800841
			ZA	1.48459	1.42413	1.45913	1.43698	1.47371	1.48014	1.40203	1.40594	1.43604	1.36678	1.47696	1.47822	1.47375	1.48838	1.45242	1.47371	1.51075	1.38402	1.50312	1.46793	1.49439	1.48449	1.46305	1.47619	1.38553	1.38468	1.47263	1.38411	1.49283	1.38515	1.50425	1.51271	1.49142	1.50075	1.47851	1.49622	1.5001	1.51395	1.47713	1.51132	1.4812	1.50789	1.46773	1.47414	1.49091	1.45617
			TN	0.834369	0.866962	0.837065	0.867396	0.833876	0.840303	0.863275	0.871865	0.864935	0.884803	0.812195	0.904139	0.892724	0.899855	0.867493	0.897361	0.913249	0.824175	0.908179	0.888779	0.913273	0.899112	0.882883	0.891187	0.825685	0.824839	0.888906	0.824265	0.843178	0.825303	0.849582	0.853648	0.842024	0.849028	0.833732	0.846047	0.846354	0.858423	0.834478	0.913102	0.829507	0.850571	0.834071	0.83619	0.842707	0.86711
		Asia-Pacific	AU	0.809279	0.800529	0.793719	0.809669	0.802788	0.815408	0.77609	0.788872	0.808481	0.788688	0.803319	0.720516	0.754358	0.757458	0.778049	0.750295	0.761687	0.735352	0.760016	0.753249	0.74864	0.753218	0.751986	0.757684	0.736862	0.736016	0.7548	0.735443	0.818849	0.736481	0.825593	0.829964	0.817677	0.824839	0.803618	0.821752	0.822302	0.834494	0.809632	0.763709	0.804267	0.826765	0.798025	0.800582	0.81828	0.7833
			BN	0.754552	0.754166	0.740216	0.76298	0.74874	0.760384	0.727561	0.74308	0.76177	0.742707	0.749001	0.712674	0.67974	0.70598	0.725918	0.706623	0.713904	0.69407	0.710108	0.69927	0.717434	0.703464	0.700445	0.703529	0.695579	0.694734	0.699613	0.69416	0.762988	0.695198	0.76924	0.77318	0.761841	0.768775	0.749175	0.76584	0.76604	0.778057	0.754536	0.713571	0.749622	0.770152	0.744098	0.746273	0.762561	0.730446
			CN	0.903991	0.905486	0.886645	0.915409	0.896513	0.910552	0.872361	0.89246	0.914275	0.88964	0.897437	0.850201	0.839011	0.810089	0.868603	0.844483	0.840363	0.823002	0.835449	0.838956	0.855574	0.834108	0.838646	0.839678	0.824512	0.823666	0.833294	0.823093	0.915206	0.824131	0.922659	0.927652	0.913997	0.921488	0.897916	0.918182	0.919238	0.931681	0.904881	0.839512	0.898861	0.924206	0.891572	0.894686	0.914431	0.874911
			IN	1.07446	1.09259	1.05465	1.10361	1.06562	1.08162	1.0478	1.07763	1.10255	1.07112	1.06709	1.07589	1.06267	1.07113	1.00277	1.06799	1.0866	1.01824	1.08091	1.0584	1.08657	1.07008	1.05184	1.06127	1.01975	1.0189	1.05883	1.01833	1.08793	1.01936	1.09634	1.10218	1.08667	1.09461	1.06782	1.091	1.09275	1.10553	1.07609	1.08661	1.06917	1.0984	1.06044	1.06432	1.08687	1.03613
			ID	0.971231	0.96714	0.952705	0.977408	0.9631	0.978077	0.933955	0.953506	0.976297	0.949913	0.964284	0.90655	0.903792	0.909613	0.933317	0.874155	0.917873	0.889459	0.915732	0.903149	0.914218	0.904044	0.901755	0.908571	0.890969	0.890123	0.905386	0.889549	0.983531	0.890587	0.991451	0.996852	0.982298	0.990005	0.964884	0.986555	0.987944	1.00055	0.972475	0.920264	0.966023	0.993244	0.958043	0.961525	0.982621	0.940331
			JP	0.94624	0.948089	0.927802	0.958413	0.938156	0.953067	0.91293	0.934364	0.957306	0.930667	0.93932	0.88172	0.875071	0.866679	0.908414	0.878651	0.835695	0.848013	0.85588	0.8761	0.884382	0.86897	0.876933	0.877529	0.849523	0.848677	0.871777	0.848104	0.958472	0.849142	0.966367	0.971748	0.957241	0.964936	0.939911	0.961494	0.962864	0.975465	0.94746	0.858035	0.941037	0.968148	0.933107	0.936562	0.95757	0.915359
			KZ	0.809924	0.806231	0.809808	0.809897	0.81198	0.81232	0.804863	0.804167	0.808339	0.815194	0.809113	0.812639	0.812044	0.810249	0.813241	0.813121	0.809511	0.797406	0.808651	0.810278	0.811387	0.811536	0.808855	0.809575	0.812119	0.811273	0.808376	0.810699	0.805261	0.811737	0.805863	0.804849	0.804406	0.808718	0.807844	0.80753	0.803701	0.81371	0.805635	0.808276	0.80594	0.803787	0.808747	0.806485	0.806474	0.809336
			KR	0.911694	0.913379	0.89401	0.923428	0.904028	0.918338	0.879546	0.900133	0.922302	0.89704	0.905026	0.852682	0.843658	0.834913	0.875557	0.849454	0.829314	0.820904	0.809305	0.84481	0.857155	0.838101	0.845062	0.845591	0.822414	0.821568	0.839999	0.820995	0.923228	0.822033	0.93082	0.935936	0.922012	0.929567	0.905541	0.926219	0.927374	0.939867	0.912687	0.826685	0.906541	0.932442	0.899054	0.902274	0.922413	0.882059
			MY	0.691655	0.69074	0.678547	0.699106	0.686522	0.697191	0.666557	0.680439	0.697866	0.681056	0.686514	0.655697	0.644394	0.65011	0.665777	0.650415	0.658098	0.637879	0.654707	0.625027	0.661106	0.648659	0.642045	0.645835	0.639389	0.638543	0.642746	0.63797	0.69896	0.639008	0.704724	0.708235	0.697838	0.704546	0.686563	0.701762	0.701614	0.713456	0.69127	0.657839	0.686807	0.705378	0.682002	0.683794	0.698675	0.669578
			PG	0.839554	0.831023	0.823228	0.840442	0.832638	0.845869	0.805229	0.81888	0.839274	0.818131	0.833338	0.768952	0.780084	0.782839	0.806629	0.776903	0.784608	0.75409	0.784692	0.780343	0.740273	0.778367	0.779021	0.784927	0.755599	0.754754	0.780932	0.75418	0.849836	0.755218	0.856889	0.861533	0.848648	0.855953	0.833715	0.852771	0.853542	0.865843	0.840139	0.788548	0.834491	0.858225	0.827799	0.830595	0.849178	0.812365
			PH	0.828375	0.828353	0.812516	0.837721	0.821719	0.834576	0.799037	0.816299	0.836549	0.814706	0.822316	0.775428	0.766645	0.764963	0.796325	0.770084	0.772719	0.755979	0.768993	0.767346	0.780167	0.742039	0.768521	0.769427	0.757489	0.756643	0.76433	0.756069	0.838218	0.757107	0.845079	0.849553	0.83704	0.844256	0.822645	0.841133	0.841767	0.854	0.828817	0.77271	0.823343	0.846313	0.816926	0.819577	0.837615	0.801752
			SG	0.792859	0.795021	0.777907	0.80409	0.786706	0.79884	0.764916	0.783487	0.802898	0.782035	0.787104	0.755157	0.7448	0.749911	0.762834	0.748853	0.760199	0.734755	0.755965	0.741252	0.761527	0.749571	0.723027	0.742987	0.736264	0.735419	0.740938	0.734845	0.80186	0.735883	0.808355	0.812507	0.800701	0.807747	0.78734	0.804737	0.80511	0.817213	0.793028	0.75975	0.787888	0.809395	0.782003	0.784371	0.801363	0.767731
			TH	0.732912	0.734481	0.718973	0.74318	0.72732	0.738649	0.706534	0.723598	0.741963	0.723188	0.727494	0.696903	0.685106	0.687596	0.705171	0.691219	0.696604	0.673492	0.692596	0.682658	0.702702	0.687306	0.680224	0.661201	0.675001	0.674155	0.678581	0.673582	0.740983	0.67462	0.747078	0.75088	0.739844	0.746705	0.727628	0.743819	0.743907	0.755868	0.732777	0.695931	0.728009	0.747907	0.722717	0.724768	0.740602	0.709463
			TM	1.6042	1.60051	1.60408	1.60417	1.60625	1.60659	1.59914	1.59844	1.60261	1.60947	1.60339	1.60691	1.60632	1.60452	1.60752	1.6074	1.60379	1.60488	1.60293	1.60455	1.60566	1.60581	1.60313	1.60385	1.59007	1.60555	1.60265	1.60497	1.59954	1.60601	1.60014	1.59912	1.59868	1.60299	1.60212	1.6018	1.59798	1.60798	1.59991	1.60255	1.60021	1.59806	1.60302	1.60076	1.60075	1.60361
			UZ	0.950436	0.946743	0.95032	0.95041	0.952492	0.952832	0.945376	0.944679	0.948851	0.955706	0.949625	0.953151	0.952557	0.950761	0.953753	0.953633	0.950023	0.951121	0.949163	0.95079	0.951899	0.952048	0.949368	0.950087	0.952631	0.937308	0.948889	0.951212	0.945773	0.952249	0.946375	0.945361	0.944918	0.94923	0.948356	0.948042	0.944213	0.954222	0.946148	0.948788	0.946452	0.944299	0.949259	0.946997	0.946986	0.949849
			VN	0.655575	0.65603	0.643122	0.66418	0.650805	0.660952	0.631489	0.646108	0.662926	0.647207	0.650652	0.623065	0.61147	0.612079	0.631173	0.618068	0.62062	0.603286	0.616953	0.609665	0.62727	0.612639	0.608428	0.608803	0.604796	0.60395	0.592013	0.603377	0.662276	0.604415	0.66778	0.671064	0.661168	0.667754	0.650635	0.665051	0.664717	0.676468	0.654993	0.619882	0.65077	0.668296	0.646349	0.647937	0.662067	0.634584
		Europe	AZ	0.666488	0.662794	0.666372	0.666461	0.668544	0.668884	0.661427	0.660731	0.664902	0.671758	0.665677	0.669203	0.668608	0.666813	0.669805	0.669685	0.666075	0.667173	0.665215	0.666842	0.667951	0.668099	0.665419	0.666139	0.668682	0.667837	0.66494	0.653961	0.661825	0.668301	0.662427	0.661413	0.660969	0.665282	0.664408	0.664094	0.660265	0.670274	0.662199	0.664839	0.662504	0.660351	0.665311	0.663049	0.663038	0.6659
			BE	0.348435	0.356968	0.354567	0.359294	0.354734	0.350064	0.362989	0.357755	0.357366	0.374448	0.350574	0.384986	0.379738	0.381782	0.369581	0.382346	0.387125	0.342086	0.384453	0.377036	0.388203	0.382195	0.37369	0.37767	0.343595	0.342749	0.376006	0.342176	0.333492	0.343214	0.341254	0.342223	0.33768	0.342718	0.351661	0.340844	0.338669	0.349489	0.342385	0.386358	0.345478	0.340374	0.352478	0.352115	0.341123	0.367189
			CZ	0.969879	0.966186	0.969763	0.969852	0.971935	0.972275	0.964818	0.964122	0.968293	0.975149	0.969068	0.972594	0.971999	0.970204	0.973196	0.973076	0.969466	0.970564	0.968606	0.970233	0.971342	0.971491	0.96881	0.96953	0.972074	0.971228	0.968331	0.970654	0.965216	0.95636	0.965818	0.964804	0.964361	0.968673	0.967799	0.967485	0.963656	0.973665	0.96559	0.968231	0.965895	0.963742	0.968702	0.96644	0.966429	0.969291
			DK	0.342022	0.350411	0.34808	0.352753	0.34827	0.343661	0.356348	0.351166	0.350829	0.367794	0.344126	0.378189	0.372991	0.374993	0.36296	0.375582	0.380272	0.333573	0.377619	0.370299	0.381359	0.375416	0.366974	0.370919	0.335083	0.334237	0.36926	0.333664	0.33204	0.334702	0.324489	0.331817	0.331328	0.334865	0.345185	0.334158	0.329045	0.33904	0.335994	0.3795	0.339053	0.33	0.346003	0.345618	0.334757	0.360551
			FI	0.402694	0.413354	0.409912	0.415446	0.409729	0.40419	0.420668	0.41464	0.413454	0.432324	0.405345	0.445165	0.439097	0.441817	0.426947	0.441974	0.448234	0.390315	0.445242	0.43623	0.449172	0.442076	0.432546	0.437099	0.391825	0.390979	0.435353	0.390406	0.391713	0.391444	0.390269	0.382038	0.391028	0.394419	0.406842	0.393803	0.388395	0.397401	0.396339	0.44755	0.399915	0.386274	0.407643	0.407611	0.394713	0.424819
			FR	0.452361	0.464602	0.460389	0.466522	0.459947	0.453758	0.472865	0.466255	0.464482	0.484666	0.455395	0.499176	0.492516	0.495724	0.478916	0.495588	0.502911	0.444029	0.49969	0.489529	0.503748	0.495872	0.485601	0.490569	0.445539	0.444693	0.488764	0.444119	0.441026	0.445157	0.44458	0.446155	0.436091	0.445698	0.457197	0.443596	0.441875	0.452934	0.445777	0.502286	0.449716	0.444066	0.457987	0.4582	0.443892	0.476982
			DE	0.641263	0.660328	0.652777	0.661499	0.651216	0.642232	0.672717	0.663573	0.659253	0.685148	0.645943	0.706975	0.697714	0.703067	0.67777	0.701642	0.713655	0.627144	0.70942	0.694204	0.714045	0.702728	0.6892	0.695991	0.628654	0.627808	0.693926	0.627234	0.626465	0.628272	0.628441	0.631083	0.625993	0.615579	0.64906	0.628517	0.625506	0.637004	0.633696	0.713291	0.63919	0.628571	0.649802	0.651074	0.630625	0.676681
			IT	0.872977	0.907508	0.871557	0.907767	0.870997	0.879082	0.899122	0.91279	0.905258	0.921138	0.867864	0.94143	0.929542	0.937063	0.903159	0.934335	0.951075	0.85655	0.945821	0.925502	0.951018	0.936231	0.919411	0.928046	0.858059	0.857213	0.925717	0.85664	0.882491	0.857678	0.889208	0.893549	0.881321	0.888471	0.845597	0.885392	0.885923	0.898103	0.873304	0.950976	0.867735	0.890362	0.867773	0.870084	0.881929	0.90293
			NL	0.502178	0.516219	0.511125	0.517941	0.510388	0.503463	0.52557	0.518292	0.515847	0.537537	0.505647	0.553976	0.546631	0.550404	0.531357	0.549928	0.558488	0.492325	0.554999	0.543506	0.559207	0.550424	0.539293	0.544743	0.493835	0.492989	0.542869	0.492416	0.489638	0.493454	0.493025	0.49488	0.48906	0.493918	0.507795	0.481798	0.490225	0.501433	0.495335	0.557932	0.499684	0.49268	0.508573	0.509065	0.493127	0.529646
			NO	0.118954	0.119308	0.120907	0.122531	0.122414	0.121096	0.120388	0.118189	0.12085	0.131092	0.119119	0.132874	0.130738	0.130215	0.128174	0.132322	0.131492	0.116712	0.130032	0.128662	0.133104	0.131212	0.126602	0.128402	0.118221	0.117376	0.127049	0.116802	0.112506	0.11784	0.112765	0.112379	0.111702	0.115753	0.11863	0.114719	0.109503	0.120723	0.114082	0.130412	0.11531	0.111063	0.119505	0.117872	0.114226	0.12477
			PL	0.995875	1.02784	1.01398	1.0276	1.0103	0.996036	1.04804	1.0341	1.02496	1.06166	1.00367	1.09733	1.08315	1.09256	1.0512	1.08869	1.10959	0.968515	1.10343	1.07865	1.10913	1.0913	1.07161	1.08185	0.970024	0.969179	1.07929	0.968605	0.975513	0.969643	0.970733	0.972752	0.975081	0.977104	1.00927	0.977338	0.969584	0.952691	0.986452	1.10972	0.994886	0.969475	1.00992	1.0132	0.981166	1.05171
			PT	0.825972	0.851722	0.840664	0.85222	0.838083	0.826586	0.867378	0.85641	0.849785	0.880866	0.832154	0.908808	0.897205	0.904491	0.871528	0.901904	0.918135	0.81848	0.91299	0.893222	0.918125	0.903712	0.887249	0.895684	0.819989	0.819143	0.893384	0.81857	0.825902	0.819608	0.832108	0.836002	0.824758	0.831671	0.836468	0.82875	0.828917	0.840916	0.809359	0.918007	0.824422	0.832993	0.837166	0.839403	0.825488	0.871203
			RU	0.675997	0.676273	0.662811	0.684688	0.670819	0.681553	0.650786	0.66589	0.683452	0.666414	0.670828	0.632736	0.625943	0.618948	0.649966	0.630474	0.613182	0.605488	0.609497	0.626305	0.635739	0.621648	0.626208	0.626698	0.606997	0.606152	0.622255	0.605578	0.683385	0.606616	0.68919	0.692738	0.682262	0.688988	0.670886	0.686192	0.686072	0.69793	0.675638	0.594296	0.671143	0.689866	0.666291	0.668107	0.68309	0.653801
			ES	0.687783	0.713323	0.696604	0.714347	0.694869	0.692634	0.717675	0.716955	0.712051	0.737359	0.689565	0.753093	0.743458	0.74912	0.722579	0.747509	0.760191	0.68279	0.755813	0.739871	0.760519	0.74871	0.734711	0.741767	0.6843	0.683454	0.739664	0.68288	0.6937	0.683918	0.699046	0.702187	0.6926	0.699114	0.692637	0.696459	0.696013	0.707706	0.686653	0.759864	0.673482	0.699476	0.69354	0.694932	0.693536	0.721616
			SE	0.191874	0.194882	0.195182	0.197814	0.196255	0.193849	0.197568	0.194383	0.196052	0.208517	0.192679	0.213149	0.21	0.210312	0.204966	0.211917	0.212914	0.186865	0.211059	0.20772	0.214352	0.211119	0.205241	0.207751	0.188375	0.187529	0.206297	0.186956	0.18426	0.187994	0.183908	0.18241	0.183484	0.187366	0.192702	0.186446	0.181881	0.191422	0.18662	0.211936	0.188452	0.179554	0.193557	0.192336	0.186307	0.201891
			TR	0.820574	0.852803	0.813313	0.853269	0.816049	0.826471	0.838452	0.857639	0.850817	0.859592	0.815387	0.878166	0.867128	0.873947	0.842814	0.871641	0.886846	0.805395	0.881924	0.863259	0.886934	0.873275	0.857519	0.865559	0.806904	0.806059	0.863315	0.805485	0.829246	0.806523	0.835591	0.839607	0.828094	0.835072	0.814927	0.832108	0.832374	0.844423	0.820638	0.88666	0.815626	0.83655	0.793724	0.810135	0.828792	0.84231
			UA	0.529819	0.549385	0.525279	0.550982	0.527616	0.534512	0.539794	0.551784	0.548846	0.557119	0.526179	0.568239	0.560885	0.564665	0.545574	0.564186	0.572755	0.517592	0.569265	0.557758	0.573474	0.564684	0.553541	0.558998	0.519101	0.518255	0.557123	0.517682	0.53381	0.51872	0.538125	0.540364	0.532763	0.538799	0.525439	0.536463	0.535281	0.546609	0.528378	0.572199	0.525212	0.538011	0.521399	0.507911	0.533945	0.543869
			GB	0.442647	0.454515	0.450484	0.456475	0.450103	0.444067	0.462551	0.45608	0.454446	0.474317	0.445591	0.488423	0.481908	0.484997	0.468656	0.484932	0.491996	0.43521	0.488831	0.47895	0.492857	0.485172	0.47508	0.479948	0.43672	0.435874	0.478157	0.4353	0.433916	0.436338	0.437439	0.438982	0.432924	0.438578	0.447321	0.436487	0.43474	0.445786	0.436116	0.491357	0.43997	0.436906	0.448114	0.448269	0.425577	0.466676
		Middle East	IR	0.732944	0.745072	0.719372	0.753777	0.727556	0.73859	0.713814	0.734177	0.75256	0.733197	0.72765	0.74041	0.73106	0.736373	0.707702	0.735077	0.746881	0.692084	0.742672	0.727558	0.747467	0.736043	0.722571	0.729333	0.693594	0.692748	0.727272	0.692175	0.740664	0.693212	0.746605	0.750269	0.739534	0.746323	0.727746	0.743485	0.743462	0.755368	0.732696	0.746511	0.728065	0.747351	0.72299	0.724926	0.740328	0.679981
			IQ	1.04517	1.06409	1.02582	1.07495	1.03658	1.05221	1.02	1.0494	1.07388	1.04327	1.03795	1.05467	1.04156	1.04993	1.00767	1.04684	1.06526	0.986748	1.05962	1.03732	1.0653	1.0489	1.0308	1.04016	0.988257	0.987411	1.03772	0.986838	1.0582	0.987876	1.06643	1.07211	1.05695	1.06481	1.03863	1.06126	1.06287	1.07559	1.04665	1.06526	1.0399	1.06839	1.03144	1.03518	1.0572	0.991033
			IL	0.467007	0.48373	0.458808	0.485578	0.464559	0.471401	0.470645	0.483912	0.483511	0.487004	0.46349	0.49623	0.489813	0.492821	0.476783	0.492806	0.499685	0.45697	0.49656	0.486874	0.500564	0.493015	0.483044	0.487845	0.45848	0.457634	0.486064	0.457061	0.469927	0.458098	0.473792	0.475636	0.468904	0.47473	0.462949	0.472534	0.471031	0.482198	0.4652	0.499034	0.462475	0.47344	0.460282	0.460584	0.470194	0.474775
			KW	0.646268	0.656502	0.634307	0.664604	0.641772	0.651525	0.628822	0.646664	0.663346	0.647122	0.641511	0.653165	0.644863	0.649326	0.624445	0.648529	0.658488	0.610646	0.654679	0.64157	0.659228	0.649189	0.637009	0.643048	0.612155	0.61131	0.64109	0.610736	0.652506	0.611774	0.657808	0.660912	0.651409	0.657902	0.641444	0.655261	0.654783	0.666461	0.645537	0.658014	0.641497	0.658216	0.637365	0.638799	0.652356	0.612945
			OM	0.539205	0.547018	0.5293	0.554348	0.535846	0.543965	0.523908	0.538532	0.553038	0.540825	0.535132	0.545441	0.538476	0.541853	0.522121	0.541692	0.549296	0.513529	0.546	0.535447	0.550209	0.541963	0.53143	0.536547	0.515039	0.514193	0.534721	0.513619	0.543548	0.514657	0.548033	0.55042	0.542493	0.548607	0.534857	0.546218	0.545157	0.556545	0.537855	0.54869	0.53457	0.548008	0.531643	0.532435	0.543635	0.518553
			QA	0.508357	0.515563	0.498971	0.5227	0.505285	0.512992	0.493603	0.507415	0.521376	0.510171	0.504457	0.514345	0.507718	0.51082	0.491997	0.510821	0.51783	0.4817	0.514662	0.504757	0.518817	0.510993	0.500878	0.505761	0.48321	0.482364	0.503968	0.48179	0.512225	0.482828	0.516504	0.518713	0.51118	0.517198	0.504129	0.514874	0.513667	0.524982	0.506852	0.51719	0.503757	0.516372	0.501133	0.501764	0.512371	0.484577
			SA	0.668168	0.693942	0.656157	0.694982	0.663645	0.673435	0.667456	0.68643	0.692691	0.68628	0.663395	0.700319	0.691524	0.696494	0.672678	0.6953	0.706461	0.650283	0.702413	0.688107	0.706934	0.696242	0.683292	0.689762	0.651793	0.650947	0.687742	0.650373	0.674441	0.651411	0.679754	0.682867	0.673343	0.679841	0.663333	0.677197	0.676727	0.688409	0.667449	0.706049	0.663393	0.680167	0.659233	0.660683	0.674286	0.671445
			AE	0.559489	0.567803	0.54916	0.575293	0.555895	0.564351	0.543749	0.559037	0.573993	0.560951	0.555275	0.565809	0.55857	0.562169	0.541133	0.561878	0.569967	0.530122	0.566565	0.555486	0.570864	0.562229	0.551358	0.556664	0.531632	0.530786	0.554811	0.530212	0.564224	0.53125	0.568877	0.571413	0.56316	0.569352	0.555042	0.566911	0.565971	0.577419	0.558267	0.569388	0.554826	0.568943	0.55165	0.552575	0.564261	0.533902
		North America	CA	0.427456	0.434787	0.43512	0.436849	0.434794	0.428558	0.44683	0.436208	0.434839	0.454139	0.430318	0.472342	0.465942	0.468935	0.452982	0.468928	0.46585	0.414874	0.467035	0.463007	0.470215	0.469132	0.459186	0.463972	0.416384	0.415538	0.462193	0.414965	0.421671	0.416003	0.423613	0.425116	0.420689	0.425922	0.431983	0.424239	0.420742	0.431953	0.421119	0.464826	0.42475	0.423056	0.432778	0.432881	0.421363	0.450962
			MX	0.64913	0.656791	0.661228	0.658055	0.659478	0.649375	0.67673	0.658141	0.655799	0.67791	0.654084	0.695626	0.699485	0.692919	0.687347	0.700636	0.679552	0.612625	0.681647	0.700388	0.685025	0.695053	0.69964	0.702391	0.614134	0.613288	0.695496	0.612715	0.644352	0.613753	0.647456	0.650418	0.643297	0.649449	0.657422	0.647093	0.644174	0.656081	0.641734	0.678623	0.647152	0.647778	0.658156	0.659608	0.643288	0.686409
			TT	0.57825	0.58014	0.588826	0.581969	0.587565	0.578427	0.596726	0.580632	0.579809	0.599188	0.582487	0.62729	0.630388	0.624616	0.612101	0.631834	0.612551	0.554504	0.614341	0.627013	0.617653	0.626663	0.622289	0.628607	0.556014	0.555168	0.626609	0.554595	0.575715	0.555633	0.579734	0.582243	0.574652	0.580834	0.58525	0.5784	0.576579	0.58827	0.571798	0.61159	0.576023	0.579783	0.586005	0.586994	0.575344	0.61079
			US	0.706273	0.715117	0.719444	0.716161	0.717349	0.706322	0.73759	0.717151	0.713843	0.737945	0.711734	0.75789	0.762157	0.755153	0.747554	0.763314	0.740633	0.667114	0.742998	0.763303	0.746434	0.757365	0.761309	0.765553	0.668624	0.667778	0.758137	0.667205	0.701478	0.668242	0.704801	0.708112	0.700405	0.706718	0.715476	0.70426	0.70142	0.713495	0.698597	0.739732	0.704472	0.705334	0.716195	0.717974	0.700214	0.746876
		South America	AR	0.676649	0.663196	0.689374	0.668324	0.687422	0.676256	0.670981	0.657305	0.666487	0.672612	0.681899	0.704559	0.709785	0.716265	0.700496	0.710303	0.711286	0.633569	0.713734	0.705978	0.69504	0.712074	0.703307	0.710096	0.635078	0.634233	0.707402	0.633659	0.67768	0.634697	0.683167	0.686433	0.676573	0.683152	0.685473	0.680454	0.680107	0.691851	0.670907	0.71499	0.674774	0.683673	0.686198	0.687841	0.677415	0.700449
			BO	0.493259	0.489565	0.493143	0.493232	0.495315	0.495654	0.488198	0.487502	0.491673	0.498528	0.492447	0.495973	0.495379	0.493584	0.496576	0.496455	0.492845	0.493943	0.491986	0.493613	0.494721	0.49487	0.49219	0.492909	0.495453	0.494607	0.491711	0.494034	0.488595	0.495072	0.489198	0.488184	0.48774	0.492052	0.491178	0.490864	0.487036	0.497044	0.48897	0.49161	0.489275	0.487122	0.492082	0.48982	0.489808	0.492671
			BR	0.560683	0.550642	0.571022	0.554763	0.569836	0.560801	0.560414	0.547338	0.552851	0.563523	0.564807	0.595334	0.593838	0.598908	0.586335	0.594451	0.607262	0.533166	0.604144	0.590379	0.593126	0.598031	0.587921	0.593676	0.534676	0.53383	0.591236	0.533257	0.560656	0.534295	0.565235	0.567705	0.559596	0.565754	0.567481	0.563336	0.562343	0.573764	0.555222	0.607361	0.558416	0.565261	0.568239	0.569156	0.560641	0.585631
			CL	0.85976	0.848595	0.931534	0.855144	0.873093	0.859927	0.90425	0.841033	0.853086	0.912606	0.866789	0.87602	0.889969	0.891345	0.913629	0.885761	0.880037	0.792214	0.886078	0.890717	0.863325	0.885673	0.887091	0.895182	0.793723	0.792877	0.892079	0.792304	0.856799	0.793342	0.861585	0.866012	0.855671	0.862828	0.871787	0.859712	0.85789	0.870497	0.8517	0.881674	0.858504	0.862791	0.87246	0.875252	0.855039	0.921413
			PE	0.557727	0.560805	0.616611	0.562593	0.566973	0.558702	0.596818	0.557569	0.560436	0.605837	0.561915	0.579604	0.587394	0.584434	0.605861	0.586409	0.573154	0.520974	0.574895	0.587602	0.570775	0.58366	0.586757	0.591094	0.522483	0.521638	0.58654	0.521064	0.554149	0.522102	0.55742	0.559874	0.55312	0.559247	0.564642	0.556829	0.55428	0.565945	0.551033	0.572824	0.555483	0.557436	0.565398	0.566358	0.553466	0.609725
			VE	0.814264	0.818459	0.829256	0.81953	0.826577	0.813525	0.842459	0.820008	0.817121	0.841672	0.820585	0.882435	0.887057	0.879643	0.860724	0.888656	0.8629	0.780301	0.865785	0.883018	0.869335	0.882004	0.876931	0.885561	0.781811	0.780965	0.883232	0.780391	0.812608	0.781429	0.818038	0.822001	0.811459	0.818413	0.825014	0.815465	0.814473	0.826859	0.80692	0.862053	0.812762	0.818964	0.825707	0.828038	0.811583	0.860484
	Blue_Renew_MDOship
		GHG [kgCO2e/kgNH3]	Destination	Africa											Asia-Pacific																Europe																		Middle East
		Origin		DZ	AO	EG	GQ	LY	MA	MZ	NA	NG	ZA	TN	AU	BN	CN	IN	ID	JP	KZ	KR	MY	PG	PH	SG	TH	TM	UZ	VN	AZ	BE	CZ	DK	FI	FR	DE	IT	NL	NO	PL	PT	RU	ES	SE	TR	UA	GB	IR
		Africa	DZ	0.806776	0.881085	0.842805	0.875391	0.833854	0.821359	0.899834	0.893214	0.873795	0.91687	0.82806	0.956073	0.938142	0.952964	0.892458	0.944091	0.975837	0.807147	0.969098	0.934479	0.972879	0.94962	0.926901	0.939705	0.807147	0.807147	0.93789	0.807147	0.839967	0.807147	0.850632	0.859853	0.839413	0.844384	0.838657	0.841075	0.848684	0.852446	0.822988	0.977569	0.820351	0.856208	0.838237	0.846551	0.836843	0.898708
			AO	0.457823	0.385586	0.485324	0.403122	0.476605	0.451202	0.453775	0.410299	0.40386	0.434503	0.470934	0.521974	0.51981	0.53612	0.498584	0.518695	0.558463	0.385763	0.551988	0.515729	0.539169	0.531022	0.513221	0.525334	0.385763	0.385763	0.522367	0.385763	0.470607	0.385763	0.481014	0.490012	0.470066	0.474917	0.481243	0.471688	0.479113	0.482784	0.454873	0.560184	0.462412	0.486455	0.480866	0.489078	0.467558	0.506468
			EG	0.739781	0.805856	0.70403	0.800194	0.724221	0.746476	0.768099	0.812269	0.798608	0.787486	0.730448	0.823994	0.806173	0.820904	0.760768	0.812085	0.843637	0.704354	0.836938	0.802532	0.840697	0.81758	0.795	0.807726	0.704354	0.704354	0.805923	0.704354	0.764976	0.704354	0.775579	0.784747	0.764425	0.769368	0.733303	0.766078	0.773642	0.777383	0.748095	0.845357	0.737928	0.781123	0.7214	0.730248	0.76187	0.76698
			GQ	0.81187	0.761683	0.839956	0.743546	0.831051	0.804925	0.823352	0.779002	0.753083	0.803669	0.82526	0.893009	0.890799	0.907459	0.869118	0.88966	0.930284	0.743888	0.923669	0.88663	0.910574	0.902252	0.884068	0.896442	0.743888	0.743888	0.893411	0.743888	0.824858	0.743888	0.835487	0.844677	0.824306	0.82926	0.835788	0.825963	0.833545	0.837295	0.808807	0.932042	0.816556	0.841044	0.835403	0.843789	0.821745	0.87717
			LY	0.980033	1.04708	0.973276	1.04133	0.952636	0.986841	1.03078	1.05931	1.03973	1.05045	0.969262	1.08749	1.06941	1.08436	1.02334	1.07541	1.10742	0.953075	1.10063	1.06572	1.10444	1.08098	1.05807	1.07099	0.953075	0.953075	1.06916	0.953075	1.00561	0.953075	1.01636	1.02566	1.00505	1.01006	0.977459	1.00673	1.0144	1.01819	0.988484	1.10917	0.97817	1.02199	0.971532	0.979898	1.00246	1.02965
			MA	1.00668	1.06018	1.03516	1.05424	1.02613	0.991821	1.0928	1.07242	1.05274	1.09618	1.02025	1.14965	1.13152	1.1465	1.08534	1.13754	1.16963	0.992277	1.16281	1.12782	1.16664	1.14312	1.12016	1.1331	0.992277	0.992277	1.13127	0.992277	1.02192	0.992277	1.0327	1.04202	1.02136	1.02638	1.03093	1.02304	1.03073	1.03453	1.00483	1.17138	1.01143	1.03833	1.03054	1.03904	1.01876	1.09166
			MZ	0.675457	0.652856	0.647284	0.662705	0.660002	0.682107	0.583739	0.635264	0.663368	0.61066	0.666187	0.678807	0.669355	0.683981	0.637237	0.669106	0.706551	0.584008	0.699901	0.66574	0.695855	0.680681	0.658261	0.670897	0.584008	0.584008	0.669106	0.584008	0.700482	0.584008	0.711013	0.720118	0.699934	0.704843	0.669023	0.701576	0.709089	0.712804	0.683715	0.70826	0.673616	0.716519	0.6572	0.665988	0.697397	0.644864
			NA	0.482218	0.422817	0.504196	0.432607	0.501014	0.475575	0.448925	0.398077	0.43323	0.429639	0.495339	0.517171	0.515005	0.531327	0.493764	0.51389	0.553685	0.39826	0.547206	0.510921	0.534378	0.526225	0.508412	0.520533	0.39826	0.39826	0.517564	0.39826	0.494995	0.39826	0.50541	0.514415	0.494453	0.499308	0.505656	0.496077	0.503507	0.507181	0.479233	0.555408	0.48681	0.510856	0.505279	0.513496	0.491944	0.501654
			NG	0.790744	0.742954	0.818798	0.733611	0.809903	0.783923	0.80447	0.760136	0.724097	0.784809	0.804118	0.874048	0.87184	0.888482	0.850184	0.870703	0.91128	0.72443	0.904673	0.867676	0.891593	0.88328	0.865117	0.877476	0.72443	0.72443	0.874449	0.72443	0.803717	0.72443	0.814334	0.823513	0.803165	0.808114	0.814635	0.804821	0.812394	0.81614	0.787685	0.913036	0.795425	0.819885	0.81425	0.822627	0.800608	0.858227
			ZA	1.4808	1.41917	1.45387	1.42947	1.46718	1.47362	1.39543	1.40077	1.43017	1.36678	1.47365	1.47126	1.46714	1.48441	1.44284	1.46596	1.50806	1.36741	1.5012	1.46282	1.48946	1.47901	1.45913	1.47235	1.36741	1.36741	1.46985	1.36741	1.49416	1.36741	1.50518	1.5147	1.49358	1.49872	1.47662	1.4953	1.50316	1.50705	1.47748	1.50988	1.48142	1.51094	1.46425	1.47344	1.49093	1.45119
			TN	0.833488	0.899974	0.838847	0.894277	0.8286	0.840225	0.895891	0.912108	0.892681	0.915402	0.812195	0.952145	0.93421	0.949035	0.888514	0.94016	0.971915	0.812568	0.965173	0.930545	0.968956	0.94569	0.922965	0.935773	0.812568	0.812568	0.933957	0.812568	0.85884	0.812568	0.869509	0.878734	0.858285	0.863259	0.836243	0.859949	0.86756	0.871324	0.841854	0.973646	0.831808	0.875088	0.835168	0.843484	0.855715	0.894765
		Asia-Pacific	AU	0.869012	0.859832	0.840605	0.869764	0.853429	0.875717	0.816432	0.842093	0.870433	0.820812	0.859665	0.720516	0.758267	0.768428	0.803895	0.747455	0.778606	0.720847	0.776951	0.759637	0.747622	0.756947	0.759971	0.770283	0.720847	0.720847	0.766807	0.720847	0.894245	0.720847	0.904864	0.914046	0.893693	0.898643	0.862524	0.895349	0.902925	0.906671	0.877339	0.785208	0.867156	0.910417	0.850603	0.859465	0.891135	0.821714
			BN	0.810061	0.816499	0.781724	0.826407	0.794516	0.816749	0.765898	0.798802	0.827074	0.775821	0.800737	0.717377	0.67974	0.707807	0.744821	0.702806	0.726947	0.680053	0.720511	0.692586	0.730548	0.699255	0.698488	0.703823	0.680053	0.680053	0.697688	0.680053	0.835231	0.680053	0.845824	0.854983	0.834681	0.839618	0.803589	0.836332	0.843889	0.847626	0.818367	0.728914	0.808209	0.851363	0.791697	0.800537	0.832128	0.762596
			CN	0.956307	0.964694	0.927751	0.974679	0.940642	0.963047	0.911803	0.946861	0.975352	0.923701	0.946911	0.858306	0.83845	0.810089	0.890564	0.846748	0.845791	0.810461	0.838131	0.841692	0.870469	0.830068	0.843792	0.84438	0.810461	0.810461	0.834553	0.810461	0.981673	0.810461	0.992348	1.00158	0.981118	0.986094	0.949785	0.982782	0.990398	0.994163	0.964678	0.846513	0.954441	0.997929	0.937802	0.946709	0.978546	0.908476
			IN	1.08955	1.12031	1.06069	1.1304	1.07372	1.09636	1.05785	1.10228	1.13108	1.07706	1.08005	1.0877	1.06928	1.08427	1.00277	1.07552	1.10739	1.00324	1.10058	1.06558	1.10471	1.08088	1.05792	1.07086	1.00324	1.00324	1.06903	1.00324	1.11519	1.00324	1.12598	1.13531	1.11463	1.11966	1.08296	1.11631	1.12401	1.12782	1.09801	1.10914	1.08766	1.13162	1.07084	1.07985	1.11203	1.03329
			ID	1.01205	1.01144	0.983388	1.02146	0.996326	1.01881	0.961158	0.993543	1.02214	0.970299	1.00262	0.901431	0.897604	0.910991	0.946283	0.874155	0.92652	0.874558	0.924328	0.899593	0.91701	0.898953	0.899644	0.91035	0.874558	0.874558	0.906877	0.874558	1.03751	0.874558	1.04822	1.05749	1.03695	1.04195	1.0055	1.03862	1.04627	1.05005	1.02045	0.932691	1.01018	1.05383	0.993475	1.00242	1.03437	0.964261
			JP	1.00506	1.01349	0.976457	1.02349	0.989368	1.01181	0.960483	0.99563	1.02417	0.972433	0.995647	0.894246	0.883428	0.871466	0.939209	0.88792	0.835695	0.836079	0.854475	0.888441	0.901161	0.8733	0.892462	0.892244	0.836079	0.836079	0.884101	0.836079	1.03047	0.836079	1.04116	1.0504	1.02991	1.03489	0.998526	1.03158	1.0392	1.04298	1.01344	0.859185	1.00319	1.04675	0.986523	0.995445	1.02733	0.95715
			KZ	0.797773	0.797773	0.797773	0.797773	0.797773	0.797773	0.797773	0.797773	0.797773	0.797773	0.797773	0.797773	0.797773	0.797773	0.797773	0.797773	0.797773	0.797406	0.797773	0.797773	0.797773	0.797773	0.797773	0.797773	0.797773	0.797773	0.797773	0.797773	0.797773	0.797773	0.797773	0.797773	0.797773	0.797773	0.797773	0.797773	0.797773	0.797773	0.797773	0.797773	0.797773	0.797773	0.797773	0.797773	0.797773	0.797773
			KR	0.971652	0.980175	0.943095	0.99016	0.955987	0.978393	0.927147	0.96234	0.990832	0.93918	0.962256	0.866087	0.850464	0.837345	0.905906	0.85925	0.82804	0.809677	0.809305	0.855907	0.87652	0.840957	0.859015	0.858662	0.809677	0.809677	0.850481	0.809677	0.997019	0.809677	1.00769	1.01692	0.996464	1.00144	0.96513	0.998128	1.00574	1.00951	0.980023	0.825353	0.969786	1.01328	0.953146	0.962054	0.993892	0.923819
			MY	0.751272	0.757174	0.723027	0.76705	0.735778	0.757939	0.707252	0.739535	0.767715	0.716627	0.741979	0.663872	0.637798	0.656177	0.686242	0.649945	0.677001	0.625315	0.671018	0.625027	0.679661	0.64953	0.639875	0.647419	0.625315	0.625315	0.642783	0.625315	0.776361	0.625315	0.78692	0.796049	0.775813	0.780734	0.744822	0.777459	0.784991	0.788716	0.759552	0.679295	0.749427	0.792441	0.732968	0.741779	0.773269	0.703961
			PG	0.905694	0.897323	0.877252	0.907267	0.890091	0.912407	0.853517	0.879562	0.907937	0.858254	0.896335	0.767423	0.791298	0.800367	0.840513	0.782714	0.80532	0.740614	0.807177	0.795347	0.740273	0.788872	0.795548	0.805822	0.740614	0.740614	0.8003	0.740614	0.930958	0.740614	0.941591	0.950784	0.930406	0.935362	0.899198	0.932063	0.939649	0.943399	0.914031	0.815443	0.903835	0.94715	0.887262	0.896134	0.927844	0.858421
			PH	0.884307	0.890786	0.855865	0.900731	0.868704	0.89102	0.83998	0.873023	0.9014	0.849956	0.874948	0.778529	0.761664	0.761898	0.818825	0.766566	0.779383	0.742381	0.773526	0.766783	0.790644	0.742039	0.772137	0.772522	0.742381	0.742381	0.764474	0.742381	0.909571	0.742381	0.920203	0.929396	0.909018	0.913975	0.877811	0.910676	0.918261	0.922012	0.892644	0.781876	0.882448	0.925763	0.865875	0.874747	0.906457	0.836666
			SG	0.842517	0.853436	0.81411	0.863369	0.826934	0.849222	0.798245	0.835695	0.864038	0.811653	0.83317	0.76249	0.741849	0.756507	0.777116	0.7482	0.779356	0.72336	0.772435	0.738022	0.778236	0.75308	0.723027	0.743253	0.72336	0.72336	0.741431	0.72336	0.867751	0.72336	0.87837	0.887551	0.867199	0.872149	0.83603	0.868854	0.87643	0.880176	0.850844	0.78096	0.840661	0.883922	0.824108	0.83297	0.86464	0.794935
			TH	0.792918	0.803415	0.764612	0.813312	0.77739	0.799599	0.748803	0.785737	0.813979	0.762163	0.783604	0.71076	0.685245	0.695104	0.727748	0.69682	0.717072	0.661505	0.710043	0.683663	0.726399	0.69149	0.681315	0.661201	0.661505	0.661505	0.678601	0.661505	0.818061	0.661505	0.828643	0.837791	0.817511	0.822444	0.786453	0.819161	0.82671	0.830442	0.801215	0.718321	0.791068	0.834175	0.774575	0.783404	0.814962	0.745505
			TM	1.59081	1.59081	1.59081	1.59081	1.59081	1.59081	1.59081	1.59081	1.59081	1.59081	1.59081	1.59081	1.59081	1.59081	1.59081	1.59081	1.59081	1.59081	1.59081	1.59081	1.59081	1.59081	1.59081	1.59081	1.59007	1.59081	1.59081	1.59081	1.59081	1.59081	1.59081	1.59081	1.59081	1.59081	1.59081	1.59081	1.59081	1.59081	1.59081	1.59081	1.59081	1.59081	1.59081	1.59081	1.59081	1.59081
			UZ	0.937739	0.937739	0.937739	0.937739	0.937739	0.937739	0.937739	0.937739	0.937739	0.937739	0.937739	0.937739	0.937739	0.937739	0.937739	0.937739	0.937739	0.937739	0.937739	0.937739	0.937739	0.937739	0.937739	0.937739	0.937739	0.937308	0.937739	0.937739	0.937739	0.937739	0.937739	0.937739	0.937739	0.937739	0.937739	0.937739	0.937739	0.937739	0.937739	0.937739	0.937739	0.937739	0.937739	0.937739	0.937739	0.937739
			VN	0.721361	0.730604	0.693171	0.740461	0.705897	0.728015	0.677426	0.712998	0.741125	0.690135	0.712086	0.637878	0.609813	0.616033	0.656457	0.624027	0.639586	0.592285	0.632537	0.609713	0.65143	0.614159	0.610194	0.609299	0.592285	0.592285	0.592013	0.592285	0.746402	0.592285	0.75694	0.766051	0.745854	0.750767	0.714923	0.747497	0.755015	0.758732	0.729625	0.64083	0.71952	0.76245	0.703093	0.711887	0.743315	0.674141
		Europe	AZ	0.654262	0.654262	0.654262	0.654262	0.654262	0.654262	0.654262	0.654262	0.654262	0.654262	0.654262	0.654262	0.654262	0.654262	0.654262	0.654262	0.654262	0.654262	0.654262	0.654262	0.654262	0.654262	0.654262	0.654262	0.654262	0.654262	0.654262	0.653961	0.654262	0.654262	0.654262	0.654262	0.654262	0.654262	0.654262	0.654262	0.654262	0.654262	0.654262	0.654262	0.654262	0.654262	0.654262	0.654262	0.654262	0.654262
			BE	0.36548	0.418217	0.392894	0.412613	0.384202	0.36205	0.448362	0.429997	0.411061	0.452856	0.37855	0.503054	0.485618	0.500031	0.44119	0.491403	0.522273	0.333646	0.515719	0.482056	0.519396	0.496779	0.474686	0.487138	0.333646	0.333646	0.485373	0.333646	0.333492	0.333646	0.351415	0.360383	0.341728	0.34506	0.388826	0.341908	0.349487	0.353179	0.357574	0.523956	0.370054	0.356838	0.38845	0.396635	0.348033	0.447268
			CZ	0.9568	0.9568	0.9568	0.9568	0.9568	0.9568	0.9568	0.9568	0.9568	0.9568	0.9568	0.9568	0.9568	0.9568	0.9568	0.9568	0.9568	0.9568	0.9568	0.9568	0.9568	0.9568	0.9568	0.9568	0.9568	0.9568	0.9568	0.9568	0.9568	0.95636	0.9568	0.9568	0.9568	0.9568	0.9568	0.9568	0.9568	0.9568	0.9568	0.9568	0.9568	0.9568	0.9568	0.9568	0.9568	0.9568
			DK	0.366822	0.419532	0.394221	0.413931	0.385535	0.363393	0.449662	0.431306	0.41238	0.454153	0.379885	0.504326	0.486898	0.501304	0.442493	0.49268	0.523534	0.324638	0.516984	0.483338	0.520659	0.498054	0.475972	0.488417	0.324638	0.324638	0.486653	0.324638	0.342396	0.324638	0.324489	0.343278	0.343066	0.339441	0.390156	0.341694	0.33567	0.335604	0.35892	0.525216	0.371394	0.339751	0.38978	0.397961	0.349384	0.448568
			FI	0.433548	0.48644	0.461041	0.480819	0.452324	0.430107	0.516674	0.498255	0.479262	0.521181	0.446655	0.571528	0.55404	0.568496	0.50948	0.559842	0.590804	0.382214	0.584231	0.550467	0.587919	0.565235	0.543076	0.555565	0.382214	0.382214	0.553794	0.382214	0.409038	0.382214	0.400928	0.382038	0.409709	0.406072	0.456961	0.408333	0.402075	0.398078	0.425618	0.592492	0.438135	0.393245	0.456585	0.464794	0.41605	0.515576
			FR	0.467798	0.520856	0.495378	0.515218	0.486634	0.464346	0.551187	0.532709	0.513657	0.555708	0.480947	0.606216	0.588672	0.603174	0.54397	0.594492	0.625553	0.436292	0.618959	0.585087	0.622659	0.599902	0.577672	0.590201	0.436292	0.436292	0.588425	0.436292	0.444443	0.436292	0.454863	0.463886	0.436091	0.448749	0.491285	0.445512	0.452957	0.456638	0.459843	0.627246	0.4724	0.46032	0.490907	0.499142	0.450294	0.550085
			DE	0.652652	0.706275	0.680525	0.700577	0.671688	0.649164	0.736929	0.718254	0.698998	0.741499	0.66594	0.792549	0.774817	0.789475	0.729635	0.7807	0.812095	0.615862	0.80543	0.771194	0.80917	0.786167	0.763699	0.776362	0.615862	0.615862	0.774567	0.615862	0.627522	0.615862	0.630977	0.640095	0.628486	0.615579	0.676389	0.626974	0.629034	0.632771	0.644613	0.813807	0.657303	0.636491	0.676007	0.684329	0.634913	0.735816
			IT	0.877574	0.944158	0.8752	0.93845	0.870201	0.88429	0.932355	0.956316	0.93685	0.951904	0.869713	0.988719	0.970749	0.985603	0.924963	0.976711	1.00853	0.845986	1.00177	0.967077	1.00556	0.982252	0.959482	0.972315	0.845986	0.845986	0.970496	0.845986	0.902942	0.845986	0.913632	0.922875	0.902386	0.907369	0.845597	0.904053	0.911679	0.915451	0.885923	1.01026	0.875284	0.919222	0.870218	0.878567	0.899811	0.931227
			NL	0.515251	0.568453	0.542905	0.562799	0.534137	0.51179	0.598866	0.580338	0.561234	0.603399	0.528435	0.654045	0.636453	0.650995	0.591629	0.64229	0.673436	0.48202	0.666824	0.632859	0.670534	0.647714	0.625424	0.637987	0.48202	0.48202	0.636206	0.48202	0.490383	0.48202	0.499265	0.508313	0.491273	0.49302	0.538802	0.481798	0.497238	0.501045	0.507274	0.675134	0.519865	0.504737	0.538423	0.54668	0.49765	0.597761
			NO	0.149288	0.201323	0.176337	0.195793	0.167761	0.145903	0.231064	0.212945	0.194262	0.235497	0.162184	0.285021	0.267819	0.282038	0.223988	0.273526	0.303979	0.109554	0.297515	0.264305	0.301142	0.27883	0.257035	0.269319	0.109554	0.109554	0.267578	0.109554	0.125142	0.109554	0.120403	0.129042	0.125835	0.12224	0.172323	0.124368	0.109503	0.121934	0.141486	0.30564	0.153802	0.125561	0.171952	0.180028	0.132073	0.229984
			PL	0.998837	1.05352	1.02726	1.04771	1.01825	0.99528	1.08478	1.06574	1.0461	1.08945	1.01239	1.14152	1.12343	1.13838	1.07735	1.12943	1.16145	0.953129	1.15465	1.11973	1.15847	1.13501	1.11209	1.125	0.953129	0.953129	1.12317	0.953129	0.9735	0.953129	0.964626	0.969639	0.974194	0.970435	1.02304	0.972772	0.966303	0.952691	0.990639	1.1632	1.00358	0.965981	1.02265	1.03114	0.980748	1.08365
			PT	0.825575	0.880657	0.853761	0.874911	0.844824	0.822115	0.9108	0.892754	0.873315	0.916262	0.839012	0.967051	0.949117	0.963941	0.903424	0.955067	0.986819	0.809732	0.980078	0.945453	0.98386	0.960596	0.937873	0.95068	0.809732	0.809732	0.948865	0.809732	0.834427	0.809732	0.845093	0.854315	0.833872	0.838844	0.849578	0.835535	0.843144	0.846907	0.809359	0.988551	0.830278	0.85067	0.849192	0.857608	0.831303	0.909675
			RU	0.762849	0.771198	0.73465	0.781058	0.74738	0.769505	0.7189	0.753587	0.781722	0.730717	0.75357	0.658435	0.643171	0.630132	0.697925	0.651715	0.617309	0.594569	0.61001	0.648447	0.668738	0.633699	0.651715	0.651151	0.594569	0.594569	0.643122	0.594569	0.787897	0.594569	0.798438	0.807552	0.787349	0.792263	0.756409	0.788992	0.796512	0.800231	0.771115	0.594296	0.761006	0.80395	0.744575	0.753371	0.784809	0.715615
			ES	0.686869	0.751803	0.7073	0.746152	0.698434	0.692535	0.763888	0.763838	0.744568	0.783243	0.692851	0.81969	0.801899	0.816606	0.75657	0.807802	0.8393	0.673791	0.832613	0.798265	0.836365	0.813287	0.790745	0.80345	0.673791	0.673791	0.801649	0.673791	0.711	0.673791	0.721583	0.730734	0.71045	0.715383	0.702767	0.7121	0.71965	0.723383	0.694151	0.841018	0.673482	0.727117	0.702767	0.711017	0.7079	0.762771
			SE	0.226804	0.279059	0.253967	0.273506	0.245355	0.223405	0.308927	0.290731	0.271968	0.31338	0.239754	0.363115	0.34584	0.360119	0.30182	0.351571	0.382155	0.179637	0.375662	0.34231	0.379305	0.356898	0.335009	0.347345	0.179637	0.179637	0.345597	0.179637	0.202588	0.179637	0.194592	0.190496	0.203252	0.199658	0.249936	0.201892	0.195725	0.191775	0.218969	0.383822	0.231337	0.179554	0.249564	0.257674	0.209516	0.307843
			TR	0.825153	0.891571	0.811241	0.88588	0.812348	0.831882	0.86822	0.903693	0.884285	0.88771	0.816661	0.924412	0.906496	0.921305	0.860852	0.91244	0.944159	0.794089	0.937425	0.902836	0.941203	0.917964	0.895265	0.908058	0.794089	0.794089	0.906245	0.794089	0.850479	0.794089	0.861137	0.870352	0.849925	0.854893	0.818238	0.851586	0.85919	0.86295	0.83351	0.945889	0.82329	0.86671	0.793724	0.811526	0.847357	0.867096
			UA	0.546813	0.612233	0.533708	0.606636	0.534203	0.553531	0.589747	0.624153	0.605067	0.608914	0.538461	0.645006	0.627389	0.641951	0.5825	0.633233	0.664424	0.508145	0.657802	0.623789	0.661518	0.638665	0.616343	0.628924	0.508145	0.508145	0.627141	0.508145	0.57182	0.508145	0.582302	0.591365	0.571275	0.576162	0.540029	0.57291	0.580387	0.584085	0.555132	0.666125	0.544981	0.587783	0.525241	0.507911	0.56875	0.588641
			GB	0.454744	0.507769	0.482307	0.502134	0.473568	0.451295	0.53808	0.519614	0.500574	0.542598	0.467884	0.593074	0.575542	0.590034	0.530868	0.581358	0.612399	0.425773	0.605809	0.57196	0.609507	0.586764	0.564549	0.57707	0.425773	0.425773	0.575295	0.425773	0.440257	0.425773	0.450687	0.459704	0.439764	0.444577	0.478217	0.441341	0.448781	0.452461	0.446794	0.614092	0.459343	0.45614	0.477839	0.486069	0.425577	0.536979
		Middle East	IR	0.77116	0.803164	0.742828	0.813072	0.755618	0.777847	0.741511	0.785468	0.813739	0.76072	0.761838	0.780916	0.762838	0.777547	0.709732	0.768958	0.800245	0.680294	0.793557	0.759203	0.797677	0.774228	0.751682	0.764389	0.680294	0.680294	0.762588	0.680294	0.796326	0.680294	0.806917	0.816074	0.795776	0.800712	0.764689	0.797427	0.804982	0.808718	0.779465	0.801963	0.769308	0.812455	0.752799	0.761637	0.793224	0.679981
			IQ	1.06341	1.09596	1.0346	1.10604	1.0476	1.07021	1.03326	1.07796	1.10672	1.05279	1.05393	1.07333	1.05495	1.06991	1.00096	1.06117	1.09299	0.971408	1.08619	1.05125	1.09038	1.06653	1.0436	1.05653	0.971408	0.971408	1.05469	0.971408	1.08901	0.971408	1.09978	1.10909	1.08845	1.09347	1.05683	1.09013	1.09781	1.10161	1.07186	1.09474	1.06153	1.10541	1.04474	1.05373	1.08585	0.980412
			IL	0.481363	0.546473	0.453968	0.540898	0.466218	0.48799	0.509797	0.553299	0.539335	0.528891	0.472303	0.564846	0.547296	0.561803	0.502577	0.553118	0.58419	0.445038	0.577594	0.54371	0.581295	0.55853	0.536292	0.548825	0.445038	0.445038	0.547049	0.445038	0.506212	0.445038	0.516655	0.525684	0.505669	0.510537	0.474753	0.507297	0.514747	0.518431	0.489586	0.585885	0.479538	0.522115	0.462666	0.471365	0.503153	0.508695
			KW	0.688528	0.72038	0.660331	0.73024	0.67306	0.695184	0.65902	0.702769	0.730904	0.678139	0.679251	0.698238	0.680246	0.694885	0.627392	0.686337	0.717475	0.598806	0.710819	0.676628	0.714919	0.691582	0.669144	0.68179	0.598806	0.598806	0.679997	0.598806	0.713574	0.598806	0.724115	0.733228	0.713027	0.71794	0.682089	0.71467	0.722189	0.725908	0.696794	0.719185	0.686686	0.729626	0.670255	0.679051	0.710487	0.60793
			OM	0.580057	0.611727	0.552021	0.621531	0.564678	0.586675	0.550718	0.594217	0.622191	0.569727	0.570833	0.589893	0.572004	0.586559	0.520424	0.578061	0.60902	0.502313	0.602402	0.568407	0.606413	0.583275	0.560965	0.573539	0.502313	0.502313	0.571757	0.502313	0.60496	0.502313	0.615441	0.624502	0.604416	0.609301	0.573655	0.60605	0.613526	0.617223	0.588276	0.61072	0.578226	0.62092	0.561889	0.570635	0.601891	0.521447
			QA	0.555947	0.587558	0.527963	0.597343	0.540596	0.562552	0.526662	0.57008	0.598002	0.545636	0.546739	0.565583	0.547728	0.562256	0.495271	0.553773	0.584675	0.470497	0.578069	0.544137	0.582138	0.558978	0.536708	0.549259	0.470497	0.470497	0.547481	0.470497	0.580804	0.470497	0.591264	0.600309	0.58026	0.585136	0.549556	0.581891	0.589353	0.593043	0.56415	0.586372	0.554119	0.596734	0.537812	0.546542	0.57774	0.483908
			SA	0.681022	0.746839	0.652769	0.7412	0.665523	0.687691	0.691101	0.735095	0.73962	0.710411	0.671726	0.746773	0.729024	0.743695	0.6838	0.734912	0.766337	0.63665	0.759666	0.725397	0.763409	0.740385	0.717896	0.73057	0.63665	0.63665	0.728774	0.63665	0.706119	0.63665	0.716681	0.725813	0.705571	0.710494	0.67457	0.707217	0.714752	0.718478	0.689305	0.76805	0.679176	0.722204	0.662713	0.671527	0.703026	0.689987
			AE	0.604047	0.635748	0.575983	0.645561	0.588652	0.610671	0.574678	0.61822	0.646222	0.593706	0.594813	0.61371	0.595804	0.610373	0.543216	0.601866	0.632857	0.51856	0.626232	0.592203	0.630313	0.607086	0.584754	0.59734	0.51856	0.51856	0.595556	0.51856	0.628974	0.51856	0.639465	0.648535	0.628429	0.633319	0.597638	0.630065	0.637548	0.641249	0.612273	0.634558	0.602213	0.64495	0.58586	0.594615	0.625902	0.533439
		North America	CA	0.455685	0.494409	0.483218	0.488896	0.474488	0.451009	0.538931	0.506241	0.487337	0.529133	0.468811	0.593865	0.576352	0.590828	0.531726	0.582162	0.58377	0.406553	0.589926	0.572773	0.591255	0.587562	0.565371	0.577878	0.406553	0.406553	0.576105	0.406553	0.451632	0.406553	0.456472	0.46548	0.451173	0.454503	0.479132	0.452715	0.453913	0.458244	0.448268	0.584411	0.460279	0.46192	0.478755	0.486976	0.446103	0.537831
			MX	0.693537	0.719468	0.721394	0.714056	0.712562	0.688524	0.765776	0.727088	0.712478	0.746249	0.706817	0.788808	0.797826	0.788161	0.770475	0.797975	0.761923	0.602021	0.76815	0.803174	0.769495	0.789888	0.804519	0.808555	0.602021	0.602021	0.797178	0.602021	0.693271	0.602021	0.699065	0.708179	0.692806	0.697073	0.71726	0.694367	0.696475	0.700858	0.686283	0.762571	0.698185	0.704576	0.716878	0.725196	0.687959	0.776652
			TT	0.610204	0.624827	0.637961	0.620046	0.629161	0.604315	0.669991	0.631427	0.618475	0.650534	0.623437	0.723552	0.731859	0.722906	0.686867	0.732687	0.696762	0.542935	0.702967	0.728252	0.704307	0.724627	0.720788	0.733398	0.542935	0.542935	0.731611	0.542935	0.615811	0.542935	0.624727	0.633809	0.615266	0.620162	0.633842	0.616903	0.622147	0.626514	0.604464	0.697407	0.614835	0.63022	0.633462	0.64175	0.611643	0.693022
			US	0.746059	0.772455	0.774004	0.767009	0.765144	0.741013	0.820175	0.780882	0.765427	0.800586	0.759381	0.844031	0.853077	0.843381	0.82324	0.853227	0.81706	0.655727	0.823307	0.858442	0.824656	0.845114	0.857393	0.86384	0.655727	0.655727	0.852428	0.655727	0.745776	0.655727	0.751588	0.76073	0.745309	0.749589	0.769857	0.746875	0.74899	0.753386	0.738765	0.81771	0.750722	0.757116	0.769474	0.777818	0.740447	0.829437
		South America	AR	0.72655	0.704627	0.754443	0.707951	0.7456	0.720351	0.725204	0.695852	0.70732	0.705658	0.739848	0.780311	0.792182	0.808726	0.770652	0.791052	0.800296	0.623116	0.80688	0.788042	0.763104	0.797819	0.785498	0.797785	0.623116	0.623116	0.794776	0.623116	0.73905	0.623116	0.749606	0.758732	0.738502	0.743422	0.750304	0.740147	0.747678	0.751401	0.723326	0.810106	0.731205	0.755125	0.749922	0.75825	0.735826	0.778649
			BO	0.483847	0.483847	0.483847	0.483847	0.483847	0.483847	0.483847	0.483847	0.483847	0.483847	0.483847	0.483847	0.483847	0.483847	0.483847	0.483847	0.483847	0.483847	0.483847	0.483847	0.483847	0.483847	0.483847	0.483847	0.483847	0.483847	0.483847	0.483847	0.483847	0.483847	0.483847	0.483847	0.483847	0.483847	0.483847	0.483847	0.483847	0.483847	0.483847	0.483847	0.483847	0.483847	0.483847	0.483847	0.483847	0.483847
			BR	0.604652	0.587302	0.632381	0.588558	0.623589	0.598472	0.617492	0.583866	0.587583	0.598059	0.617872	0.68626	0.684079	0.700525	0.662675	0.682955	0.721734	0.524587	0.716527	0.679963	0.683946	0.695385	0.677434	0.689649	0.524587	0.524587	0.686657	0.524587	0.617079	0.524587	0.627572	0.636645	0.616533	0.621425	0.628266	0.618169	0.625655	0.629357	0.60148	0.724792	0.609279	0.633059	0.627886	0.636165	0.613807	0.670624
			CL	0.909767	0.896747	1.02435	0.901797	0.928996	0.905908	0.990692	0.887016	0.900925	0.987637	0.92319	0.932806	0.956753	0.961872	0.992236	0.948144	0.94467	0.781854	0.955948	0.960815	0.913391	0.950594	0.957257	0.969089	0.781854	0.781854	0.966051	0.781854	0.912703	0.781854	0.919868	0.92908	0.912233	0.917116	0.933745	0.913811	0.91725	0.92168	0.903223	0.949386	0.914465	0.925439	0.933359	0.941767	0.907569	1.01001
			PE	0.61838	0.636215	0.760511	0.63131	0.637305	0.614582	0.727387	0.63316	0.629741	0.724381	0.631591	0.667758	0.688338	0.685514	0.728907	0.683333	0.659435	0.51153	0.665958	0.693095	0.648634	0.680493	0.694482	0.703105	0.51153	0.51153	0.69511	0.51153	0.62127	0.51153	0.628321	0.637387	0.620808	0.625613	0.641978	0.62236	0.625745	0.630105	0.61194	0.661714	0.623004	0.633804	0.641599	0.649872	0.616217	0.746402
			VE	0.839218	0.854037	0.867348	0.849192	0.858429	0.833251	0.899808	0.860726	0.8476	0.88009	0.852629	0.954094	0.962514	0.95344	0.916913	0.963353	0.926941	0.77074	0.93323	0.958858	0.934589	0.955185	0.951293	0.964074	0.77074	0.77074	0.962263	0.77074	0.844901	0.77074	0.853937	0.86314	0.844348	0.84931	0.863174	0.846007	0.851321	0.855747	0.833402	0.927595	0.843912	0.859502	0.862788	0.871188	0.840677	0.923151
	Blue_Renew_MDONH3ship
		GHG [kgCO2e/kgNH3]	Destination	Africa											Asia-Pacific																Europe																		Middle East
		Origin		DZ	AO	EG	GQ	LY	MA	MZ	NA	NG	ZA	TN	AU	BN	CN	IN	ID	JP	KZ	KR	MY	PG	PH	SG	TH	TM	UZ	VN	AZ	BE	CZ	DK	FI	FR	DE	IT	NL	NO	PL	PT	RU	ES	SE	TR	UA	GB	IR
		Africa	DZ	0.806776	0.874605	0.839687	0.869411	0.831522	0.820125	0.891707	0.885669	0.867955	0.907248	0.826237	0.943009	0.926653	0.940173	0.88498	0.932079	0.961039	0.807147	0.954891	0.923311	0.958341	0.937123	0.916398	0.928078	0.807147	0.807147	0.926423	0.807147	0.837098	0.807147	0.846826	0.855238	0.836593	0.841127	0.835903	0.838109	0.845049	0.848481	0.821611	0.962618	0.819206	0.851913	0.83552	0.843104	0.834249	0.890681
			AO	0.451343	0.385586	0.476369	0.401566	0.468435	0.445318	0.44766	0.408097	0.402237	0.430122	0.463274	0.50972	0.507751	0.522593	0.488435	0.506737	0.542925	0.385763	0.537033	0.504037	0.525367	0.517954	0.501755	0.512778	0.385763	0.385763	0.510078	0.385763	0.462976	0.385763	0.472446	0.480635	0.462484	0.466898	0.472655	0.46396	0.470716	0.474057	0.448659	0.544492	0.455519	0.477398	0.472312	0.479784	0.460202	0.495609
			EG	0.736663	0.7969	0.70403	0.791739	0.722478	0.742766	0.762479	0.802747	0.790293	0.780153	0.728155	0.813436	0.79719	0.810619	0.755796	0.80258	0.831344	0.704354	0.825238	0.793871	0.828664	0.807589	0.787004	0.798606	0.704354	0.704354	0.796961	0.704354	0.759632	0.704354	0.769298	0.777656	0.75913	0.763635	0.730757	0.760637	0.767533	0.770943	0.744243	0.832913	0.734973	0.774353	0.719906	0.727972	0.756801	0.761459
			GQ	0.80589	0.760127	0.831501	0.743546	0.823381	0.799557	0.81636	0.775919	0.752285	0.798412	0.8181	0.879879	0.877864	0.893056	0.858093	0.876825	0.91387	0.743888	0.907838	0.874062	0.895896	0.888307	0.871726	0.883009	0.743888	0.743888	0.880245	0.743888	0.817734	0.743888	0.827426	0.835805	0.81723	0.821748	0.8277	0.818741	0.825655	0.829074	0.803097	0.915473	0.810163	0.832493	0.827349	0.834996	0.814895	0.865436
			LY	0.977701	1.03891	0.971533	1.03366	0.952636	0.983917	1.02403	1.05008	1.0322	1.04199	0.967869	1.0758	1.0593	1.07294	1.01724	1.06477	1.094	0.953075	1.08779	1.05592	1.09128	1.06986	1.04895	1.06073	0.953075	0.953075	1.05906	0.953075	1.00105	0.953075	1.01087	1.01936	1.00054	1.00512	0.975351	1.00207	1.00907	1.01254	0.985416	1.09559	0.976001	1.016	0.96994	0.977578	0.998172	1.02299
			MA	1.00544	1.0543	1.03145	1.04887	1.0232	0.991821	1.08408	1.06548	1.04751	1.08717	1.01784	1.13599	1.11944	1.13312	1.07727	1.12493	1.15424	0.992277	1.14802	1.11606	1.15151	1.13004	1.10907	1.12088	0.992277	0.992277	1.11921	0.992277	1.01936	0.992277	1.0292	1.03771	1.01885	1.02343	1.02759	1.02038	1.0274	1.03087	1.00375	1.15583	1.00978	1.03435	1.02723	1.035	1.01648	1.08304
			MZ	0.667331	0.64674	0.641664	0.655713	0.653251	0.673389	0.583739	0.630713	0.656318	0.608299	0.658886	0.670382	0.661771	0.675096	0.632511	0.661545	0.695659	0.584008	0.6896	0.658478	0.685914	0.67209	0.651665	0.663176	0.584008	0.584008	0.661545	0.584008	0.690129	0.584008	0.699724	0.708019	0.689631	0.694103	0.661469	0.691126	0.697971	0.701356	0.674854	0.697216	0.665654	0.70474	0.650698	0.658704	0.687319	0.639459
			NA	0.474673	0.420615	0.494674	0.429525	0.491778	0.468628	0.444374	0.398077	0.430092	0.426823	0.486614	0.506482	0.504511	0.519365	0.485181	0.503496	0.539713	0.39826	0.533816	0.500795	0.522142	0.514722	0.498511	0.509542	0.39826	0.39826	0.50684	0.39826	0.4863	0.39826	0.495779	0.503974	0.485808	0.490226	0.496003	0.487286	0.494047	0.497391	0.471956	0.54128	0.478852	0.500735	0.49566	0.503138	0.483524	0.492361
			NG	0.784904	0.741332	0.810483	0.732814	0.802373	0.778685	0.797419	0.756998	0.724097	0.779493	0.797099	0.860859	0.858846	0.874019	0.8391	0.857809	0.894807	0.72443	0.888783	0.855049	0.876856	0.869277	0.852716	0.863985	0.72443	0.72443	0.861225	0.72443	0.796733	0.72443	0.806413	0.814782	0.79623	0.800742	0.806687	0.797739	0.804644	0.808059	0.782115	0.896409	0.789172	0.811474	0.806336	0.813974	0.793897	0.846434
			ZA	1.47118	1.41479	1.44654	1.42421	1.45871	1.4646	1.39307	1.39796	1.42485	1.36678	1.46464	1.46244	1.45868	1.47448	1.43645	1.4576	1.49612	1.36741	1.48985	1.45473	1.4791	1.46954	1.45135	1.46344	1.36741	1.36741	1.46116	1.36741	1.4834	1.36741	1.49348	1.5022	1.48288	1.48757	1.46735	1.48445	1.49164	1.4952	1.46814	1.49778	1.47175	1.49875	1.45603	1.46444	1.48045	1.44408
			TN	0.831665	0.892314	0.836554	0.887117	0.827206	0.83781	0.888589	0.903383	0.885661	0.906388	0.812195	0.939906	0.923545	0.937069	0.881859	0.928973	0.957941	0.812568	0.951791	0.920202	0.955241	0.934017	0.913287	0.924971	0.812568	0.812568	0.923315	0.812568	0.854791	0.812568	0.864523	0.872938	0.854285	0.858822	0.834178	0.855802	0.862745	0.866179	0.839297	0.95952	0.830133	0.869612	0.833198	0.840783	0.85194	0.887562
		Asia-Pacific	AU	0.855948	0.847579	0.830048	0.856634	0.84174	0.862062	0.808008	0.831405	0.857244	0.812001	0.847426	0.720516	0.754976	0.76424	0.796577	0.745118	0.77352	0.720847	0.772011	0.756226	0.745271	0.753772	0.75653	0.765932	0.720847	0.720847	0.762762	0.720847	0.878955	0.720847	0.888638	0.89701	0.878452	0.882966	0.850033	0.879962	0.886869	0.890285	0.863541	0.779539	0.854256	0.893701	0.839164	0.847243	0.876119	0.812824
			BN	0.798571	0.80444	0.772741	0.813472	0.784401	0.804668	0.758315	0.788308	0.81408	0.767359	0.790072	0.714086	0.67974	0.705363	0.739102	0.700804	0.722809	0.680053	0.716943	0.691489	0.726092	0.697568	0.696869	0.701731	0.680053	0.680053	0.696139	0.680053	0.821515	0.680053	0.831172	0.83952	0.821014	0.825515	0.792672	0.822519	0.829408	0.832814	0.806143	0.724603	0.796883	0.83622	0.781832	0.78989	0.818687	0.755305
			CN	0.943516	0.951168	0.917467	0.960276	0.929226	0.949665	0.902919	0.934899	0.96089	0.913772	0.934945	0.854118	0.836006	0.810089	0.883544	0.843576	0.842702	0.810461	0.835715	0.838963	0.865214	0.82836	0.840879	0.841415	0.810461	0.810461	0.832451	0.810461	0.966656	0.810461	0.976394	0.984814	0.96615	0.970689	0.937567	0.967668	0.974615	0.978051	0.951152	0.843361	0.941814	0.981486	0.926635	0.934761	0.963803	0.899884
			IN	1.08207	1.11016	1.05571	1.11938	1.06761	1.08829	1.05312	1.09369	1.12	1.07067	1.0734	1.08038	1.06356	1.07725	1.00277	1.06926	1.09836	1.00324	1.09214	1.06018	1.09591	1.07416	1.05318	1.06501	1.00324	1.00324	1.06333	1.00324	1.10549	1.00324	1.11534	1.12386	1.10497	1.10957	1.07605	1.10651	1.11354	1.11702	1.0898	1.09996	1.08035	1.12049	1.06499	1.07321	1.1026	1.03069
			ID	1.00004	0.999483	0.973883	1.00863	0.985689	1.00621	0.953597	0.983149	1.00924	0.961939	0.991431	0.899095	0.895602	0.907818	0.940023	0.874155	0.921989	0.874558	0.919988	0.897418	0.913311	0.896833	0.897464	0.907233	0.874558	0.874558	0.904064	0.874558	1.02327	0.874558	1.03305	1.0415	1.02276	1.02732	0.994064	1.02429	1.03126	1.03471	1.0077	0.92762	0.998328	1.03816	0.983088	0.991246	1.02041	0.956429
			JP	0.99026	0.997956	0.964164	1.00708	0.975944	0.996419	0.94959	0.981658	1.0077	0.960494	0.981673	0.88916	0.87929	0.868377	0.930181	0.883388	0.835695	0.836079	0.852877	0.883864	0.895469	0.87005	0.887533	0.887333	0.836079	0.836079	0.879904	0.836079	1.01344	0.836079	1.0232	1.03163	1.01293	1.01748	0.9843	1.01445	1.02141	1.02486	0.99791	0.857174	0.988555	1.0283	0.973349	0.981489	1.01058	0.94655
			KZ	0.797773	0.797773	0.797773	0.797773	0.797773	0.797773	0.797773	0.797773	0.797773	0.797773	0.797773	0.797773	0.797773	0.797773	0.797773	0.797773	0.797773	0.797406	0.797773	0.797773	0.797773	0.797773	0.797773	0.797773	0.797773	0.797773	0.797773	0.797773	0.797773	0.797773	0.797773	0.797773	0.797773	0.797773	0.797773	0.797773	0.797773	0.797773	0.797773	0.797773	0.797773	0.797773	0.797773	0.797773	0.797773	0.797773
			KR	0.957445	0.96522	0.931395	0.974329	0.943155	0.963594	0.916846	0.94895	0.974942	0.927823	0.948874	0.861147	0.846896	0.83493	0.89747	0.85491	0.826441	0.809677	0.809305	0.851861	0.870664	0.838224	0.854696	0.854374	0.809677	0.809677	0.846912	0.809677	0.980586	0.809677	0.990325	0.998745	0.98008	0.984619	0.951496	0.981598	0.988546	0.991981	0.965082	0.82399	0.955743	0.995417	0.940563	0.94869	0.977733	0.913811
			MY	0.740104	0.745483	0.714365	0.754482	0.725985	0.74618	0.69999	0.729408	0.755088	0.708533	0.731635	0.66046	0.636701	0.653449	0.680845	0.64777	0.672424	0.625315	0.666972	0.625027	0.674848	0.647391	0.638593	0.645468	0.625315	0.625315	0.641243	0.625315	0.762967	0.625315	0.772589	0.780908	0.762467	0.766952	0.734226	0.763967	0.770831	0.774226	0.747649	0.674514	0.738422	0.77762	0.723424	0.731454	0.760149	0.696991
			PG	0.891155	0.883522	0.865219	0.89259	0.876927	0.897277	0.843576	0.867326	0.893201	0.847895	0.882621	0.765072	0.786842	0.795111	0.831718	0.779015	0.799627	0.740614	0.801321	0.790534	0.740273	0.784629	0.790717	0.800085	0.740614	0.740614	0.79505	0.740614	0.914193	0.740614	0.923889	0.932272	0.91369	0.918209	0.885232	0.915201	0.922118	0.925538	0.898758	0.808859	0.88946	0.928959	0.874347	0.882438	0.911354	0.848048
			PH	0.871809	0.877717	0.845874	0.886786	0.857582	0.877931	0.831389	0.86152	0.887397	0.840486	0.863276	0.775355	0.759976	0.76019	0.812099	0.764446	0.776133	0.742381	0.770793	0.764645	0.786402	0.742039	0.769527	0.769878	0.742381	0.742381	0.762539	0.742381	0.894848	0.742381	0.904543	0.912926	0.894344	0.898863	0.865886	0.895855	0.902772	0.906192	0.879412	0.778407	0.870115	0.909613	0.855002	0.863093	0.892008	0.828367
			SG	0.832014	0.84197	0.806114	0.851027	0.817806	0.838128	0.791649	0.825794	0.851637	0.803873	0.823492	0.759049	0.74023	0.753594	0.772384	0.74602	0.774426	0.72336	0.768117	0.73674	0.773405	0.75047	0.723027	0.74151	0.72336	0.72336	0.739849	0.72336	0.855022	0.72336	0.864704	0.873076	0.854519	0.859032	0.826099	0.856028	0.862936	0.866351	0.839607	0.775889	0.830322	0.869767	0.81523	0.823309	0.852186	0.788631
			TH	0.781291	0.790858	0.755492	0.79988	0.767138	0.787381	0.741083	0.774746	0.800487	0.75326	0.772802	0.706408	0.683154	0.69214	0.721892	0.693703	0.712162	0.661505	0.705756	0.681712	0.720663	0.688846	0.679572	0.661201	0.661505	0.661505	0.677098	0.661505	0.804208	0.661505	0.813853	0.822192	0.803707	0.808203	0.775399	0.805211	0.812091	0.815493	0.788854	0.7133	0.779605	0.818896	0.764572	0.77262	0.801383	0.738076
			TM	1.59081	1.59081	1.59081	1.59081	1.59081	1.59081	1.59081	1.59081	1.59081	1.59081	1.59081	1.59081	1.59081	1.59081	1.59081	1.59081	1.59081	1.59081	1.59081	1.59081	1.59081	1.59081	1.59081	1.59081	1.59007	1.59081	1.59081	1.59081	1.59081	1.59081	1.59081	1.59081	1.59081	1.59081	1.59081	1.59081	1.59081	1.59081	1.59081	1.59081	1.59081	1.59081	1.59081	1.59081	1.59081	1.59081
			UZ	0.937739	0.937739	0.937739	0.937739	0.937739	0.937739	0.937739	0.937739	0.937739	0.937739	0.937739	0.937739	0.937739	0.937739	0.937739	0.937739	0.937739	0.937739	0.937739	0.937739	0.937739	0.937739	0.937739	0.937739	0.937739	0.937308	0.937739	0.937739	0.937739	0.937739	0.937739	0.937739	0.937739	0.937739	0.937739	0.937739	0.937739	0.937739	0.937739	0.937739	0.937739	0.937739	0.937739	0.937739	0.937739	0.937739
			VN	0.709894	0.718315	0.68421	0.727296	0.695804	0.715956	0.669865	0.702274	0.7279	0.681443	0.701443	0.633833	0.608265	0.613931	0.65076	0.621215	0.63539	0.592285	0.628967	0.608174	0.646181	0.612224	0.608612	0.607796	0.592285	0.592285	0.592013	0.592285	0.732708	0.592285	0.74231	0.750611	0.732209	0.736685	0.704028	0.733706	0.740556	0.743943	0.717423	0.636523	0.708216	0.74733	0.693249	0.701262	0.729896	0.666872
		Europe	AZ	0.654262	0.654262	0.654262	0.654262	0.654262	0.654262	0.654262	0.654262	0.654262	0.654262	0.654262	0.654262	0.654262	0.654262	0.654262	0.654262	0.654262	0.654262	0.654262	0.654262	0.654262	0.654262	0.654262	0.654262	0.654262	0.654262	0.654262	0.653961	0.654262	0.654262	0.654262	0.654262	0.654262	0.654262	0.654262	0.654262	0.654262	0.654262	0.654262	0.654262	0.654262	0.654262	0.654262	0.654262	0.654262	0.654262
			BE	0.362612	0.410587	0.387549	0.405489	0.379643	0.359491	0.43801	0.421303	0.404077	0.442098	0.374501	0.487765	0.471903	0.485014	0.431485	0.477165	0.505248	0.333646	0.499286	0.468662	0.502631	0.482056	0.461957	0.473285	0.333646	0.333646	0.47168	0.333646	0.333492	0.333646	0.349816	0.357975	0.341004	0.344036	0.383849	0.341168	0.348063	0.351421	0.355419	0.506779	0.366773	0.35475	0.383507	0.390953	0.34674	0.437014
			CZ	0.9568	0.9568	0.9568	0.9568	0.9568	0.9568	0.9568	0.9568	0.9568	0.9568	0.9568	0.9568	0.9568	0.9568	0.9568	0.9568	0.9568	0.9568	0.9568	0.9568	0.9568	0.9568	0.9568	0.9568	0.9568	0.9568	0.9568	0.9568	0.9568	0.95636	0.9568	0.9568	0.9568	0.9568	0.9568	0.9568	0.9568	0.9568	0.9568	0.9568	0.9568	0.9568	0.9568	0.9568	0.9568	0.9568
			DK	0.363017	0.410965	0.387941	0.40587	0.380038	0.359898	0.438373	0.421675	0.404458	0.442458	0.374899	0.488099	0.472246	0.48535	0.431851	0.477506	0.505573	0.324638	0.499614	0.469007	0.502957	0.482394	0.462307	0.473628	0.324638	0.324638	0.472023	0.324638	0.340798	0.324638	0.324489	0.3416	0.341407	0.338109	0.384242	0.340159	0.334679	0.334619	0.355828	0.507103	0.367176	0.338392	0.3839	0.391342	0.347154	0.437378
			FI	0.428932	0.477062	0.453951	0.471948	0.446019	0.425801	0.504575	0.487814	0.470531	0.508676	0.44086	0.554492	0.538578	0.551733	0.498029	0.543858	0.572033	0.382214	0.566052	0.535327	0.569408	0.548765	0.5286	0.539965	0.382214	0.382214	0.538354	0.382214	0.406629	0.382214	0.39925	0.382038	0.40724	0.403931	0.450238	0.405988	0.400293	0.396656	0.421716	0.573569	0.433107	0.392258	0.449895	0.457365	0.41301	0.503576
			FR	0.464978	0.513275	0.490083	0.508142	0.482123	0.461836	0.540883	0.524063	0.506721	0.544998	0.476946	0.590975	0.575005	0.588206	0.534314	0.580303	0.608577	0.436292	0.602575	0.571742	0.605943	0.585227	0.564992	0.576397	0.436292	0.436292	0.57478	0.436292	0.44372	0.436292	0.453204	0.461417	0.436091	0.447639	0.486357	0.444692	0.451469	0.45482	0.457737	0.610119	0.469167	0.458171	0.486013	0.493509	0.449045	0.53988
			DE	0.649395	0.698256	0.674793	0.693064	0.666741	0.646217	0.726189	0.709172	0.691626	0.730353	0.661503	0.776872	0.760713	0.77407	0.719542	0.766074	0.794682	0.615862	0.788609	0.757412	0.792017	0.771056	0.750582	0.762121	0.615862	0.615862	0.760486	0.615862	0.626498	0.615862	0.629645	0.637954	0.627375	0.615579	0.671024	0.625998	0.627875	0.63128	0.64207	0.796243	0.653633	0.63467	0.670676	0.678259	0.633232	0.725175
			IT	0.87482	0.93557	0.872655	0.930362	0.868094	0.880948	0.924801	0.946663	0.928903	0.942638	0.867648	0.976228	0.959831	0.973385	0.918057	0.965271	0.994302	0.845986	0.988139	0.956482	0.991597	0.970327	0.949552	0.96126	0.845986	0.845986	0.959601	0.845986	0.897965	0.845986	0.907719	0.916152	0.897458	0.902005	0.845597	0.898979	0.905937	0.909378	0.882437	0.995885	0.872731	0.912819	0.868109	0.875726	0.895108	0.923772
			NL	0.512285	0.560725	0.537464	0.555577	0.529481	0.509134	0.588416	0.571546	0.554152	0.592544	0.524289	0.638658	0.62264	0.635881	0.581827	0.627954	0.656314	0.48202	0.650293	0.619368	0.653671	0.632893	0.612598	0.624036	0.48202	0.48202	0.622415	0.48202	0.489643	0.48202	0.49773	0.505968	0.490453	0.492044	0.533727	0.481798	0.495885	0.499351	0.505022	0.65786	0.516486	0.502712	0.533382	0.540901	0.49626	0.587411
			NO	0.145654	0.192926	0.170227	0.187903	0.162436	0.142579	0.219946	0.203485	0.186512	0.223974	0.157369	0.268965	0.253338	0.266256	0.213517	0.258523	0.286189	0.109554	0.280316	0.250145	0.283611	0.263341	0.24354	0.2547	0.109554	0.109554	0.253118	0.109554	0.123717	0.109554	0.119412	0.127261	0.124347	0.121081	0.166581	0.123014	0.109503	0.120803	0.138566	0.287698	0.149754	0.124098	0.166244	0.173581	0.130014	0.218965
			PL	0.994872	1.04479	1.02082	1.03949	1.01259	0.991625	1.07334	1.05595	1.03802	1.07759	1.00724	1.12513	1.10862	1.12227	1.06654	1.11409	1.14333	0.953129	1.13713	1.10524	1.14061	1.11919	1.09826	1.11006	0.953129	0.953129	1.10838	0.953129	0.971742	0.953129	0.963641	0.968217	0.972376	0.968944	1.01697	0.971077	0.965172	0.952691	0.987388	1.14493	0.999201	0.964878	1.01661	1.02436	0.978359	1.0723
			PT	0.824198	0.874443	0.849908	0.869201	0.841756	0.821042	0.901939	0.885478	0.867745	0.906921	0.836455	0.953253	0.936892	0.950416	0.89521	0.94232	0.971286	0.809732	0.965137	0.93355	0.968587	0.947365	0.926636	0.938318	0.809732	0.809732	0.936662	0.809732	0.832272	0.809732	0.842001	0.850414	0.831766	0.836302	0.846093	0.833283	0.840224	0.843656	0.809359	0.972866	0.828488	0.847089	0.84574	0.853417	0.829422	0.900912
			RU	0.747898	0.755505	0.722206	0.764489	0.733804	0.753963	0.707856	0.73946	0.765094	0.718622	0.739445	0.652766	0.63886	0.62698	0.688745	0.646644	0.615297	0.594569	0.608647	0.643667	0.662153	0.630229	0.646644	0.64613	0.594569	0.594569	0.638815	0.594569	0.77072	0.594569	0.780325	0.788629	0.770221	0.774698	0.742031	0.771719	0.77857	0.781958	0.75543	0.594296	0.74622	0.785347	0.731248	0.739263	0.767907	0.704863
			ES	0.685723	0.74491	0.704346	0.739759	0.696265	0.690887	0.755926	0.75588	0.738315	0.773568	0.691176	0.80679	0.790573	0.803979	0.749255	0.795954	0.824666	0.673791	0.81857	0.78726	0.82199	0.800954	0.780406	0.791987	0.673791	0.673791	0.790346	0.673791	0.707718	0.673791	0.717365	0.725705	0.707217	0.711714	0.700214	0.708721	0.715603	0.719006	0.692361	0.826231	0.673482	0.722409	0.700214	0.707733	0.704893	0.754908
			SE	0.222509	0.270002	0.247197	0.264955	0.239369	0.219419	0.297149	0.28061	0.263557	0.301195	0.234279	0.346398	0.330698	0.343676	0.290689	0.335907	0.363704	0.179637	0.357803	0.32749	0.361114	0.340748	0.320853	0.332066	0.179637	0.179637	0.330477	0.179637	0.2005	0.179637	0.193232	0.18951	0.201103	0.197837	0.243533	0.199867	0.194262	0.190672	0.215388	0.365219	0.226628	0.179554	0.243195	0.250566	0.206796	0.296163
			TR	0.822436	0.883017	0.809747	0.877826	0.810757	0.828574	0.861718	0.894073	0.876372	0.879495	0.814691	0.912972	0.896631	0.910139	0.854997	0.902052	0.930985	0.794089	0.924842	0.893292	0.928289	0.907091	0.886386	0.898055	0.794089	0.794089	0.896401	0.794089	0.845536	0.794089	0.855257	0.863663	0.84503	0.849562	0.816129	0.846546	0.853481	0.856911	0.830059	0.932562	0.820737	0.86034	0.793724	0.810007	0.842688	0.860693
			UA	0.543366	0.602939	0.531432	0.597843	0.531883	0.549483	0.582464	0.613794	0.596415	0.599918	0.535761	0.632784	0.616741	0.630003	0.575864	0.622064	0.650468	0.508145	0.644438	0.613464	0.647821	0.627011	0.606683	0.61814	0.508145	0.508145	0.616516	0.508145	0.566138	0.508145	0.575684	0.583937	0.565642	0.570092	0.537188	0.56713	0.57394	0.577307	0.550941	0.652017	0.541697	0.580675	0.523722	0.507911	0.563342	0.581456
			GB	0.452149	0.500413	0.477237	0.495284	0.469283	0.44901	0.528002	0.511194	0.493864	0.532115	0.46411	0.578059	0.5621	0.575292	0.521437	0.567395	0.595649	0.425773	0.589651	0.55884	0.593016	0.572315	0.552095	0.563491	0.425773	0.425773	0.561876	0.425773	0.438964	0.425773	0.448457	0.456664	0.438515	0.442895	0.473514	0.43995	0.446723	0.450071	0.444914	0.59719	0.456336	0.45342	0.47317	0.480661	0.425577	0.527
		Middle East	IR	0.763132	0.792306	0.737307	0.801337	0.748965	0.769228	0.736106	0.776175	0.801945	0.753616	0.754635	0.772025	0.755547	0.768954	0.707139	0.761126	0.789645	0.680294	0.783549	0.752233	0.787304	0.765929	0.745378	0.75696	0.680294	0.680294	0.755319	0.680294	0.786072	0.680294	0.795727	0.804074	0.785571	0.790071	0.757234	0.787076	0.793963	0.797369	0.770703	0.791211	0.761445	0.800775	0.746396	0.754452	0.783245	0.679981
			IQ	1.05542	1.08514	1.02912	1.09434	1.04099	1.06163	1.02789	1.06871	1.09496	1.04573	1.04677	1.06448	1.0477	1.06135	0.998404	1.05338	1.08243	0.971408	1.07622	1.04432	1.08005	1.05827	1.03734	1.04914	0.971408	0.971408	1.04746	0.971408	1.07879	0.971408	1.08863	1.09713	1.07828	1.08287	1.04942	1.07982	1.08683	1.0903	1.06314	1.08403	1.0537	1.09377	1.03838	1.04658	1.07591	0.979645
			IL	0.478112	0.537382	0.453175	0.532307	0.464326	0.484145	0.503996	0.543596	0.530884	0.521377	0.469865	0.554107	0.538131	0.551337	0.497423	0.543431	0.571717	0.445038	0.565712	0.534867	0.569081	0.548357	0.528114	0.539523	0.445038	0.445038	0.537906	0.445038	0.500732	0.445038	0.510238	0.518458	0.500238	0.504669	0.472095	0.50172	0.508502	0.511855	0.485597	0.573259	0.476451	0.515209	0.461093	0.469011	0.497947	0.502993
			KW	0.680563	0.709584	0.654872	0.718567	0.66647	0.686627	0.653678	0.693538	0.719172	0.671097	0.67211	0.689409	0.673017	0.686354	0.624861	0.678567	0.706937	0.598806	0.700872	0.669721	0.704608	0.683345	0.662901	0.674423	0.598806	0.598806	0.67279	0.598806	0.703383	0.598806	0.712987	0.72129	0.702884	0.70736	0.674695	0.704381	0.711232	0.71462	0.688093	0.708495	0.678884	0.718008	0.663914	0.671928	0.70057	0.607129
			OM	0.573116	0.601955	0.547586	0.610882	0.559111	0.579142	0.546399	0.586009	0.611483	0.563709	0.564716	0.582072	0.565783	0.579036	0.518814	0.571297	0.59949	0.502313	0.593463	0.562507	0.597115	0.576046	0.55573	0.56718	0.502313	0.502313	0.565557	0.502313	0.595793	0.502313	0.605336	0.613587	0.595297	0.599745	0.567285	0.596785	0.603593	0.606959	0.580599	0.601038	0.571448	0.610326	0.556571	0.564535	0.592997	0.519745
			QA	0.548302	0.577082	0.522824	0.585991	0.534325	0.554315	0.521639	0.561169	0.586591	0.538914	0.539919	0.557075	0.540818	0.554045	0.49306	0.546322	0.574457	0.470497	0.568443	0.537549	0.572147	0.551061	0.530786	0.542213	0.470497	0.470497	0.540593	0.470497	0.570932	0.470497	0.580456	0.588691	0.570437	0.574877	0.542483	0.571922	0.578716	0.582076	0.55577	0.576002	0.546637	0.585436	0.531791	0.539739	0.568143	0.482715
			SA	0.677097	0.737077	0.65135	0.731938	0.662973	0.683175	0.686282	0.726374	0.730498	0.703879	0.668626	0.737016	0.720841	0.734212	0.679628	0.726208	0.754846	0.63665	0.748766	0.717537	0.752177	0.731195	0.7107	0.722251	0.63665	0.63665	0.720614	0.63665	0.699968	0.63665	0.709594	0.717916	0.699468	0.703955	0.671217	0.700969	0.707835	0.711231	0.684645	0.756407	0.675415	0.714626	0.660412	0.668444	0.697149	0.685266
			AE	0.596421	0.625291	0.570863	0.634228	0.582401	0.602453	0.569675	0.609328	0.63483	0.587004	0.588012	0.605221	0.588914	0.602182	0.541022	0.594435	0.622658	0.51856	0.616625	0.585635	0.620341	0.599189	0.578851	0.590313	0.51856	0.51856	0.588688	0.51856	0.619122	0.51856	0.628676	0.636936	0.618626	0.623079	0.590584	0.620115	0.626931	0.630301	0.603912	0.624207	0.594751	0.633671	0.579858	0.587831	0.616324	0.532119
		North America	CA	0.451274	0.486517	0.476332	0.481499	0.468388	0.447019	0.527037	0.497285	0.480081	0.51812	0.463221	0.577034	0.561094	0.57427	0.52048	0.566382	0.567846	0.406553	0.573448	0.557838	0.574659	0.571297	0.551101	0.562484	0.406553	0.406553	0.56087	0.406553	0.447586	0.406553	0.451991	0.460189	0.447168	0.450199	0.472614	0.448572	0.449662	0.453604	0.444525	0.568429	0.455456	0.456949	0.47227	0.479752	0.442554	0.526036
			MX	0.685413	0.70904	0.710795	0.704109	0.702748	0.680846	0.751234	0.715984	0.702672	0.733442	0.697514	0.77222	0.780437	0.77163	0.755516	0.780573	0.747724	0.602021	0.753397	0.78531	0.754623	0.773204	0.786535	0.790213	0.602021	0.602021	0.779847	0.602021	0.685171	0.602021	0.69045	0.698754	0.684748	0.688635	0.707028	0.68617	0.688091	0.692084	0.678804	0.748314	0.689649	0.695472	0.706681	0.714259	0.680332	0.761144
			TT	0.604214	0.617532	0.629496	0.613178	0.62148	0.59885	0.658669	0.623544	0.611747	0.640948	0.616267	0.707455	0.715022	0.706867	0.674041	0.715776	0.683053	0.542935	0.688705	0.711736	0.689926	0.708435	0.704938	0.716424	0.542935	0.542935	0.714796	0.542935	0.609321	0.542935	0.617442	0.625714	0.608824	0.613284	0.625744	0.610316	0.615092	0.619069	0.598986	0.683641	0.608432	0.622444	0.625398	0.632946	0.605524	0.679647
			US	0.738067	0.762125	0.763536	0.757161	0.755461	0.733468	0.805619	0.769805	0.755719	0.787764	0.750209	0.827362	0.835607	0.82677	0.808412	0.835744	0.802779	0.655727	0.808473	0.840497	0.809703	0.828349	0.83954	0.845417	0.655727	0.655727	0.835015	0.655727	0.737809	0.655727	0.743106	0.751439	0.737384	0.741284	0.759757	0.738811	0.740738	0.744745	0.731419	0.803372	0.742317	0.748145	0.759407	0.767012	0.732952	0.81406
		South America	AR	0.71738	0.697402	0.742797	0.700431	0.734738	0.71173	0.716153	0.689406	0.699856	0.698341	0.729497	0.76637	0.777188	0.792264	0.757568	0.776157	0.784581	0.623116	0.790582	0.773415	0.75069	0.782324	0.771097	0.782294	0.623116	0.623116	0.779551	0.623116	0.72877	0.623116	0.738389	0.746706	0.72827	0.732754	0.739025	0.72977	0.736632	0.740025	0.714441	0.793521	0.721621	0.743418	0.738677	0.746266	0.725832	0.764855
			BO	0.483847	0.483847	0.483847	0.483847	0.483847	0.483847	0.483847	0.483847	0.483847	0.483847	0.483847	0.483847	0.483847	0.483847	0.483847	0.483847	0.483847	0.483847	0.483847	0.483847	0.483847	0.483847	0.483847	0.483847	0.483847	0.483847	0.483847	0.483847	0.483847	0.483847	0.483847	0.483847	0.483847	0.483847	0.483847	0.483847	0.483847	0.483847	0.483847	0.483847	0.483847	0.483847	0.483847	0.483847	0.483847	0.483847
			BR	0.597513	0.581712	0.622766	0.582856	0.61476	0.591885	0.609206	0.578582	0.581968	0.591508	0.609552	0.671837	0.66985	0.684829	0.650356	0.668826	0.704145	0.524587	0.699402	0.666101	0.669729	0.680147	0.663798	0.674923	0.524587	0.524587	0.672198	0.524587	0.60883	0.524587	0.618387	0.626649	0.608333	0.612788	0.619019	0.609823	0.616641	0.620012	0.594623	0.70693	0.601727	0.623383	0.618673	0.626213	0.60585	0.657596
			CL	0.898531	0.886656	1.00304	0.891262	0.91607	0.895011	0.972342	0.877781	0.890466	0.969556	0.910774	0.919544	0.941387	0.946056	0.973751	0.933534	0.930366	0.781854	0.940652	0.945092	0.901837	0.935769	0.941846	0.952639	0.781854	0.781854	0.949868	0.781854	0.901209	0.781854	0.907744	0.916146	0.900781	0.905234	0.920401	0.902219	0.905356	0.909397	0.892563	0.934667	0.902816	0.912825	0.920049	0.927718	0.896526	0.989966
			PE	0.608842	0.625084	0.738279	0.620617	0.626076	0.605384	0.708113	0.622302	0.619189	0.705375	0.620873	0.65381	0.672551	0.669979	0.709497	0.667994	0.646229	0.51153	0.65217	0.676883	0.636393	0.665406	0.678147	0.685999	0.51153	0.51153	0.678718	0.51153	0.611474	0.51153	0.617895	0.626151	0.611053	0.615429	0.630332	0.612466	0.615549	0.619519	0.602978	0.648305	0.613053	0.622888	0.629986	0.637521	0.606872	0.72543
			VE	0.833204	0.846719	0.858859	0.842301	0.850725	0.827762	0.888463	0.85282	0.840848	0.87048	0.845435	0.937974	0.945654	0.937377	0.904063	0.946419	0.913209	0.77074	0.918945	0.942319	0.920184	0.938968	0.935419	0.947076	0.77074	0.77074	0.945424	0.77074	0.838387	0.77074	0.846628	0.855021	0.837883	0.842408	0.855052	0.839396	0.844242	0.848279	0.8279	0.913806	0.837485	0.851703	0.8547	0.862361	0.834534	0.909752
	Blue_Renew_NH3ship
		GHG [kgCO2e/kgNH3]	Destination	Africa											Asia-Pacific																Europe																		Middle East
		Origin		DZ	AO	EG	GQ	LY	MA	MZ	NA	NG	ZA	TN	AU	BN	CN	IN	ID	JP	KZ	KR	MY	PG	PH	SG	TH	TM	UZ	VN	AZ	BE	CZ	DK	FI	FR	DE	IT	NL	NO	PL	PT	RU	ES	SE	TR	UA	GB	IR
		Africa	DZ	0.806776	0.846239	0.825584	0.843101	0.820898	0.814445	0.856735	0.852999	0.842226	0.8665	0.817893	0.889835	0.879009	0.887939	0.852575	0.882571	0.902081	0.807147	0.897867	0.876829	0.900227	0.885908	0.872354	0.879942	0.807147	0.807147	0.878858	0.807147	0.824092	0.807147	0.829725	0.834657	0.823802	0.826416	0.823406	0.824674	0.82869	0.830691	0.815281	0.903169	0.813929	0.832701	0.823186	0.82756	0.822457	0.856097
			AO	0.404446	0.385586	0.412036	0.39015	0.409599	0.40266	0.403353	0.391968	0.390336	0.398225	0.40803	0.422604	0.421965	0.42683	0.415798	0.421637	0.433678	0.385763	0.431671	0.420765	0.427751	0.425297	0.420031	0.4236	0.385763	0.385763	0.422721	0.385763	0.407939	0.385763	0.410828	0.413358	0.40779	0.409131	0.410892	0.408238	0.410297	0.411323	0.403649	0.434214	0.405693	0.412354	0.410787	0.413094	0.407101	0.418068
			EG	0.720442	0.752325	0.70403	0.749483	0.713322	0.72355	0.73377	0.75557	0.748691	0.743182	0.716155	0.761575	0.752485	0.759983	0.730273	0.755476	0.771851	0.704354	0.768316	0.750654	0.770295	0.758278	0.746895	0.753268	0.704354	0.704354	0.752358	0.704354	0.732277	0.704354	0.737374	0.741838	0.732014	0.734379	0.717461	0.732803	0.736437	0.738248	0.724305	0.772764	0.719587	0.740067	0.712046	0.716063	0.730797	0.733234
			GQ	0.777024	0.752347	0.791551	0.743546	0.786886	0.773513	0.782898	0.760684	0.748274	0.772882	0.783882	0.820521	0.819272	0.828782	0.807217	0.81863	0.842172	0.743888	0.838247	0.816926	0.830584	0.825786	0.815492	0.822468	0.743888	0.743888	0.820749	0.743888	0.783675	0.743888	0.789203	0.794045	0.78339	0.785955	0.789361	0.784246	0.788187	0.790151	0.775472	0.843222	0.779411	0.792124	0.789159	0.793575	0.78207	0.811653
			LY	0.969311	1.01196	0.96521	1.00816	0.952636	0.973479	1.00126	1.02015	1.00711	1.01421	0.962791	1.03953	1.02701	1.03734	0.996444	1.03113	1.05368	0.953075	1.04881	1.02449	1.05154	1.03499	1.01932	1.02809	0.953075	0.953075	1.02684	0.953075	0.985153	0.953075	0.99197	0.997941	0.984801	0.987965	0.967745	0.985857	0.990718	0.993139	0.97449	1.05494	0.968177	0.995572	0.964157	0.969229	0.983173	1.00052
			MA	1.00125	1.03574	1.01932	1.03179	1.01352	0.991821	1.05795	1.04397	1.03081	1.06031	1.00978	1.09902	1.08558	1.09666	1.05279	1.09	1.11421	0.992277	1.10898	1.08288	1.11191	1.09415	1.07733	1.08674	0.992277	0.992277	1.0854	0.992277	1.01084	0.992277	1.01773	1.02377	1.01048	1.01368	1.0166	1.01155	1.01647	1.01891	1.0001	1.11556	1.00422	1.02137	1.01635	1.02184	1.00884	1.05716
			MZ	0.619886	0.610636	0.608398	0.614633	0.613531	0.622661	0.583739	0.603625	0.614904	0.594083	0.616059	0.621281	0.617361	0.623448	0.604403	0.617259	0.633079	0.584008	0.63021	0.615875	0.628478	0.622064	0.612823	0.617998	0.584008	0.584008	0.617259	0.584008	0.63046	0.584008	0.635018	0.639012	0.630225	0.63234	0.617225	0.63093	0.63418	0.635799	0.623336	0.63382	0.619123	0.637427	0.612393	0.615977	0.629137	0.607431
			NA	0.420885	0.404666	0.427219	0.407253	0.426291	0.419007	0.411638	0.398077	0.407419	0.406465	0.424644	0.431049	0.430405	0.435306	0.424189	0.430074	0.442204	0.39826	0.440183	0.429196	0.436235	0.433763	0.428456	0.432053	0.39826	0.39826	0.431166	0.39826	0.424544	0.39826	0.427575	0.43023	0.424388	0.425794	0.427647	0.424857	0.427018	0.428095	0.420039	0.442745	0.422193	0.429177	0.427536	0.429958	0.423665	0.426477
			NG	0.755914	0.733017	0.770031	0.728701	0.765499	0.752559	0.762756	0.741088	0.724097	0.752993	0.762579	0.799428	0.798211	0.80748	0.786461	0.797585	0.820533	0.72443	0.816707	0.795924	0.809237	0.80456	0.794526	0.801326	0.72443	0.72443	0.79965	0.72443	0.762378	0.72443	0.76775	0.772456	0.7621	0.764593	0.767903	0.762932	0.766763	0.768671	0.754405	0.821556	0.758233	0.770589	0.767707	0.771999	0.760818	0.790784
			ZA	1.46796	1.41159	1.44279	1.42071	1.45512	1.46116	1.39101	1.39558	1.42133	1.36678	1.4612	1.45894	1.45509	1.4714	1.43273	1.45399	1.49435	1.36741	1.48763	1.45107	1.47625	1.46627	1.44764	1.45997	1.36741	1.36741	1.45763	1.36741	1.48078	1.36741	1.49152	1.50093	1.48023	1.48521	1.464	1.48189	1.48955	1.49336	1.46482	1.49615	1.46856	1.4972	1.45239	1.461	1.47766	1.44033
			TN	0.823386	0.85947	0.826183	0.856256	0.820852	0.826905	0.857163	0.866398	0.855359	0.868298	0.812195	0.890068	0.879307	0.888183	0.853027	0.882848	0.902237	0.812568	0.898051	0.877141	0.900395	0.886165	0.872692	0.880235	0.812568	0.812568	0.879158	0.812568	0.836784	0.812568	0.842553	0.847605	0.836486	0.839163	0.824822	0.83738	0.841493	0.843542	0.82776	0.903319	0.822514	0.845601	0.824261	0.828617	0.835109	0.85653
		Asia-Pacific	AU	0.794694	0.789689	0.779408	0.795107	0.786235	0.79839	0.766854	0.780194	0.795474	0.769099	0.789599	0.720516	0.738238	0.743082	0.760501	0.733151	0.747999	0.720847	0.747196	0.738887	0.733229	0.737613	0.739046	0.743974	0.720847	0.720847	0.742305	0.720847	0.808782	0.720847	0.814861	0.820191	0.808469	0.811289	0.791151	0.80941	0.813744	0.815904	0.799289	0.751223	0.793677	0.818076	0.784721	0.78949	0.807019	0.769563
			BN	0.740599	0.743873	0.726524	0.748969	0.732811	0.744001	0.718892	0.734942	0.749314	0.723658	0.735908	0.69646	0.67974	0.692199	0.708973	0.689993	0.700773	0.680053	0.697866	0.685528	0.70241	0.688435	0.6881	0.69044	0.680053	0.680053	0.68775	0.680053	0.753566	0.680053	0.759159	0.764062	0.753277	0.755872	0.737337	0.754143	0.758131	0.760118	0.744829	0.701666	0.739663	0.762116	0.731417	0.735808	0.751943	0.71732
			CN	0.891585	0.896739	0.874471	0.902953	0.882115	0.895722	0.865195	0.88585	0.903374	0.872096	0.88588	0.835461	0.824936	0.810089	0.853141	0.829302	0.828796	0.810461	0.824769	0.826637	0.842041	0.820572	0.827742	0.828051	0.810461	0.810461	0.822902	0.810461	0.907356	0.810461	0.914161	0.920127	0.907005	0.910162	0.887618	0.908059	0.91291	0.915328	0.896729	0.829178	0.890446	0.917759	0.880419	0.885759	0.905382	0.863284
			IN	1.0597	1.08135	1.04015	1.08864	1.04889	1.06442	1.03827	1.06855	1.08914	1.05115	1.05319	1.05842	1.0459	1.05607	1.00277	1.05011	1.07215	1.00324	1.06736	1.04342	1.07026	1.05376	1.03832	1.04696	1.00324	1.00324	1.04573	1.00324	1.07769	1.00324	1.08544	1.09223	1.07729	1.08088	1.05517	1.07849	1.08401	1.08677	1.06557	1.07339	1.0584	1.08954	1.04695	1.05305	1.07544	1.02225
			ID	0.956281	0.955887	0.938034	0.962429	0.946184	0.960691	0.924352	0.944419	0.962873	0.92993	0.950199	0.889485	0.88734	0.894889	0.915416	0.874155	0.903807	0.874558	0.902537	0.888454	0.898325	0.888095	0.888482	0.894524	0.874558	0.874558	0.892555	0.874558	0.973092	0.874558	0.980345	0.986703	0.972718	0.976083	0.952051	0.973841	0.979012	0.981589	0.961764	0.907401	0.955067	0.98418	0.944376	0.95007	0.970988	0.926238
			JP	0.934416	0.939926	0.9162	0.946545	0.924335	0.938821	0.906331	0.928332	0.946994	0.913694	0.928343	0.867572	0.861553	0.854994	0.893512	0.864042	0.835695	0.836079	0.845846	0.864332	0.871463	0.855993	0.866574	0.866452	0.836079	0.836079	0.861925	0.836079	0.951213	0.836079	0.958463	0.964821	0.950839	0.954202	0.930192	0.951961	0.95713	0.959707	0.939893	0.848363	0.933204	0.962298	0.92253	0.928213	0.94911	0.904299
			KZ	0.797773	0.797773	0.797773	0.797773	0.797773	0.797773	0.797773	0.797773	0.797773	0.797773	0.797773	0.797773	0.797773	0.797773	0.797773	0.797773	0.797773	0.797406	0.797773	0.797773	0.797773	0.797773	0.797773	0.797773	0.797773	0.797773	0.797773	0.797773	0.797773	0.797773	0.797773	0.797773	0.797773	0.797773	0.797773	0.797773	0.797773	0.797773	0.797773	0.797773	0.797773	0.797773	0.797773	0.797773	0.797773	0.797773
			KR	0.900682	0.906032	0.883204	0.912382	0.891009	0.904908	0.873734	0.894907	0.912813	0.88086	0.894855	0.839273	0.830886	0.823971	0.861431	0.835581	0.819136	0.809677	0.809305	0.833789	0.844968	0.825863	0.835455	0.835266	0.809677	0.809677	0.830895	0.809677	0.916795	0.809677	0.92375	0.929848	0.916437	0.919663	0.89663	0.917513	0.922472	0.924943	0.905937	0.81775	0.899519	0.927428	0.889278	0.894731	0.914778	0.871783
			MY	0.679299	0.682053	0.66642	0.686711	0.672173	0.682411	0.659436	0.673887	0.687027	0.663569	0.675007	0.640964	0.630349	0.637795	0.650359	0.635251	0.646445	0.625315	0.643936	0.625027	0.647567	0.635082	0.631182	0.634225	0.625315	0.625315	0.632352	0.625315	0.691162	0.625315	0.696279	0.700764	0.690898	0.693272	0.676314	0.69169	0.695338	0.697157	0.683168	0.647412	0.678442	0.698984	0.670897	0.674915	0.689677	0.657998
			PG	0.82602	0.821225	0.80995	0.826928	0.817127	0.829907	0.797009	0.811232	0.827315	0.799558	0.820663	0.753335	0.764961	0.769472	0.790091	0.760741	0.771957	0.740614	0.772894	0.766969	0.740273	0.763764	0.767068	0.77221	0.740614	0.740614	0.769438	0.740614	0.840838	0.740614	0.847233	0.852842	0.840508	0.843475	0.822295	0.841498	0.846058	0.848331	0.830852	0.777088	0.824951	0.850616	0.815535	0.820549	0.838983	0.799649
			PH	0.814822	0.818462	0.799217	0.824113	0.806187	0.818594	0.790758	0.808559	0.824496	0.796049	0.80962	0.759647	0.751531	0.751642	0.779765	0.753872	0.760063	0.742381	0.757221	0.753976	0.765586	0.742039	0.756551	0.756736	0.742381	0.742381	0.752871	0.742381	0.829202	0.742381	0.835406	0.840845	0.828882	0.83176	0.811204	0.829842	0.834265	0.83647	0.819512	0.761278	0.813784	0.838687	0.80464	0.80951	0.827402	0.789015
			SG	0.781797	0.787618	0.76705	0.792988	0.773638	0.785361	0.759052	0.778204	0.793352	0.7658	0.776883	0.741622	0.731919	0.738783	0.748654	0.734877	0.749743	0.72336	0.74639	0.730147	0.749198	0.737167	0.723027	0.73257	0.72336	0.72336	0.731725	0.72336	0.79538	0.72336	0.801238	0.806372	0.795078	0.797796	0.77838	0.795985	0.800161	0.802242	0.786228	0.750525	0.780817	0.804335	0.772176	0.776778	0.79368	0.757404
			TH	0.721164	0.726388	0.707444	0.731383	0.713573	0.724481	0.700006	0.717634	0.731722	0.706282	0.716592	0.682728	0.671609	0.675862	0.690337	0.676608	0.685536	0.661505	0.682411	0.670931	0.689727	0.674297	0.669928	0.661201	0.661505	0.661505	0.668772	0.661505	0.733804	0.661505	0.739257	0.744037	0.733523	0.736053	0.717985	0.734367	0.738255	0.740192	0.725287	0.686094	0.720252	0.74214	0.712213	0.716494	0.732223	0.698473
			TM	1.59081	1.59081	1.59081	1.59081	1.59081	1.59081	1.59081	1.59081	1.59081	1.59081	1.59081	1.59081	1.59081	1.59081	1.59081	1.59081	1.59081	1.59081	1.59081	1.59081	1.59081	1.59081	1.59081	1.59081	1.59007	1.59081	1.59081	1.59081	1.59081	1.59081	1.59081	1.59081	1.59081	1.59081	1.59081	1.59081	1.59081	1.59081	1.59081	1.59081	1.59081	1.59081	1.59081	1.59081	1.59081	1.59081
			UZ	0.937739	0.937739	0.937739	0.937739	0.937739	0.937739	0.937739	0.937739	0.937739	0.937739	0.937739	0.937739	0.937739	0.937739	0.937739	0.937739	0.937739	0.937739	0.937739	0.937739	0.937739	0.937739	0.937739	0.937739	0.937739	0.937308	0.937739	0.937739	0.937739	0.937739	0.937739	0.937739	0.937739	0.937739	0.937739	0.937739	0.937739	0.937739	0.937739	0.937739	0.937739	0.937739	0.937739	0.937739	0.937739	0.937739
			VN	0.644907	0.649028	0.632652	0.653482	0.638126	0.647869	0.626008	0.641222	0.653784	0.63136	0.640823	0.609916	0.598988	0.601376	0.617372	0.604474	0.610594	0.592285	0.607806	0.59895	0.615337	0.600655	0.599134	0.598792	0.592285	0.592285	0.592013	0.592285	0.656196	0.592285	0.661065	0.665334	0.655945	0.658204	0.642066	0.656699	0.66017	0.661901	0.648589	0.611089	0.644092	0.66364	0.636912	0.640736	0.654783	0.624639
		Europe	AZ	0.654262	0.654262	0.654262	0.654262	0.654262	0.654262	0.654262	0.654262	0.654262	0.654262	0.654262	0.654262	0.654262	0.654262	0.654262	0.654262	0.654262	0.654262	0.654262	0.654262	0.654262	0.654262	0.654262	0.654262	0.654262	0.654262	0.654262	0.653961	0.654262	0.654262	0.654262	0.654262	0.654262	0.654262	0.654262	0.654262	0.654262	0.654262	0.654262	0.654262	0.654262	0.654262	0.654262	0.654262	0.654262	0.654262
			BE	0.34065	0.352826	0.346873	0.351491	0.344875	0.339887	0.360184	0.355665	0.351123	0.361307	0.343589	0.374346	0.369712	0.373535	0.358405	0.371237	0.379591	0.333646	0.377786	0.368779	0.378797	0.372665	0.366865	0.370111	0.333646	0.333646	0.369648	0.333646	0.333492	0.333646	0.337543	0.339518	0.335436	0.336158	0.345935	0.335475	0.337122	0.33793	0.338897	0.380057	0.341673	0.338735	0.345849	0.347739	0.336805	0.359911
			CZ	0.9568	0.9568	0.9568	0.9568	0.9568	0.9568	0.9568	0.9568	0.9568	0.9568	0.9568	0.9568	0.9568	0.9568	0.9568	0.9568	0.9568	0.9568	0.9568	0.9568	0.9568	0.9568	0.9568	0.9568	0.9568	0.9568	0.9568	0.9568	0.9568	0.95636	0.9568	0.9568	0.9568	0.9568	0.9568	0.9568	0.9568	0.9568	0.9568	0.9568	0.9568	0.9568	0.9568	0.9568	0.9568	0.9568
			DK	0.333719	0.345731	0.339857	0.344414	0.337887	0.332966	0.352994	0.348534	0.344051	0.354102	0.336618	0.366978	0.362401	0.366176	0.351238	0.363907	0.372158	0.324638	0.370375	0.36148	0.371374	0.365317	0.359589	0.362795	0.324638	0.324638	0.362337	0.324638	0.328431	0.324638	0.324489	0.328619	0.328573	0.327802	0.338932	0.328281	0.327003	0.32699	0.33199	0.372619	0.334728	0.327868	0.338847	0.340713	0.329926	0.352725
			FI	0.395241	0.409555	0.402554	0.407985	0.400206	0.394344	0.418212	0.412895	0.407552	0.419534	0.398694	0.434888	0.429429	0.433932	0.416119	0.431225	0.441068	0.382214	0.438941	0.428331	0.440132	0.432908	0.426076	0.4299	0.382214	0.382214	0.429354	0.382214	0.38894	0.382214	0.3869	0.382038	0.38911	0.388192	0.401452	0.388762	0.387187	0.386188	0.39318	0.441617	0.396442	0.384986	0.40135	0.403574	0.390722	0.417891
			FR	0.445294	0.461204	0.453425	0.45946	0.450815	0.444297	0.470819	0.464915	0.458979	0.472287	0.449134	0.489325	0.483269	0.488264	0.468495	0.485262	0.496177	0.436292	0.493819	0.48205	0.495139	0.487128	0.479548	0.483791	0.436292	0.436292	0.483185	0.436292	0.438633	0.436292	0.44158	0.444165	0.436091	0.439846	0.4522	0.438934	0.441038	0.442086	0.443003	0.496786	0.446631	0.44314	0.452087	0.454558	0.440283	0.470463
			DE	0.630564	0.653168	0.642115	0.650689	0.638407	0.629148	0.66683	0.65844	0.650006	0.668916	0.636019	0.693131	0.684524	0.691624	0.663528	0.687356	0.702872	0.615862	0.69952	0.682792	0.701397	0.690009	0.679236	0.685266	0.615862	0.615862	0.684405	0.615862	0.620499	0.615862	0.621864	0.625495	0.620879	0.615579	0.640375	0.620284	0.621096	0.622575	0.627309	0.703738	0.632463	0.624055	0.640214	0.643725	0.623426	0.666324
			IT	0.863027	0.901094	0.861729	0.8977	0.859008	0.866721	0.894104	0.908409	0.896754	0.905741	0.858743	0.928494	0.917247	0.926524	0.889781	0.920948	0.941214	0.845986	0.936838	0.914983	0.939288	0.924415	0.910333	0.918217	0.845986	0.845986	0.917091	0.845986	0.877147	0.845986	0.883235	0.888568	0.876832	0.879658	0.845597	0.877775	0.882117	0.884279	0.867624	0.942345	0.861775	0.886453	0.859017	0.863571	0.875379	0.893442
			NL	0.492487	0.510102	0.501489	0.508171	0.498599	0.491383	0.520748	0.51421	0.507638	0.522373	0.496738	0.54124	0.534534	0.540065	0.518175	0.536741	0.548828	0.48202	0.546217	0.533185	0.547679	0.538807	0.530414	0.535112	0.48202	0.48202	0.534441	0.48202	0.484663	0.48202	0.487429	0.490278	0.484938	0.48548	0.500132	0.481798	0.486795	0.487987	0.48995	0.549503	0.493966	0.489148	0.500007	0.502743	0.486923	0.520354
			NO	0.112478	0.116521	0.114544	0.116078	0.113881	0.112224	0.118966	0.117464	0.115956	0.119339	0.113454	0.123672	0.122132	0.123402	0.118375	0.122639	0.125415	0.109554	0.124815	0.121822	0.125151	0.123113	0.121185	0.122264	0.109554	0.109554	0.12211	0.109554	0.110695	0.109554	0.110352	0.110979	0.110746	0.110485	0.114233	0.110639	0.109503	0.110463	0.111896	0.12557	0.112817	0.110726	0.114204	0.114832	0.111201	0.118875
			PL	0.980931	1.01628	0.998995	1.01241	0.993196	0.978716	1.03766	1.02453	1.01134	1.04092	0.989461	1.07882	1.06534	1.07646	1.03249	1.06978	1.09406	0.953129	1.08882	1.06263	1.09176	1.07393	1.05707	1.06651	0.953129	0.953129	1.06516	0.953129	0.965368	0.953129	0.960033	0.963039	0.965788	0.963518	0.996272	0.964928	0.961036	0.952691	0.975841	1.09542	0.983899	0.960844	0.996021	1.00151	0.96977	1.03686
			PT	0.817891	0.847274	0.832668	0.844111	0.827926	0.816113	0.864261	0.854011	0.843237	0.867412	0.82487	0.897845	0.886859	0.895921	0.860042	0.890474	0.910274	0.809732	0.905997	0.884647	0.908392	0.89386	0.880107	0.887806	0.809732	0.809732	0.886707	0.809732	0.822475	0.809732	0.828068	0.832964	0.822187	0.824782	0.830442	0.823053	0.82704	0.829026	0.809359	0.911379	0.82032	0.831022	0.830237	0.834727	0.820852	0.863615
			RU	0.665302	0.669246	0.652317	0.673964	0.658116	0.668443	0.645282	0.660981	0.674285	0.650546	0.660973	0.619624	0.613466	0.6083	0.636145	0.616898	0.603304	0.594569	0.600497	0.61558	0.623852	0.609705	0.616898	0.61667	0.594569	0.594569	0.613446	0.594569	0.677276	0.594569	0.682445	0.686978	0.67701	0.679407	0.662291	0.67781	0.681495	0.683332	0.669207	0.594296	0.664438	0.685179	0.656829	0.660881	0.675777	0.643834
			ES	0.679453	0.708602	0.688364	0.705967	0.684469	0.681901	0.714305	0.714281	0.705232	0.723631	0.682038	0.741867	0.732852	0.740288	0.710841	0.735819	0.752063	0.673791	0.748555	0.731037	0.750519	0.738597	0.727311	0.733629	0.673791	0.673791	0.732727	0.673791	0.690002	0.673791	0.694733	0.698875	0.689758	0.691954	0.686367	0.690491	0.693864	0.695544	0.682603	0.75297	0.673482	0.697232	0.686367	0.69001	0.688629	0.713774
			SE	0.185324	0.192019	0.188745	0.191285	0.187647	0.184904	0.196068	0.193582	0.191083	0.196686	0.186939	0.203866	0.201314	0.203419	0.195089	0.202153	0.206755	0.179637	0.205761	0.2008	0.206318	0.20294	0.199746	0.201534	0.179637	0.179637	0.201278	0.179637	0.182377	0.179637	0.181424	0.18094	0.182456	0.182026	0.188229	0.182293	0.181558	0.181091	0.18436	0.207012	0.185886	0.179554	0.188182	0.189222	0.18321	0.195918
			TR	0.809868	0.845599	0.802761	0.842415	0.803323	0.813351	0.832685	0.852462	0.841527	0.843436	0.805515	0.864452	0.854065	0.862633	0.828691	0.857483	0.876197	0.794089	0.872157	0.851973	0.874419	0.860685	0.847679	0.85496	0.794089	0.794089	0.853921	0.794089	0.823132	0.794089	0.828844	0.833848	0.822837	0.825488	0.80632	0.823722	0.827795	0.829824	0.814198	0.877241	0.808909	0.831863	0.793724	0.802906	0.821474	0.832073
			UA	0.520996	0.544147	0.516593	0.542086	0.516758	0.523283	0.535962	0.548588	0.541512	0.542923	0.518182	0.556534	0.549806	0.555355	0.533376	0.55202	0.564142	0.508145	0.561524	0.548452	0.56299	0.554093	0.54567	0.550386	0.508145	0.508145	0.549713	0.508145	0.52961	0.508145	0.533306	0.536543	0.529419	0.531134	0.518708	0.529992	0.532627	0.533939	0.523831	0.564818	0.520376	0.535259	0.513787	0.507911	0.528537	0.535566
			GB	0.433849	0.449323	0.441757	0.447627	0.439219	0.432879	0.458674	0.452932	0.447159	0.460102	0.437584	0.47667	0.470782	0.475639	0.456414	0.472719	0.483333	0.425773	0.481041	0.469597	0.482324	0.474534	0.467164	0.471289	0.425773	0.425773	0.4707	0.425773	0.429804	0.425773	0.432708	0.435251	0.429668	0.431002	0.440566	0.430104	0.432175	0.433206	0.43162	0.483926	0.435149	0.434242	0.440456	0.442859	0.425577	0.458328
		Middle East	IR	0.721551	0.737263	0.708188	0.742266	0.714159	0.724778	0.707579	0.728492	0.742605	0.716569	0.717099	0.726269	0.717574	0.724633	0.69319	0.720494	0.735802	0.680294	0.732475	0.71585	0.734521	0.723028	0.712311	0.718312	0.680294	0.680294	0.717455	0.680294	0.733849	0.680294	0.73915	0.743796	0.733575	0.736035	0.718455	0.734396	0.738176	0.740059	0.725563	0.736661	0.720662	0.741952	0.712835	0.717004	0.73231	0.679981
			IQ	1.03001	1.05243	1.01094	1.05957	1.01946	1.03462	1.01007	1.03992	1.06006	1.0229	1.02366	1.03674	1.02434	1.03441	0.989549	1.0285	1.05035	0.971408	1.0456	1.02188	1.04852	1.03212	1.01683	1.02539	0.971408	0.971408	1.02417	0.971408	1.04756	0.971408	1.05513	1.06176	1.04717	1.05068	1.02559	1.04834	1.05374	1.05642	1.03574	1.05157	1.02874	1.05913	1.01757	1.02352	1.04537	0.97692
			IL	0.455643	0.475838	0.447648	0.474039	0.451188	0.45762	0.464247	0.478059	0.473537	0.47021	0.452967	0.481863	0.476104	0.480855	0.462032	0.478	0.488375	0.445038	0.486135	0.474944	0.487389	0.479775	0.472563	0.476601	0.445038	0.445038	0.476024	0.445038	0.463145	0.445038	0.466372	0.469198	0.462978	0.464476	0.453687	0.463478	0.465779	0.466925	0.458098	0.488953	0.455101	0.468077	0.450156	0.452692	0.462208	0.463908
			KW	0.634825	0.648642	0.623074	0.653042	0.628324	0.637663	0.622538	0.640929	0.65334	0.630444	0.63091	0.638974	0.631328	0.637535	0.609884	0.633896	0.647357	0.598806	0.644432	0.629812	0.64623	0.636124	0.626699	0.631977	0.598806	0.598806	0.631223	0.598806	0.64564	0.598806	0.650301	0.654387	0.645399	0.647562	0.632102	0.646121	0.649445	0.651101	0.638354	0.648113	0.634043	0.652766	0.62716	0.630826	0.644287	0.602349
			OM	0.528456	0.539869	0.518748	0.543502	0.523086	0.530801	0.518305	0.533499	0.543748	0.524837	0.525222	0.531949	0.525631	0.53076	0.508224	0.527753	0.538874	0.502313	0.536458	0.524378	0.537919	0.529594	0.521806	0.526167	0.502313	0.502313	0.525544	0.502313	0.537389	0.502313	0.541239	0.544612	0.537191	0.538977	0.526207	0.537787	0.540532	0.541899	0.531371	0.539498	0.527811	0.543274	0.522124	0.525153	0.536272	0.508558
			QA	0.497599	0.508403	0.48841	0.511843	0.492516	0.499819	0.487991	0.502372	0.512076	0.494173	0.494538	0.500844	0.494865	0.499718	0.478095	0.496873	0.507398	0.470497	0.505111	0.493679	0.506517	0.498615	0.491245	0.495372	0.470497	0.470497	0.494783	0.470497	0.506055	0.470497	0.5097	0.512894	0.505867	0.507559	0.49547	0.506432	0.509031	0.510326	0.500358	0.507989	0.496988	0.511627	0.491605	0.494472	0.504998	0.47461
			SA	0.65503	0.684196	0.643256	0.681596	0.648518	0.657872	0.659334	0.678803	0.680871	0.667741	0.651109	0.684165	0.676049	0.682744	0.65621	0.67872	0.69334	0.63665	0.690184	0.674414	0.691951	0.681222	0.671057	0.676748	0.63665	0.63665	0.675936	0.63665	0.665854	0.63665	0.670517	0.674601	0.665614	0.667777	0.652303	0.666336	0.66966	0.671316	0.658563	0.694155	0.654248	0.672981	0.647352	0.651025	0.664501	0.658856
			AE	0.548352	0.560256	0.538227	0.564046	0.542751	0.550798	0.537766	0.553611	0.564304	0.544578	0.544979	0.551927	0.545339	0.550687	0.526867	0.547552	0.559149	0.51856	0.556629	0.544033	0.558179	0.549472	0.541351	0.545898	0.51856	0.51856	0.545249	0.51856	0.55767	0.51856	0.561686	0.565205	0.557463	0.559326	0.546007	0.558084	0.560948	0.562375	0.551393	0.5598	0.547679	0.563809	0.541748	0.544907	0.556504	0.52357
		North America	CA	0.419777	0.430768	0.427533	0.429168	0.425044	0.418488	0.444136	0.434242	0.428718	0.441124	0.42344	0.461817	0.45603	0.460803	0.441917	0.457933	0.458463	0.406553	0.460502	0.454865	0.460945	0.459717	0.452474	0.456528	0.406553	0.406553	0.455949	0.406553	0.418659	0.406553	0.419995	0.422504	0.418533	0.419451	0.426364	0.418958	0.419288	0.420487	0.417736	0.458675	0.421052	0.421509	0.426257	0.428614	0.417144	0.443796
			MX	0.638992	0.650281	0.651135	0.647892	0.647235	0.636855	0.671461	0.653674	0.647199	0.662364	0.644724	0.682516	0.686944	0.6822	0.673687	0.687018	0.669647	0.602021	0.672584	0.689597	0.673222	0.683043	0.690268	0.692287	0.602021	0.602021	0.686624	0.602021	0.638878	0.602021	0.641366	0.645318	0.63868	0.640508	0.649304	0.639347	0.640251	0.642139	0.635904	0.669951	0.640987	0.64375	0.649135	0.652828	0.636615	0.676637
			TT	0.567163	0.572701	0.577767	0.570878	0.574363	0.564963	0.590506	0.575236	0.570282	0.582702	0.57217	0.613107	0.616768	0.612824	0.597445	0.617135	0.60159	0.542935	0.604219	0.615172	0.60479	0.613578	0.611898	0.617451	0.542935	0.542935	0.616657	0.542935	0.569274	0.542935	0.572663	0.576156	0.569068	0.570922	0.576169	0.569687	0.571678	0.573347	0.565019	0.601863	0.568906	0.57477	0.576022	0.579245	0.567703	0.600017
			US	0.695309	0.707764	0.708509	0.705158	0.70427	0.692978	0.731448	0.711835	0.704405	0.721537	0.70154	0.743889	0.748719	0.743545	0.733023	0.748799	0.729853	0.655727	0.733057	0.751612	0.733753	0.744464	0.751044	0.754546	0.655727	0.655727	0.74837	0.655727	0.695178	0.655727	0.697881	0.702177	0.694962	0.696949	0.706518	0.695687	0.69667	0.698722	0.691944	0.730185	0.697477	0.700473	0.706335	0.710349	0.692717	0.736229
		South America	AR	0.666643	0.656937	0.679414	0.65839	0.675313	0.66387	0.666039	0.65313	0.658114	0.657387	0.672672	0.691702	0.69749	0.70572	0.687062	0.696935	0.701503	0.623116	0.704793	0.695461	0.68348	0.700273	0.69422	0.700256	0.623116	0.623116	0.698768	0.623116	0.672307	0.623116	0.677165	0.681422	0.672056	0.67431	0.677488	0.672809	0.676272	0.677998	0.665198	0.706416	0.668741	0.679733	0.677311	0.681195	0.670837	0.690899
			BO	0.483847	0.483847	0.483847	0.483847	0.483847	0.483847	0.483847	0.483847	0.483847	0.483847	0.483847	0.483847	0.483847	0.483847	0.483847	0.483847	0.483847	0.483847	0.483847	0.483847	0.483847	0.483847	0.483847	0.483847	0.483847	0.483847	0.483847	0.483847	0.483847	0.483847	0.483847	0.483847	0.483847	0.483847	0.483847	0.483847	0.483847	0.483847	0.483847	0.483847	0.483847	0.483847	0.483847	0.483847	0.483847	0.483847
			BR	0.552706	0.546377	0.56313	0.54683	0.559783	0.550435	0.557485	0.54514	0.546478	0.550284	0.557627	0.58455	0.583651	0.590495	0.574976	0.583189	0.599562	0.524587	0.59731	0.581963	0.583596	0.588339	0.58093	0.585951	0.524587	0.524587	0.584713	0.524587	0.55733	0.524587	0.561294	0.564768	0.557125	0.558965	0.561559	0.557739	0.560566	0.561974	0.551538	0.600892	0.554419	0.56339	0.561414	0.564584	0.556105	0.578168
			CL	0.849797	0.842358	0.921384	0.845228	0.861026	0.847578	0.899139	0.836882	0.844731	0.897173	0.857605	0.863286	0.877767	0.880926	0.900136	0.872506	0.870401	0.781854	0.877272	0.880271	0.851891	0.873997	0.878077	0.885417	0.781854	0.781854	0.883521	0.781854	0.851493	0.781854	0.855659	0.861076	0.851221	0.854054	0.863845	0.852134	0.854132	0.856719	0.846042	0.873261	0.852513	0.858927	0.863616	0.868649	0.848532	0.911776
			PE	0.548793	0.555533	0.607518	0.553663	0.55595	0.547379	0.592739	0.554367	0.553068	0.591433	0.55377	0.567867	0.576212	0.575052	0.593402	0.57416	0.564559	0.51153	0.567148	0.578176	0.560325	0.573002	0.578752	0.582353	0.51153	0.51153	0.579012	0.51153	0.549874	0.51153	0.55253	0.555982	0.549701	0.551507	0.557747	0.550283	0.551557	0.553206	0.5464	0.565461	0.550525	0.554612	0.5576	0.560807	0.547987	0.601134
			VE	0.805274	0.813138	0.820333	0.81055	0.815498	0.80215	0.838422	0.816738	0.809703	0.82734	0.812384	0.870518	0.875717	0.870117	0.848278	0.876238	0.854164	0.77074	0.857897	0.873452	0.858708	0.871188	0.868802	0.876687	0.77074	0.77074	0.875561	0.77074	0.808272	0.77074	0.813084	0.818045	0.807979	0.810613	0.818063	0.808858	0.811685	0.814055	0.802229	0.854551	0.807748	0.816077	0.817854	0.822432	0.806041	0.85193
	Green_Grid_MDOship
		GHG [kgCO2e/kgNH3]	Destination	Africa											Asia-Pacific																Europe																		Middle East
		Origin		DZ	AO	EG	GQ	LY	MA	MZ	NA	NG	ZA	TN	AU	BN	CN	IN	ID	JP	KZ	KR	MY	PG	PH	SG	TH	TM	UZ	VN	AZ	BE	CZ	DK	FI	FR	DE	IT	NL	NO	PL	PT	RU	ES	SE	TR	UA	GB	IR
		Africa	DZ	0	0.0782593	0.0453315	0.076496	0.0389657	0.027388	0.0947685	0.0877611	0.0734154	0.121342	0.0305721	0.156157	0.138471	0.150804	0.0961143	0.145218	0.171867	0.0122737	0.164584	0.133213	0.170924	0.148903	0.124566	0.137491	0.0137833	0.0129374	0.134563	0.0123641	0.0380769	0.013402	0.0488508	0.056631	0.0366932	0.0457469	0.0394105	0.0414034	0.0448309	0.0584276	0.0222571	0.172281	0.0200471	0.0520929	0.0399134	0.0455805	0.0363107	0.0981683
			AO	0.0789031	0	0.105661	0.0254172	0.0993124	0.0748286	0.0698864	0.0267016	0.024579	0.0613831	0.0909038	0.144301	0.141593	0.155733	0.12205	0.14158	0.176824	0.00923723	0.169638	0.135839	0.15985	0.152039	0.131966	0.144521	0.0107468	0.00990099	0.140423	0.00932766	0.0867315	0.0103656	0.0975035	0.105282	0.0853478	0.0944007	0.0997084	0.0900577	0.0934839	0.10708	0.0717314	0.17727	0.0794033	0.100745	0.100243	0.106005	0.0849658	0.125849
			EG	0.045352	0.105042	0	0.103279	0.0324789	0.0541709	0.0674578	0.10913	0.100198	0.0963855	0.0355863	0.128846	0.11116	0.123493	0.0688036	0.117907	0.144555	0.0121783	0.137272	0.105902	0.143612	0.121592	0.0972551	0.11018	0.0136879	0.0128421	0.107252	0.0122687	0.0648598	0.0133067	0.0756336	0.0834138	0.063476	0.0725297	0.0370564	0.0681862	0.0716137	0.0852104	0.0490401	0.14497	0.0395899	0.0788757	0.0265388	0.0327665	0.0630936	0.0708575
			GQ	0.0765007	0.0247684	0.103263	0	0.0969134	0.0722489	0.0824283	0.0392838	0.018643	0.0739215	0.0885038	0.156855	0.154147	0.16829	0.1346	0.154134	0.189384	0.0122516	0.182197	0.148392	0.172407	0.164594	0.144518	0.157075	0.0137612	0.0129153	0.152978	0.012342	0.0842673	0.0133799	0.0950412	0.102821	0.0828836	0.0919373	0.0973102	0.0875937	0.0910213	0.104618	0.0692804	0.189831	0.0770017	0.0982833	0.0978451	0.103608	0.0825011	0.1384
			LY	0.0386027	0.0983156	0.0320948	0.0965517	0	0.0474384	0.0815373	0.107819	0.0934709	0.110467	0.0276026	0.142931	0.125244	0.137578	0.0828824	0.131991	0.158643	0.0139637	0.151359	0.119985	0.1577	0.135676	0.111337	0.124264	0.0154732	0.0146274	0.121335	0.0140541	0.0581292	0.015092	0.0689041	0.0766853	0.0567454	0.0657996	0.0340872	0.0614557	0.064884	0.0784811	0.0423077	0.159058	0.0328565	0.0721467	0.0293836	0.0350355	0.0563627	0.084937
			MA	0.0269637	0.0737654	0.0537294	0.0718252	0.0473785	0	0.103173	0.0832525	0.0688565	0.116692	0.0389683	0.164568	0.14688	0.159215	0.104518	0.153628	0.18028	0.0142431	0.172996	0.141621	0.179336	0.157313	0.132973	0.1459	0.0157527	0.0149068	0.142972	0.0143335	0.0366862	0.0153714	0.0474613	0.0552426	0.0353024	0.0443567	0.0477759	0.0400128	0.0434412	0.0570383	0.0209286	0.180695	0.0274652	0.050704	0.0483108	0.0540749	0.0349196	0.106573
			MZ	0.0956461	0.070125	0.0683219	0.0833042	0.0827767	0.104463	0	0.0510705	0.0823859	0.0383324	0.0858826	0.101595	0.0918729	0.104202	0.0620502	0.0927091	0.125259	0.00811337	0.117978	0.0866158	0.116806	0.102302	0.0779705	0.0908928	0.00962295	0.00877713	0.0879647	0.0082038	0.115148	0.00924173	0.125919	0.133697	0.113764	0.122817	0.087352	0.118474	0.1219	0.135496	0.0993322	0.125673	0.0898844	0.12916	0.0768373	0.0830628	0.113382	0.0655119
			NA	0.0887612	0.027066	0.110103	0.040293	0.109169	0.0846714	0.0511926	0	0.0393426	0.0426912	0.100761	0.125601	0.122892	0.137031	0.103352	0.12288	0.158119	0.00754102	0.150934	0.117139	0.141147	0.133337	0.113266	0.12582	0.00905059	0.00820477	0.121723	0.00763144	0.0965723	0.00866938	0.107343	0.115121	0.0951887	0.104241	0.109564	0.0998984	0.103324	0.11692	0.0815578	0.158565	0.0892609	0.110584	0.110099	0.11586	0.0948069	0.107149
			NG	0.0736923	0.0242061	0.100453	0.0189194	0.0941036	0.0695531	0.0817813	0.0386081	0	0.073276	0.0856944	0.156203	0.153495	0.167637	0.133949	0.153482	0.188729	0.0109701	0.181543	0.14774	0.171753	0.163942	0.143867	0.156423	0.0124796	0.0116338	0.152325	0.0110605	0.0814579	0.0120984	0.092231	0.100011	0.0800742	0.0891276	0.0945	0.0847843	0.0882112	0.101808	0.0664723	0.189176	0.074193	0.0954727	0.095035	0.100798	0.0796919	0.137749
			ZA	0.120432	0.0598107	0.0954493	0.0729949	0.10991	0.116195	0.0365089	0.0407475	0.0720769	0	0.113019	0.114334	0.109943	0.12409	0.0886919	0.10993	0.14519	0.0166057	0.138002	0.104187	0.12989	0.120393	0.0993513	0.11228	0.0181153	0.0172694	0.108774	0.0166961	0.128106	0.017734	0.138883	0.146665	0.126722	0.135777	0.11449	0.131433	0.134862	0.14846	0.113083	0.145637	0.117025	0.142126	0.10397	0.1102	0.126339	0.0924939
			TN	0.0307155	0.0904033	0.0357091	0.0886402	0.0281103	0.0395343	0.0851439	0.0999046	0.0855596	0.114071	0	0.14653	0.128845	0.141177	0.0864899	0.135592	0.162239	0.0116066	0.154956	0.123587	0.161296	0.139276	0.11494	0.127865	0.0131162	0.0122704	0.124937	0.011697	0.0502225	0.012735	0.060996	0.0687759	0.0488388	0.0578923	0.0312619	0.0535489	0.0569761	0.0705727	0.0344034	0.162654	0.0251297	0.0642379	0.0311401	0.0368069	0.0484564	0.0885437
		Asia-Pacific	AU	0.155694	0.143205	0.128359	0.156388	0.142818	0.164514	0.100248	0.124144	0.15547	0.114776	0.145927	0	0.0516784	0.0596237	0.0966108	0.0423897	0.0686418	0.0145051	0.066196	0.051226	0.0408161	0.0499039	0.0501235	0.0607276	0.0160146	0.0151688	0.0561968	0.0145955	0.175205	0.0156334	0.18598	0.193762	0.173821	0.182876	0.147397	0.178532	0.18196	0.195557	0.159383	0.0737345	0.149931	0.189223	0.136878	0.143107	0.173438	0.109784
			BN	0.138107	0.140597	0.110773	0.15378	0.125233	0.146927	0.0906257	0.121537	0.152862	0.110488	0.128341	0.051783	0	0.0401981	0.0787542	0.0382637	0.0578507	0.0140165	0.0508073	0.025601	0.063187	0.0332662	0.0298492	0.0356951	0.0155261	0.0146802	0.0286012	0.0141069	0.157618	0.0151449	0.168393	0.176174	0.156234	0.165289	0.129811	0.160945	0.164373	0.17797	0.141796	0.0585057	0.132345	0.171636	0.119292	0.125521	0.155851	0.0919267
			CN	0.150749	0.155048	0.123417	0.16823	0.137875	0.159568	0.103271	0.135989	0.167312	0.124942	0.140983	0.0600431	0.0405149	0	0.091401	0.0495045	0.0449816	0.0125408	0.0368174	0.0418404	0.0703888	0.0320129	0.0424198	0.0437	0.0140504	0.0132046	0.0331307	0.0126313	0.170257	0.0136692	0.181031	0.188812	0.168873	0.177927	0.142453	0.173584	0.177011	0.190608	0.154437	0.044435	0.144987	0.184273	0.131935	0.138163	0.168491	0.104572
			IN	0.095538	0.120842	0.0682025	0.134025	0.0826623	0.104358	0.0605821	0.10178	0.133107	0.0890324	0.0857708	0.0965061	0.0785451	0.0908804	0	0.0855012	0.111947	0.0150003	0.104662	0.0732865	0.111291	0.0889785	0.0646382	0.0775656	0.0165099	0.015664	0.0746369	0.0150907	0.11505	0.0161286	0.125826	0.133607	0.113666	0.122721	0.0872413	0.118377	0.121805	0.135403	0.0992275	0.112361	0.0897756	0.129069	0.0767218	0.0829509	0.113283	0.0418889
			ID	0.144671	0.1404	0.117335	0.153583	0.131795	0.153491	0.0912748	0.121339	0.152665	0.110289	0.134903	0.0423045	0.0380735	0.0489989	0.0855222	0	0.0630157	0.0149014	0.0600733	0.0381979	0.055856	0.0388463	0.0368231	0.0477158	0.016411	0.0155651	0.043217	0.0149918	0.164183	0.0160297	0.174958	0.18274	0.162799	0.171853	0.136374	0.167509	0.170938	0.184535	0.14836	0.067644	0.138908	0.178201	0.125854	0.132084	0.162416	0.0986956
			JP	0.171937	0.176268	0.144606	0.18945	0.159064	0.180756	0.12446	0.15721	0.188531	0.146164	0.162171	0.0691893	0.0582954	0.0451116	0.112592	0.0636487	0	0.0119339	0.0273355	0.0613027	0.0745209	0.0481438	0.0637081	0.0642194	0.0134435	0.0125976	0.0552682	0.0120243	0.191444	0.0130623	0.202218	0.209998	0.190061	0.199114	0.163641	0.194771	0.198198	0.211795	0.175625	0.0314449	0.166175	0.20546	0.153124	0.159352	0.189678	0.125762
			KZ	0.0121519	0.00845809	0.0120358	0.012125	0.0142077	0.0145476	0.00709094	0.00639469	0.010566	0.0174216	0.0113404	0.0148663	0.0142719	0.0124768	0.0154687	0.0153484	0.0117385	0	0.0108788	0.0125059	0.0136146	0.0137631	0.011083	0.0118025	0.0143461	0.0135003	0.010604	0.0129269	0.00748834	0.0139649	0.00809064	0.00707686	0.00663318	0.0109455	0.0100713	0.00975754	0.00592882	0.0159375	0.00786293	0.0105032	0.00816778	0.00601467	0.0109747	0.00871273	0.00870148	0.0115639
			KR	0.1648	0.169227	0.137471	0.182408	0.151928	0.173619	0.117326	0.150169	0.18149	0.139125	0.155035	0.0668943	0.051404	0.0370994	0.105458	0.0608574	0.0274876	0.0112272	0	0.0548275	0.0755893	0.0418294	0.0563678	0.056751	0.0127367	0.0118909	0.047752	0.0113176	0.184307	0.0123555	0.19508	0.20286	0.182923	0.191976	0.156505	0.187633	0.19106	0.204657	0.168488	0.0236895	0.159038	0.198322	0.145988	0.152215	0.182541	0.118627
			MY	0.133152	0.135145	0.105821	0.148327	0.120279	0.141971	0.0856743	0.116086	0.147409	0.105039	0.123386	0.0516413	0.025914	0.0418353	0.0738046	0.0386999	0.0611682	0.0125647	0.0545418	0	0.0656072	0.0367142	0.0247273	0.0327192	0.0140743	0.0132285	0.0270515	0.0126551	0.152661	0.0136931	0.163435	0.171215	0.151277	0.160331	0.124857	0.155987	0.159415	0.173012	0.136841	0.0621434	0.12739	0.166677	0.114339	0.120567	0.150894	0.0869756
			PG	0.170675	0.158972	0.143342	0.172154	0.157801	0.179495	0.115682	0.139912	0.171236	0.130546	0.160909	0.041037	0.0633023	0.0701897	0.111612	0.0561608	0.0741932	0.0134761	0.0751116	0.065413	0	0.0604707	0.0641823	0.0747377	0.0149857	0.0141399	0.0682528	0.0135665	0.190185	0.0146045	0.20096	0.208741	0.188801	0.197855	0.162379	0.193511	0.19694	0.210537	0.174364	0.0826496	0.164913	0.204202	0.15186	0.158089	0.188418	0.124848
			PH	0.148627	0.151133	0.121294	0.164316	0.135753	0.157447	0.101147	0.132073	0.163397	0.121025	0.138861	0.0500982	0.0333562	0.0317854	0.0892756	0.0391264	0.0477874	0.0135982	0.0413209	0.0364921	0.0604446	0	0.0401954	0.0412834	0.0151078	0.0142619	0.0323795	0.0136886	0.168137	0.0147266	0.178912	0.186693	0.166753	0.175808	0.140331	0.171464	0.174892	0.188489	0.152316	0.048939	0.142865	0.182155	0.129813	0.136041	0.166371	0.102448
			SG	0.12475	0.131516	0.0974204	0.144697	0.111878	0.133569	0.077275	0.112458	0.143779	0.100452	0.114985	0.0507891	0.0304134	0.0426655	0.0654067	0.0375764	0.0638229	0.011395	0.056332	0.0249793	0.0646258	0.0406682	0	0.0292894	0.0129046	0.0120588	0.026345	0.0114854	0.144257	0.0125234	0.15503	0.16281	0.142873	0.151926	0.116455	0.147583	0.15101	0.164607	0.128438	0.0641252	0.118988	0.158272	0.105938	0.112165	0.142491	0.0785765
			TH	0.137551	0.143949	0.110221	0.15713	0.124678	0.14637	0.0900748	0.12489	0.156212	0.113252	0.127786	0.0612651	0.0361313	0.0438188	0.0782059	0.0483402	0.0642082	0.0119865	0.0565889	0.0328435	0.0750543	0.0416292	0.0291621	0	0.0134961	0.0126503	0.0260722	0.0120769	0.157059	0.0131149	0.167833	0.175613	0.155675	0.164729	0.129256	0.160385	0.163813	0.17741	0.141239	0.0641742	0.131789	0.171075	0.118738	0.124966	0.155293	0.0913762
			TM	0.0133928	0.00969903	0.0132768	0.0133659	0.0154486	0.0157885	0.00833189	0.00763563	0.011807	0.0186626	0.0125813	0.0161072	0.0155129	0.0137178	0.0167096	0.0165893	0.0129794	0.0140775	0.0121197	0.0137468	0.0148555	0.015004	0.0123239	0.0130435	0	0.0147412	0.0118449	0.0141679	0.00872928	0.0152058	0.00933159	0.00831781	0.00787413	0.0121865	0.0113123	0.0109985	0.00716977	0.0171784	0.00910387	0.0117441	0.00940873	0.00725561	0.0122156	0.00995368	0.00994243	0.0128049
			UZ	0.0126975	0.00900372	0.0125815	0.0126706	0.0147533	0.0150932	0.00763658	0.00694032	0.0111117	0.0179672	0.011886	0.0154119	0.0148176	0.0130225	0.0160143	0.015894	0.0122841	0.0133821	0.0114244	0.0130515	0.0141602	0.0143087	0.0116286	0.0123481	0.0148917	0	0.0111496	0.0134726	0.00803397	0.0145105	0.00863628	0.0076225	0.00717882	0.0114911	0.0106169	0.0103032	0.00647446	0.0164831	0.00840857	0.0110488	0.00871342	0.0065603	0.0115203	0.00925837	0.00924712	0.0121095
			VN	0.134828	0.140056	0.1075	0.153237	0.121956	0.143647	0.0873545	0.120999	0.152319	0.109954	0.125063	0.0569453	0.0292503	0.0334615	0.0754868	0.0440533	0.0554673	0.0110013	0.0478004	0.0273881	0.0687795	0.0329379	0.0264297	0.0262843	0.0125108	0.011665	0	0.0110917	0.154335	0.0121296	0.165108	0.172887	0.152951	0.162004	0.126533	0.157661	0.161088	0.174684	0.138516	0.0554333	0.129067	0.168349	0.116017	0.122244	0.152569	0.0886561
		Europe	AZ	0.0122262	0.00853242	0.0121102	0.0121993	0.014282	0.0146219	0.00716527	0.00646902	0.0106404	0.0174959	0.0114147	0.0149406	0.0143463	0.0125512	0.015543	0.0154227	0.0118128	0.0129108	0.0109531	0.0125802	0.0136889	0.0138374	0.0111573	0.0118768	0.0144204	0.0135746	0.0106783	0	0.00756267	0.0140392	0.00816498	0.00715119	0.00670752	0.0110198	0.0101456	0.00983187	0.00600316	0.0160118	0.00793726	0.0105775	0.00824211	0.006089	0.011049	0.00878706	0.00877581	0.0116382
			BE	0.0388989	0.0868999	0.0656552	0.0850738	0.0593073	0.0379315	0.11508	0.096383	0.0819935	0.129814	0.050899	0.176455	0.158774	0.171103	0.116427	0.165519	0.192161	0.00844005	0.184879	0.153516	0.191218	0.169203	0.144871	0.157794	0.00994963	0.0091038	0.154865	0.00853047	0	0.00956841	0.0210492	0.0288273	0.0100951	0.0176744	0.059703	0.0133956	0.0169976	0.0306256	0.0268589	0.192575	0.0393988	0.02429	0.0602381	0.0659994	0.018345	0.11848
			CZ	0.0130794	0.00938565	0.0129634	0.0130525	0.0151352	0.0154751	0.00801851	0.00732225	0.0114936	0.0183492	0.0122679	0.0157938	0.0151995	0.0134044	0.0163962	0.0162759	0.0126661	0.0137641	0.0118063	0.0134334	0.0145421	0.0146906	0.0120105	0.0127301	0.0152737	0.0144278	0.0115315	0.0138545	0.0084159	0	0.00901821	0.00800443	0.00756075	0.0118731	0.0109989	0.0106851	0.00685639	0.0168651	0.0087905	0.0114307	0.00909535	0.00694223	0.0119022	0.0096403	0.00962905	0.0124915
			DK	0.0495645	0.0975671	0.0763216	0.0957409	0.0699735	0.0485971	0.125748	0.107051	0.0926605	0.140482	0.061565	0.187125	0.169443	0.181773	0.127095	0.176189	0.202831	0.00893518	0.195549	0.164186	0.201889	0.179872	0.15554	0.168463	0.0104448	0.00959893	0.165535	0.0090256	0.0209426	0.0100635	0	0.0213959	0.0207441	0.0215011	0.0703694	0.0225232	0.0127849	0.0227295	0.0375243	0.203245	0.0500646	0.0168745	0.0709044	0.076666	0.0290102	0.129148
			FI	0.0575207	0.105521	0.0842764	0.103695	0.0779287	0.0565534	0.1337	0.115004	0.100614	0.148434	0.0695205	0.195075	0.177393	0.189722	0.135047	0.184139	0.210779	0.0081018	0.203498	0.172136	0.209837	0.187822	0.163491	0.176413	0.00961138	0.00876555	0.173485	0.00819222	0.0289	0.00923016	0.0215753	0	0.0287014	0.0294586	0.0783244	0.0304806	0.0205344	0.0266356	0.0454809	0.211194	0.0580206	0.0119886	0.0788594	0.0846206	0.0369672	0.1371
			FR	0.037666	0.0856648	0.0644211	0.0838389	0.0580736	0.0366988	0.113843	0.0951474	0.0807587	0.128578	0.0496655	0.175217	0.157536	0.169865	0.115191	0.164281	0.190921	0.00773707	0.18364	0.152279	0.189979	0.167964	0.143633	0.156556	0.00924665	0.00840083	0.153628	0.0078275	0.0102468	0.00886543	0.0210019	0.0287797	0	0.0178996	0.0584692	0.0135569	0.0169825	0.0305782	0.0256263	0.191335	0.0381658	0.0242425	0.0590042	0.0647652	0.0171609	0.117243
			DE	0.0459593	0.0939692	0.0727202	0.0921422	0.0663709	0.0449914	0.122154	0.103454	0.0890616	0.136889	0.0579616	0.183539	0.165854	0.178187	0.1235	0.172601	0.199248	0.011282	0.191965	0.160597	0.198305	0.176285	0.15195	0.164875	0.0127916	0.0119458	0.161946	0.0113724	0.0170617	0.0124104	0.0209955	0.0287752	0.0171355	0	0.0667674	0.0188023	0.0169597	0.0305723	0.033918	0.199662	0.04646	0.0242373	0.0673024	0.0730651	0.0254025	0.125554
			IT	0.0397773	0.0994291	0.037403	0.0976663	0.0348179	0.0485636	0.0868343	0.10893	0.0945858	0.11576	0.0314861	0.148217	0.130533	0.142865	0.0881808	0.137279	0.163925	0.0105634	0.156643	0.125275	0.162982	0.140964	0.116629	0.129553	0.012073	0.0112271	0.126625	0.0106538	0.0592508	0.0116917	0.0700236	0.0778029	0.0578671	0.0669203	0	0.062577	0.0660038	0.0796002	0.0434326	0.164339	0.033615	0.0732651	0.0316009	0.0372832	0.0574848	0.0902342
			NL	0.0418252	0.0898321	0.0685846	0.0880054	0.0622357	0.0408575	0.118015	0.0993165	0.0849249	0.13275	0.0538268	0.179397	0.161713	0.174045	0.119362	0.16846	0.195105	0.0103054	0.187822	0.156456	0.194162	0.172144	0.147809	0.160733	0.011815	0.0109692	0.157805	0.0103959	0.0129931	0.0114338	0.0222282	0.0300074	0.0130028	0.0190129	0.062632	0	0.0180964	0.0318048	0.0297844	0.195519	0.0423257	0.0254696	0.063167	0.0689292	0.0212694	0.121415
			NO	0.0459251	0.0939221	0.0726793	0.0920964	0.0663321	0.044958	0.122099	0.103404	0.0890162	0.136834	0.0579242	0.183471	0.165791	0.178119	0.123447	0.172536	0.199175	0.00715806	0.191894	0.160534	0.198233	0.176219	0.151889	0.16481	0.00866763	0.00782181	0.161882	0.00724848	0.0172737	0.00828642	0.0131681	0.0207374	0.0171071	0.0178485	0.0667275	0.0187743	0	0.0225362	0.0338857	0.199589	0.0464247	0.0162164	0.0672625	0.0730232	0.0253725	0.1255
			PL	0.0577627	0.105786	0.0845303	0.103957	0.0781789	0.056794	0.133978	0.115274	0.100876	0.148714	0.0697682	0.195376	0.177687	0.190023	0.135322	0.184435	0.21109	0.0153857	0.203806	0.172429	0.210146	0.188121	0.16378	0.176708	0.0168952	0.0160494	0.173779	0.0154761	0.0291314	0.016514	0.0213386	0.0250671	0.0289331	0.0296887	0.0785765	0.0307117	0.0207629	0	0.0457195	0.211505	0.0582646	0.0205443	0.0791114	0.0848761	0.0372016	0.137377
			PT	0.0230165	0.0718352	0.0497733	0.070025	0.0434252	0.0221131	0.0991987	0.0813025	0.0669447	0.114734	0.0350168	0.160576	0.142893	0.155223	0.100546	0.149639	0.176281	0.00874798	0.169	0.137636	0.175339	0.153323	0.128991	0.141913	0.0102576	0.00941174	0.138985	0.00883841	0.0267928	0.00987634	0.0375645	0.0453428	0.0254091	0.0344618	0.0438211	0.0301189	0.0335449	0.0471409	0	0.176695	0.0235165	0.0408054	0.0443561	0.0501176	0.0250271	0.102599
			RU	0.172561	0.176924	0.145232	0.190105	0.159689	0.18138	0.125087	0.157866	0.189186	0.146822	0.162796	0.0744969	0.059167	0.0447826	0.11322	0.0684921	0.0316632	0.0109184	0.023756	0.0624943	0.0831917	0.0495125	0.0642267	0.0644017	0.012428	0.0115821	0.055451	0.0110088	0.192067	0.0120468	0.20284	0.21062	0.190683	0.199737	0.164266	0.195393	0.19882	0.212417	0.176249	0	0.166799	0.206082	0.153749	0.159976	0.190301	0.126389
			ES	0.020753	0.0794538	0.0402714	0.0776916	0.0339232	0.0285938	0.0896976	0.0889533	0.0746113	0.118622	0.0256909	0.151075	0.133393	0.145723	0.0910447	0.140139	0.166781	0.00899859	0.1595	0.128136	0.165839	0.143822	0.11949	0.132413	0.0105082	0.00966234	0.129485	0.00908901	0.0392792	0.0101269	0.0500511	0.0578296	0.0378956	0.0469484	0.0339508	0.0426054	0.0460315	0.0596276	0.0234626	0.167196	0	0.0532921	0.0348542	0.0405197	0.0375136	0.0930976
			SE	0.0531698	0.101167	0.0799241	0.0993413	0.0735769	0.0522027	0.129344	0.110649	0.0962612	0.144079	0.065169	0.190716	0.173036	0.185365	0.130692	0.179781	0.20642	0.00722862	0.199139	0.167779	0.205478	0.183464	0.159134	0.172056	0.0087382	0.00789238	0.169128	0.00731905	0.0245503	0.00835698	0.0172421	0.0121769	0.0243517	0.0251091	0.0739723	0.026131	0.0162012	0.0223026	0.0411304	0.206834	0.0536695	0	0.0745074	0.0802681	0.0326172	0.132745
			TR	0.040121	0.0998076	0.0267266	0.0980446	0.0299556	0.0489396	0.0761604	0.109309	0.0949641	0.105087	0.0312047	0.137546	0.119861	0.132193	0.0775066	0.126607	0.153254	0.011306	0.145972	0.114603	0.152311	0.130292	0.105956	0.118881	0.0128156	0.0119697	0.115953	0.0113964	0.0596275	0.0124343	0.0704008	0.0781805	0.0582438	0.0672973	0.0314413	0.0629539	0.066381	0.0799775	0.0438087	0.153669	0.034359	0.0736426	0	0.0236758	0.0578615	0.0795602
			UA	0.0461855	0.105961	0.0333532	0.104199	0.0360055	0.0550995	0.0827809	0.115461	0.101118	0.111706	0.0372702	0.14416	0.126477	0.138808	0.0841278	0.133223	0.159867	0.00944656	0.152585	0.12122	0.158924	0.136907	0.112574	0.125497	0.0109561	0.0101103	0.122569	0.00953699	0.0657855	0.0105749	0.0765576	0.0843363	0.0644018	0.0734547	0.0375226	0.0691117	0.072538	0.0861341	0.0499684	0.160281	0.0404237	0.0797988	0.0240761	0	0.0640197	0.0861808
			GB	0.0369193	0.0849235	0.0636773	0.0830971	0.0573289	0.0359518	0.113105	0.0944073	0.0800167	0.12784	0.0489202	0.174484	0.156801	0.169132	0.114452	0.163547	0.190191	0.00943732	0.182909	0.151544	0.189248	0.167231	0.142898	0.155821	0.0109469	0.0101011	0.152893	0.00952774	0.0181302	0.0105657	0.0289023	0.036681	0.0167945	0.0257994	0.0577249	0.0214564	0.0248827	0.0384788	0.0248789	0.190605	0.0374196	0.0321434	0.0582599	0.0640217	0	0.116505
		Middle East	IR	0.0982702	0.125315	0.07094	0.138496	0.0853975	0.107089	0.0647297	0.106256	0.137578	0.0935129	0.0885048	0.110355	0.0923975	0.10473	0.0425777	0.0993524	0.125792	0.0117904	0.118509	0.0871395	0.125201	0.102829	0.0784926	0.0914177	0.0132999	0.0124541	0.0884892	0.0118808	0.117778	0.0129187	0.128551	0.136331	0.116394	0.125447	0.0899748	0.121104	0.124531	0.138128	0.101958	0.126206	0.0925082	0.131793	0.0794575	0.085685	0.116011	0
			IQ	0.101406	0.128457	0.0740698	0.14164	0.0885299	0.110226	0.0678592	0.109395	0.140722	0.0966463	0.0916385	0.113493	0.0955314	0.107867	0.0457166	0.102488	0.128934	0.0153391	0.121649	0.0902727	0.128342	0.105965	0.0816242	0.0945519	0.0168487	0.0160029	0.0916231	0.0154295	0.120918	0.0164675	0.131694	0.139476	0.119535	0.128589	0.0931091	0.124245	0.127674	0.141271	0.105096	0.129348	0.0956434	0.134937	0.0825893	0.0888186	0.119152	0.0223942
			IL	0.0465469	0.106268	0.0197451	0.104505	0.0338502	0.0553978	0.0691809	0.110852	0.101424	0.0981084	0.0369095	0.130568	0.112883	0.125215	0.0705268	0.11963	0.146278	0.0119322	0.138995	0.107625	0.145334	0.123314	0.0989778	0.111903	0.0134418	0.0125959	0.108975	0.0120226	0.0660864	0.0130605	0.0768601	0.0846401	0.0647027	0.0737563	0.0380272	0.0694128	0.0728402	0.0864369	0.0502669	0.146692	0.0407848	0.080102	0.0271574	0.0333689	0.0643202	0.0725807
			KW	0.0976473	0.124692	0.0703171	0.137873	0.0847746	0.106466	0.0641068	0.105633	0.136955	0.0928899	0.0878819	0.109732	0.0917745	0.104107	0.0419546	0.0987295	0.125169	0.0118399	0.117886	0.0865166	0.124578	0.102206	0.0778697	0.0907948	0.0133495	0.0125037	0.0878663	0.0119304	0.117155	0.0129683	0.127928	0.135708	0.115771	0.124825	0.0893519	0.120481	0.123908	0.137505	0.101335	0.125584	0.0918853	0.13117	0.0788345	0.085062	0.115389	0.0192609
			OM	0.0859042	0.112948	0.058575	0.126129	0.073032	0.0947229	0.0523647	0.0938898	0.12521	0.0811472	0.0761391	0.0981649	0.0802079	0.09254	0.0313349	0.0871627	0.113601	0.0112162	0.106318	0.0749501	0.112946	0.0906388	0.0663034	0.0792281	0.0127257	0.0118799	0.0762997	0.0113066	0.105411	0.0123445	0.116184	0.123964	0.104027	0.11308	0.077609	0.108737	0.112164	0.125761	0.0895919	0.114016	0.0801422	0.119426	0.0670921	0.0733193	0.103645	0.0284232
			QA	0.0935314	0.120575	0.0662021	0.133756	0.0806592	0.10235	0.0599919	0.101517	0.132838	0.0887744	0.0837663	0.105616	0.0876589	0.0999909	0.0378409	0.0946136	0.121052	0.0112032	0.113769	0.0824011	0.120461	0.0980898	0.0737544	0.086679	0.0127127	0.0118669	0.0837507	0.0112936	0.113038	0.0123315	0.123811	0.131591	0.111654	0.120708	0.0852362	0.116364	0.119791	0.133388	0.097219	0.121466	0.0877694	0.127053	0.0747193	0.0809464	0.111272	0.0228843
			SA	0.0555722	0.115268	0.028239	0.113504	0.0426978	0.0643918	0.0602191	0.101895	0.110423	0.0891485	0.0458058	0.121612	0.103925	0.116259	0.0615643	0.110672	0.137323	0.0136326	0.13004	0.0986664	0.13638	0.114357	0.0900187	0.102945	0.0151422	0.0142964	0.100016	0.013723	0.0750822	0.014761	0.0858569	0.0936379	0.0736984	0.0827525	0.0472761	0.0784087	0.0818368	0.0954339	0.059261	0.137738	0.04981	0.0890994	0.0367575	0.0429859	0.0733157	0.0636188
			AE	0.0936835	0.120727	0.0663537	0.133909	0.080811	0.102502	0.0601434	0.101669	0.132991	0.0889263	0.0839182	0.105768	0.0878109	0.100143	0.0380078	0.0947657	0.121205	0.0115617	0.113922	0.082553	0.120614	0.098242	0.0739062	0.0868311	0.0130713	0.0122254	0.0839026	0.0116521	0.113191	0.01269	0.123964	0.131744	0.111807	0.12086	0.0853882	0.116517	0.119944	0.133541	0.0973714	0.121619	0.0879215	0.127206	0.074871	0.0810984	0.111424	0.0246206
		North America	CA	0.055515	0.0896152	0.0822711	0.0879012	0.0759233	0.0533466	0.131695	0.0990981	0.0848209	0.132465	0.067515	0.193071	0.175389	0.187718	0.133042	0.182134	0.180094	0.00832137	0.18524	0.170132	0.189273	0.185818	0.161486	0.174409	0.00983094	0.00898512	0.171481	0.00841179	0.0468959	0.00944973	0.0522224	0.0600006	0.0455923	0.0531556	0.076319	0.050222	0.0475624	0.0617988	0.0439875	0.179483	0.0560149	0.0554632	0.076854	0.0826153	0.0427122	0.135095
			MX	0.0981183	0.119442	0.124878	0.117888	0.118529	0.095677	0.162746	0.124731	0.114807	0.154241	0.11012	0.192736	0.200839	0.189722	0.175656	0.202059	0.163677	0.0106038	0.168824	0.20423	0.172857	0.192674	0.204105	0.208716	0.0121134	0.0112676	0.196546	0.0106942	0.0931985	0.0117322	0.0993906	0.10717	0.0918949	0.100323	0.118925	0.0965248	0.0947302	0.108967	0.0868301	0.163067	0.0986189	0.102632	0.11946	0.125223	0.0892863	0.17771
			TT	0.0759278	0.0863935	0.102689	0.0854313	0.0963397	0.0726212	0.128754	0.0907211	0.0823507	0.120248	0.0879303	0.188379	0.195825	0.185364	0.15347	0.197702	0.159318	0.0115693	0.164465	0.190567	0.168498	0.188317	0.18192	0.194845	0.0130789	0.0122331	0.191917	0.0116598	0.0766942	0.0126977	0.08593	0.0937098	0.0753105	0.084364	0.0967363	0.0800206	0.0812694	0.0955067	0.0660808	0.158708	0.0764286	0.0891718	0.0972713	0.103034	0.0738709	0.155524
			US	0.09748	0.119174	0.124241	0.117603	0.117892	0.0950225	0.163697	0.125215	0.114522	0.155191	0.109482	0.194409	0.202512	0.191395	0.175021	0.203733	0.165349	0.0113868	0.170496	0.205903	0.174529	0.194347	0.203472	0.21039	0.0128963	0.0120505	0.198219	0.0114772	0.0925442	0.0125151	0.0987366	0.106516	0.0912406	0.0996693	0.118288	0.0958705	0.094076	0.108313	0.0861755	0.164738	0.0979808	0.101978	0.118823	0.124586	0.0886318	0.177075
		South America	AR	0.109338	0.0845182	0.136097	0.0913883	0.129748	0.105759	0.102979	0.0739981	0.0892208	0.0944747	0.121339	0.163849	0.174691	0.188832	0.155146	0.174678	0.179973	0.0104524	0.185456	0.168937	0.146021	0.179612	0.165063	0.177619	0.0119619	0.0111161	0.173521	0.0105428	0.116719	0.0115807	0.127491	0.135271	0.115335	0.124388	0.130145	0.120045	0.123472	0.137068	0.101942	0.188188	0.109838	0.130733	0.13068	0.136442	0.114824	0.158945
			BO	0.00941218	0.00571842	0.00929617	0.00938528	0.011468	0.0118079	0.00435127	0.00365502	0.00782637	0.0146819	0.0086007	0.0121266	0.0115323	0.00973716	0.012729	0.0126087	0.00899884	0.0100968	0.00813911	0.0097662	0.0108749	0.0110234	0.00834331	0.00906284	0.0116064	0.0107606	0.0078643	0.0101873	0.00474867	0.0112252	0.00535098	0.0043372	0.00389352	0.00820584	0.00733165	0.00701787	0.00318916	0.0131978	0.00512326	0.00776351	0.00542811	0.003275	0.00823501	0.00597307	0.00596182	0.00882424
			BR	0.0854007	0.0648916	0.112157	0.0697755	0.105809	0.081807	0.0927832	0.0594971	0.0672718	0.0842806	0.0974009	0.167195	0.164487	0.178627	0.144945	0.164475	0.198435	0.00857923	0.192531	0.158733	0.163702	0.174932	0.15486	0.167415	0.0100888	0.00924299	0.163318	0.00866966	0.0927802	0.00970759	0.103552	0.11133	0.0913966	0.100449	0.106205	0.0961064	0.0995323	0.113128	0.078037	0.200163	0.0859007	0.106793	0.10674	0.112502	0.0908224	0.148743
			CL	0.131667	0.115545	0.240895	0.124032	0.152078	0.130379	0.203837	0.104192	0.121641	0.211253	0.143669	0.156372	0.178633	0.181723	0.213689	0.171493	0.164568	0.0103594	0.174471	0.180743	0.136589	0.172246	0.175925	0.187936	0.0118689	0.0110231	0.183838	0.0104498	0.129806	0.0114877	0.137248	0.145027	0.128503	0.137476	0.152474	0.133133	0.132587	0.146824	0.121132	0.167833	0.132168	0.140489	0.153009	0.158771	0.126119	0.226745
			PE	0.11231	0.125913	0.250008	0.124824	0.13272	0.111023	0.212952	0.120887	0.121743	0.220368	0.124311	0.162911	0.182272	0.177738	0.222803	0.178496	0.151712	0.00944348	0.157178	0.185119	0.143113	0.174156	0.185041	0.194121	0.0109531	0.0101072	0.185171	0.0095339	0.11045	0.0105718	0.11789	0.125669	0.109146	0.118119	0.133116	0.113776	0.11323	0.127467	0.101775	0.152686	0.112811	0.121132	0.133651	0.139413	0.106762	0.235859
			VE	0.0741679	0.0846319	0.100926	0.0836703	0.0945776	0.0708621	0.126987	0.0889588	0.0805899	0.118484	0.0861689	0.186605	0.194051	0.183591	0.151701	0.195928	0.157548	0.00956154	0.162694	0.188793	0.166727	0.186543	0.180147	0.193071	0.0110711	0.0102253	0.190143	0.00965196	0.0749337	0.0106899	0.0841684	0.0919472	0.07355	0.082603	0.0949737	0.0782599	0.0795081	0.0937449	0.0643216	0.156938	0.0746682	0.0874096	0.0955087	0.101271	0.0721109	0.153754
	Green_Grid_MDONH3ship
		GHG [kgCO2e/kgNH3]	Destination	Africa											Asia-Pacific																Europe																		Middle East
		Origin		DZ	AO	EG	GQ	LY	MA	MZ	NA	NG	ZA	TN	AU	BN	CN	IN	ID	JP	KZ	KR	MY	PG	PH	SG	TH	TM	UZ	VN	AZ	BE	CZ	DK	FI	FR	DE	IT	NL	NO	PL	PT	RU	ES	SE	TR	UA	GB	IR
		Africa	DZ	0	0.0717793	0.0422135	0.0705161	0.0366339	0.0261538	0.0866423	0.080216	0.0675756	0.11172	0.0287492	0.143093	0.126981	0.138013	0.0886356	0.133206	0.157068	0.0122737	0.150377	0.122045	0.156385	0.136406	0.114063	0.125865	0.0137833	0.0129374	0.123095	0.0123641	0.0352082	0.013402	0.0450453	0.0520157	0.0338731	0.0424902	0.0366568	0.0384372	0.0411965	0.0544628	0.0208798	0.157331	0.0189014	0.0477977	0.0371966	0.0421335	0.0337163	0.0901408
			AO	0.0724231	0	0.0967054	0.0238614	0.0911419	0.0689446	0.0637708	0.0244997	0.0229567	0.0570023	0.0832437	0.132048	0.129534	0.142206	0.111901	0.129622	0.161286	0.00923723	0.154683	0.124147	0.146048	0.138971	0.1205	0.131965	0.0107468	0.00990099	0.128134	0.00932766	0.0791009	0.0103656	0.0889362	0.0959049	0.0777659	0.0863821	0.0911204	0.0823297	0.0850877	0.0983533	0.065517	0.161577	0.0725103	0.0916875	0.0916893	0.096712	0.0776096	0.11499
			EG	0.0422339	0.0960867	0	0.0948235	0.0307357	0.0504613	0.0618378	0.0996078	0.091883	0.0890529	0.0332929	0.118289	0.102177	0.113209	0.0638312	0.108401	0.132263	0.0121783	0.125572	0.0972404	0.13158	0.111601	0.0892586	0.10106	0.0136879	0.0128421	0.0982907	0.0122687	0.0595157	0.0133067	0.0693528	0.0763231	0.0581806	0.0667977	0.0345107	0.0627447	0.065504	0.0787703	0.0451874	0.132526	0.0366356	0.0721051	0.0250449	0.0304908	0.0580239	0.0653364
			GQ	0.0705208	0.0232125	0.094808	0	0.0892429	0.0668812	0.0754364	0.0362011	0.0178454	0.0686645	0.0813437	0.143725	0.141211	0.153887	0.123575	0.141299	0.172971	0.0122516	0.166366	0.135824	0.157729	0.15065	0.132176	0.143643	0.0137612	0.0129153	0.139812	0.012342	0.0771427	0.0133799	0.0869798	0.0939502	0.0758076	0.0844247	0.0892223	0.0803717	0.083131	0.0963973	0.0635705	0.173262	0.0706088	0.0897321	0.0897911	0.0948153	0.0756508	0.126665
			LY	0.036271	0.0901451	0.0303516	0.0888813	0	0.0445136	0.0747859	0.098583	0.0859406	0.102003	0.0262091	0.131242	0.115129	0.126162	0.0767785	0.121354	0.145219	0.0139637	0.138527	0.110192	0.144536	0.124554	0.10221	0.114012	0.0154732	0.0146274	0.111243	0.0140541	0.0535699	0.015092	0.0634081	0.0703794	0.0522348	0.0608523	0.0319796	0.0567991	0.0595591	0.0728258	0.0392398	0.145482	0.030687	0.066161	0.0277923	0.0327155	0.0520777	0.0782844
			MA	0.0257294	0.0678813	0.0500198	0.0664575	0.0444537	0	0.0944551	0.0763049	0.0636186	0.10768	0.0365539	0.150913	0.134799	0.145832	0.0964476	0.141024	0.16489	0.0142431	0.158198	0.129862	0.164206	0.144224	0.121879	0.133682	0.0157527	0.0149068	0.130913	0.0143335	0.0341273	0.0153714	0.0439656	0.050937	0.0327921	0.0414097	0.0444336	0.0373564	0.0401166	0.0533833	0.0198551	0.165153	0.0258179	0.0467186	0.0450024	0.0500275	0.032635	0.0979536
			MZ	0.0875198	0.0640093	0.062702	0.0763124	0.0760252	0.0957457	0	0.0465201	0.075335	0.0359711	0.078581	0.0931711	0.0842895	0.0953178	0.0573242	0.0851479	0.114367	0.00811337	0.107677	0.0793539	0.106865	0.0937108	0.071374	0.0831722	0.00962295	0.00877713	0.0804035	0.0082038	0.104796	0.00924173	0.11463	0.121598	0.103461	0.112077	0.0797981	0.108024	0.110782	0.124047	0.0904713	0.114629	0.0819219	0.117381	0.0703352	0.0757789	0.103305	0.0601074
			NA	0.0812161	0.0248641	0.100582	0.0372104	0.099933	0.0777238	0.0466421	0	0.0362039	0.0398756	0.0920354	0.114912	0.112399	0.125069	0.094768	0.112486	0.144147	0.00754102	0.137544	0.107012	0.128911	0.121834	0.103365	0.114829	0.00905059	0.00820477	0.110999	0.00763144	0.0878781	0.00866938	0.0977123	0.10468	0.0865431	0.0951588	0.099911	0.0911068	0.093864	0.107129	0.0742812	0.144438	0.0813028	0.100463	0.10048	0.105502	0.086387	0.0978562
			NG	0.0678525	0.0225838	0.0921377	0.0181218	0.0865733	0.0643152	0.0747304	0.0354694	0	0.06796	0.0786745	0.143014	0.1405	0.153174	0.122865	0.140588	0.172257	0.0109701	0.165653	0.135113	0.157017	0.149938	0.131466	0.142932	0.0124796	0.0116338	0.139101	0.0110605	0.0744735	0.0120984	0.0843098	0.0912795	0.0731384	0.0817551	0.0865522	0.0777024	0.0804611	0.0937272	0.0609025	0.172548	0.0679402	0.0870617	0.0871211	0.0921446	0.0729818	0.125955
			ZA	0.11081	0.0554299	0.0881167	0.0677378	0.101446	0.107183	0.0341476	0.0379319	0.0667608	0	0.104005	0.105524	0.101481	0.114161	0.0822975	0.101569	0.133251	0.0166057	0.126645	0.0960932	0.119532	0.110923	0.0915717	0.103376	0.0181153	0.0172694	0.100083	0.0166961	0.117348	0.017734	0.127188	0.134161	0.116013	0.124631	0.105224	0.120577	0.123339	0.136606	0.103743	0.133543	0.10735	0.129942	0.0957548	0.101203	0.115855	0.08539
			TN	0.0288927	0.0827432	0.0334157	0.0814802	0.0267167	0.0371199	0.0778423	0.0911794	0.0785398	0.105057	0	0.134291	0.11818	0.129211	0.0798359	0.124404	0.148265	0.0116066	0.141574	0.113244	0.147582	0.127604	0.105262	0.117063	0.0131162	0.0122704	0.114294	0.011697	0.0461736	0.012735	0.0560104	0.0629804	0.0448386	0.0534555	0.0291971	0.0494026	0.0521616	0.0654278	0.0318459	0.148528	0.0234544	0.0587625	0.0291697	0.0341063	0.0446819	0.0813409
		Asia-Pacific	AU	0.14263	0.130951	0.117801	0.143258	0.13113	0.150858	0.0918241	0.113455	0.14228	0.105966	0.133688	0	0.0483877	0.0554361	0.089293	0.0400534	0.0635558	0.0145051	0.0612561	0.0478144	0.0384651	0.0467298	0.0466824	0.0563763	0.0160146	0.0151688	0.0521524	0.0145955	0.159915	0.0156334	0.169754	0.176726	0.15858	0.167198	0.134906	0.163145	0.165905	0.179172	0.145585	0.0680659	0.137031	0.172507	0.125438	0.130885	0.158423	0.100893
			BN	0.126618	0.128538	0.10179	0.140845	0.115118	0.134846	0.0830423	0.111043	0.139868	0.102027	0.117676	0.0484924	0	0.0377542	0.0730354	0.0362624	0.0537133	0.0140165	0.0472393	0.024504	0.058731	0.0315791	0.0282299	0.0336037	0.0155261	0.0146802	0.0270527	0.0141069	0.143902	0.0151449	0.153741	0.160712	0.142567	0.151185	0.118894	0.147132	0.149892	0.163158	0.129572	0.0541942	0.121019	0.156494	0.109427	0.114874	0.14241	0.0846354
			CN	0.137958	0.141521	0.113133	0.153827	0.126459	0.146185	0.0943862	0.124027	0.15285	0.115014	0.129017	0.0558555	0.038071	0	0.0843811	0.0463319	0.041893	0.0125408	0.0344015	0.0391118	0.0651332	0.0303051	0.0395068	0.0407354	0.0140504	0.0132046	0.031029	0.0126313	0.15524	0.0136692	0.165078	0.172048	0.153905	0.162522	0.130235	0.158469	0.161229	0.174495	0.140912	0.041283	0.132359	0.16783	0.120768	0.126214	0.153748	0.0959795
			IN	0.0880593	0.110693	0.0632301	0.123	0.0765585	0.0962879	0.0558561	0.0931969	0.122023	0.082638	0.0791168	0.0891882	0.0728263	0.0838606	0	0.0792411	0.102919	0.0150003	0.0962264	0.0678893	0.102497	0.0822522	0.0599063	0.0717097	0.0165099	0.015664	0.0689402	0.0150907	0.105345	0.0161286	0.115184	0.122156	0.10401	0.112628	0.080335	0.108575	0.111335	0.124602	0.0910142	0.103182	0.0824607	0.117937	0.0708673	0.0763146	0.103853	0.039296
			ID	0.132659	0.128441	0.10783	0.140748	0.121158	0.140887	0.0837135	0.110945	0.139771	0.101928	0.123716	0.0399683	0.0360722	0.0458262	0.079262	0	0.0584844	0.0149014	0.0557338	0.0360225	0.0521568	0.036727	0.0346432	0.0445992	0.016411	0.0155651	0.0404043	0.0149918	0.149945	0.0160297	0.159783	0.166755	0.148609	0.157227	0.124934	0.153174	0.155934	0.169201	0.135614	0.0625728	0.12706	0.162537	0.115467	0.120914	0.148452	0.0908629
			JP	0.157138	0.160731	0.132314	0.173036	0.14564	0.165366	0.113568	0.143237	0.172059	0.134224	0.148198	0.0641033	0.054158	0.0420231	0.103564	0.0591174	0	0.0119339	0.0257369	0.0567257	0.0688287	0.0448945	0.0587785	0.059309	0.0134435	0.0125976	0.0510718	0.0120243	0.17442	0.0130623	0.184257	0.191227	0.173085	0.181702	0.149415	0.177649	0.180408	0.193674	0.160092	0.0294332	0.15154	0.187009	0.13995	0.145395	0.172928	0.115162
			KZ	0.0121519	0.00845809	0.0120358	0.012125	0.0142077	0.0145476	0.00709094	0.00639469	0.010566	0.0174216	0.0113404	0.0148663	0.0142719	0.0124768	0.0154687	0.0153484	0.0117385	0	0.0108788	0.0125059	0.0136146	0.0137631	0.011083	0.0118025	0.0143461	0.0135003	0.010604	0.0129269	0.00748834	0.0139649	0.00809064	0.00707686	0.00663318	0.0109455	0.0100713	0.00975754	0.00592882	0.0159375	0.00786293	0.0105032	0.00816778	0.00601467	0.0109747	0.00871273	0.00870148	0.0115639
			KR	0.150593	0.154272	0.12577	0.166577	0.139096	0.15882	0.107025	0.13678	0.1656	0.127768	0.141653	0.0619544	0.047836	0.0346836	0.0970215	0.0565179	0.025889	0.0112272	0	0.0507816	0.0697333	0.0390964	0.052049	0.0524631	0.0127367	0.0118909	0.0441826	0.0113176	0.167874	0.0123555	0.17771	0.18468	0.166539	0.175155	0.14287	0.171103	0.173862	0.187128	0.153546	0.0223269	0.144995	0.180462	0.133405	0.138851	0.166382	0.108619
			MY	0.121984	0.123453	0.097159	0.135759	0.110486	0.130212	0.0784125	0.105959	0.134782	0.0969456	0.113043	0.0482297	0.0248169	0.0391067	0.0684074	0.0365245	0.0565912	0.0125647	0.0504958	0	0.0607942	0.0345756	0.0234459	0.030768	0.0140743	0.0132285	0.0255119	0.0126551	0.139267	0.0136931	0.149104	0.156075	0.137932	0.146549	0.114261	0.142496	0.145255	0.158522	0.124938	0.0573628	0.116386	0.151856	0.104795	0.110241	0.137775	0.0800059
			PG	0.156136	0.14517	0.131309	0.157476	0.144637	0.164364	0.105741	0.127675	0.156499	0.120187	0.147194	0.038686	0.0588463	0.0649341	0.102818	0.0524616	0.0685009	0.0134761	0.0692556	0.0605999	0	0.0562285	0.0593516	0.0690013	0.0149857	0.0141399	0.0630031	0.0135665	0.17342	0.0146045	0.183258	0.190229	0.172085	0.180702	0.148412	0.176649	0.179409	0.192676	0.15909	0.0760649	0.150538	0.186011	0.138946	0.144392	0.171928	0.114475
			PH	0.13613	0.138065	0.111303	0.150371	0.12463	0.144358	0.0925556	0.12057	0.149394	0.111555	0.127188	0.0469241	0.0316691	0.0300776	0.0825493	0.037007	0.0445381	0.0135982	0.0385878	0.0343536	0.0562025	0	0.0375849	0.0386389	0.0151078	0.0142619	0.0304445	0.0136886	0.153414	0.0147266	0.163252	0.170223	0.152079	0.160696	0.128406	0.156643	0.159403	0.17267	0.139084	0.0454698	0.130532	0.166005	0.118939	0.124386	0.151922	0.0941488
			SG	0.114247	0.120049	0.0894239	0.132354	0.10275	0.122474	0.0706784	0.102557	0.131377	0.092672	0.105307	0.047348	0.0287941	0.0397525	0.0606748	0.0353965	0.0588933	0.011395	0.0520131	0.0236978	0.0597951	0.0380576	0	0.0275462	0.0129046	0.0120588	0.0247626	0.0114854	0.131528	0.0125234	0.141365	0.148334	0.130193	0.13881	0.106524	0.134757	0.137516	0.150782	0.1172	0.059054	0.108649	0.144117	0.097059	0.102504	0.130036	0.0722721
			TH	0.125924	0.131393	0.1011	0.143698	0.114426	0.134152	0.0823542	0.113899	0.142721	0.104348	0.116984	0.0569138	0.03404	0.0408542	0.0723499	0.0452236	0.0592978	0.0119865	0.052301	0.0308924	0.0693178	0.0389847	0.0274189	0	0.0134961	0.0126503	0.0245695	0.0120769	0.143206	0.0131149	0.153043	0.160013	0.141871	0.150488	0.118201	0.146435	0.149194	0.162461	0.128878	0.0591532	0.120326	0.155795	0.108736	0.114181	0.141714	0.0839477
			TM	0.0133928	0.00969903	0.0132768	0.0133659	0.0154486	0.0157885	0.00833189	0.00763563	0.011807	0.0186626	0.0125813	0.0161072	0.0155129	0.0137178	0.0167096	0.0165893	0.0129794	0.0140775	0.0121197	0.0137468	0.0148555	0.015004	0.0123239	0.0130435	0	0.0147412	0.0118449	0.0141679	0.00872928	0.0152058	0.00933159	0.00831781	0.00787413	0.0121865	0.0113123	0.0109985	0.00716977	0.0171784	0.00910387	0.0117441	0.00940873	0.00725561	0.0122156	0.00995368	0.00994243	0.0128049
			UZ	0.0126975	0.00900372	0.0125815	0.0126706	0.0147533	0.0150932	0.00763658	0.00694032	0.0111117	0.0179672	0.011886	0.0154119	0.0148176	0.0130225	0.0160143	0.015894	0.0122841	0.0133821	0.0114244	0.0130515	0.0141602	0.0143087	0.0116286	0.0123481	0.0148917	0	0.0111496	0.0134726	0.00803397	0.0145105	0.00863628	0.0076225	0.00717882	0.0114911	0.0106169	0.0103032	0.00647446	0.0164831	0.00840857	0.0110488	0.00871342	0.0065603	0.0115203	0.00925837	0.00924712	0.0121095
			VN	0.123361	0.127767	0.0985383	0.140072	0.111864	0.131588	0.0797932	0.110275	0.139094	0.101263	0.114421	0.0529009	0.0277018	0.0313599	0.0697901	0.0412406	0.0512709	0.0110013	0.0442309	0.0258485	0.0635298	0.0310029	0.0248473	0.0247816	0.0125108	0.011665	0	0.0110917	0.140641	0.0121296	0.150477	0.157447	0.139306	0.147923	0.115638	0.14387	0.146629	0.159895	0.126314	0.0511262	0.117763	0.153229	0.106173	0.111618	0.139149	0.0813869
		Europe	AZ	0.0122262	0.00853242	0.0121102	0.0121993	0.014282	0.0146219	0.00716527	0.00646902	0.0106404	0.0174959	0.0114147	0.0149406	0.0143463	0.0125512	0.015543	0.0154227	0.0118128	0.0129108	0.0109531	0.0125802	0.0136889	0.0138374	0.0111573	0.0118768	0.0144204	0.0135746	0.0106783	0	0.00756267	0.0140392	0.00816498	0.00715119	0.00670752	0.0110198	0.0101456	0.00983187	0.00600316	0.0160118	0.00793726	0.0105775	0.00824211	0.006089	0.011049	0.00878706	0.00877581	0.0116382
			BE	0.0360301	0.0792693	0.0603111	0.0779492	0.054748	0.0353726	0.104727	0.0876888	0.075009	0.119056	0.0468501	0.161166	0.145058	0.156087	0.106722	0.151281	0.175136	0.00844005	0.168446	0.140122	0.174453	0.154479	0.132142	0.143941	0.00994963	0.0091038	0.141172	0.00853047	0	0.00956841	0.0194505	0.0264188	0.00937126	0.0166496	0.0547263	0.0126555	0.0155731	0.0288676	0.0247041	0.175398	0.036117	0.0222016	0.0552952	0.0603175	0.0170517	0.108226
			CZ	0.0130794	0.00938565	0.0129634	0.0130525	0.0151352	0.0154751	0.00801851	0.00732225	0.0114936	0.0183492	0.0122679	0.0157938	0.0151995	0.0134044	0.0163962	0.0162759	0.0126661	0.0137641	0.0118063	0.0134334	0.0145421	0.0146906	0.0120105	0.0127301	0.0152737	0.0144278	0.0115315	0.0138545	0.0084159	0	0.00901821	0.00800443	0.00756075	0.0118731	0.0109989	0.0106851	0.00685639	0.0168651	0.0087905	0.0114307	0.00909535	0.00694223	0.0119022	0.0096403	0.00962905	0.0124915
			DK	0.045759	0.0889998	0.0700408	0.0876795	0.0644775	0.0451014	0.114459	0.0974196	0.0847393	0.128788	0.0565794	0.170899	0.15479	0.165819	0.116453	0.161014	0.18487	0.00893518	0.17818	0.149855	0.184187	0.164212	0.141874	0.153673	0.0104448	0.00959893	0.150904	0.0090256	0.019344	0.0100635	0	0.0197176	0.019085	0.0201694	0.0644559	0.020988	0.0117941	0.0217446	0.0344328	0.185132	0.0458461	0.0155149	0.0650248	0.0700473	0.0267802	0.117957
			FI	0.0529053	0.0961435	0.0771858	0.0948234	0.0716228	0.0522479	0.121601	0.104563	0.0918833	0.13593	0.063725	0.178038	0.161931	0.172959	0.123596	0.168154	0.192008	0.0081018	0.185318	0.156995	0.191326	0.171352	0.149015	0.160813	0.00961138	0.00876555	0.158045	0.00819222	0.0264915	0.00923016	0.019897	0	0.0262324	0.0273171	0.071601	0.0281355	0.0187529	0.025214	0.0415795	0.192271	0.0529922	0.0110022	0.07217	0.0771921	0.0339273	0.1251
			FR	0.0348459	0.0780829	0.0591257	0.076763	0.053563	0.0341885	0.10354	0.0865018	0.0738229	0.117868	0.0456653	0.159976	0.143869	0.154897	0.105535	0.150092	0.173945	0.00773707	0.167256	0.138933	0.173263	0.15329	0.130953	0.142751	0.00924665	0.00840083	0.139983	0.0078275	0.00952296	0.00886543	0.0193428	0.0263107	0	0.0167893	0.0535411	0.0127372	0.0154945	0.0287598	0.0235203	0.174208	0.0349326	0.0220936	0.05411	0.059132	0.0159119	0.107038
			DE	0.0427025	0.0859507	0.0669881	0.0846296	0.0614236	0.0420444	0.111414	0.0943721	0.0816892	0.125743	0.0535247	0.167862	0.151751	0.162782	0.113407	0.157975	0.181835	0.011282	0.175144	0.146815	0.181152	0.161174	0.138833	0.150634	0.0127916	0.0119458	0.147865	0.0113724	0.0160369	0.0124104	0.0196639	0.0266337	0.0160252	0	0.0614026	0.0178262	0.0158007	0.0290813	0.0313753	0.182098	0.0427903	0.0224159	0.0619715	0.0669952	0.0237212	0.114912
			IT	0.0370236	0.0908411	0.0348573	0.0895784	0.0327103	0.0452214	0.0792804	0.0992766	0.0866381	0.106494	0.0294213	0.135726	0.119616	0.130646	0.0812745	0.12584	0.149699	0.0105634	0.143008	0.11468	0.149016	0.129039	0.106699	0.118499	0.012073	0.0112271	0.11573	0.0106538	0.054274	0.0116917	0.0641101	0.0710795	0.052939	0.0615555	0	0.0575029	0.0602615	0.0735274	0.0399472	0.149961	0.0310619	0.0668618	0.0294919	0.0344424	0.0527824	0.0827791
			NL	0.0388591	0.0821041	0.0631431	0.0807834	0.0575791	0.0382012	0.107565	0.0905249	0.0778431	0.121895	0.0496805	0.16401	0.1479	0.158931	0.10956	0.154124	0.177983	0.0103054	0.171292	0.142964	0.1773	0.157323	0.134983	0.146783	0.011815	0.0109692	0.144014	0.0103959	0.012253	0.0114338	0.020693	0.0276623	0.0121831	0.0180368	0.0575578	0	0.0167426	0.0301103	0.0275323	0.178245	0.0389465	0.0234447	0.0581268	0.0631499	0.0198788	0.111064
			NO	0.0422907	0.0855259	0.0665696	0.0842062	0.0610072	0.0416334	0.110982	0.0939444	0.0812661	0.12531	0.0531097	0.167416	0.151309	0.162337	0.112977	0.157532	0.181385	0.00715806	0.174695	0.146374	0.180702	0.16073	0.138394	0.150192	0.00866763	0.00782181	0.147423	0.00724848	0.0158491	0.00828642	0.0121773	0.0189559	0.0156191	0.0166895	0.0609851	0.0174205	0	0.0214052	0.0309654	0.181647	0.0423773	0.0147535	0.0615541	0.0665757	0.0233137	0.11448
			PL	0.0537979	0.0970589	0.0780902	0.0957365	0.0725235	0.0531389	0.122529	0.105483	0.0927957	0.13686	0.0646233	0.178991	0.162876	0.17391	0.124521	0.169101	0.192969	0.0153857	0.186277	0.157938	0.192285	0.172302	0.149955	0.161759	0.0168952	0.0160494	0.158989	0.0154761	0.0273735	0.016514	0.0203537	0.0236455	0.0271147	0.0281978	0.0725037	0.0290172	0.0196319	0	0.0424687	0.193232	0.0538867	0.0194414	0.0730725	0.0780981	0.0348123	0.126028
			PT	0.0216391	0.0656208	0.0459206	0.0643151	0.0403573	0.0210397	0.0903377	0.0740259	0.0613749	0.105394	0.0324593	0.146777	0.130669	0.141698	0.0923326	0.136893	0.160748	0.00874798	0.154058	0.125733	0.160065	0.140091	0.117753	0.129552	0.0102576	0.00941174	0.126783	0.00883841	0.024638	0.00987634	0.034473	0.0414414	0.023303	0.0319191	0.0403357	0.0278668	0.0306245	0.0438901	0	0.16101	0.0217261	0.0372241	0.0409046	0.0459271	0.0231468	0.0938366
			RU	0.157611	0.161231	0.132788	0.173536	0.146113	0.165838	0.114043	0.143739	0.172559	0.134727	0.14867	0.0688282	0.0548555	0.0416306	0.10404	0.0634209	0.0296515	0.0109184	0.0223934	0.0577137	0.076607	0.0460433	0.0591555	0.0593806	0.012428	0.0115821	0.0511439	0.0110088	0.174891	0.0120468	0.184727	0.191697	0.173556	0.182172	0.149888	0.17812	0.180878	0.194144	0.160563	0	0.152012	0.187479	0.140423	0.145868	0.173399	0.115637
			ES	0.0196072	0.0725608	0.0373171	0.0712987	0.0317537	0.0269465	0.0817351	0.0809952	0.0683585	0.108947	0.0240156	0.138175	0.122067	0.133096	0.0837298	0.128291	0.152147	0.00899859	0.145456	0.117131	0.151464	0.131489	0.109151	0.12095	0.0105082	0.00966234	0.118181	0.00908901	0.0359974	0.0101269	0.0458326	0.0528012	0.0346625	0.0432786	0.0313977	0.0392263	0.0419841	0.0552497	0.0216722	0.152409	0	0.0485838	0.0323011	0.0372364	0.0345062	0.0852339
			SE	0.0488745	0.0921099	0.0731536	0.0907902	0.0675911	0.0482173	0.117566	0.100529	0.0878502	0.131894	0.0596936	0.174	0.157894	0.168921	0.119561	0.164117	0.187969	0.00722862	0.18128	0.152958	0.187287	0.167314	0.144979	0.156776	0.0087382	0.00789238	0.154008	0.00731905	0.022462	0.00835698	0.0158824	0.0111905	0.0222029	0.0232877	0.067569	0.024106	0.0147383	0.0211996	0.0375492	0.188231	0.0489612	0	0.068138	0.0731597	0.0298974	0.121065
			TR	0.0374042	0.0912536	0.0252327	0.0899906	0.0283644	0.0456313	0.0696583	0.0996896	0.0870502	0.0968724	0.0292344	0.126106	0.109995	0.121026	0.0716521	0.11622	0.14008	0.011306	0.133389	0.105059	0.139397	0.119419	0.0970777	0.108878	0.0128156	0.0119697	0.106109	0.0113964	0.0546847	0.0124343	0.0645212	0.0714911	0.0533496	0.0619664	0.0293323	0.0579137	0.0606725	0.0739386	0.0403572	0.140342	0.0318059	0.0672732	0	0.0221569	0.053193	0.073157
			UA	0.0427385	0.096668	0.0310775	0.0954057	0.0336855	0.0510521	0.0754969	0.105103	0.0924655	0.102709	0.0345696	0.131939	0.11583	0.126859	0.0774915	0.122054	0.14591	0.00944656	0.13922	0.110894	0.145227	0.125252	0.102913	0.114713	0.0109561	0.0101103	0.111944	0.00953699	0.0601036	0.0105749	0.069939	0.0769078	0.0587686	0.0673848	0.0346819	0.0633324	0.0660905	0.0793562	0.0457779	0.146173	0.0371405	0.0726904	0.0225572	0	0.0586122	0.0789957
			GB	0.0343249	0.0775673	0.0586075	0.0762468	0.0530439	0.0336672	0.103027	0.0859874	0.0733066	0.117356	0.0451457	0.159469	0.14336	0.154389	0.105022	0.149584	0.17344	0.00943732	0.16675	0.138424	0.172757	0.152782	0.130443	0.142243	0.0109469	0.0101011	0.139474	0.00952774	0.0168369	0.0105657	0.0266723	0.0336411	0.0155455	0.0241182	0.0530225	0.0200658	0.0228238	0.0360895	0.0229985	0.173703	0.0344122	0.0294237	0.0535914	0.0586142	0	0.106526
		Middle East	IR	0.0902428	0.114456	0.0654189	0.126762	0.0787449	0.0984701	0.0593252	0.0969632	0.125784	0.0864089	0.081302	0.101465	0.0851061	0.0961376	0.0399848	0.0915197	0.115192	0.0117904	0.1085	0.0801698	0.114828	0.0945299	0.0721882	0.0839892	0.0132999	0.0124541	0.08122	0.0118808	0.107524	0.0129187	0.117361	0.124331	0.106189	0.114806	0.0825197	0.110753	0.113512	0.126778	0.0931961	0.115454	0.0846445	0.120113	0.0730542	0.0784999	0.106032	0
			IQ	0.0934183	0.117638	0.0685885	0.129946	0.0819172	0.101647	0.0624945	0.100142	0.128969	0.0895822	0.0844755	0.104642	0.0882799	0.0993144	0.0431621	0.0946947	0.118373	0.0153391	0.111681	0.0833428	0.118009	0.097706	0.0753596	0.0871632	0.0168487	0.0160029	0.0843937	0.0154295	0.110705	0.0164675	0.120544	0.127516	0.10937	0.117988	0.0856939	0.113934	0.116695	0.129962	0.0963733	0.118636	0.0878196	0.123297	0.0762259	0.0816734	0.109212	0.0216275
			IL	0.0432961	0.097177	0.0189519	0.0959138	0.031958	0.0515525	0.0633795	0.101149	0.0929734	0.0905943	0.0344715	0.119829	0.103718	0.11475	0.065373	0.109943	0.133804	0.0119322	0.127113	0.0987816	0.13312	0.113142	0.0907999	0.102601	0.0134418	0.0125959	0.0998318	0.0120226	0.0606066	0.0130605	0.0704435	0.0774137	0.0592715	0.0678885	0.0353694	0.0638356	0.0665948	0.079861	0.0462785	0.134067	0.0376978	0.0731957	0.0255838	0.031015	0.0591148	0.0668781
			KW	0.0896819	0.113895	0.0648579	0.126201	0.0781839	0.0979092	0.0587641	0.0964023	0.125223	0.0858479	0.080741	0.100904	0.0845452	0.0955767	0.0394236	0.0909588	0.114631	0.0118399	0.10794	0.0796088	0.114267	0.0939689	0.0716272	0.0834282	0.0133495	0.0125037	0.0806591	0.0119304	0.106963	0.0129683	0.1168	0.12377	0.105628	0.114245	0.0819588	0.110192	0.112951	0.126218	0.0926352	0.114893	0.0840836	0.119552	0.0724932	0.0779389	0.105471	0.0184604
			OM	0.0789625	0.103175	0.0541396	0.11548	0.0674652	0.0871896	0.0480459	0.0856824	0.114503	0.075129	0.070022	0.090344	0.0739861	0.0850171	0.0297245	0.0803995	0.10407	0.0112162	0.0973794	0.0690499	0.103649	0.0834094	0.0610685	0.0728691	0.0127257	0.0118799	0.0701	0.0113066	0.0962429	0.0123445	0.106079	0.113049	0.0949079	0.103525	0.0712397	0.0994719	0.102231	0.115497	0.0819155	0.104333	0.0733643	0.108831	0.0617746	0.0672199	0.0947513	0.0267213
			QA	0.085886	0.110098	0.0610631	0.122403	0.0743887	0.0941131	0.0549694	0.0926059	0.121426	0.0820525	0.0769455	0.0971075	0.0807496	0.0917806	0.0356301	0.087163	0.110834	0.0112032	0.104143	0.0758134	0.110471	0.090173	0.0678321	0.0796326	0.0127127	0.0118669	0.0768635	0.0112936	0.103166	0.0123315	0.113003	0.119973	0.101831	0.110448	0.0781632	0.106395	0.109154	0.12242	0.088839	0.111096	0.0802878	0.115755	0.0686981	0.0741434	0.101675	0.0216913
			SA	0.0516472	0.105506	0.0268204	0.104242	0.0401477	0.0598753	0.0554002	0.0931739	0.101301	0.0826169	0.0427055	0.111856	0.0957424	0.106775	0.057393	0.101968	0.125832	0.0136326	0.11914	0.0908057	0.125148	0.105167	0.0828233	0.0946256	0.0151422	0.0142964	0.0918563	0.013723	0.0689312	0.014761	0.0787692	0.0857403	0.0675961	0.0762135	0.0439235	0.0721603	0.0749202	0.0881868	0.0546014	0.126095	0.0460487	0.0815219	0.0344567	0.0399033	0.0674391	0.0588987
			AE	0.0860573	0.11027	0.0612338	0.122575	0.0745597	0.0942846	0.0551401	0.0927775	0.121598	0.0822236	0.0771167	0.0972791	0.0809208	0.0919521	0.0358147	0.0873343	0.111006	0.0115617	0.104315	0.0759845	0.110642	0.0903444	0.068003	0.0798038	0.0130713	0.0122254	0.0770347	0.0116521	0.103338	0.01269	0.113175	0.120145	0.102003	0.11062	0.0783344	0.106567	0.109326	0.122592	0.0890105	0.111268	0.0804591	0.115927	0.068869	0.0743145	0.101847	0.0233008
		North America	CA	0.0511046	0.0817234	0.0753854	0.0805051	0.0698224	0.0493567	0.119801	0.0901428	0.077565	0.121452	0.0619245	0.176239	0.160132	0.17116	0.121796	0.166355	0.16417	0.00832137	0.168762	0.155196	0.172676	0.169553	0.147216	0.159014	0.00983094	0.00898512	0.156246	0.00841179	0.0428499	0.00944973	0.0477413	0.0547096	0.0415877	0.0488515	0.0698006	0.0460787	0.0433114	0.0571584	0.040244	0.163502	0.0511916	0.0504924	0.0703696	0.0753918	0.0391634	0.1233
			MX	0.089995	0.109015	0.114279	0.107941	0.108715	0.0879992	0.148204	0.113626	0.105001	0.141434	0.100817	0.176148	0.18345	0.173192	0.160697	0.184657	0.149478	0.0106038	0.154071	0.186366	0.157985	0.17599	0.186121	0.190374	0.0121134	0.0112676	0.179215	0.0106942	0.0850988	0.0117322	0.090776	0.0977455	0.0838365	0.0918859	0.108694	0.0883277	0.0863458	0.100193	0.0793514	0.14881	0.0900825	0.0935278	0.109263	0.114286	0.0816587	0.162202
			TT	0.0699375	0.0790992	0.0942236	0.0785634	0.0886589	0.0671562	0.117433	0.0828383	0.0756229	0.110662	0.08076	0.172282	0.178988	0.169325	0.140644	0.180792	0.14561	0.0115693	0.150204	0.174052	0.154117	0.172124	0.16607	0.177871	0.0130789	0.0122331	0.175102	0.0116598	0.0702039	0.0126977	0.0786445	0.0856145	0.0688688	0.0774857	0.0886381	0.0734329	0.0742141	0.088062	0.0606024	0.144942	0.0700253	0.0813966	0.089207	0.0942308	0.0677524	0.142149
			US	0.089488	0.108844	0.113774	0.107755	0.108209	0.0874774	0.14914	0.114139	0.104815	0.142369	0.10031	0.17774	0.185042	0.174783	0.160193	0.186249	0.151068	0.0113868	0.155662	0.187958	0.159575	0.177582	0.185619	0.191967	0.0128963	0.0120505	0.180807	0.0114772	0.0845772	0.0125151	0.0902548	0.0972247	0.0833149	0.0913646	0.108188	0.0878062	0.0858244	0.0996722	0.0788296	0.1504	0.0895757	0.0930068	0.108757	0.113781	0.0811369	0.161698
		South America	AR	0.100167	0.0772932	0.124451	0.0838684	0.118887	0.0971388	0.0939282	0.067552	0.0817569	0.0871583	0.110989	0.149908	0.159696	0.17237	0.142062	0.159784	0.164259	0.0104524	0.169158	0.154309	0.133606	0.164117	0.150662	0.162127	0.0119619	0.0111161	0.158297	0.0105428	0.106439	0.0115807	0.116275	0.123244	0.105104	0.11372	0.118866	0.109667	0.112426	0.125692	0.093057	0.171603	0.100254	0.119026	0.119435	0.124458	0.104831	0.145152
			BO	0.00941218	0.00571842	0.00929617	0.00938528	0.011468	0.0118079	0.00435127	0.00365502	0.00782637	0.0146819	0.0086007	0.0121266	0.0115323	0.00973716	0.012729	0.0126087	0.00899884	0.0100968	0.00813911	0.0097662	0.0108749	0.0110234	0.00834331	0.00906284	0.0116064	0.0107606	0.0078643	0.0101873	0.00474867	0.0112252	0.00535098	0.0043372	0.00389352	0.00820584	0.00733165	0.00701787	0.00318916	0.0131978	0.00512326	0.00776351	0.00542811	0.003275	0.00823501	0.00597307	0.00596182	0.00882424
			BR	0.0782613	0.0593011	0.102543	0.064073	0.0969794	0.0752193	0.0844976	0.0542135	0.0616562	0.0777298	0.0890814	0.152772	0.150258	0.16293	0.132626	0.150346	0.180846	0.00857923	0.175406	0.144872	0.149484	0.159694	0.141224	0.152689	0.0100888	0.00924299	0.148858	0.00866966	0.0845315	0.00970759	0.0943664	0.101335	0.0831965	0.0918125	0.0969577	0.0877603	0.090518	0.103783	0.0711808	0.1823	0.0783483	0.0971175	0.0975266	0.102549	0.0828658	0.135715
			CL	0.120431	0.105453	0.219588	0.113497	0.139151	0.119482	0.185488	0.0949561	0.111182	0.193172	0.131253	0.143111	0.163267	0.165907	0.195204	0.156883	0.150264	0.0103594	0.159175	0.16502	0.125035	0.157421	0.160514	0.171485	0.0118689	0.0110231	0.167655	0.0104498	0.118312	0.0114877	0.125124	0.132093	0.11705	0.125594	0.13913	0.121541	0.120693	0.134541	0.110471	0.153114	0.120519	0.127875	0.139699	0.144722	0.115076	0.206698
			PE	0.102772	0.114782	0.227776	0.114131	0.121491	0.101824	0.193678	0.110029	0.11119	0.201362	0.113593	0.148962	0.166485	0.162204	0.203393	0.163156	0.138506	0.00944348	0.14339	0.168907	0.130873	0.15907	0.168705	0.177015	0.0109531	0.0101072	0.168779	0.0095339	0.100653	0.0105718	0.107464	0.114433	0.0993911	0.107935	0.12147	0.103882	0.103034	0.116882	0.0928127	0.139277	0.10286	0.110216	0.122039	0.127062	0.0974172	0.214887
			VE	0.0681541	0.0773141	0.0924369	0.0767787	0.0868732	0.0653734	0.115642	0.0810523	0.0738385	0.108873	0.0789749	0.170485	0.17719	0.167529	0.138851	0.178993	0.143816	0.00956154	0.148409	0.172254	0.152323	0.170327	0.164274	0.176073	0.0110711	0.0102253	0.173304	0.00965196	0.0684198	0.0106899	0.0768594	0.0838283	0.0670848	0.0757011	0.0868518	0.0716487	0.0724293	0.0862766	0.0588196	0.143148	0.0682413	0.0796108	0.0874208	0.0924436	0.0659687	0.140356
	Green_Grid_NH3ship
		GHG [kgCO2e/kgNH3]	Destination	Africa											Asia-Pacific																Europe																		Middle East
		Origin		DZ	AO	EG	GQ	LY	MA	MZ	NA	NG	ZA	TN	AU	BN	CN	IN	ID	JP	KZ	KR	MY	PG	PH	SG	TH	TM	UZ	VN	AZ	BE	CZ	DK	FI	FR	DE	IT	NL	NO	PL	PT	RU	ES	SE	TR	UA	GB	IR
		Africa	DZ	0	0.00814849	0.0115924	0.011795	0.0137339	0.014032	0.00684934	0.00612889	0.0102304	0.0172433	0.0108472	0.0148391	0.0141746	0.0124374	0.0152001	0.0152741	0.0117906	0.0122737	0.0109036	0.0123944	0.0136547	0.0137105	0.0109426	0.0117112	0.0137833	0.0129374	0.0105057	0.0123641	0.00703528	0.013402	0.00767407	0.00669224	0.00617825	0.0105075	0.00961381	0.00930825	0.00550555	0.0155272	0.00735279	0.0105624	0.00764889	0.00561737	0.0105157	0.00828214	0.00823783	0.0113182
			AO	0.00865874	0	0.00858586	0.0085506	0.0107438	0.0110443	0.00359162	0.00283067	0.00699274	0.0138931	0.00786762	0.0114763	0.0108784	0.00911091	0.0120401	0.011953	0.00841151	0.00923723	0.00754037	0.00910549	0.0102539	0.0103885	0.00767844	0.00841824	0.0107468	0.00990099	0.00721471	0.00932766	0.00401508	0.0103656	0.0046338	0.0036344	0.00315908	0.00747902	0.00661483	0.00628598	0.00246896	0.0124835	0.00436529	0.00717923	0.00468176	0.0025665	0.00751759	0.00526877	0.00522346	0.0081482
			EG	0.0116109	0.0081495	0	0.0117957	0.0136148	0.0140293	0.00664713	0.00610975	0.010231	0.0170464	0.0107682	0.0146251	0.0139645	0.012224	0.0149994	0.0150628	0.0115722	0.0121783	0.0106867	0.0121851	0.0134369	0.0134979	0.0107348	0.0115008	0.0136879	0.0128421	0.0102956	0.0122687	0.00703364	0.0133067	0.00767309	0.00669185	0.00617657	0.0105061	0.00950864	0.00930668	0.00550445	0.0155263	0.00735014	0.0103435	0.0076206	0.00561674	0.0103725	0.00813988	0.008236	0.0111162
			GQ	0.0117988	0.00793235	0.0117845	0	0.0139237	0.01417	0.00677903	0.00592731	0.0100118	0.0170396	0.0110354	0.0148177	0.0142146	0.0124861	0.015327	0.0152866	0.0118415	0.0122516	0.0109543	0.0124321	0.0136364	0.0137513	0.0109992	0.0117676	0.0137612	0.0129153	0.010557	0.012342	0.00718187	0.0133799	0.00782287	0.00684298	0.00632472	0.010655	0.00980464	0.00945507	0.00565394	0.0156763	0.00749905	0.0106135	0.00783147	0.00576734	0.0107066	0.00847556	0.00838379	0.0114533
			LY	0.0133969	0.0100127	0.0132511	0.013652	0	0.0158229	0.00856786	0.00800878	0.0120854	0.0189925	0.0125381	0.016621	0.0159358	0.0142157	0.0169107	0.0170422	0.013596	0.0139637	0.0127009	0.0141515	0.0154565	0.0154849	0.012691	0.0134742	0.0154732	0.0146274	0.0122666	0.0140541	0.00884836	0.015092	0.00950015	0.00852972	0.00799065	0.0123259	0.011305	0.0111227	0.00732924	0.0173555	0.00914555	0.0123698	0.00940457	0.00745033	0.0121823	0.00995716	0.0100471	0.0130355
			MA	0.0136235	0.01018	0.0136386	0.0138182	0.0157683	0	0.00897393	0.00817623	0.0122521	0.0193217	0.0128739	0.0170471	0.0163554	0.0146406	0.0173142	0.0174639	0.0140296	0.0142431	0.013132	0.0145697	0.015889	0.0159086	0.0131065	0.0138943	0.0157527	0.0149068	0.012686	0.0143335	0.00902957	0.0153714	0.00968188	0.00871188	0.00817183	0.0125074	0.0116543	0.0113039	0.00751087	0.0175373	0.00932623	0.0128041	0.00966099	0.00763232	0.0125559	0.0103337	0.0102282	0.0134412
			MZ	0.00749434	0.00378366	0.00735731	0.00745783	0.00953854	0.00989514	0	0.00170743	0.00589942	0.0127169	0.00667586	0.0102113	0.00960981	0.00782583	0.0107829	0.0106861	0.00710513	0.00811337	0.00624015	0.00784102	0.00897278	0.00910956	0.00641255	0.00714155	0.00962295	0.00877713	0.00594166	0.0082038	0.00285017	0.00924173	0.00346081	0.00245434	0.00199459	0.00631078	0.00540894	0.00512023	0.00129746	0.0113091	0.00321173	0.00587115	0.00350888	0.00138924	0.00630346	0.00404807	0.0040609	0.00688362
			NA	0.00688453	0.00317057	0.0067764	0.00684066	0.00894708	0.00927792	0.00181211	0	0.00528195	0.0121363	0.00607773	0.0096116	0.00901647	0.00722746	0.0102055	0.0100925	0.00649773	0.00754102	0.00563549	0.00724889	0.00836636	0.0085118	0.00582509	0.00654909	0.00905059	0.00820477	0.00534945	0.00763144	0.00222557	0.00866938	0.00283165	0.00182118	0.00137023	0.0056843	0.00481241	0.00449517	0.000669142	0.0106791	0.00259456	0.00526308	0.00290209	0.000757672	0.00571564	0.00345671	0.00343762	0.00630355
			NG	0.010456	0.00663817	0.0104165	0.0102817	0.0125637	0.0128335	0.00543215	0.0046185	0	0.0157099	0.00968062	0.0134062	0.0128052	0.0110604	0.0139383	0.0138783	0.0103928	0.0109701	0.00951229	0.0110268	0.0122076	0.0123308	0.00959632	0.0103527	0.0124796	0.0116338	0.00914507	0.0110605	0.0058275	0.0120984	0.00645891	0.00547063	0.00497084	0.00929667	0.00844041	0.00809971	0.00429174	0.0143107	0.0061589	0.00916296	0.00648449	0.00439831	0.00934271	0.00710402	0.00703219	0.010057
			ZA	0.016624	0.0125361	0.016332	0.0162668	0.0185901	0.0189722	0.0110251	0.0103608	0.0147122	0	0.0157652	0.0192754	0.0186541	0.0169731	0.0196945	0.0197229	0.0163952	0.0166057	0.0154885	0.0168599	0.0181447	0.0182234	0.0154131	0.0162188	0.0181153	0.0172694	0.0150039	0.0166961	0.0120501	0.017734	0.0127275	0.0117796	0.0111911	0.0155383	0.0145158	0.0143271	0.0105519	0.0205873	0.0123131	0.0151724	0.0126441	0.0106912	0.015338	0.0131362	0.0132415	0.0158429
			TN	0.0109827	0.00749148	0.0108824	0.0111403	0.0130243	0.0133981	0.00611138	0.00546697	0.00957635	0.0165046	0	0.0140714	0.0134167	0.0116714	0.0144659	0.014513	0.011012	0.0116066	0.0101287	0.0116384	0.0128777	0.0129463	0.0101906	0.0109525	0.0131162	0.0122704	0.00974788	0.011697	0.00639437	0.012735	0.00702906	0.00604364	0.00553755	0.0098649	0.00891019	0.00866692	0.00486129	0.0148815	0.00671831	0.00978272	0.00699371	0.0049702	0.00981041	0.00757292	0.00759811	0.0105808
		Asia-Pacific	AU	0.0145846	0.0108391	0.0143104	0.014562	0.0165529	0.0170186	0.00923562	0.00867742	0.0130069	0.0195895	0.0137204	0	0.0161205	0.0143755	0.0175476	0.0171443	0.0136881	0.0145051	0.01282	0.0143611	0.0154113	0.0156051	0.0129399	0.0137104	0.0160146	0.0151688	0.0124946	0.0145955	0.0100669	0.0156334	0.0107321	0.00977351	0.00920852	0.01355	0.0124674	0.0123426	0.00855875	0.0185898	0.0103433	0.0124861	0.01059	0.00868943	0.0133042	0.0110917	0.0112618	0.0137366
			BN	0.0139525	0.0102923	0.0136922	0.0140114	0.0159285	0.0163831	0.00866908	0.00813735	0.012456	0.0190486	0.0130929	0.0162144	0	0.0137813	0.0169451	0.0166303	0.0131309	0.0140165	0.0122414	0.013742	0.0150237	0.015029	0.0123455	0.013089	0.0155261	0.0146802	0.0118629	0.0141069	0.00942192	0.0151449	0.0100816	0.00911804	0.00856381	0.0129027	0.0118385	0.011697	0.0079092	0.0179382	0.00970694	0.0119047	0.00995884	0.0080359	0.0126812	0.0104643	0.0106184	0.0131259
			CN	0.0124063	0.00874745	0.0121742	0.0124565	0.0143979	0.01483	0.00716641	0.00661022	0.0109004	0.0175439	0.0115561	0.0147401	0.0140744	0	0.0154624	0.0151805	0.0115672	0.0125408	0.0106801	0.0123199	0.013533	0.013536	0.0109045	0.0116261	0.0140504	0.0132046	0.0103926	0.0126313	0.0078497	0.0136692	0.00849815	0.00752482	0.00699217	0.0113259	0.0102988	0.0101237	0.00632785	0.0163529	0.00815222	0.0103344	0.00841448	0.00644657	0.0111534	0.00892764	0.00904946	0.0116264
			IN	0.0147634	0.0112412	0.0144924	0.014966	0.0167334	0.0171965	0.00953253	0.00907638	0.013411	0.0199654	0.0139002	0.0174676	0.016774	0.0150595	0	0.0178838	0.0144487	0.0150003	0.013551	0.0149882	0.0163098	0.0163275	0.0135249	0.014313	0.0165099	0.015664	0.0131047	0.0150907	0.0102425	0.0161286	0.0109062	0.00994633	0.00938414	0.013725	0.0126469	0.012518	0.00873313	0.0187636	0.010521	0.0132232	0.010769	0.00886276	0.0134851	0.0112715	0.0114378	0.0138785
			ID	0.0149509	0.0112536	0.0146709	0.0149792	0.016916	0.0173862	0.00960313	0.00908714	0.0134243	0.0199839	0.0140847	0.0170652	0.0164516	0.0147243	0.0179006	0	0.0140661	0.0149014	0.013195	0.0146956	0.015893	0.0159496	0.0132729	0.0140468	0.016411	0.0155651	0.0128305	0.0149918	0.0104384	0.0160297	0.0111058	0.0101492	0.00957985	0.0139224	0.0128323	0.0127143	0.00893203	0.0189638	0.0107112	0.0128631	0.0109559	0.0090643	0.0136667	0.0114559	0.0116326	0.014093
			JP	0.0118242	0.0081627	0.0116017	0.0118683	0.0138211	0.0142457	0.00659911	0.0060315	0.010312	0.0169728	0.0109772	0.0141478	0.0135183	0.0116848	0.0149019	0.0146093	0	0.0119339	0.0100333	0.0117684	0.0129189	0.0129769	0.0103587	0.0110775	0.0134435	0.0125976	0.00985248	0.0120243	0.00725894	0.0130623	0.00790364	0.00692704	0.0064016	0.0107336	0.009719	0.00953252	0.00573403	0.0157578	0.00756734	0.00967238	0.00783308	0.00585009	0.0105776	0.00834885	0.00845979	0.0110602
			KZ	0.0121519	0.00845809	0.0120358	0.012125	0.0142077	0.0145476	0.00709094	0.00639469	0.010566	0.0174216	0.0113404	0.0148663	0.0142719	0.0124768	0.0154687	0.0153484	0.0117385	0	0.0108788	0.0125059	0.0136146	0.0137631	0.011083	0.0118025	0.0143461	0.0135003	0.010604	0.0129269	0.00748834	0.0139649	0.00809064	0.00707686	0.00663318	0.0109455	0.0100713	0.00975754	0.00592882	0.0159375	0.00786293	0.0105032	0.00816778	0.00601467	0.0109747	0.00871273	0.00870148	0.0115639
			KR	0.0110125	0.00734641	0.0108063	0.0110461	0.0130184	0.0134301	0.00581244	0.00522555	0.00948939	0.0161799	0.010171	0.0134098	0.0127721	0.0109413	0.0141266	0.0138728	0.010178	0.0112272	0	0.011021	0.0121875	0.0122373	0.00960677	0.0103253	0.0127367	0.0118909	0.00910421	0.0113176	0.00643226	0.0123555	0.00707048	0.0060882	0.00557525	0.00990424	0.00891108	0.00870517	0.00490206	0.0149235	0.00675076	0.00893552	0.00702247	0.00501351	0.00977646	0.00754269	0.00763498	0.0102753
			MY	0.0123566	0.0086871	0.0121269	0.0123951	0.0143495	0.0147798	0.00712032	0.00655162	0.010839	0.0174875	0.0115072	0.0147326	0.0140446	0.0123152	0.0154179	0.0151643	0.0116532	0.0125647	0.0107713	0	0.0135392	0.0135775	0.010863	0.0116094	0.0140743	0.0132285	0.0103943	0.0126551	0.00779776	0.0136931	0.00844523	0.00747104	0.00694027	0.0112736	0.0102497	0.0100716	0.00627511	0.0162998	0.00810179	0.0104264	0.00836492	0.00639313	0.0111052	0.00887874	0.0089978	0.0115806
			PG	0.0135331	0.00979767	0.0132775	0.0135141	0.0155117	0.0159625	0.00822024	0.00764749	0.0119585	0.018573	0.0126751	0.0156163	0.015123	0.013367	0.0165379	0.0161628	0.0126503	0.0134761	0.0117987	0.0133743	0	0.0146037	0.0119523	0.0127165	0.0149857	0.0141399	0.0114939	0.0135665	0.00899822	0.0146045	0.00965606	0.00869098	0.00814021	0.0124783	0.0114202	0.0112732	0.00748404	0.0175124	0.00928611	0.0114595	0.00953971	0.00760946	0.0122648	0.0100464	0.0101953	0.0127161
			PH	0.013553	0.00989135	0.0132992	0.0136081	0.0155326	0.015982	0.00827966	0.00774053	0.0120526	0.018657	0.0126956	0.0157804	0.0151144	0.0133203	0.0165604	0.0162115	0.0126563	0.0135982	0.0117715	0.0133699	0.0145811	0	0.0119697	0.0126909	0.0151078	0.0142619	0.0114583	0.0136886	0.0090164	0.0147266	0.00967347	0.0087077	0.00815843	0.0124962	0.0114405	0.0112913	0.00750159	0.0175297	0.00930546	0.0114317	0.00955975	0.00762646	0.0122859	0.010067	0.0102137	0.0127372
			SG	0.0110618	0.00740302	0.0108571	0.0111022	0.0130685	0.0134789	0.00586409	0.00528301	0.00954545	0.0162353	0.0102207	0.0135346	0.0128819	0.0111281	0.0141793	0.0139762	0.0104557	0.011395	0.00957578	0.0111052	0.0123285	0.0124046	0	0.0104164	0.0129046	0.0120588	0.00921279	0.0114854	0.00647994	0.0125234	0.00711748	0.00613457	0.00562297	0.00995164	0.00896069	0.00875278	0.00494918	0.0149704	0.0067995	0.00922505	0.00707181	0.00506012	0.00982675	0.00759248	0.00768287	0.0103271
			TH	0.0117475	0.00809276	0.011529	0.0117969	0.0137466	0.014168	0.00652854	0.00596397	0.0102406	0.0169061	0.0109019	0.0141748	0.0134974	0.0117341	0.0148341	0.0146112	0.011068	0.0119865	0.0101849	0.0117263	0.0129754	0.0130086	0.0102959	0	0.0134961	0.0126503	0.00980825	0.0120769	0.00717841	0.0131149	0.00782144	0.00684337	0.00632116	0.0106524	0.00964321	0.00945182	0.00565214	0.0156753	0.00748938	0.00983685	0.00775662	0.005767	0.0105035	0.0082735	0.00837974	0.0109901
			TM	0.0133928	0.00969903	0.0132768	0.0133659	0.0154486	0.0157885	0.00833189	0.00763563	0.011807	0.0186626	0.0125813	0.0161072	0.0155129	0.0137178	0.0167096	0.0165893	0.0129794	0.0140775	0.0121197	0.0137468	0.0148555	0.015004	0.0123239	0.0130435	0	0.0147412	0.0118449	0.0141679	0.00872928	0.0152058	0.00933159	0.00831781	0.00787413	0.0121865	0.0113123	0.0109985	0.00716977	0.0171784	0.00910387	0.0117441	0.00940873	0.00725561	0.0122156	0.00995368	0.00994243	0.0128049
			UZ	0.0126975	0.00900372	0.0125815	0.0126706	0.0147533	0.0150932	0.00763658	0.00694032	0.0111117	0.0179672	0.011886	0.0154119	0.0148176	0.0130225	0.0160143	0.015894	0.0122841	0.0133821	0.0114244	0.0130515	0.0141602	0.0143087	0.0116286	0.0123481	0.0148917	0	0.0111496	0.0134726	0.00803397	0.0145105	0.00863628	0.0076225	0.00717882	0.0114911	0.0106169	0.0103032	0.00647446	0.0164831	0.00840857	0.0110488	0.00871342	0.0065603	0.0115203	0.00925837	0.00924712	0.0121095
			VN	0.0106681	0.00700184	0.0104702	0.0106985	0.0126786	0.0130836	0.00548093	0.0048863	0.00914156	0.0158473	0.00982931	0.0131488	0.0124814	0.0107023	0.013801	0.0135945	0.0100255	0.0110013	0.00914719	0.0107151	0.0119333	0.0119837	0.00929347	0.0100107	0.0125108	0.011665	0	0.0110917	0.00607997	0.0121296	0.0067148	0.00572953	0.00522314	0.00955055	0.00856857	0.00835253	0.00454701	0.0145672	0.00640375	0.00879352	0.00667856	0.00465602	0.0094375	0.0072011	0.00728368	0.00994476
		Europe	AZ	0.0122262	0.00853242	0.0121102	0.0121993	0.014282	0.0146219	0.00716527	0.00646902	0.0106404	0.0174959	0.0114147	0.0149406	0.0143463	0.0125512	0.015543	0.0154227	0.0118128	0.0129108	0.0109531	0.0125802	0.0136889	0.0138374	0.0111573	0.0118768	0.0144204	0.0135746	0.0106783	0	0.00756267	0.0140392	0.00816498	0.00715119	0.00670752	0.0110198	0.0101456	0.00983187	0.00600316	0.0160118	0.00793726	0.0105775	0.00824211	0.006089	0.011049	0.00878706	0.00877581	0.0116382
			BE	0.00778468	0.00414182	0.00769468	0.0078031	0.00985816	0.0101772	0.00280544	0.00209029	0.00624265	0.0131408	0.00698548	0.01064	0.0100263	0.00824714	0.0111757	0.0111091	0.00753414	0.00844005	0.00666686	0.0082563	0.00940688	0.00952976	0.00682541	0.00755851	0.00994963	0.0091038	0.00635803	0.00853047	0	0.00956841	0.00371048	0.00270495	0.00224421	0.00655955	0.00572623	0.00536873	0.0015469	0.0115589	0.00348842	0.00630076	0.00380488	0.00163948	0.00662923	0.0043752	0.00431823	0.00727726
			CZ	0.0130794	0.00938565	0.0129634	0.0130525	0.0151352	0.0154751	0.00801851	0.00732225	0.0114936	0.0183492	0.0122679	0.0157938	0.0151995	0.0134044	0.0163962	0.0162759	0.0126661	0.0137641	0.0118063	0.0134334	0.0145421	0.0146906	0.0120105	0.0127301	0.0152737	0.0144278	0.0115315	0.0138545	0.0084159	0	0.00901821	0.00800443	0.00756075	0.0118731	0.0109989	0.0106851	0.00685639	0.0168651	0.0087905	0.0114307	0.00909535	0.00694223	0.0119022	0.0096403	0.00962905	0.0124915
			DK	0.00830339	0.00467956	0.00822311	0.00833875	0.0103835	0.0106947	0.0033547	0.00263247	0.00677773	0.0136918	0.00750878	0.0112114	0.0105905	0.00881733	0.0117222	0.0116757	0.00811384	0.00893518	0.00724373	0.00881903	0.00998533	0.0100986	0.00738514	0.00812333	0.0104448	0.00959893	0.00692212	0.0090256	0.00360908	0.0100635	0	0.0031987	0.00275476	0.00706259	0.0062532	0.00587741	0.00204126	0.0120498	0.0040044	0.00688119	0.00432519	0.00213214	0.00715606	0.00490498	0.00483094	0.0078261
			FI	0.00745316	0.00379897	0.00735736	0.00746149	0.0095227	0.0098464	0.00245575	0.0017448	0.00590138	0.0127901	0.00665122	0.0102772	0.00966776	0.0078851	0.0108277	0.0107492	0.00716651	0.0081018	0.0063009	0.00789865	0.00903998	0.00916852	0.00646954	0.00719963	0.00961138	0.00876555	0.00599959	0.00819222	0.00277222	0.00923016	0.00336889	0	0.00191754	0.00622732	0.00538979	0.00504093	0.00120786	0.0112138	0.00315854	0.0059327	0.00347241	0.00128762	0.00629287	0.00403707	0.0039903	0.00692783
			FR	0.00706669	0.00339816	0.00696357	0.00706226	0.00913127	0.00946084	0.00204627	0.00134065	0.00550258	0.0123793	0.0062613	0.00985094	0.009247	0.00745982	0.0104203	0.0103266	0.00673405	0.00773707	0.00587058	0.007479	0.00860847	0.00874427	0.00605215	0.00677841	0.00924665	0.00840083	0.00557891	0.0078275	0.00239261	0.00886543	0.00299959	0.00198991	0	0.00585171	0.00499711	0.00466229	0.000836916	0.0108472	0.00277414	0.00549968	0.00308474	0.000926091	0.00590029	0.00364227	0.00360838	0.00651867
			DE	0.0106985	0.00716024	0.0106619	0.0108101	0.0128083	0.0130845	0.00588709	0.00513311	0.00924644	0.0162321	0.00992454	0.0138434	0.0131898	0.0114435	0.0142421	0.0142857	0.0107826	0.011282	0.00989981	0.0114118	0.0126485	0.0127187	0.00996447	0.0107255	0.0127916	0.0119458	0.00952102	0.0113724	0.00596574	0.0124104	0.00657744	0.00558863	0.0051132	0	0.00868545	0.00823346	0.00441033	0.0144292	0.00638718	0.00955323	0.00672749	0.00451653	0.00958771	0.00734992	0.00719902	0.0103566
			IT	0.00994959	0.00641414	0.00982818	0.0100669	0.0119887	0.0123607	0.00501793	0.00438116	0.00850404	0.015397	0.00912029	0.0129363	0.0122952	0.0105386	0.0133777	0.013387	0.00986141	0.0105634	0.00898348	0.0105197	0.0117295	0.0118161	0.00907746	0.00982977	0.012073	0.0112271	0.00862655	0.0106538	0.0053448	0.0116917	0.00597243	0.00498082	0.00448834	0.00881241	0	0.00761662	0.00380596	0.0138236	0.00567979	0.00863078	0.00596032	0.00390983	0.00875574	0.00651274	0.00655059	0.00948814
			NL	0.00969158	0.00611697	0.00963646	0.00977077	0.0117887	0.0120798	0.00482183	0.00408136	0.00820826	0.0151635	0.00890885	0.0127358	0.0120961	0.0103384	0.0131822	0.0131874	0.00965933	0.0103054	0.00878194	0.0103209	0.0115276	0.0116161	0.00887925	0.00963056	0.011815	0.0109692	0.00842748	0.0103959	0.00497515	0.0114338	0.00559616	0.00460166	0.00412186	0.00843785	0.00766276	0	0.00343006	0.0134468	0.0053855	0.00842856	0.00571752	0.00353182	0.00856528	0.00632184	0.00620359	0.00929213
			NO	0.00647641	0.00278682	0.00636253	0.00645322	0.00853368	0.00887187	0.00142219	0.00072439	0.00489418	0.0117532	0.00566593	0.00920237	0.00860645	0.00681265	0.00979932	0.00968342	0.00607641	0.00715806	0.00521606	0.00684006	0.0079522	0.00809861	0.00541652	0.00613716	0.00866763	0.00782181	0.00493846	0.00724848	0.00181106	0.00828642	0.00241301	0.00139988	0.000955959	0.00526801	0.00439768	0.0040802	0	0.01026	0.00218689	0.00484124	0.00249269	0.000337421	0.00530101	0.00303972	0.00302473	0.00589506
			PL	0.0149443	0.0115599	0.0149863	0.0151928	0.0171074	0.0173206	0.0103798	0.00956864	0.0136245	0.020739	0.0142074	0.0185153	0.0178031	0.0161052	0.0187123	0.0189183	0.0155209	0.0153857	0.0146153	0.0160133	0.0173768	0.0173693	0.0145417	0.0153438	0.0168952	0.0160494	0.0141335	0.0154761	0.0101446	0.016514	0.0107002	0.00971274	0.00929311	0.0135856	0.012998	0.0124099	0.00854717	0	0.0106108	0.0142975	0.0109862	0.00863133	0.0138992	0.0116853	0.0113963	0.0148458
			PT	0.00808049	0.00444851	0.00799554	0.00810873	0.0101574	0.0104725	0.00311709	0.00239928	0.00654797	0.0134544	0.00728368	0.010963	0.0103456	0.00856956	0.011486	0.0114297	0.00786142	0.00874798	0.0069927	0.00857489	0.00973353	0.00985148	0.00714246	0.00787817	0.0102576	0.00941174	0.00667732	0.00883841	0.00342661	0.00987634	0.00404068	0.0030372	0.00257085	0.00688863	0.00602634	0.00569703	0.0018767	0.0118895	0	0.00662841	0.00410152	0.00197091	0.00692927	0.00467677	0.00463634	0.0075887
			RU	0.0106945	0.00702645	0.0104939	0.0107241	0.0127035	0.0131107	0.00550319	0.00490921	0.00916722	0.0158681	0.00985483	0.0131114	0.0124769	0.0106482	0.0138214	0.0135757	0.00987729	0.0109184	0.00899928	0.0107246	0.0118872	0.0119436	0.00931032	0.0100284	0.012428	0.0115821	0.00880882	0.0110088	0.00610901	0.0120468	0.00674499	0.00576074	0.00525212	0.00958006	0.00859437	0.00838169	0.00457698	0.0145976	0.00643103	0	0.00670482	0.00468682	0.00946215	0.0072266	0.00731239	0.00996672
			ES	0.00833034	0.00472109	0.00824016	0.00838031	0.0104007	0.0107332	0.00337048	0.00267415	0.00681927	0.0137282	0.00752635	0.0112257	0.0106052	0.00883169	0.0117382	0.0116903	0.00812751	0.00899859	0.00725761	0.00883391	0.0099991	0.010113	0.00740023	0.00813807	0.0105082	0.00966234	0.00693692	0.00908901	0.00369741	0.0101269	0.00431343	0.00331166	0.00284155	0.00716024	0.00626985	0.00596803	0.0021491	0.0121626	0.00405055	0.00689481	0	0.0022447	0.00717321	0.00492183	0.00490658	0.0078419
			SE	0.00654977	0.00286285	0.00643725	0.00652896	0.00860797	0.00894507	0.00149984	0.000801046	0.00496984	0.0118311	0.00573994	0.00928313	0.00868619	0.00689323	0.00987658	0.0097635	0.00615832	0.00722862	0.00529758	0.0069196	0.00803394	0.008179	0.00549564	0.00621699	0.0087382	0.00789238	0.00501819	0.00731905	0.00188325	0.00835698	0.00248458	0.00147031	0.00102818	0.00534006	0.0044722	0.00415237	0.000322901	0.0103311	0.00225987	0.00492326	0.00256628	0	0.00537552	0.00311464	0.00309725	0.00597265
			TR	0.010706	0.00720396	0.0105518	0.0108537	0.0127267	0.0131204	0.00576752	0.00517738	0.00929006	0.0161559	0.00987116	0.0137133	0.0130632	0.0113141	0.0141238	0.014158	0.0106486	0.011306	0.00976715	0.0112859	0.0125151	0.0125899	0.00984001	0.0105986	0.0128156	0.0119697	0.00939449	0.0113964	0.00611365	0.0124343	0.00674661	0.00575968	0.00525692	0.00958347	0.00860642	0.00838602	0.00457916	0.0145987	0.00644031	0.00941883	0.00671678	0.00468683	0	0.00722952	0.0073179	0.0102372
			UA	0.00882264	0.00523828	0.00868581	0.00889541	0.0108584	0.0112292	0.00383246	0.00319587	0.00733378	0.014196	0.00799785	0.011705	0.0110789	0.00930999	0.012198	0.0121658	0.00861319	0.00944656	0.00774109	0.0093064	0.0104838	0.0105903	0.00787038	0.00861219	0.0109561	0.0101103	0.00741047	0.00953699	0.00419983	0.0105749	0.0048196	0.00382112	0.00334378	0.00766421	0.00673128	0.00647084	0.00265458	0.0126694	0.00454711	0.00738106	0.00483564	0.00275286	0.00761139	0	0.00540791	0.00830355
			GB	0.00879803	0.00519121	0.00872645	0.00884855	0.010884	0.0111883	0.00387661	0.00314809	0.007287	0.0142153	0.00800753	0.011753	0.0111256	0.0093578	0.0122416	0.012213	0.00866272	0.00943732	0.0077901	0.0093529	0.0105331	0.0106379	0.00791634	0.00865905	0.0109469	0.0101011	0.0074572	0.00952774	0.00411179	0.0105657	0.00473042	0.00373092	0.00325587	0.00757569	0.00675523	0.00638268	0.0025656	0.0125801	0.00449659	0.00743072	0.00482127	0.00266306	0.00765798	0.00540954	0	0.00834763
		Middle East	IR	0.0113935	0.00780932	0.0111843	0.0115111	0.0133977	0.0138117	0.00623512	0.00568474	0.00995454	0.0166285	0.010551	0.0141408	0.0134858	0.01174	0.0145125	0.0145826	0.0110795	0.0117904	0.0101966	0.0117077	0.0129467	0.013015	0.0102602	0.0110216	0.0132999	0.0124541	0.00981704	0.0118808	0.00681576	0.0129187	0.00745504	0.00647367	0.0059587	0.0102882	0.00929136	0.00908878	0.00528643	0.0153082	0.00713256	0.00985021	0.00740322	0.00539861	0.0101555	0.00792266	0.00801817	0
			IQ	0.0151548	0.0116525	0.014876	0.0153803	0.0171206	0.0175899	0.00992367	0.00948224	0.0138256	0.0203639	0.0142891	0.0179267	0.0172265	0.0155173	0.0181262	0.0183385	0.0149151	0.0153391	0.0140149	0.0154394	0.0167756	0.0167841	0.0139734	0.014766	0.0168487	0.0160029	0.013557	0.0154295	0.0106412	0.0164675	0.0113081	0.0103509	0.00978267	0.014125	0.0130366	0.012917	0.00913437	0.019166	0.0109148	0.0136903	0.0111599	0.00926622	0.0138714	0.0116603	0.0118356	0.0141136
			IL	0.011364	0.00789198	0.0111602	0.0115391	0.0133709	0.0137814	0.00639756	0.00585297	0.00997467	0.0167937	0.0105231	0.0143663	0.0137088	0.0119658	0.014751	0.014806	0.0113101	0.0119322	0.0104257	0.0119299	0.0131753	0.0132402	0.0104809	0.0112448	0.0134418	0.0125959	0.0100399	0.0120226	0.00678285	0.0130605	0.00742059	0.00643785	0.00592587	0.0102546	0.00926197	0.00905571	0.00525226	0.0152735	0.00710202	0.0100811	0.00737396	0.00536334	0.0101265	0.00789246	0.00798571	0.0108668
			KW	0.0114437	0.00786057	0.0112336	0.0115627	0.0134475	0.0138621	0.0062844	0.00573541	0.0100061	0.0166784	0.0106009	0.0141913	0.0135358	0.0117904	0.0145608	0.0146328	0.0111307	0.0118399	0.0102475	0.0117576	0.0129977	0.0130653	0.0103098	0.0110715	0.0133495	0.0125037	0.00986697	0.0119304	0.00686678	0.0129683	0.00750641	0.00652534	0.0060097	0.0103393	0.00934136	0.00913984	0.00533774	0.0153597	0.00718303	0.00990142	0.00745337	0.00545017	0.0102051	0.00797256	0.00806909	0.0105957
			OM	0.0107486	0.00714959	0.010552	0.0108466	0.0127598	0.0131638	0.00560339	0.0050333	0.00928976	0.0159883	0.00991025	0.013492	0.0128452	0.0110927	0.0138974	0.0139393	0.0104218	0.0112162	0.00954196	0.0110687	0.0122899	0.0123693	0.0096245	0.0103802	0.0127257	0.0118799	0.00917653	0.0113066	0.00615925	0.0123445	0.00679353	0.00580776	0.00530245	0.00962961	0.00864938	0.00843176	0.00462583	0.0146459	0.00648387	0.0091916	0.00675916	0.00473445	0.00951883	0.00728204	0.00736312	0.00999542
			QA	0.010758	0.00715974	0.0105608	0.010857	0.0127689	0.0131734	0.0056122	0.00504305	0.00930016	0.0159975	0.00991949	0.0135011	0.0128539	0.0111017	0.0139025	0.0139481	0.0104313	0.0112032	0.00955134	0.0110774	0.0122996	0.0123782	0.009633	0.010389	0.0127127	0.0118669	0.00918526	0.0112936	0.00616925	0.0123315	0.00680377	0.00581821	0.00531243	0.0096397	0.00865867	0.00844178	0.00463603	0.0146561	0.00649349	0.00920117	0.00676856	0.00474482	0.00952788	0.00729128	0.00737304	0.00996692
			SA	0.0131381	0.00974616	0.0129003	0.0133861	0.0151266	0.0155633	0.00812177	0.00762696	0.0118197	0.0185394	0.0122861	0.016154	0.0154757	0.0137499	0.0164672	0.0165798	0.0131212	0.0136326	0.0122288	0.0136927	0.0149829	0.0150204	0.0122351	0.0130135	0.0151422	0.0142964	0.0118066	0.013723	0.00858663	0.014761	0.00923718	0.00826566	0.00772898	0.0120637	0.0110294	0.0108608	0.0070665	0.0170923	0.00888577	0.0118943	0.00914597	0.0071867	0.0118815	0.00965758	0.00978577	0.0125898
			AE	0.0111365	0.00754643	0.0109323	0.0112463	0.0131435	0.0135535	0.00598339	0.00542515	0.00968963	0.0163734	0.0102956	0.0138821	0.0132303	0.0114818	0.0142662	0.0143261	0.0108172	0.0115617	0.00993552	0.0114529	0.0126848	0.0127575	0.0100067	0.0107658	0.0130713	0.0122254	0.0095616	0.0116521	0.00655415	0.01269	0.00719143	0.00620831	0.00569719	0.0100257	0.00903554	0.00882696	0.00502319	0.0150443	0.00687407	0.00958754	0.00714657	0.00513395	0.00990181	0.00766738	0.00775714	0.0103327
		North America	CA	0.00767822	0.00401896	0.00758655	0.00768081	0.00975058	0.0100699	0.00269378	0.00196647	0.00612048	0.013015	0.00687824	0.0105246	0.00991211	0.00813199	0.0110646	0.0109945	0.00738632	0.00832137	0.00653299	0.00814239	0.00927018	0.00941484	0.006712	0.00744425	0.00983094	0.00898512	0.00624389	0.00841179	0.0030112	0.00944973	0.0036177	0.0026118	0.00215565	0.00647085	0.00561836	0.00528134	0.00145366	0.0114661	0.00338289	0.00615166	0.00369816	0.00154648	0.00652139	0.00426685	0.00421959	0.00716568
			MX	0.0101377	0.00651067	0.0100935	0.0101634	0.0122422	0.0125208	0.00526872	0.00446733	0.0086004	0.0155456	0.0093601	0.0131094	0.0125412	0.0107181	0.0136596	0.0136181	0.00990556	0.0106038	0.0090632	0.0107909	0.0118028	0.0120093	0.00937194	0.0101034	0.0121134	0.0112676	0.00887139	0.0106942	0.00547352	0.0117322	0.00609052	0.0051001	0.00461719	0.00894032	0.00811812	0.00774549	0.00392212	0.0139419	0.00583052	0.00867203	0.00616542	0.00402864	0.00902048	0.00678037	0.00667328	0.00977229
			TT	0.0110866	0.00743895	0.0110589	0.0110906	0.0132024	0.013464	0.00622017	0.00539668	0.00952675	0.0164858	0.0103168	0.0141838	0.01362	0.011792	0.0146557	0.0146995	0.0109601	0.0115693	0.0101223	0.0118406	0.0128628	0.0130846	0.0103905	0.0111563	0.0130789	0.0122331	0.00995112	0.0116598	0.00644065	0.0126977	0.00707119	0.00608652	0.00558378	0.00991155	0.00908108	0.00871329	0.00490117	0.0149237	0.00677978	0.00972704	0.00711702	0.00501278	0.00998321	0.00774813	0.00764071	0.0107724
			US	0.0109642	0.00735287	0.0109356	0.0110025	0.0130793	0.0133445	0.00614254	0.00531643	0.00943858	0.0164076	0.0101939	0.0140002	0.0134379	0.0116085	0.0145307	0.0145149	0.0107795	0.0113868	0.00994103	0.011691	0.0126814	0.0129009	0.0102643	0.011007	0.0128963	0.0120505	0.00976761	0.0114772	0.00629979	0.0125151	0.00692	0.00593466	0.0054432	0.00976869	0.00895785	0.00857236	0.00475016	0.0147724	0.00665297	0.00954642	0.00699446	0.00486118	0.00986	0.00762463	0.00749664	0.0106472
		South America	AR	0.0100057	0.00625887	0.00995952	0.00993368	0.0121089	0.0123863	0.00494149	0.00417465	0.00837325	0.0152248	0.00922718	0.0128571	0.0122945	0.0105444	0.0134342	0.0133679	0.00978297	0.0104524	0.00894123	0.0105173	0.0115605	0.0118008	0.00908763	0.00984016	0.0119619	0.0111161	0.00863348	0.0105428	0.00537316	0.0115807	0.00600203	0.00501153	0.00451664	0.00884128	0.00798447	0.00764511	0.00383533	0.0138534	0.00570888	0.00857451	0.00603311	0.00394009	0.00888686	0.00664616	0.00657827	0.00955039
			BO	0.00941218	0.00571842	0.00929617	0.00938528	0.011468	0.0118079	0.00435127	0.00365502	0.00782637	0.0146819	0.0086007	0.0121266	0.0115323	0.00973716	0.012729	0.0126087	0.00899884	0.0100968	0.00813911	0.0097662	0.0108749	0.0110234	0.00834331	0.00906284	0.0116064	0.0107606	0.0078643	0.0101873	0.00474867	0.0112252	0.00535098	0.0043372	0.00389352	0.00820584	0.00733165	0.00701787	0.00318916	0.0131978	0.00512326	0.00776351	0.00542811	0.003275	0.00823501	0.00597307	0.00596182	0.00882424
			BR	0.00797681	0.00426453	0.00789128	0.00793272	0.0100533	0.0103659	0.00292987	0.00219752	0.00637278	0.0132395	0.00717971	0.0107843	0.0101874	0.00841229	0.0113588	0.0112625	0.00770049	0.00857923	0.00683417	0.00841638	0.00952986	0.00969224	0.00699048	0.00772469	0.0100888	0.00924299	0.00652253	0.00866966	0.00332681	0.00970759	0.00394072	0.00293709	0.00247106	0.00678877	0.00592216	0.00559721	0.00177677	0.0117896	0.00368447	0.00646905	0.00399775	0.00187087	0.0068251	0.00457242	0.00453638	0.00746333
			CL	0.00996271	0.00623741	0.0101501	0.00991644	0.0120661	0.012349	0.00511096	0.0041508	0.00835542	0.0154333	0.00918432	0.0127343	0.0122014	0.0104196	0.0134929	0.0132555	0.0096367	0.0103594	0.0088061	0.0104459	0.0114343	0.0116765	0.00901372	0.00976436	0.0118689	0.0110231	0.00855778	0.0104498	0.00530638	0.0114877	0.00592635	0.00493553	0.00445008	0.00877441	0.00794172	0.0075783	0.00375806	0.0137777	0.00565787	0.00841349	0.00599015	0.00386422	0.00884411	0.0066035	0.00650698	0.00963749
			PE	0.00893354	0.00527137	0.00909286	0.00892947	0.0110229	0.0113226	0.00407867	0.0032025	0.00736776	0.0144032	0.00814538	0.0117374	0.0111822	0.00938163	0.0124595	0.012249	0.00859411	0.00944348	0.00774652	0.00942531	0.0104503	0.0106583	0.00800513	0.00874154	0.0109531	0.0101072	0.00752734	0.0095339	0.00427509	0.0105718	0.00488985	0.00389225	0.00341912	0.00773991	0.00689497	0.00654621	0.00272346	0.0127399	0.00463339	0.00736301	0.00495758	0.00282363	0.00779765	0.00555074	0.00547939	0.008591
			VE	0.00898963	0.00532155	0.00892278	0.00897996	0.0110788	0.0113752	0.00403695	0.0032699	0.00741828	0.0143314	0.00820136	0.0119171	0.0113397	0.00952632	0.0124469	0.0124179	0.00873591	0.00956154	0.00788837	0.00956625	0.0106268	0.0108161	0.00812818	0.00887345	0.0110711	0.0102253	0.00767124	0.00965196	0.00433591	0.0106899	0.00495393	0.00395634	0.0034798	0.00780072	0.00695085	0.00660702	0.00278754	0.0128039	0.00469077	0.00750184	0.00501364	0.00288772	0.00785353	0.00560654	0.00554177	0.00855402
	Green_Renew_MDOship
		GHG [kgCO2e/kgNH3]	Destination	Africa											Asia-Pacific																Europe																		Middle East
		Origin		DZ	AO	EG	GQ	LY	MA	MZ	NA	NG	ZA	TN	AU	BN	CN	IN	ID	JP	KZ	KR	MY	PG	PH	SG	TH	TM	UZ	VN	AZ	BE	CZ	DK	FI	FR	DE	IT	NL	NO	PL	PT	RU	ES	SE	TR	UA	GB	IR
		Africa	DZ	0	0.0703407	0.0338468	0.0649123	0.0253118	0.013398	0.0882114	0.0819022	0.063391	0.104449	0.0197872	0.141807	0.124721	0.138845	0.0811816	0.13039	0.160639	0	0.154218	0.121231	0.157821	0.135658	0.114009	0.126211	0	0	0.124481	0	0.0311406	0	0.0413089	0.0501001	0.0306121	0.035352	0.0298915	0.0321974	0.0394514	0.0430383	0.0149513	0.162288	0.0124372	0.0466253	0.0294912	0.0374177	0.0281621	0.0871385
			AO	0.0703407	0	0.0972108	0.0168889	0.0886918	0.0638714	0.0663855	0.0239026	0.0176094	0.047554	0.0831513	0.133016	0.130902	0.146836	0.110165	0.129814	0.168661	0	0.162336	0.126915	0.149814	0.141855	0.124465	0.136299	0	0	0.133401	0	0.082831	0	0.0929994	0.101791	0.0823026	0.0870425	0.0932235	0.0838879	0.0911418	0.0947288	0.0674584	0.170343	0.0748244	0.0983157	0.0928552	0.100878	0.0798526	0.117868
			EG	0.0338468	0.0972108	0	0.0917824	0.0189225	0.0402681	0.0610051	0.10336	0.0902611	0.0795963	0.0248954	0.114601	0.0975151	0.111639	0.0539753	0.103184	0.133433	0	0.127011	0.0940242	0.130614	0.108452	0.0868023	0.0990043	0	0	0.0972749	0	0.0580106	0	0.068179	0.0769702	0.0574822	0.0622221	0.0276337	0.0590675	0.0663214	0.0699084	0.0418213	0.135082	0.0320693	0.0734953	0.0162163	0.0247033	0.0550322	0.0599322
			GQ	0.0649123	0.0168889	0.0917824	0	0.0832634	0.0582668	0.0758973	0.0334625	0.0086581	0.0570658	0.0777228	0.142528	0.140414	0.156347	0.119677	0.139325	0.178173	0	0.171848	0.136427	0.159326	0.151367	0.133977	0.145811	0	0	0.142912	0	0.0773385	0	0.0875068	0.0962981	0.0768101	0.08155	0.0877951	0.0783954	0.0856493	0.0892363	0.0619819	0.179855	0.069396	0.0928232	0.0874268	0.0954494	0.07436	0.12738
			LY	0.0253118	0.0886918	0.0189225	0.0832634	0	0.0317491	0.0732872	0.100253	0.0817421	0.0918784	0.0151274	0.126883	0.109797	0.123921	0.0662574	0.115466	0.145715	0	0.139293	0.106306	0.142896	0.120734	0.0990843	0.111286	0	0	0.109557	0	0.0494916	0	0.05966	0.0684512	0.0489632	0.0537031	0.0228778	0.0505485	0.0578025	0.0613894	0.0333023	0.147364	0.0235503	0.0649763	0.0172732	0.0251837	0.0465132	0.0722143
			MA	0.013398	0.0638714	0.0402681	0.0582668	0.0317491	0	0.0946327	0.0754169	0.0568577	0.0978193	0.0262085	0.148229	0.131143	0.145266	0.0876029	0.136811	0.16706	0	0.160639	0.127652	0.164242	0.14208	0.12043	0.132632	0	0	0.130902	0	0.0277778	0	0.0379461	0.0467374	0.0272494	0.0319893	0.0362808	0.0288347	0.0360886	0.0396756	0.0116526	0.16871	0.0178817	0.0432625	0.0359125	0.0439351	0.0247994	0.0935598
			MZ	0.0882114	0.0663855	0.0610051	0.0758973	0.0732872	0.0946327	0	0.0493955	0.0765378	0.025632	0.0792601	0.0914461	0.0823186	0.0964422	0.0513011	0.0820784	0.118236	0	0.111815	0.0788277	0.107908	0.0932556	0.0716058	0.0838078	0	0	0.0820784	0	0.112375	0	0.122544	0.131335	0.111847	0.116587	0.0819983	0.113432	0.120686	0.124273	0.096186	0.119885	0.086434	0.12786	0.0705809	0.0790679	0.109397	0.0586672
			NA	0.0819022	0.0239026	0.10336	0.0334625	0.100253	0.0754169	0.0493955	0	0.034071	0.0305641	0.0947128	0.116026	0.113913	0.129846	0.0931755	0.112824	0.151672	0	0.145346	0.109925	0.132824	0.124866	0.107475	0.119309	0	0	0.116411	0	0.0943765	0	0.104545	0.113336	0.093848	0.0985879	0.104785	0.0954334	0.102687	0.106274	0.0789878	0.153353	0.0863859	0.109861	0.104417	0.112439	0.091398	0.100878
			NG	0.063391	0.0176094	0.0902611	0.0086581	0.0817421	0.0568577	0.0765378	0.034071	0	0.0577064	0.0762016	0.143169	0.141055	0.156988	0.120318	0.139966	0.178814	0	0.172489	0.137068	0.159966	0.152008	0.134618	0.146451	0	0	0.143553	0	0.0758172	0	0.0859856	0.0947768	0.0752888	0.0800287	0.0862738	0.0768741	0.0841281	0.087715	0.0604606	0.180495	0.0678747	0.091302	0.0859055	0.0939281	0.0728388	0.12802
			ZA	0.104449	0.047554	0.0795963	0.0570658	0.0918784	0.0978193	0.025632	0.0305641	0.0577064	0	0.0978513	0.0956415	0.0918464	0.107779	0.069412	0.0907575	0.129605	0	0.12328	0.0878591	0.112439	0.102799	0.0844483	0.0966504	0	0	0.0943445	0	0.116779	0	0.126947	0.135738	0.11625	0.12099	0.10059	0.117836	0.12509	0.128677	0.10139	0.131287	0.105025	0.132264	0.0891722	0.0976592	0.1138	0.0771143
			TN	0.0197872	0.0831513	0.0248954	0.0777228	0.0151274	0.0262085	0.0792601	0.0947128	0.0762016	0.0978513	0	0.132856	0.11577	0.129894	0.0722303	0.121439	0.151688	0	0.145266	0.112279	0.148869	0.126707	0.105057	0.117259	0	0	0.11553	0	0.0439511	0	0.0541194	0.0629106	0.0434226	0.0481625	0.0224134	0.0450079	0.0522619	0.0558488	0.0277618	0.153337	0.0181859	0.0594358	0.0213886	0.0293151	0.0409726	0.0781872
		Asia-Pacific	AU	0.141807	0.133016	0.114601	0.142528	0.126883	0.148229	0.0914461	0.116026	0.143169	0.0956415	0.132856	0	0.0357203	0.0454563	0.0794362	0.0253598	0.0552083	0	0.053623	0.0370334	0.0255199	0.0344553	0.0373537	0.0472338	0	0	0.043903	0	0.165971	0	0.17614	0.184931	0.165443	0.170183	0.135594	0.167028	0.174282	0.177869	0.149782	0.0615335	0.14003	0.181456	0.124177	0.132664	0.162993	0.0965062
			BN	0.124721	0.130902	0.0975151	0.140414	0.109797	0.131143	0.0823186	0.113913	0.141055	0.0918464	0.11577	0.0357203	0	0.0265288	0.062078	0.0217248	0.0449119	0	0.0387308	0.0119088	0.0483707	0.018314	0.0175774	0.0227016	0	0	0.0168088	0	0.148885	0	0.159054	0.167845	0.148357	0.153097	0.118508	0.149942	0.157196	0.160783	0.132696	0.0468014	0.122944	0.16437	0.107091	0.115578	0.145907	0.079148
			CN	0.138845	0.146836	0.111639	0.156347	0.123921	0.145266	0.0964422	0.129846	0.156988	0.107779	0.129894	0.0454563	0.0265288	0	0.0762016	0.0344393	0.0335265	0	0.0262245	0.0296193	0.0570498	0.0185382	0.031621	0.0321814	0	0	0.0228137	0	0.163009	0	0.173177	0.181968	0.16248	0.16722	0.132632	0.164066	0.17132	0.174907	0.14682	0.0342151	0.137068	0.178494	0.121215	0.129701	0.16003	0.0932716
			IN	0.0811816	0.110165	0.0539753	0.119677	0.0662574	0.0876029	0.0513011	0.0931755	0.120318	0.069412	0.0722303	0.0794362	0.062078	0.0762016	0	0.0679548	0.0979955	0	0.0915742	0.0585871	0.0954654	0.0730149	0.0513652	0.0635672	0	0	0.0618378	0	0.105345	0	0.115514	0.124305	0.104817	0.109557	0.0749685	0.106402	0.113656	0.117243	0.0891562	0.0996448	0.0794042	0.12083	0.0635512	0.0720381	0.102367	0.0281461
			ID	0.13039	0.129814	0.103184	0.139325	0.115466	0.136811	0.0820784	0.112824	0.139966	0.0907575	0.121439	0.0253598	0.0217248	0.0344393	0.0679548	0	0.0491874	0	0.0471057	0.0236144	0.040156	0.0230059	0.0236624	0.0338308	0	0	0.0305321	0	0.154554	0	0.164722	0.173513	0.154025	0.158765	0.124177	0.155611	0.162865	0.166452	0.138365	0.0550482	0.128613	0.170039	0.11276	0.121247	0.151575	0.0850248
			JP	0.160639	0.168661	0.133433	0.178173	0.145715	0.16706	0.118236	0.151672	0.178814	0.129605	0.151688	0.0552083	0.0449119	0.0335265	0.0979955	0.0491874	0	0	0.0173532	0.0496838	0.0617897	0.035272	0.0535109	0.0533028	0	0	0.0455524	0	0.184803	0	0.194971	0.203762	0.184274	0.189014	0.154426	0.18586	0.193114	0.196701	0.168613	0.0218369	0.158861	0.200287	0.143008	0.151495	0.181824	0.115065
			KZ	0	0	0	0	0	0	0	0	0	0	0	0	0	0	0	0	0	0	0	0	0	0	0	0	0	0	0	0	0	0	0	0	0	0	0	0	0	0	0	0	0	0	0	0	0	0
			KR	0.154218	0.162336	0.127011	0.171848	0.139293	0.160639	0.111815	0.145346	0.172489	0.12328	0.145266	0.053623	0.0387308	0.0262245	0.0915742	0.0471057	0.0173532	0	0	0.0439191	0.0635672	0.0296673	0.0468815	0.0465452	0	0	0.0387468	0	0.178381	0	0.18855	0.197341	0.177853	0.182593	0.148005	0.179438	0.186692	0.190279	0.162192	0.0147911	0.15244	0.193866	0.136587	0.145074	0.175403	0.108644
			MY	0.121231	0.126915	0.0940242	0.136427	0.106306	0.127652	0.0788277	0.109925	0.137068	0.0878591	0.112279	0.0370334	0.0119088	0.0296193	0.0585871	0.0236144	0.0496838	0	0.0439191	0	0.0522459	0.0232141	0.0139104	0.0211804	0	0	0.0167127	0	0.145394	0	0.155563	0.164354	0.144866	0.149606	0.115017	0.146451	0.153705	0.157292	0.129205	0.0518936	0.119453	0.160879	0.1036	0.112087	0.142416	0.0756571
			PG	0.157821	0.149814	0.130614	0.159326	0.142896	0.164242	0.107908	0.132824	0.159966	0.112439	0.148869	0.0255199	0.0483707	0.0570498	0.0954654	0.040156	0.0617897	0	0.0635672	0.0522459	0	0.0460488	0.052438	0.0622701	0	0	0.0569858	0	0.181984	0	0.192153	0.200944	0.181456	0.186196	0.151607	0.183041	0.190295	0.193882	0.165795	0.0714777	0.156043	0.197469	0.14019	0.148677	0.179006	0.112599
			PH	0.135658	0.141855	0.108452	0.151367	0.120734	0.14208	0.0932556	0.124866	0.152008	0.102799	0.126707	0.0344553	0.018314	0.0185382	0.0730149	0.0230059	0.035272	0	0.0296673	0.0232141	0.0460488	0	0.0283383	0.0287066	0	0	0.0210042	0	0.159822	0	0.169991	0.178782	0.159294	0.164034	0.129445	0.160879	0.168133	0.17172	0.143633	0.0376579	0.133881	0.175307	0.118028	0.126515	0.156844	0.090085
			SG	0.114009	0.124465	0.0868023	0.133977	0.0990843	0.12043	0.0716058	0.107475	0.134618	0.0844483	0.105057	0.0373537	0.0175774	0.031621	0.0513652	0.0236624	0.0535109	0	0.0468815	0.0139104	0.052438	0.0283383	0	0.0189225	0	0	0.0171771	0	0.138172	0	0.148341	0.157132	0.137644	0.142384	0.107796	0.139229	0.146483	0.15007	0.121983	0.0550482	0.112231	0.153657	0.0963781	0.104865	0.135194	0.0684352
			TH	0.126211	0.136299	0.0990043	0.145811	0.111286	0.132632	0.0838078	0.119309	0.146451	0.0966504	0.117259	0.0472338	0.0227016	0.0321814	0.0635672	0.0338308	0.0533028	0	0.0465452	0.0211804	0.0622701	0.0287066	0.0189225	0	0	0	0.0163124	0	0.150374	0	0.160543	0.169334	0.149846	0.154586	0.119998	0.151431	0.158685	0.162272	0.134185	0.0545037	0.124433	0.165859	0.10858	0.117067	0.147396	0.0806372
			TM	0	0	0	0	0	0	0	0	0	0	0	0	0	0	0	0	0	0	0	0	0	0	0	0	0	0	0	0	0	0	0	0	0	0	0	0	0	0	0	0	0	0	0	0	0	0
			UZ	0	0	0	0	0	0	0	0	0	0	0	0	0	0	0	0	0	0	0	0	0	0	0	0	0	0	0	0	0	0	0	0	0	0	0	0	0	0	0	0	0	0	0	0	0	0
			VN	0.124481	0.133401	0.0972749	0.142912	0.109557	0.130902	0.0820784	0.116411	0.143553	0.0943445	0.11553	0.043903	0.0168088	0.0228137	0.0618378	0.0305321	0.0455524	0	0.0387468	0.0167127	0.0569858	0.0210042	0.0171771	0.0163124	0	0	0	0	0.148645	0	0.158813	0.167605	0.148117	0.152857	0.118268	0.149702	0.156956	0.160543	0.132456	0.0467534	0.122704	0.16413	0.106851	0.115338	0.145667	0.0789078
		Europe	AZ	0	0	0	0	0	0	0	0	0	0	0	0	0	0	0	0	0	0	0	0	0	0	0	0	0	0	0	0	0	0	0	0	0	0	0	0	0	0	0	0	0	0	0	0	0	0
			BE	0.0311406	0.082831	0.0580106	0.0773385	0.0494916	0.0277778	0.112375	0.0943765	0.0758172	0.116779	0.0439511	0.165971	0.148885	0.163009	0.105345	0.154554	0.184803	0	0.178381	0.145394	0.181984	0.159822	0.138172	0.150374	0	0	0.148645	0	0	0	0.0173532	0.0261445	0.00785744	0.0111241	0.0540233	0.00803359	0.0154637	0.0190827	0.0233902	0.186452	0.0356242	0.0226696	0.053655	0.0616776	0.0140385	0.111302
			CZ	0	0	0	0	0	0	0	0	0	0	0	0	0	0	0	0	0	0	0	0	0	0	0	0	0	0	0	0	0	0	0	0	0	0	0	0	0	0	0	0	0	0	0	0	0	0
			DK	0.0413089	0.0929994	0.068179	0.0875068	0.05966	0.0379461	0.122544	0.104545	0.0859856	0.126947	0.0541194	0.17614	0.159054	0.173177	0.115514	0.164722	0.194971	0	0.18855	0.155563	0.192153	0.169991	0.148341	0.160543	0	0	0.158813	0	0.0173532	0	0	0.0182179	0.0180098	0.0144549	0.0641917	0.0166647	0.0107558	0.0106918	0.0335585	0.19662	0.0457926	0.0147591	0.0638234	0.071846	0.0242069	0.121471
			FI	0.0501001	0.101791	0.0769702	0.0962981	0.0684512	0.0467374	0.131335	0.113336	0.0947768	0.135738	0.0629106	0.184931	0.167845	0.181968	0.124305	0.173513	0.203762	0	0.197341	0.164354	0.200944	0.178782	0.157132	0.169334	0	0	0.167605	0	0.0261445	0	0.0182179	0	0.026801	0.0232461	0.0729829	0.0254559	0.0193389	0.0154317	0.0423498	0.205412	0.0545838	0.0107078	0.0726146	0.0806372	0.0329981	0.130262
			FR	0.0306121	0.0823026	0.0574822	0.0768101	0.0489632	0.0272494	0.111847	0.093848	0.0752888	0.11625	0.0434226	0.165443	0.148357	0.16248	0.104817	0.154025	0.184274	0	0.177853	0.144866	0.181456	0.159294	0.137644	0.149846	0	0	0.148117	0	0.00785744	0	0.0180098	0.026801	0	0.0120529	0.0534949	0.0088983	0.0161523	0.0197392	0.0228618	0.185924	0.0350958	0.0233261	0.0531266	0.0611492	0.0135581	0.110774
			DE	0.035352	0.0870425	0.0622221	0.08155	0.0537031	0.0319893	0.116587	0.0985879	0.0800287	0.12099	0.0481625	0.170183	0.153097	0.16722	0.109557	0.158765	0.189014	0	0.182593	0.149606	0.186196	0.164034	0.142384	0.154586	0	0	0.152857	0	0.0111241	0	0.0144549	0.0232461	0.0120529	0	0.0582348	0.0105957	0.0125813	0.0161843	0.0276017	0.190664	0.0398357	0.0197712	0.0578665	0.0658891	0.01825	0.115514
			IT	0.0298915	0.0932235	0.0276337	0.0877951	0.0228778	0.0362808	0.0819983	0.104785	0.0862738	0.10059	0.0224134	0.135594	0.118508	0.132632	0.0749685	0.124177	0.154426	0	0.148005	0.115017	0.151607	0.129445	0.107796	0.119998	0	0	0.118268	0	0.0540233	0	0.0641917	0.0729829	0.0534949	0.0582348	0	0.0550802	0.0623342	0.0659211	0.0378341	0.156075	0.0277137	0.0695081	0.0228938	0.0308363	0.0510449	0.0809254
			NL	0.0321974	0.0838879	0.0590675	0.0783954	0.0505485	0.0288347	0.113432	0.0954334	0.0768741	0.117836	0.0450079	0.167028	0.149942	0.164066	0.106402	0.155611	0.18586	0	0.179438	0.146451	0.183041	0.160879	0.139229	0.151431	0	0	0.149702	0	0.00803359	0	0.0166647	0.0254559	0.0088983	0.0105957	0.0550802	0	0.0146951	0.0183941	0.0244471	0.187509	0.0366811	0.021981	0.0547119	0.0627345	0.0150954	0.112359
			NO	0.0394514	0.0911418	0.0663214	0.0856493	0.0578025	0.0360886	0.120686	0.102687	0.0841281	0.12509	0.0522619	0.174282	0.157196	0.17132	0.113656	0.162865	0.193114	0	0.186692	0.153705	0.190295	0.168133	0.146483	0.158685	0	0	0.156956	0	0.0154637	0	0.0107558	0.0193389	0.0161523	0.0125813	0.0623342	0.0146951	0	0.0122771	0.031701	0.194763	0.0439351	0.01588	0.0619659	0.0699885	0.0223493	0.119613
			PL	0.0430383	0.0947288	0.0699084	0.0892363	0.0613894	0.0396756	0.124273	0.106274	0.087715	0.128677	0.0558488	0.177869	0.160783	0.174907	0.117243	0.166452	0.196701	0	0.190279	0.157292	0.193882	0.17172	0.15007	0.162272	0	0	0.160543	0	0.0190827	0	0.0106918	0.0154317	0.0197392	0.0161843	0.0659211	0.0183941	0.0122771	0	0.035288	0.19835	0.047522	0.0119728	0.0655528	0.0735754	0.0259363	0.1232
			PT	0.0149513	0.0674584	0.0418213	0.0619819	0.0333023	0.0116526	0.096186	0.0789878	0.0604606	0.10139	0.0277618	0.149782	0.132696	0.14682	0.0891562	0.138365	0.168613	0	0.162192	0.129205	0.165795	0.143633	0.121983	0.134185	0	0	0.132456	0	0.0233902	0	0.0335585	0.0423498	0.0228618	0.0276017	0.0378341	0.0244471	0.031701	0.035288	0	0.170263	0.0194349	0.0388749	0.0374658	0.0454883	0.0204117	0.0951131
			RU	0.162288	0.170343	0.135082	0.179855	0.147364	0.16871	0.119885	0.153353	0.180495	0.131287	0.153337	0.0615335	0.0468014	0.0342151	0.0996448	0.0550482	0.0218369	0	0.0147911	0.0518936	0.0714777	0.0376579	0.0550482	0.0545037	0	0	0.0467534	0	0.186452	0	0.19662	0.205412	0.185924	0.190664	0.156075	0.187509	0.194763	0.19835	0.170263	0	0.160511	0.201937	0.144658	0.153145	0.183474	0.116715
			ES	0.0124372	0.0748244	0.0320693	0.069396	0.0235503	0.0178817	0.086434	0.0863859	0.0678747	0.105025	0.0181859	0.14003	0.122944	0.137068	0.0794042	0.128613	0.158861	0	0.15244	0.119453	0.156043	0.133881	0.112231	0.124433	0	0	0.122704	0	0.0356242	0	0.0457926	0.0545838	0.0350958	0.0398357	0.0277137	0.0366811	0.0439351	0.047522	0.0194349	0.160511	0	0.051109	0.0277137	0.0356403	0.0326458	0.0853611
			SE	0.0466253	0.0983157	0.0734953	0.0928232	0.0649763	0.0432625	0.12786	0.109861	0.091302	0.132264	0.0594358	0.181456	0.16437	0.178494	0.12083	0.170039	0.200287	0	0.193866	0.160879	0.197469	0.175307	0.153657	0.165859	0	0	0.16413	0	0.0226696	0	0.0147591	0.0107078	0.0233261	0.0197712	0.0695081	0.021981	0.01588	0.0119728	0.0388749	0.201937	0.051109	0	0.0691398	0.0771623	0.0295232	0.126787
			TR	0.0294912	0.0928552	0.0162163	0.0874268	0.0172732	0.0359125	0.0705809	0.104417	0.0859055	0.0891722	0.0213886	0.124177	0.107091	0.121215	0.0635512	0.11276	0.143008	0	0.136587	0.1036	0.14019	0.118028	0.0963781	0.10858	0	0	0.106851	0	0.053655	0	0.0638234	0.0726146	0.0531266	0.0578665	0.0228938	0.0547119	0.0619659	0.0655528	0.0374658	0.144658	0.0277137	0.0691398	0	0.0164885	0.0506766	0.0695081
			UA	0.0374177	0.100878	0.0247033	0.0954494	0.0251837	0.0439351	0.0790679	0.112439	0.0939281	0.0976592	0.0293151	0.132664	0.115578	0.129701	0.0720381	0.121247	0.151495	0	0.145074	0.112087	0.148677	0.126515	0.104865	0.117067	0	0	0.115338	0	0.0616776	0	0.071846	0.0806372	0.0611492	0.0658891	0.0308363	0.0627345	0.0699885	0.0735754	0.0454883	0.153145	0.0356403	0.0771623	0.0164885	0	0.0586992	0.077995
			GB	0.0281621	0.0798526	0.0550322	0.07436	0.0465132	0.0247994	0.109397	0.091398	0.0728388	0.1138	0.0409726	0.162993	0.145907	0.16003	0.102367	0.151575	0.181824	0	0.175403	0.142416	0.179006	0.156844	0.135194	0.147396	0	0	0.145667	0	0.0140385	0	0.0242069	0.0329981	0.0135581	0.01825	0.0510449	0.0150954	0.0223493	0.0259363	0.0204117	0.183474	0.0326458	0.0295232	0.0506766	0.0586992	0	0.108324
		Middle East	IR	0.0871385	0.117868	0.0599322	0.12738	0.0722143	0.0935598	0.0586672	0.100878	0.12802	0.0771143	0.0781872	0.0965062	0.079148	0.0932716	0.0281461	0.0850248	0.115065	0	0.108644	0.0756571	0.112599	0.090085	0.0684352	0.0806372	0	0	0.0789078	0	0.111302	0	0.121471	0.130262	0.110774	0.115514	0.0809254	0.112359	0.119613	0.1232	0.0951131	0.116715	0.0853611	0.126787	0.0695081	0.077995	0.108324	0
			IQ	0.0867062	0.117435	0.0594998	0.126947	0.0717819	0.0931275	0.0582348	0.100445	0.127588	0.076682	0.0777548	0.0960739	0.0787156	0.0928392	0.0277298	0.0845924	0.114633	0	0.108212	0.0752248	0.112167	0.0896526	0.0680028	0.0802048	0	0	0.0784754	0	0.11087	0	0.121038	0.12983	0.110342	0.115081	0.0804931	0.111927	0.119181	0.122768	0.0946807	0.116282	0.0849287	0.126355	0.0690757	0.0775627	0.107892	0.00832182
			IL	0.035288	0.098684	0.00861006	0.0932556	0.0205399	0.0417413	0.0629747	0.105329	0.0917343	0.081566	0.0264647	0.116571	0.0994847	0.113608	0.0559449	0.105153	0.135402	0	0.128981	0.0959938	0.132584	0.110422	0.0887719	0.100974	0	0	0.0992445	0	0.0594838	0	0.0696522	0.0784434	0.0589554	0.0636953	0.0288507	0.0605407	0.0677947	0.0713816	0.0432945	0.137052	0.0335105	0.0749685	0.017081	0.025552	0.0565054	0.0619018
			KW	0.086466	0.117195	0.0592596	0.126707	0.0715417	0.0928873	0.0579946	0.100205	0.127348	0.0764418	0.0775146	0.0958337	0.0784754	0.092599	0.0274735	0.0843523	0.114393	0	0.107972	0.0749846	0.111927	0.0894124	0.0677626	0.0799646	0	0	0.0782352	0	0.11063	0	0.120798	0.129589	0.110101	0.114841	0.0802529	0.111687	0.118941	0.122528	0.0944405	0.116042	0.0846885	0.126115	0.0688355	0.0773225	0.107651	0.00869012
			OM	0.0753529	0.106082	0.0481465	0.115594	0.0604286	0.0817741	0.0468815	0.0890921	0.116234	0.0653286	0.0664015	0.0848967	0.0675384	0.081662	0.0174813	0.0734153	0.103456	0	0.0970347	0.0640476	0.100926	0.0784754	0.0568256	0.0690277	0	0	0.0672982	0	0.0995167	0	0.109685	0.118476	0.0989883	0.103728	0.0691398	0.100574	0.107828	0.111414	0.0833274	0.105105	0.0735754	0.115001	0.0577224	0.0662094	0.0965383	0.0184742
			QA	0.0829911	0.11372	0.0557848	0.123232	0.0680669	0.0894124	0.0545198	0.0967304	0.123873	0.0729669	0.0740398	0.0923588	0.0750006	0.0891242	0.0239987	0.0808774	0.110918	0	0.104497	0.0715097	0.108452	0.0859376	0.0642878	0.0764898	0	0	0.0747604	0	0.107155	0	0.117323	0.126115	0.106627	0.111366	0.076778	0.108212	0.115466	0.119053	0.0909657	0.112567	0.0812137	0.12264	0.0653607	0.0738476	0.104177	0.0129496
			SA	0.042606	0.10597	0.0153996	0.100542	0.0276817	0.0490272	0.0523099	0.0946647	0.0990203	0.0709012	0.0336546	0.105906	0.0888199	0.102944	0.0452802	0.0944886	0.124737	0	0.118316	0.0853291	0.121919	0.0997569	0.0781071	0.0903091	0	0	0.0885797	0	0.0667698	0	0.0769382	0.0857294	0.0662414	0.0709813	0.0363929	0.0678267	0.0750806	0.0786676	0.0505805	0.126387	0.0408285	0.0822545	0.0249755	0.0334625	0.0637914	0.0512371
			AE	0.082783	0.113512	0.0555766	0.123024	0.0678587	0.0892042	0.0543116	0.0965222	0.123665	0.0727587	0.0738316	0.0921507	0.0747924	0.088916	0.0238065	0.0806692	0.11071	0	0.104289	0.0713015	0.108244	0.0857294	0.0640796	0.0762816	0	0	0.0745522	0	0.106947	0	0.117115	0.125906	0.106418	0.111158	0.0765699	0.108004	0.115258	0.118845	0.0907575	0.112359	0.0810055	0.122432	0.0651525	0.0736395	0.103968	0.0143268
		North America	CA	0.0478743	0.0856653	0.0747444	0.0802849	0.0662254	0.0433106	0.129109	0.0972108	0.0787637	0.119549	0.0606848	0.182705	0.165619	0.179743	0.122079	0.171288	0.172857	0	0.178862	0.162128	0.180159	0.176556	0.154906	0.167108	0	0	0.165379	0	0.0439191	0	0.0486429	0.0574341	0.0434707	0.0467214	0.0707571	0.0449759	0.0461449	0.0503724	0.0406364	0.173481	0.052358	0.0539593	0.0703888	0.0784114	0.0385226	0.128036
			MX	0.0881794	0.113192	0.115049	0.107972	0.10653	0.0833434	0.157853	0.120542	0.10645	0.139021	0.10099	0.180063	0.188758	0.179438	0.162384	0.188902	0.154138	0	0.160142	0.193914	0.16144	0.181104	0.195211	0.199102	0	0	0.188133	0	0.0879232	0	0.0935118	0.102303	0.0874748	0.0915902	0.111062	0.0889801	0.0910137	0.0952412	0.0811816	0.154762	0.0926631	0.0988281	0.110694	0.118716	0.082799	0.168341
			TT	0.0650244	0.07918	0.0918944	0.0745522	0.0833754	0.0593237	0.122896	0.0855693	0.073031	0.104064	0.0778349	0.17473	0.182769	0.174106	0.139229	0.18357	0.148805	0	0.15481	0.179278	0.156107	0.175771	0.172056	0.184258	0	0	0.182529	0	0.0704528	0	0.0790839	0.0878751	0.0699244	0.0746643	0.0879072	0.0715097	0.0765859	0.0808133	0.0594678	0.14943	0.0695081	0.0844003	0.0875389	0.0955615	0.0664175	0.145186
			US	0.0867542	0.112135	0.113624	0.106899	0.105105	0.0819022	0.158013	0.120238	0.105378	0.139181	0.0995647	0.180944	0.189639	0.180319	0.160959	0.189783	0.155018	0	0.161023	0.194795	0.16232	0.181984	0.193786	0.199983	0	0	0.189014	0	0.086482	0	0.0920706	0.100862	0.0860336	0.090149	0.109637	0.0875389	0.0895725	0.0938	0.0797405	0.155643	0.0912379	0.097387	0.109269	0.117291	0.0813578	0.166916
		South America	AR	0.0995487	0.0784274	0.126419	0.08163	0.1179	0.0935758	0.0982517	0.0699724	0.0810215	0.0794202	0.112359	0.151335	0.162769	0.178702	0.142032	0.16168	0.170583	0	0.176924	0.158781	0.134762	0.168197	0.156331	0.168165	0	0	0.165267	0	0.111591	0	0.121759	0.13055	0.111062	0.115802	0.122432	0.112647	0.119901	0.123488	0.0964422	0.180031	0.104032	0.127075	0.122063	0.130086	0.108484	0.149734
			BO	0	0	0	0	0	0	0	0	0	0	0	0	0	0	0	0	0	0	0	0	0	0	0	0	0	0	0	0	0	0	0	0	0	0	0	0	0	0	0	0	0	0	0	0	0	0
			BR	0.0774986	0.0606848	0.104369	0.0619018	0.0958497	0.0715097	0.0899408	0.0573541	0.060957	0.0711094	0.0903091	0.156572	0.154458	0.170391	0.133721	0.153369	0.190936	0	0.185892	0.150471	0.15433	0.165411	0.148021	0.159854	0	0	0.156956	0	0.0895405	0	0.0997089	0.1085	0.0890121	0.093752	0.100381	0.0905974	0.0978513	0.101438	0.0744241	0.193898	0.0819823	0.105025	0.100013	0.108036	0.0863699	0.141423
			CL	0.121967	0.109541	0.231289	0.114361	0.140318	0.118284	0.199183	0.100253	0.113528	0.196268	0.134778	0.143953	0.166804	0.171688	0.200656	0.158589	0.155274	0	0.166035	0.170679	0.125426	0.160927	0.167284	0.178574	0	0	0.175675	0	0.124769	0	0.131607	0.140398	0.124321	0.128981	0.14485	0.125826	0.129109	0.133336	0.115722	0.159774	0.126451	0.136923	0.144482	0.152504	0.119869	0.217614
			PE	0.103536	0.12083	0.241329	0.116074	0.121887	0.099853	0.209223	0.117868	0.114553	0.206308	0.116347	0.151415	0.171368	0.168629	0.210696	0.166516	0.143345	0	0.14967	0.175979	0.132872	0.163761	0.177325	0.185683	0	0	0.177933	0	0.106338	0	0.113176	0.121967	0.10589	0.11055	0.126419	0.107395	0.110678	0.114905	0.0972909	0.145555	0.10802	0.118492	0.12605	0.134073	0.101438	0.227654
			VE	0.0652806	0.0794362	0.0921507	0.0748084	0.0836317	0.0595799	0.123152	0.0858255	0.0732872	0.104321	0.0780911	0.174987	0.183025	0.174362	0.139486	0.183826	0.149061	0	0.155066	0.179534	0.156363	0.176028	0.172312	0.184514	0	0	0.182785	0	0.070709	0	0.0793401	0.0881314	0.0701806	0.0749205	0.0881634	0.0717659	0.0768421	0.0810696	0.059724	0.149686	0.0697643	0.0846565	0.0877951	0.0958177	0.0666737	0.145442
	Green_Renew_MDONH3ship
		GHG [kgCO2e/kgNH3]	Destination	Africa											Asia-Pacific																Europe																		Middle East
		Origin		DZ	AO	EG	GQ	LY	MA	MZ	NA	NG	ZA	TN	AU	BN	CN	IN	ID	JP	KZ	KR	MY	PG	PH	SG	TH	TM	UZ	VN	AZ	BE	CZ	DK	FI	FR	DE	IT	NL	NO	PL	PT	RU	ES	SE	TR	UA	GB	IR
		Africa	DZ	0	0.0638608	0.0307287	0.0589324	0.02298	0.0121637	0.0800852	0.0743572	0.0575513	0.0948267	0.0179644	0.128744	0.113232	0.126054	0.073703	0.118378	0.14584	0	0.140011	0.110062	0.143282	0.123161	0.103506	0.114584	0	0	0.113014	0	0.0282718	0	0.0375034	0.0454848	0.0277921	0.0320953	0.0271378	0.0292313	0.035817	0.0390735	0.0135739	0.147338	0.0112915	0.04233	0.0267744	0.0339707	0.0255677	0.0791111
			AO	0.0638608	0	0.0882555	0.015333	0.0805213	0.0579874	0.0602699	0.0217006	0.0159872	0.0431732	0.0754912	0.120762	0.118843	0.133309	0.100017	0.117855	0.153124	0	0.147381	0.115223	0.136013	0.128787	0.112999	0.123743	0	0	0.121111	0	0.0752004	0	0.084432	0.0924134	0.0747206	0.0790239	0.0846355	0.0761599	0.0827456	0.0860021	0.0612439	0.15465	0.0679314	0.0892586	0.0843012	0.0915847	0.0724963	0.107009
			EG	0.0307287	0.0882555	0	0.0833271	0.0171793	0.0365585	0.0553851	0.0938381	0.081946	0.0722637	0.022602	0.104044	0.0885317	0.101354	0.049003	0.0936782	0.12114	0	0.115311	0.0853624	0.118582	0.0984612	0.0788058	0.0898837	0	0	0.0883136	0	0.0526665	0	0.0618981	0.0698795	0.0521868	0.05649	0.025088	0.053626	0.0602117	0.0634682	0.0379686	0.122638	0.029115	0.0667248	0.0147224	0.0224275	0.0499625	0.0544111
			GQ	0.0589324	0.015333	0.0833271	0	0.0755929	0.0528991	0.0689054	0.0303798	0.00786049	0.0518088	0.0705628	0.129398	0.127479	0.141944	0.108652	0.12649	0.161759	0	0.156017	0.123859	0.144648	0.137423	0.121635	0.132378	0	0	0.129747	0	0.0702139	0	0.0794455	0.0874268	0.0697341	0.0740374	0.0797072	0.0711734	0.0777591	0.0810156	0.0562719	0.163286	0.063003	0.0842721	0.0793728	0.0866563	0.0675098	0.115645
			LY	0.02298	0.0805213	0.0171793	0.0755929	0	0.0288243	0.0665358	0.0910177	0.0742118	0.0834143	0.0137338	0.115194	0.0996823	0.112505	0.0601536	0.104829	0.132291	0	0.126461	0.0965131	0.129732	0.109612	0.0899564	0.101034	0	0	0.0994643	0	0.0449323	0	0.0541639	0.0621453	0.0444526	0.0487558	0.0207702	0.0458918	0.0524775	0.055734	0.0302344	0.133788	0.0213808	0.0589905	0.0156819	0.0228637	0.0422283	0.0655617
			MA	0.0121637	0.0579874	0.0365585	0.0528991	0.0288243	0	0.0859149	0.0684693	0.0516198	0.0888079	0.0237941	0.134573	0.119061	0.131884	0.0795327	0.124208	0.15167	0	0.14584	0.115892	0.149111	0.128991	0.109336	0.120413	0	0	0.118843	0	0.0252188	0	0.0344504	0.0424318	0.0247391	0.0290423	0.0329385	0.0261783	0.032764	0.0360205	0.0105791	0.153168	0.0162344	0.0392771	0.0326041	0.0398877	0.0225148	0.0849408
			MZ	0.0800852	0.0602699	0.0553851	0.0689054	0.0665358	0.0859149	0	0.0448451	0.069487	0.0232707	0.0719584	0.0830218	0.0747352	0.0875577	0.0465751	0.0745171	0.107344	0	0.101514	0.0715659	0.0979669	0.0846646	0.0650093	0.0760872	0	0	0.0745171	0	0.102023	0	0.111255	0.119236	0.101543	0.105846	0.0744444	0.102982	0.109568	0.112825	0.0873251	0.108841	0.0784714	0.116081	0.0640788	0.071784	0.0993189	0.0532626
			NA	0.0743572	0.0217006	0.0938381	0.0303798	0.0910177	0.0684693	0.0448451	0	0.0309323	0.0277484	0.0859876	0.105338	0.103419	0.117884	0.0845919	0.10243	0.137699	0	0.131957	0.0997986	0.120588	0.113363	0.0975743	0.108318	0	0	0.105687	0	0.0856823	0	0.0949139	0.102895	0.0852025	0.0895058	0.095132	0.0866418	0.0932275	0.096484	0.0717113	0.139226	0.0784278	0.0997405	0.0947976	0.102081	0.0829782	0.0915847
			NG	0.0575513	0.0159872	0.081946	0.00786049	0.0742118	0.0516198	0.069487	0.0309323	0	0.0523903	0.0691817	0.129979	0.12806	0.142526	0.109234	0.127072	0.162341	0	0.156599	0.124441	0.14523	0.138004	0.122216	0.13296	0	0	0.130328	0	0.0688328	0	0.0780644	0.0860457	0.068353	0.0726562	0.0783261	0.0697923	0.076378	0.0796345	0.0548908	0.163868	0.0616219	0.082891	0.0779917	0.0852752	0.0661287	0.116227
			ZA	0.0948267	0.0431732	0.0722637	0.0518088	0.0834143	0.0888079	0.0232707	0.0277484	0.0523903	0	0.088837	0.0868308	0.0833853	0.0978506	0.0630176	0.0823967	0.117666	0	0.111923	0.0797653	0.102081	0.0933292	0.0766687	0.0877467	0	0	0.0856532	0	0.106021	0	0.115253	0.123234	0.105541	0.109844	0.091323	0.10698	0.113566	0.116823	0.0920499	0.119192	0.09535	0.120079	0.0809574	0.0886626	0.103317	0.0700103
			TN	0.0179644	0.0754912	0.022602	0.0705628	0.0137338	0.0237941	0.0719584	0.0859876	0.0691817	0.088837	0	0.120617	0.105105	0.117928	0.0655763	0.110251	0.137714	0	0.131884	0.101936	0.135155	0.115034	0.0953791	0.106457	0	0	0.104887	0	0.0399022	0	0.0491338	0.0571152	0.0394224	0.0437257	0.0203486	0.0408617	0.0474474	0.0507039	0.0252043	0.139211	0.0165106	0.0539604	0.0194182	0.0266145	0.0371981	0.0709844
		Asia-Pacific	AU	0.128744	0.120762	0.104044	0.129398	0.115194	0.134573	0.0830218	0.105338	0.129979	0.0868308	0.120617	0	0.0324297	0.0412688	0.0721183	0.0230236	0.0501224	0	0.0486831	0.0336218	0.023169	0.0312812	0.0339125	0.0428825	0	0	0.0398586	0	0.150682	0	0.159913	0.167895	0.150202	0.154505	0.123103	0.151641	0.158227	0.161483	0.135984	0.0558649	0.12713	0.16474	0.112737	0.120443	0.147977	0.0876158
			BN	0.113232	0.118843	0.0885317	0.127479	0.0996823	0.119061	0.0747352	0.103419	0.12806	0.0833853	0.105105	0.0324297	0	0.0240849	0.0563592	0.0197235	0.0407745	0	0.0351628	0.0108117	0.0439147	0.0166269	0.0159581	0.0206103	0	0	0.0152603	0	0.13517	0	0.144401	0.152383	0.13469	0.138993	0.107591	0.136129	0.142715	0.145971	0.120472	0.0424899	0.111618	0.149228	0.0972254	0.104931	0.132465	0.0718567
			CN	0.126054	0.133309	0.101354	0.141944	0.112505	0.131884	0.0875577	0.117884	0.142526	0.0978506	0.117928	0.0412688	0.0240849	0	0.0691817	0.0312666	0.030438	0	0.0238087	0.0268907	0.0517943	0.0168304	0.0287079	0.0292168	0	0	0.0207121	0	0.147992	0	0.157224	0.165205	0.147512	0.151816	0.120413	0.148952	0.155537	0.158794	0.133294	0.0310631	0.124441	0.16205	0.110048	0.117753	0.145288	0.0846792
			IN	0.073703	0.100017	0.049003	0.108652	0.0601536	0.0795327	0.0465751	0.0845919	0.109234	0.0630176	0.0655763	0.0721183	0.0563592	0.0691817	0	0.0616946	0.0889679	0	0.0831381	0.0531899	0.0866709	0.0662886	0.0466333	0.0577112	0	0	0.0561411	0	0.0956408	0	0.104872	0.112854	0.095161	0.0994643	0.0680622	0.0966003	0.103186	0.106443	0.0809429	0.0904653	0.0720893	0.109699	0.0576967	0.0654018	0.0929367	0.0255532
			ID	0.118378	0.117855	0.0936782	0.12649	0.104829	0.124208	0.0745171	0.10243	0.127072	0.0823967	0.110251	0.0230236	0.0197235	0.0312666	0.0616946	0	0.0446561	0	0.0427662	0.021439	0.0364567	0.0208865	0.0214826	0.0307142	0	0	0.0277194	0	0.140316	0	0.149548	0.157529	0.139836	0.144139	0.112737	0.141275	0.147861	0.151118	0.125618	0.049977	0.116764	0.154374	0.102372	0.110077	0.137612	0.0771921
			JP	0.14584	0.153124	0.12114	0.161759	0.132291	0.15167	0.107344	0.137699	0.162341	0.117666	0.137714	0.0501224	0.0407745	0.030438	0.0889679	0.0446561	0	0	0.0157546	0.0451068	0.0560975	0.0320226	0.0485814	0.0483924	0	0	0.041356	0	0.167778	0	0.17701	0.184991	0.167298	0.171602	0.1402	0.168738	0.175323	0.17858	0.15308	0.0198252	0.144227	0.181836	0.129834	0.137539	0.165074	0.104465
			KZ	0	0	0	0	0	0	0	0	0	0	0	0	0	0	0	0	0	0	0	0	0	0	0	0	0	0	0	0	0	0	0	0	0	0	0	0	0	0	0	0	0	0	0	0	0	0
			KR	0.140011	0.147381	0.115311	0.156017	0.126461	0.14584	0.101514	0.131957	0.156599	0.111923	0.131884	0.0486831	0.0351628	0.0238087	0.0831381	0.0427662	0.0157546	0	0	0.0398731	0.0577112	0.0269343	0.0425626	0.0422573	0	0	0.0351773	0	0.161948	0	0.17118	0.179161	0.161469	0.165772	0.13437	0.162908	0.169494	0.17275	0.147251	0.0134285	0.138397	0.176007	0.124004	0.13171	0.159244	0.0986356
			MY	0.110062	0.115223	0.0853624	0.123859	0.0965131	0.115892	0.0715659	0.0997986	0.124441	0.0797653	0.101936	0.0336218	0.0108117	0.0268907	0.0531899	0.021439	0.0451068	0	0.0398731	0	0.0474329	0.0210755	0.0126289	0.0192292	0	0	0.0151731	0	0.132	0	0.141232	0.149213	0.131521	0.135824	0.104422	0.13296	0.139545	0.142802	0.117302	0.047113	0.108449	0.146058	0.0940561	0.101761	0.129296	0.0686874
			PG	0.143282	0.136013	0.118582	0.144648	0.129732	0.149111	0.0979669	0.120588	0.14523	0.102081	0.135155	0.023169	0.0439147	0.0517943	0.0866709	0.0364567	0.0560975	0	0.0577112	0.0474329	0	0.0418067	0.0476073	0.0565336	0	0	0.0517361	0	0.16522	0	0.174451	0.182432	0.16474	0.169043	0.137641	0.166179	0.172765	0.176021	0.150522	0.064893	0.141668	0.179278	0.127275	0.134981	0.162515	0.102226
			PH	0.123161	0.128787	0.0984612	0.137423	0.109612	0.128991	0.0846646	0.113363	0.138004	0.0933292	0.115034	0.0312812	0.0166269	0.0168304	0.0662886	0.0208865	0.0320226	0	0.0269343	0.0210755	0.0418067	0	0.0257277	0.026062	0	0	0.0190693	0	0.145099	0	0.154331	0.162312	0.144619	0.148922	0.11752	0.146058	0.152644	0.155901	0.130401	0.0341888	0.121547	0.159157	0.107155	0.11486	0.142395	0.0817861
			SG	0.103506	0.112999	0.0788058	0.121635	0.0899564	0.109336	0.0650093	0.0975743	0.122216	0.0766687	0.0953791	0.0339125	0.0159581	0.0287079	0.0466333	0.0214826	0.0485814	0	0.0425626	0.0126289	0.0476073	0.0257277	0	0.0171793	0	0	0.0155947	0	0.125444	0	0.134675	0.142657	0.124964	0.129267	0.0978651	0.126403	0.132989	0.136245	0.110746	0.049977	0.101892	0.139502	0.0874995	0.0952046	0.12274	0.0621308
			TH	0.114584	0.123743	0.0898837	0.132378	0.101034	0.120413	0.0760872	0.108318	0.13296	0.0877467	0.106457	0.0428825	0.0206103	0.0292168	0.0577112	0.0307142	0.0483924	0	0.0422573	0.0192292	0.0565336	0.026062	0.0171793	0	0	0	0.0148096	0	0.136522	0	0.145753	0.153735	0.136042	0.140345	0.108943	0.137481	0.144067	0.147323	0.121824	0.0494827	0.11297	0.15058	0.0985775	0.106283	0.133818	0.0732087
			TM	0	0	0	0	0	0	0	0	0	0	0	0	0	0	0	0	0	0	0	0	0	0	0	0	0	0	0	0	0	0	0	0	0	0	0	0	0	0	0	0	0	0	0	0	0	0
			UZ	0	0	0	0	0	0	0	0	0	0	0	0	0	0	0	0	0	0	0	0	0	0	0	0	0	0	0	0	0	0	0	0	0	0	0	0	0	0	0	0	0	0	0	0	0	0
			VN	0.113014	0.121111	0.0883136	0.129747	0.0994643	0.118843	0.0745171	0.105687	0.130328	0.0856532	0.104887	0.0398586	0.0152603	0.0207121	0.0561411	0.0277194	0.041356	0	0.0351773	0.0151731	0.0517361	0.0190693	0.0155947	0.0148096	0	0	0	0	0.134951	0	0.144183	0.152164	0.134472	0.138775	0.107373	0.135911	0.142497	0.145753	0.120254	0.0424463	0.1114	0.14901	0.0970074	0.104712	0.132247	0.0716386
		Europe	AZ	0	0	0	0	0	0	0	0	0	0	0	0	0	0	0	0	0	0	0	0	0	0	0	0	0	0	0	0	0	0	0	0	0	0	0	0	0	0	0	0	0	0	0	0	0	0
			BE	0.0282718	0.0752004	0.0526665	0.0702139	0.0449323	0.0252188	0.102023	0.0856823	0.0688328	0.106021	0.0399022	0.150682	0.13517	0.147992	0.0956408	0.140316	0.167778	0	0.161948	0.132	0.16522	0.145099	0.125444	0.136522	0	0	0.134951	0	0	0	0.0157546	0.023736	0.00713359	0.0100993	0.0490466	0.00729351	0.0140391	0.0173247	0.0212354	0.169276	0.0323424	0.0205812	0.0487122	0.0559957	0.0127453	0.101049
			CZ	0	0	0	0	0	0	0	0	0	0	0	0	0	0	0	0	0	0	0	0	0	0	0	0	0	0	0	0	0	0	0	0	0	0	0	0	0	0	0	0	0	0	0	0	0	0
			DK	0.0375034	0.084432	0.0618981	0.0794455	0.0541639	0.0344504	0.111255	0.0949139	0.0780644	0.115253	0.0491338	0.159913	0.144401	0.157224	0.104872	0.149548	0.17701	0	0.17118	0.141232	0.174451	0.154331	0.134675	0.145753	0	0	0.144183	0	0.0157546	0	0	0.0165397	0.0163507	0.0131232	0.0582782	0.0151295	0.00976497	0.00970681	0.030467	0.178507	0.0415741	0.0133995	0.0579438	0.0652273	0.0219769	0.110281
			FI	0.0454848	0.0924134	0.0698795	0.0874268	0.0621453	0.0424318	0.119236	0.102895	0.0860457	0.123234	0.0571152	0.167895	0.152383	0.165205	0.112854	0.157529	0.184991	0	0.179161	0.149213	0.182432	0.162312	0.142657	0.153735	0	0	0.152164	0	0.023736	0	0.0165397	0	0.024332	0.0211046	0.0662595	0.0231108	0.0175573	0.0140101	0.0384484	0.186489	0.0495554	0.00972135	0.0659252	0.0732087	0.0299582	0.118262
			FR	0.0277921	0.0747206	0.0521868	0.0697341	0.0444526	0.0247391	0.101543	0.0852025	0.068353	0.105541	0.0394224	0.150202	0.13469	0.147512	0.095161	0.139836	0.167298	0	0.161469	0.131521	0.16474	0.144619	0.124964	0.136042	0	0	0.134472	0	0.00713359	0	0.0163507	0.024332	0	0.0109425	0.0485668	0.00807856	0.0146643	0.0179208	0.0207557	0.168796	0.0318627	0.0211773	0.0482324	0.055516	0.0123091	0.100569
			DE	0.0320953	0.0790239	0.05649	0.0740374	0.0487558	0.0290423	0.105846	0.0895058	0.0726562	0.109844	0.0437257	0.154505	0.138993	0.151816	0.0994643	0.144139	0.171602	0	0.165772	0.135824	0.169043	0.148922	0.129267	0.140345	0	0	0.138775	0	0.0100993	0	0.0131232	0.0211046	0.0109425	0	0.0528701	0.00961959	0.0114223	0.0146933	0.0250589	0.173099	0.0361659	0.0179498	0.0525357	0.0598192	0.0165687	0.104872
			IT	0.0271378	0.0846355	0.025088	0.0797072	0.0207702	0.0329385	0.0744444	0.095132	0.0783261	0.091323	0.0203486	0.123103	0.107591	0.120413	0.0680622	0.112737	0.1402	0	0.13437	0.104422	0.137641	0.11752	0.0978651	0.108943	0	0	0.107373	0	0.0490466	0	0.0582782	0.0662595	0.0485668	0.0528701	0	0.0500061	0.0565918	0.0598483	0.0343487	0.141697	0.0251607	0.0631048	0.0207848	0.0279956	0.0463425	0.0734704
			NL	0.0292313	0.0761599	0.053626	0.0711734	0.0458918	0.0261783	0.102982	0.0866418	0.0697923	0.10698	0.0408617	0.151641	0.136129	0.148952	0.0966003	0.141275	0.168738	0	0.162908	0.13296	0.166179	0.146058	0.126403	0.137481	0	0	0.135911	0	0.00729351	0	0.0151295	0.0231108	0.00807856	0.00961959	0.0500061	0	0.0133413	0.0166996	0.0221949	0.170235	0.0333019	0.0199561	0.0496717	0.0569552	0.0137048	0.102008
			NO	0.035817	0.0827456	0.0602117	0.0777591	0.0524775	0.032764	0.109568	0.0932275	0.076378	0.113566	0.0474474	0.158227	0.142715	0.155537	0.103186	0.147861	0.175323	0	0.169494	0.139545	0.172765	0.152644	0.132989	0.144067	0	0	0.142497	0	0.0140391	0	0.00976497	0.0175573	0.0146643	0.0114223	0.0565918	0.0133413	0	0.0111461	0.0287806	0.176821	0.0398877	0.0144171	0.0562574	0.0635409	0.0202905	0.108594
			PL	0.0390735	0.0860021	0.0634682	0.0810156	0.055734	0.0360205	0.112825	0.096484	0.0796345	0.116823	0.0507039	0.161483	0.145971	0.158794	0.106443	0.151118	0.17858	0	0.17275	0.142802	0.176021	0.155901	0.136245	0.147323	0	0	0.145753	0	0.0173247	0	0.00970681	0.0140101	0.0179208	0.0146933	0.0598483	0.0166996	0.0111461	0	0.0320371	0.180077	0.0431442	0.0108699	0.0595139	0.0667974	0.023547	0.111851
			PT	0.0135739	0.0612439	0.0379686	0.0562719	0.0302344	0.0105791	0.0873251	0.0717113	0.0548908	0.0920499	0.0252043	0.135984	0.120472	0.133294	0.0809429	0.125618	0.15308	0	0.147251	0.117302	0.150522	0.130401	0.110746	0.121824	0	0	0.120254	0	0.0212354	0	0.030467	0.0384484	0.0207557	0.0250589	0.0343487	0.0221949	0.0287806	0.0320371	0	0.154578	0.0176445	0.0352937	0.0340143	0.0412978	0.0185314	0.086351
			RU	0.147338	0.15465	0.122638	0.163286	0.133788	0.153168	0.108841	0.139226	0.163868	0.119192	0.139211	0.0558649	0.0424899	0.0310631	0.0904653	0.049977	0.0198252	0	0.0134285	0.047113	0.064893	0.0341888	0.049977	0.0494827	0	0	0.0424463	0	0.169276	0	0.178507	0.186489	0.168796	0.173099	0.141697	0.170235	0.176821	0.180077	0.154578	0	0.145724	0.183334	0.131332	0.139037	0.166572	0.105963
			ES	0.0112915	0.0679314	0.029115	0.063003	0.0213808	0.0162344	0.0784714	0.0784278	0.0616219	0.09535	0.0165106	0.12713	0.111618	0.124441	0.0720893	0.116764	0.144227	0	0.138397	0.108449	0.141668	0.121547	0.101892	0.11297	0	0	0.1114	0	0.0323424	0	0.0415741	0.0495554	0.0318627	0.0361659	0.0251607	0.0333019	0.0398877	0.0431442	0.0176445	0.145724	0	0.0464007	0.0251607	0.032357	0.0296384	0.0774974
			SE	0.04233	0.0892586	0.0667248	0.0842721	0.0589905	0.0392771	0.116081	0.0997405	0.082891	0.120079	0.0539604	0.16474	0.149228	0.16205	0.109699	0.154374	0.181836	0	0.176007	0.146058	0.179278	0.159157	0.139502	0.15058	0	0	0.14901	0	0.0205812	0	0.0133995	0.00972135	0.0211773	0.0179498	0.0631048	0.0199561	0.0144171	0.0108699	0.0352937	0.183334	0.0464007	0	0.0627704	0.0700539	0.0268035	0.115107
			TR	0.0267744	0.0843012	0.0147224	0.0793728	0.0156819	0.0326041	0.0640788	0.0947976	0.0779917	0.0809574	0.0194182	0.112737	0.0972254	0.110048	0.0576967	0.102372	0.129834	0	0.124004	0.0940561	0.127275	0.107155	0.0874995	0.0985775	0	0	0.0970074	0	0.0487122	0	0.0579438	0.0659252	0.0482324	0.0525357	0.0207848	0.0496717	0.0562574	0.0595139	0.0340143	0.131332	0.0251607	0.0627704	0	0.0149696	0.0460081	0.0631048
			UA	0.0339707	0.0915847	0.0224275	0.0866563	0.0228637	0.0398877	0.071784	0.102081	0.0852752	0.0886626	0.0266145	0.120443	0.104931	0.117753	0.0654018	0.110077	0.137539	0	0.13171	0.101761	0.134981	0.11486	0.0952046	0.106283	0	0	0.104712	0	0.0559957	0	0.0652273	0.0732087	0.055516	0.0598192	0.0279956	0.0569552	0.0635409	0.0667974	0.0412978	0.139037	0.032357	0.0700539	0.0149696	0	0.0532917	0.0708099
			GB	0.0255677	0.0724963	0.0499625	0.0675098	0.0422283	0.0225148	0.0993189	0.0829782	0.0661287	0.103317	0.0371981	0.147977	0.132465	0.145288	0.0929367	0.137612	0.165074	0	0.159244	0.129296	0.162515	0.142395	0.12274	0.133818	0	0	0.132247	0	0.0127453	0	0.0219769	0.0299582	0.0123091	0.0165687	0.0463425	0.0137048	0.0202905	0.023547	0.0185314	0.166572	0.0296384	0.0268035	0.0460081	0.0532917	0	0.0983448
		Middle East	IR	0.0791111	0.107009	0.0544111	0.115645	0.0655617	0.0849408	0.0532626	0.0915847	0.116227	0.0700103	0.0709844	0.0876158	0.0718567	0.0846792	0.0255532	0.0771921	0.104465	0	0.0986356	0.0686874	0.102226	0.0817861	0.0621308	0.0732087	0	0	0.0716386	0	0.101049	0	0.110281	0.118262	0.100569	0.104872	0.0734704	0.102008	0.108594	0.111851	0.086351	0.105963	0.0774974	0.115107	0.0631048	0.0708099	0.0983448	0
			IQ	0.0787186	0.106617	0.0540186	0.115253	0.0651692	0.0845483	0.0528701	0.0911922	0.115834	0.0696178	0.0705919	0.0872233	0.0714641	0.0842866	0.0251752	0.0767996	0.104073	0	0.0982431	0.0682949	0.101834	0.0813936	0.0617382	0.0728162	0	0	0.0712461	0	0.100656	0	0.109888	0.117869	0.100177	0.10448	0.0730778	0.101616	0.108202	0.111458	0.0859585	0.10557	0.0771049	0.114715	0.0627123	0.0704174	0.0979523	0.00755519
			IL	0.0320371	0.089593	0.00781688	0.0846646	0.0186477	0.0378959	0.0571733	0.0956262	0.0832835	0.0740519	0.0240267	0.105832	0.0903199	0.103142	0.0507911	0.0954663	0.122929	0	0.117099	0.0871506	0.12037	0.100249	0.080594	0.0916719	0	0	0.0901018	0	0.054004	0	0.0632356	0.071217	0.0535243	0.0578275	0.0261929	0.0549635	0.0615492	0.0648057	0.0393061	0.124426	0.0304234	0.0680622	0.0155075	0.0231981	0.0513	0.0561993
			KW	0.0785005	0.106399	0.0538005	0.115034	0.0649511	0.0843302	0.052652	0.0909741	0.115616	0.0693997	0.0703738	0.0870052	0.0712461	0.0840686	0.0249426	0.0765815	0.103855	0	0.098025	0.0680768	0.101616	0.0811755	0.0615202	0.0725981	0	0	0.071028	0	0.100438	0	0.10967	0.117651	0.0999586	0.104262	0.0728598	0.101398	0.107984	0.11124	0.0857404	0.105352	0.0768868	0.114497	0.0624942	0.0701993	0.0977343	0.00788957
			OM	0.0684112	0.0963095	0.0437111	0.104945	0.0548618	0.0742409	0.0425626	0.0808847	0.105527	0.0593104	0.0602844	0.0770758	0.0613166	0.0741391	0.0158709	0.0666521	0.0939253	0	0.0880956	0.0581473	0.0916283	0.0712461	0.0515907	0.0626687	0	0	0.0610986	0	0.090349	0	0.0995806	0.107562	0.0898692	0.0941724	0.0627704	0.0913085	0.0978942	0.101151	0.0756511	0.0954227	0.0667974	0.104407	0.0524048	0.06011	0.0876449	0.0167723
			QA	0.0753458	0.103244	0.0506458	0.11188	0.0617964	0.0811755	0.0494973	0.0878194	0.112461	0.066245	0.067219	0.0838505	0.0680913	0.0809138	0.0217879	0.0734268	0.1007	0	0.0948703	0.064922	0.0984612	0.0780208	0.0583654	0.0694434	0	0	0.0678733	0	0.0972836	0	0.106515	0.114497	0.0968038	0.101107	0.069705	0.0982431	0.104829	0.108085	0.0825857	0.102197	0.0737321	0.111342	0.0593395	0.0670446	0.0945795	0.0117567
			SA	0.038681	0.0962078	0.013981	0.0912794	0.0251316	0.0445107	0.047491	0.085944	0.0898983	0.0643696	0.0305543	0.0961496	0.0806376	0.0934601	0.0411088	0.085784	0.113246	0	0.107417	0.0774683	0.110688	0.090567	0.0709117	0.0819896	0	0	0.0804195	0	0.0606188	0	0.0698504	0.0778318	0.060139	0.0644423	0.0330403	0.0615783	0.068164	0.0714205	0.0459209	0.114744	0.0370673	0.074677	0.0226747	0.0303798	0.0579147	0.046517
			AE	0.0751568	0.103055	0.0504568	0.111691	0.0616074	0.0809865	0.0493083	0.0876304	0.112272	0.066056	0.0670301	0.0836615	0.0679023	0.0807248	0.0216134	0.0732378	0.100511	0	0.0946813	0.0647331	0.0982722	0.0778318	0.0581764	0.0692544	0	0	0.0676843	0	0.0970946	0	0.106326	0.114308	0.0966148	0.100918	0.069516	0.0980541	0.10464	0.107896	0.0823967	0.102008	0.0735431	0.111153	0.0591505	0.0668556	0.0943905	0.0130069
		North America	CA	0.043464	0.0777736	0.0678587	0.0728889	0.0601245	0.0393207	0.117215	0.0882555	0.0715077	0.108536	0.0550944	0.165874	0.150362	0.163184	0.110833	0.155508	0.156933	0	0.162385	0.147192	0.163562	0.160291	0.140636	0.151714	0	0	0.150144	0	0.0398731	0	0.0441618	0.0521432	0.039466	0.0424173	0.0642388	0.0408326	0.0418939	0.0457319	0.0368928	0.1575	0.0475346	0.0489884	0.0639044	0.0711879	0.0349738	0.116241
			MX	0.0800561	0.102764	0.104451	0.098025	0.0967166	0.0756656	0.143311	0.109437	0.0966439	0.126214	0.0916865	0.163475	0.171369	0.162908	0.147425	0.1715	0.139938	0	0.14539	0.17605	0.146567	0.16442	0.177228	0.180761	0	0	0.170802	0	0.0798235	0	0.0848972	0.0928786	0.0794164	0.0831527	0.100831	0.080783	0.0826293	0.0864673	0.073703	0.140505	0.0841267	0.0897238	0.100496	0.10778	0.0751713	0.152833
			TT	0.0590342	0.0718857	0.0834289	0.0676843	0.0756947	0.0538586	0.111574	0.0776864	0.0663032	0.0944777	0.0706645	0.158634	0.165932	0.158067	0.126403	0.166659	0.135097	0	0.140549	0.162763	0.141726	0.159579	0.156206	0.167284	0	0	0.165714	0	0.0639625	0	0.0717985	0.0797799	0.0634828	0.067786	0.0798089	0.064922	0.0695306	0.0733686	0.0539895	0.135664	0.0631048	0.0766251	0.0794746	0.0867581	0.060299	0.131811
			US	0.0787622	0.101805	0.103157	0.097051	0.0954227	0.0743572	0.143456	0.109161	0.0956699	0.12636	0.0903926	0.164275	0.172169	0.163708	0.146131	0.1723	0.140738	0	0.146189	0.17685	0.147367	0.16522	0.175934	0.18156	0	0	0.171602	0	0.0785151	0	0.0835888	0.0915702	0.078108	0.0818442	0.099537	0.0794746	0.0813209	0.0851589	0.0723946	0.141305	0.0828328	0.0884154	0.0992026	0.106486	0.0738629	0.151539
		South America	AR	0.090378	0.0712024	0.114773	0.07411	0.107039	0.0849554	0.0892005	0.0635264	0.0735576	0.0721038	0.102008	0.137394	0.147774	0.162239	0.128947	0.146785	0.154868	0	0.160626	0.144154	0.122347	0.152702	0.14193	0.152673	0	0	0.150042	0	0.101311	0	0.110542	0.118524	0.100831	0.105134	0.111153	0.10227	0.108856	0.112112	0.0875577	0.163446	0.0944487	0.115369	0.110818	0.118102	0.0984902	0.13594
			BO	0	0	0	0	0	0	0	0	0	0	0	0	0	0	0	0	0	0	0	0	0	0	0	0	0	0	0	0	0	0	0	0	0	0	0	0	0	0	0	0	0	0	0	0	0	0
			BR	0.0703592	0.0550944	0.094754	0.0561993	0.0870198	0.064922	0.0816553	0.0520705	0.0553415	0.0645586	0.0819896	0.142148	0.140229	0.154694	0.121402	0.13924	0.173346	0	0.168767	0.136609	0.140112	0.150173	0.134384	0.145128	0	0	0.142497	0	0.0812918	0	0.0905234	0.0985048	0.0808121	0.0851153	0.091134	0.0822513	0.088837	0.0920935	0.067568	0.176036	0.0744299	0.09535	0.0907996	0.0980832	0.0784133	0.128395
			CL	0.110731	0.0994497	0.209982	0.103826	0.127392	0.107387	0.180833	0.0910177	0.10307	0.178187	0.122362	0.130692	0.151438	0.155872	0.182171	0.14398	0.14097	0	0.15074	0.154956	0.113871	0.146102	0.151874	0.162123	0	0	0.159492	0	0.113275	0	0.119483	0.127464	0.112868	0.117099	0.131506	0.114235	0.117215	0.121053	0.105061	0.145055	0.114802	0.12431	0.131172	0.138455	0.108827	0.197567
			PE	0.093998	0.109699	0.219097	0.105381	0.110659	0.0906543	0.189949	0.107009	0.104	0.187303	0.105628	0.137467	0.155581	0.153095	0.191286	0.151176	0.130139	0	0.135882	0.159768	0.120632	0.148675	0.160989	0.168578	0	0	0.161541	0	0.0965421	0	0.10275	0.110731	0.0961351	0.100366	0.114773	0.0975016	0.100482	0.10432	0.0883282	0.132146	0.0980686	0.107576	0.114438	0.121722	0.0920935	0.206682
			VE	0.0592668	0.0721183	0.0836615	0.0679169	0.0759273	0.0540913	0.111807	0.077919	0.0665358	0.0947104	0.0708972	0.158866	0.166165	0.158299	0.126636	0.166891	0.135329	0	0.140781	0.162995	0.141959	0.159811	0.156439	0.167517	0	0	0.165946	0	0.0641951	0	0.0720311	0.0800125	0.0637154	0.0680186	0.0800415	0.0651547	0.0697632	0.0736012	0.0542221	0.135896	0.0633374	0.0768577	0.0797072	0.0869907	0.0605316	0.132044
	Green_Renew_NH3ship
		GHG [kgCO2e/kgNH3]	Destination	Africa											Asia-Pacific																Europe																		Middle East
		Origin		DZ	AO	EG	GQ	LY	MA	MZ	NA	NG	ZA	TN	AU	BN	CN	IN	ID	JP	KZ	KR	MY	PG	PH	SG	TH	TM	UZ	VN	AZ	BE	CZ	DK	FI	FR	DE	IT	NL	NO	PL	PT	RU	ES	SE	TR	UA	GB	IR
		Africa	DZ	0	0	0	0	0	0	0	0	0	0	0	0	0	0	0	0	0	0	0	0	0	0	0	0	0	0	0	0	0	0	0	0	0	0	0	0	0	0	0	0	0	0	0	0	0	0
			AO	0	0	0	0	0	0	0	0	0	0	0	0	0	0	0	0	0	0	0	0	0	0	0	0	0	0	0	0	0	0	0	0	0	0	0	0	0	0	0	0	0	0	0	0	0	0
			EG	0	0	0	0	0	0	0	0	0	0	0	0	0	0	0	0	0	0	0	0	0	0	0	0	0	0	0	0	0	0	0	0	0	0	0	0	0	0	0	0	0	0	0	0	0	0
			GQ	0	0	0	0	0	0	0	0	0	0	0	0	0	0	0	0	0	0	0	0	0	0	0	0	0	0	0	0	0	0	0	0	0	0	0	0	0	0	0	0	0	0	0	0	0	0
			LY	0	0	0	0	0	0	0	0	0	0	0	0	0	0	0	0	0	0	0	0	0	0	0	0	0	0	0	0	0	0	0	0	0	0	0	0	0	0	0	0	0	0	0	0	0	0
			MA	0	0	0	0	0	0	0	0	0	0	0	0	0	0	0	0	0	0	0	0	0	0	0	0	0	0	0	0	0	0	0	0	0	0	0	0	0	0	0	0	0	0	0	0	0	0
			MZ	0	0	0	0	0	0	0	0	0	0	0	0	0	0	0	0	0	0	0	0	0	0	0	0	0	0	0	0	0	0	0	0	0	0	0	0	0	0	0	0	0	0	0	0	0	0
			NA	0	0	0	0	0	0	0	0	0	0	0	0	0	0	0	0	0	0	0	0	0	0	0	0	0	0	0	0	0	0	0	0	0	0	0	0	0	0	0	0	0	0	0	0	0	0
			NG	0	0	0	0	0	0	0	0	0	0	0	0	0	0	0	0	0	0	0	0	0	0	0	0	0	0	0	0	0	0	0	0	0	0	0	0	0	0	0	0	0	0	0	0	0	0
			ZA	0	0	0	0	0	0	0	0	0	0	0	0	0	0	0	0	0	0	0	0	0	0	0	0	0	0	0	0	0	0	0	0	0	0	0	0	0	0	0	0	0	0	0	0	0	0
			TN	0	0	0	0	0	0	0	0	0	0	0	0	0	0	0	0	0	0	0	0	0	0	0	0	0	0	0	0	0	0	0	0	0	0	0	0	0	0	0	0	0	0	0	0	0	0
		Asia-Pacific	AU	0	0	0	0	0	0	0	0	0	0	0	0	0	0	0	0	0	0	0	0	0	0	0	0	0	0	0	0	0	0	0	0	0	0	0	0	0	0	0	0	0	0	0	0	0	0
			BN	0	0	0	0	0	0	0	0	0	0	0	0	0	0	0	0	0	0	0	0	0	0	0	0	0	0	0	0	0	0	0	0	0	0	0	0	0	0	0	0	0	0	0	0	0	0
			CN	0	0	0	0	0	0	0	0	0	0	0	0	0	0	0	0	0	0	0	0	0	0	0	0	0	0	0	0	0	0	0	0	0	0	0	0	0	0	0	0	0	0	0	0	0	0
			IN	0	0	0	0	0	0	0	0	0	0	0	0	0	0	0	0	0	0	0	0	0	0	0	0	0	0	0	0	0	0	0	0	0	0	0	0	0	0	0	0	0	0	0	0	0	0
			ID	0	0	0	0	0	0	0	0	0	0	0	0	0	0	0	0	0	0	0	0	0	0	0	0	0	0	0	0	0	0	0	0	0	0	0	0	0	0	0	0	0	0	0	0	0	0
			JP	0	0	0	0	0	0	0	0	0	0	0	0	0	0	0	0	0	0	0	0	0	0	0	0	0	0	0	0	0	0	0	0	0	0	0	0	0	0	0	0	0	0	0	0	0	0
			KZ	0	0	0	0	0	0	0	0	0	0	0	0	0	0	0	0	0	0	0	0	0	0	0	0	0	0	0	0	0	0	0	0	0	0	0	0	0	0	0	0	0	0	0	0	0	0
			KR	0	0	0	0	0	0	0	0	0	0	0	0	0	0	0	0	0	0	0	0	0	0	0	0	0	0	0	0	0	0	0	0	0	0	0	0	0	0	0	0	0	0	0	0	0	0
			MY	0	0	0	0	0	0	0	0	0	0	0	0	0	0	0	0	0	0	0	0	0	0	0	0	0	0	0	0	0	0	0	0	0	0	0	0	0	0	0	0	0	0	0	0	0	0
			PG	0	0	0	0	0	0	0	0	0	0	0	0	0	0	0	0	0	0	0	0	0	0	0	0	0	0	0	0	0	0	0	0	0	0	0	0	0	0	0	0	0	0	0	0	0	0
			PH	0	0	0	0	0	0	0	0	0	0	0	0	0	0	0	0	0	0	0	0	0	0	0	0	0	0	0	0	0	0	0	0	0	0	0	0	0	0	0	0	0	0	0	0	0	0
			SG	0	0	0	0	0	0	0	0	0	0	0	0	0	0	0	0	0	0	0	0	0	0	0	0	0	0	0	0	0	0	0	0	0	0	0	0	0	0	0	0	0	0	0	0	0	0
			TH	0	0	0	0	0	0	0	0	0	0	0	0	0	0	0	0	0	0	0	0	0	0	0	0	0	0	0	0	0	0	0	0	0	0	0	0	0	0	0	0	0	0	0	0	0	0
			TM	0	0	0	0	0	0	0	0	0	0	0	0	0	0	0	0	0	0	0	0	0	0	0	0	0	0	0	0	0	0	0	0	0	0	0	0	0	0	0	0	0	0	0	0	0	0
			UZ	0	0	0	0	0	0	0	0	0	0	0	0	0	0	0	0	0	0	0	0	0	0	0	0	0	0	0	0	0	0	0	0	0	0	0	0	0	0	0	0	0	0	0	0	0	0
			VN	0	0	0	0	0	0	0	0	0	0	0	0	0	0	0	0	0	0	0	0	0	0	0	0	0	0	0	0	0	0	0	0	0	0	0	0	0	0	0	0	0	0	0	0	0	0
		Europe	AZ	0	0	0	0	0	0	0	0	0	0	0	0	0	0	0	0	0	0	0	0	0	0	0	0	0	0	0	0	0	0	0	0	0	0	0	0	0	0	0	0	0	0	0	0	0	0
			BE	0	0	0	0	0	0	0	0	0	0	0	0	0	0	0	0	0	0	0	0	0	0	0	0	0	0	0	0	0	0	0	0	0	0	0	0	0	0	0	0	0	0	0	0	0	0
			CZ	0	0	0	0	0	0	0	0	0	0	0	0	0	0	0	0	0	0	0	0	0	0	0	0	0	0	0	0	0	0	0	0	0	0	0	0	0	0	0	0	0	0	0	0	0	0
			DK	0	0	0	0	0	0	0	0	0	0	0	0	0	0	0	0	0	0	0	0	0	0	0	0	0	0	0	0	0	0	0	0	0	0	0	0	0	0	0	0	0	0	0	0	0	0
			FI	0	0	0	0	0	0	0	0	0	0	0	0	0	0	0	0	0	0	0	0	0	0	0	0	0	0	0	0	0	0	0	0	0	0	0	0	0	0	0	0	0	0	0	0	0	0
			FR	0	0	0	0	0	0	0	0	0	0	0	0	0	0	0	0	0	0	0	0	0	0	0	0	0	0	0	0	0	0	0	0	0	0	0	0	0	0	0	0	0	0	0	0	0	0
			DE	0	0	0	0	0	0	0	0	0	0	0	0	0	0	0	0	0	0	0	0	0	0	0	0	0	0	0	0	0	0	0	0	0	0	0	0	0	0	0	0	0	0	0	0	0	0
			IT	0	0	0	0	0	0	0	0	0	0	0	0	0	0	0	0	0	0	0	0	0	0	0	0	0	0	0	0	0	0	0	0	0	0	0	0	0	0	0	0	0	0	0	0	0	0
			NL	0	0	0	0	0	0	0	0	0	0	0	0	0	0	0	0	0	0	0	0	0	0	0	0	0	0	0	0	0	0	0	0	0	0	0	0	0	0	0	0	0	0	0	0	0	0
			NO	0	0	0	0	0	0	0	0	0	0	0	0	0	0	0	0	0	0	0	0	0	0	0	0	0	0	0	0	0	0	0	0	0	0	0	0	0	0	0	0	0	0	0	0	0	0
			PL	0	0	0	0	0	0	0	0	0	0	0	0	0	0	0	0	0	0	0	0	0	0	0	0	0	0	0	0	0	0	0	0	0	0	0	0	0	0	0	0	0	0	0	0	0	0
			PT	0	0	0	0	0	0	0	0	0	0	0	0	0	0	0	0	0	0	0	0	0	0	0	0	0	0	0	0	0	0	0	0	0	0	0	0	0	0	0	0	0	0	0	0	0	0
			RU	0	0	0	0	0	0	0	0	0	0	0	0	0	0	0	0	0	0	0	0	0	0	0	0	0	0	0	0	0	0	0	0	0	0	0	0	0	0	0	0	0	0	0	0	0	0
			ES	0	0	0	0	0	0	0	0	0	0	0	0	0	0	0	0	0	0	0	0	0	0	0	0	0	0	0	0	0	0	0	0	0	0	0	0	0	0	0	0	0	0	0	0	0	0
			SE	0	0	0	0	0	0	0	0	0	0	0	0	0	0	0	0	0	0	0	0	0	0	0	0	0	0	0	0	0	0	0	0	0	0	0	0	0	0	0	0	0	0	0	0	0	0
			TR	0	0	0	0	0	0	0	0	0	0	0	0	0	0	0	0	0	0	0	0	0	0	0	0	0	0	0	0	0	0	0	0	0	0	0	0	0	0	0	0	0	0	0	0	0	0
			UA	0	0	0	0	0	0	0	0	0	0	0	0	0	0	0	0	0	0	0	0	0	0	0	0	0	0	0	0	0	0	0	0	0	0	0	0	0	0	0	0	0	0	0	0	0	0
			GB	0	0	0	0	0	0	0	0	0	0	0	0	0	0	0	0	0	0	0	0	0	0	0	0	0	0	0	0	0	0	0	0	0	0	0	0	0	0	0	0	0	0	0	0	0	0
		Middle East	IR	0	0	0	0	0	0	0	0	0	0	0	0	0	0	0	0	0	0	0	0	0	0	0	0	0	0	0	0	0	0	0	0	0	0	0	0	0	0	0	0	0	0	0	0	0	0
			IQ	0	0	0	0	0	0	0	0	0	0	0	0	0	0	0	0	0	0	0	0	0	0	0	0	0	0	0	0	0	0	0	0	0	0	0	0	0	0	0	0	0	0	0	0	0	0
			IL	0	0	0	0	0	0	0	0	0	0	0	0	0	0	0	0	0	0	0	0	0	0	0	0	0	0	0	0	0	0	0	0	0	0	0	0	0	0	0	0	0	0	0	0	0	0
			KW	0	0	0	0	0	0	0	0	0	0	0	0	0	0	0	0	0	0	0	0	0	0	0	0	0	0	0	0	0	0	0	0	0	0	0	0	0	0	0	0	0	0	0	0	0	0
			OM	0	0	0	0	0	0	0	0	0	0	0	0	0	0	0	0	0	0	0	0	0	0	0	0	0	0	0	0	0	0	0	0	0	0	0	0	0	0	0	0	0	0	0	0	0	0
			QA	0	0	0	0	0	0	0	0	0	0	0	0	0	0	0	0	0	0	0	0	0	0	0	0	0	0	0	0	0	0	0	0	0	0	0	0	0	0	0	0	0	0	0	0	0	0
			SA	0	0	0	0	0	0	0	0	0	0	0	0	0	0	0	0	0	0	0	0	0	0	0	0	0	0	0	0	0	0	0	0	0	0	0	0	0	0	0	0	0	0	0	0	0	0
			AE	0	0	0	0	0	0	0	0	0	0	0	0	0	0	0	0	0	0	0	0	0	0	0	0	0	0	0	0	0	0	0	0	0	0	0	0	0	0	0	0	0	0	0	0	0	0
		North America	CA	0	0	0	0	0	0	0	0	0	0	0	0	0	0	0	0	0	0	0	0	0	0	0	0	0	0	0	0	0	0	0	0	0	0	0	0	0	0	0	0	0	0	0	0	0	0
			MX	0	0	0	0	0	0	0	0	0	0	0	0	0	0	0	0	0	0	0	0	0	0	0	0	0	0	0	0	0	0	0	0	0	0	0	0	0	0	0	0	0	0	0	0	0	0
			TT	0	0	0	0	0	0	0	0	0	0	0	0	0	0	0	0	0	0	0	0	0	0	0	0	0	0	0	0	0	0	0	0	0	0	0	0	0	0	0	0	0	0	0	0	0	0
			US	0	0	0	0	0	0	0	0	0	0	0	0	0	0	0	0	0	0	0	0	0	0	0	0	0	0	0	0	0	0	0	0	0	0	0	0	0	0	0	0	0	0	0	0	0	0
		South America	AR	0	0	0	0	0	0	0	0	0	0	0	0	0	0	0	0	0	0	0	0	0	0	0	0	0	0	0	0	0	0	0	0	0	0	0	0	0	0	0	0	0	0	0	0	0	0
			BO	0	0	0	0	0	0	0	0	0	0	0	0	0	0	0	0	0	0	0	0	0	0	0	0	0	0	0	0	0	0	0	0	0	0	0	0	0	0	0	0	0	0	0	0	0	0
			BR	0	0	0	0	0	0	0	0	0	0	0	0	0	0	0	0	0	0	0	0	0	0	0	0	0	0	0	0	0	0	0	0	0	0	0	0	0	0	0	0	0	0	0	0	0	0
			CL	0	0	0	0	0	0	0	0	0	0	0	0	0	0	0	0	0	0	0	0	0	0	0	0	0	0	0	0	0	0	0	0	0	0	0	0	0	0	0	0	0	0	0	0	0	0
			PE	0	0	0	0	0	0	0	0	0	0	0	0	0	0	0	0	0	0	0	0	0	0	0	0	0	0	0	0	0	0	0	0	0	0	0	0	0	0	0	0	0	0	0	0	0	0
			VE	0	0	0	0	0	0	0	0	0	0	0	0	0	0	0	0	0	0	0	0	0	0	0	0	0	0	0	0	0	0	0	0	0	0	0	0	0	0	0	0	0	0	0	0	0	0
	Gray_Grid_MDOship
		GHG [kgCO2e/kgNH3]	Destination	Africa											Asia-Pacific																Europe																		Middle East
		Origin		DZ	AO	EG	GQ	LY	MA	MZ	NA	NG	ZA	TN	AU	BN	CN	IN	ID	JP	KZ	KR	MY	PG	PH	SG	TH	TM	UZ	VN	AZ	BE	CZ	DK	FI	FR	DE	IT	NL	NO	PL	PT	RU	ES	SE	TR	UA	GB	IR
		Africa	DZ	2.61234	2.70345	2.66474	2.70082	2.65702	2.64356	2.7228	2.71479	2.6975	2.75196	2.64776	2.79275	2.77233	2.78692	2.72303	2.77998	2.81148	2.62581	2.80316	2.76651	2.81008	2.78451	2.75671	2.77158	2.62732	2.62648	2.76838	2.6259	2.65705	2.62694	2.66944	2.67861	2.65559	2.66539	2.65819	2.66055	2.66512	2.67929	2.63868	2.81216	2.63607	2.67352	2.65863	2.66555	2.65482	2.72603
			AO	2.21915	2.12977	2.24939	2.15876	2.24194	2.21424	2.20962	2.16095	2.15802	2.19868	2.23281	2.29269	2.28971	2.30593	2.26747	2.28956	2.32988	2.13999	2.32186	2.28344	2.31044	2.30159	2.27924	2.29334	2.1415	2.14065	2.28887	2.14008	2.2286	2.14112	2.24069	2.24961	2.22714	2.23681	2.24292	2.23206	2.23643	2.25049	2.2116	2.33054	2.22023	2.24462	2.24341	2.25021	2.22644	2.27227
			EG	2.56123	2.63058	2.50909	2.62799	2.54609	2.57102	2.58747	2.63561	2.62467	2.61923	2.5501	2.65705	2.63674	2.65124	2.58774	2.64436	2.67565	2.52242	2.66738	2.63095	2.67427	2.64885	2.6212	2.63599	2.52393	2.52309	2.6328	2.52251	2.58441	2.52355	2.59673	2.60586	2.58295	2.59272	2.55199	2.5879	2.59243	2.60658	2.56613	2.67632	2.5552	2.60079	2.53974	2.54725	2.58219	2.5907
			GQ	2.63782	2.57867	2.66875	2.54962	2.66108	2.63254	2.64545	2.59574	2.57128	2.63403	2.65181	2.73026	2.72722	2.74385	2.70443	2.72703	2.76837	2.56304	2.76019	2.72084	2.74844	2.73938	2.71658	2.73099	2.56455	2.56371	2.72644	2.56313	2.64751	2.56417	2.65987	2.66901	2.64605	2.65584	2.66218	2.651	2.65556	2.66971	2.63015	2.76908	2.63902	2.66393	2.66266	2.66967	2.64528	2.70943
			LY	2.83849	2.90895	2.8309	2.90626	2.79377	2.84841	2.88955	2.92042	2.90292	2.92164	2.82577	2.96008	2.93947	2.95422	2.8897	2.94719	2.97902	2.80902	2.97063	2.93362	2.97759	2.95177	2.92374	2.93875	2.81053	2.80968	2.93552	2.80911	2.8621	2.81015	2.8746	2.88388	2.86063	2.87049	2.83356	2.86561	2.87027	2.88447	2.84354	2.97971	2.83244	2.87875	2.82791	2.8349	2.85983	2.89277
			MA	2.86973	2.92521	2.90111	2.9223	2.89329	2.83859	2.95993	2.93669	2.91909	2.974	2.88393	3.03063	3.00997	3.02476	2.96006	3.0177	3.04963	2.85414	3.04122	3.00411	3.04819	3.02231	2.9942	3.00925	2.85565	2.85481	3.00602	2.85423	2.88192	2.85527	2.89444	2.90373	2.88044	2.89031	2.89447	2.88543	2.8901	2.90431	2.86339	3.05033	2.871	2.8986	2.89494	2.90208	2.87964	2.96314
			MZ	2.40903	2.38046	2.3779	2.39496	2.39407	2.41875	2.29957	2.35903	2.39414	2.34298	2.39801	2.41543	2.40443	2.41874	2.37027	2.40523	2.44286	2.30874	2.43467	2.39869	2.43295	2.41639	2.38903	2.40366	2.31025	2.30941	2.40049	2.30883	2.43192	2.30987	2.44412	2.45314	2.43047	2.44018	2.39987	2.4354	2.43984	2.45394	2.41383	2.44351	2.40302	2.44811	2.38775	2.39517	2.42974	2.37476
			NA	2.20462	2.13552	2.22872	2.14997	2.22738	2.1997	2.1629	2.10403	2.14909	2.152	2.21826	2.24584	2.24286	2.25905	2.22066	2.24271	2.28296	2.11254	2.27495	2.2366	2.26355	2.25472	2.23241	2.24648	2.11405	2.1132	2.24201	2.11263	2.21403	2.11367	2.22611	2.23502	2.21258	2.22224	2.22836	2.21749	2.22185	2.23591	2.19705	2.28362	2.2057	2.23003	2.22885	2.23564	2.21189	2.22544
			NG	2.58669	2.53026	2.61754	2.52362	2.60989	2.58156	2.59678	2.54716	2.50175	2.58541	2.60064	2.68138	2.67835	2.69494	2.65563	2.67817	2.71939	2.51387	2.71123	2.67198	2.69951	2.69048	2.66774	2.68211	2.51538	2.51453	2.67756	2.51396	2.59634	2.515	2.60867	2.61779	2.59488	2.60465	2.61098	2.59983	2.60436	2.61851	2.57902	2.7201	2.58787	2.61272	2.61146	2.61844	2.59412	2.66061
			ZA	3.40381	3.3319	3.37389	3.34697	3.39079	3.39825	3.30427	3.30948	3.34618	3.26056	3.39509	3.39596	3.39082	3.40813	3.36511	3.39059	3.43359	3.27867	3.42513	3.38427	3.41486	3.40344	3.37875	3.39411	3.28018	3.27933	3.39014	3.27876	3.41394	3.2798	3.42675	3.43629	3.41245	3.42245	3.3971	3.41748	3.42236	3.43667	3.39585	3.43437	3.40052	3.43105	3.38431	3.39223	3.41158	3.37044
			TN	2.63826	2.70795	2.64405	2.70533	2.63492	2.64809	2.70207	2.71928	2.702	2.73395	2.60271	2.77198	2.75157	2.76615	2.70231	2.75922	2.79069	2.61552	2.78238	2.74576	2.7893	2.76374	2.73596	2.75083	2.61703	2.61618	2.74762	2.61561	2.66157	2.61665	2.67395	2.68312	2.6601	2.6699	2.63922	2.66506	2.66964	2.6838	2.6432	2.79137	2.63242	2.67803	2.63893	2.64585	2.65933	2.7053
		Asia-Pacific	AU	2.7571	2.74322	2.72547	2.75791	2.74187	2.76694	2.69372	2.72148	2.75709	2.70891	2.74592	2.57748	2.63642	2.64589	2.6882	2.62552	2.65643	2.59317	2.65374	2.63618	2.62397	2.63445	2.63512	2.64727	2.59468	2.59384	2.64222	2.59326	2.78044	2.5943	2.79283	2.80201	2.77897	2.78878	2.74782	2.78393	2.78851	2.80268	2.76205	2.66251	2.75106	2.79691	2.7355	2.74307	2.7782	2.70405
			BN	2.68532	2.68876	2.65378	2.70342	2.67014	2.69513	2.63129	2.66708	2.7026	2.65262	2.67417	2.5853	2.5264	2.57231	2.61631	2.56965	2.59278	2.54158	2.58479	2.55548	2.59864	2.56413	2.5606	2.56723	2.54309	2.54224	2.55923	2.54167	2.70857	2.54271	2.72092	2.73007	2.7071	2.71689	2.67606	2.71206	2.71661	2.73077	2.69024	2.59372	2.67928	2.72499	2.66378	2.67132	2.70634	2.63211
			CN	2.7962	2.80178	2.7645	2.81649	2.78093	2.80605	2.74192	2.77999	2.81568	2.76541	2.78499	2.69057	2.66803	2.62159	2.72682	2.67828	2.67361	2.63534	2.66429	2.66985	2.70276	2.65827	2.67075	2.67212	2.63684	2.636	2.66006	2.63543	2.8196	2.63646	2.83201	2.84121	2.81813	2.82794	2.7869	2.82309	2.82769	2.84187	2.80117	2.67317	2.79015	2.83611	2.77455	2.78214	2.81735	2.74272
			IN	2.97788	3.00825	2.9458	3.0231	2.9624	2.98782	2.93772	2.98622	3.02229	2.96932	2.96655	2.97854	2.95756	2.97235	2.86635	2.96554	2.99723	2.88267	2.98882	2.95169	2.99613	2.9699	2.94179	2.95684	2.88418	2.88333	2.95361	2.88276	3.00161	2.8838	3.01417	3.02349	3.00014	3.01002	2.9685	3.00513	3.00983	3.02405	2.98296	2.99793	2.97181	3.01835	2.95599	2.9637	2.99933	2.915
			ID	2.90573	2.90136	2.87384	2.91614	2.89035	2.91563	2.84426	2.87946	2.91533	2.86472	2.89446	2.78587	2.78103	2.79406	2.83615	2.73756	2.81053	2.75372	2.80724	2.78147	2.80187	2.78202	2.7801	2.79268	2.75523	2.75439	2.78763	2.75381	2.9293	2.75485	2.94179	2.95105	2.92783	2.93768	2.89639	2.9328	2.93745	2.95165	2.91076	2.81613	2.89967	2.94592	2.88396	2.89161	2.92703	2.85217
			JP	2.83261	2.83824	2.80088	2.85296	2.81732	2.84246	2.77828	2.81643	2.85214	2.80182	2.82139	2.7129	2.70036	2.68536	2.76316	2.7064	2.63318	2.64632	2.66501	2.70413	2.71928	2.68867	2.70715	2.70763	2.64783	2.64699	2.69744	2.64641	2.85603	2.64745	2.86846	2.87767	2.85456	2.86438	2.8233	2.85953	2.86413	2.87831	2.83758	2.66983	2.82656	2.87256	2.81094	2.81854	2.85378	2.77907
			KZ	2.62909	2.6254	2.62898	2.62906	2.63115	2.63149	2.62403	2.62333	2.62751	2.63436	2.62828	2.63181	2.63121	2.62942	2.63241	2.63229	2.62868	2.61574	2.62782	2.62945	2.63055	2.6307	2.62802	2.62874	2.63129	2.63044	2.62754	2.62987	2.62443	2.6309	2.62503	2.62402	2.62357	2.62789	2.62701	2.6267	2.62287	2.63288	2.6248	2.62744	2.62511	2.62295	2.62791	2.62565	2.62564	2.6285
			KR	2.78219	2.78791	2.75054	2.80261	2.76695	2.79203	2.72799	2.76615	2.80179	2.7516	2.771	2.66837	2.65054	2.63428	2.71292	2.66131	2.62328	2.60378	2.59136	2.65478	2.67863	2.63955	2.65679	2.65712	2.60529	2.60445	2.64689	2.60387	2.80555	2.60491	2.81795	2.82713	2.80408	2.81389	2.77291	2.80905	2.81363	2.8278	2.78715	2.61908	2.77615	2.82204	2.76058	2.76815	2.80331	2.72879
			MY	2.59273	2.59558	2.56135	2.61018	2.57764	2.60251	2.53894	2.57398	2.60936	2.55965	2.58163	2.49872	2.46928	2.48782	2.52407	2.4838	2.51012	2.45369	2.50264	2.44001	2.51493	2.48175	2.46839	2.47746	2.4552	2.45436	2.47113	2.45378	2.61586	2.45482	2.62815	2.63725	2.61439	2.62416	2.58351	2.61934	2.62385	2.63799	2.59761	2.51142	2.58671	2.63219	2.57129	2.57878	2.61364	2.53977
			PG	2.77095	2.75798	2.73932	2.77267	2.75572	2.78079	2.70809	2.73624	2.77185	2.72367	2.75977	2.62056	2.64638	2.65463	2.70206	2.63796	2.65937	2.58851	2.66057	2.6491	2.57385	2.64319	2.6479	2.65999	2.59002	2.58918	2.65268	2.5886	2.79429	2.58964	2.80668	2.81586	2.79282	2.80263	2.76167	2.79778	2.80236	2.81653	2.7759	2.66934	2.76491	2.81077	2.74935	2.75692	2.79205	2.71799
			PH	2.74992	2.7534	2.71829	2.76809	2.73469	2.75975	2.69576	2.73166	2.76728	2.71714	2.73874	2.6355	2.61624	2.6147	2.68071	2.62274	2.63331	2.59311	2.62597	2.62014	2.64765	2.57833	2.62464	2.62578	2.59462	2.59378	2.61568	2.5932	2.77325	2.59424	2.78564	2.79482	2.77179	2.78159	2.74064	2.77675	2.78133	2.79549	2.75487	2.63484	2.74388	2.78973	2.72832	2.73589	2.77102	2.69656
			SG	2.654	2.66237	2.6225	2.67702	2.63884	2.66381	2.60004	2.64071	2.6762	2.62518	2.64286	2.56833	2.54496	2.55934	2.58508	2.55304	2.58383	2.52277	2.57533	2.53897	2.58447	2.55684	2.51022	2.54404	2.52428	2.52344	2.54083	2.52286	2.67722	2.5239	2.68956	2.6987	2.67576	2.68554	2.64475	2.68071	2.68526	2.6994	2.65891	2.58436	2.64797	2.69362	2.63249	2.64001	2.675	2.60086
			TH	2.6207	2.62862	2.58928	2.64324	2.60558	2.63049	2.56685	2.607	2.64242	2.59195	2.60959	2.53256	2.50377	2.51287	2.55195	2.51764	2.53641	2.47576	2.52779	2.50026	2.5486	2.51017	2.49624	2.46264	2.47727	2.47642	2.49276	2.47585	2.64386	2.47689	2.65617	2.66528	2.64239	2.65216	2.61147	2.64734	2.65187	2.66601	2.62559	2.53656	2.61467	2.66022	2.59923	2.60674	2.64164	2.56767
			TM	3.43858	3.43489	3.43847	3.43856	3.44064	3.44098	3.43352	3.43283	3.437	3.44385	3.43777	3.4413	3.4407	3.43891	3.4419	3.44178	3.43817	3.43927	3.43731	3.43894	3.44005	3.44019	3.43751	3.43823	3.42362	3.43993	3.43704	3.43936	3.43392	3.4404	3.43452	3.43351	3.43306	3.43738	3.4365	3.43619	3.43236	3.44237	3.43429	3.43693	3.4346	3.43245	3.43741	3.43514	3.43513	3.438
			UZ	2.77962	2.77592	2.7795	2.77959	2.78167	2.78201	2.77456	2.77386	2.77803	2.78489	2.7788	2.78233	2.78174	2.77994	2.78293	2.78281	2.7792	2.7803	2.77834	2.77997	2.78108	2.78123	2.77855	2.77927	2.78181	2.76565	2.77807	2.78039	2.77495	2.78143	2.77555	2.77454	2.7741	2.77841	2.77754	2.77722	2.77339	2.7834	2.77533	2.77797	2.77563	2.77348	2.77844	2.77618	2.77617	2.77903
			VN	2.5268	2.53332	2.49552	2.54789	2.51176	2.53655	2.47318	2.5118	2.54706	2.49756	2.51573	2.43727	2.40569	2.41076	2.45839	2.42246	2.43603	2.38456	2.42739	2.40381	2.45099	2.40998	2.40292	2.40265	2.38607	2.38522	2.37246	2.38465	2.54982	2.38568	2.56207	2.57113	2.54836	2.5581	2.5176	2.5533	2.55778	2.5719	2.53164	2.43617	2.52078	2.56609	2.50543	2.51289	2.54762	2.47403
		Europe	AZ	2.48961	2.48591	2.48949	2.48958	2.49166	2.492	2.48455	2.48385	2.48802	2.49488	2.48879	2.49232	2.49173	2.48993	2.49292	2.4928	2.48919	2.49029	2.48833	2.48996	2.49107	2.49122	2.48854	2.48926	2.4918	2.49095	2.48806	2.47624	2.48494	2.49142	2.48555	2.48453	2.48409	2.4884	2.48753	2.48721	2.48338	2.49339	2.48532	2.48796	2.48562	2.48347	2.48843	2.48617	2.48616	2.48902
			BE	2.10477	2.15923	2.13488	2.15672	2.12747	2.10338	2.19113	2.17017	2.15345	2.20642	2.11837	2.25927	2.23943	2.25355	2.19159	2.24689	2.27737	2.07002	2.26927	2.23373	2.27607	2.25124	2.22417	2.23864	2.07153	2.07068	2.23549	2.07011	2.06063	2.07115	2.0852	2.09407	2.07306	2.08105	2.12843	2.07639	2.08091	2.09499	2.09176	2.27799	2.10583	2.0891	2.12892	2.13568	2.08208	2.19439
			CZ	2.80732	2.80363	2.80721	2.8073	2.80938	2.80972	2.80226	2.80157	2.80574	2.81259	2.80651	2.81004	2.80944	2.80765	2.81064	2.81052	2.80691	2.80801	2.80605	2.80768	2.80879	2.80893	2.80625	2.80697	2.80952	2.80867	2.80577	2.8081	2.80266	2.79296	2.80326	2.80225	2.8018	2.80612	2.80524	2.80493	2.8011	2.81111	2.80303	2.80567	2.80334	2.80119	2.80615	2.80388	2.80387	2.80673
			DK	2.11895	2.17343	2.14907	2.17092	2.14165	2.11756	2.20534	2.18437	2.16764	2.22063	2.13255	2.2735	2.25365	2.26777	2.2058	2.26111	2.2916	2.07276	2.2835	2.24795	2.2903	2.26547	2.23839	2.25286	2.07427	2.07342	2.24971	2.07285	2.08734	2.07389	2.06287	2.0879	2.08722	2.08753	2.14262	2.08883	2.07836	2.08829	2.10594	2.29223	2.12001	2.08295	2.14311	2.14987	2.09626	2.2086
			FI	2.16609	2.2207	2.19628	2.21817	2.18884	2.1647	2.25267	2.23166	2.21489	2.26798	2.17973	2.32097	2.30108	2.31523	2.25312	2.30855	2.33912	2.10989	2.331	2.29537	2.33781	2.31292	2.28579	2.30029	2.1114	2.11055	2.29714	2.10998	2.13442	2.11102	2.12609	2.10082	2.13431	2.13461	2.18982	2.13592	2.12519	2.1308	2.15307	2.33974	2.16716	2.11555	2.1903	2.19709	2.14336	2.25594
			FR	2.18889	2.24362	2.21914	2.24108	2.21168	2.18748	2.27566	2.25461	2.2378	2.29098	2.20255	2.34409	2.32415	2.33835	2.27609	2.33165	2.36228	2.15456	2.35415	2.31844	2.36097	2.33602	2.30884	2.32337	2.15607	2.15522	2.32022	2.15465	2.15852	2.15569	2.17059	2.17951	2.14584	2.16671	2.21267	2.16196	2.16633	2.18039	2.17584	2.36291	2.18997	2.17452	2.21315	2.21996	2.16617	2.27892
			DE	2.45462	2.51018	2.4853	2.50754	2.47771	2.45317	2.54269	2.52135	2.50424	2.55807	2.46849	2.61197	2.59177	2.60618	2.54301	2.59935	2.63047	2.41434	2.62224	2.58599	2.62911	2.60381	2.57628	2.59101	2.41585	2.415	2.58782	2.41443	2.42221	2.41546	2.42663	2.43568	2.42242	2.40195	2.47877	2.42387	2.42232	2.43645	2.44146	2.63113	2.45578	2.43064	2.47925	2.48618	2.43158	2.54593
			IT	2.65841	2.72811	2.65568	2.72549	2.65235	2.66821	2.71373	2.73946	2.72216	2.74562	2.64894	2.78367	2.76325	2.77784	2.71396	2.7709	2.80239	2.62396	2.79408	2.75744	2.801	2.77543	2.74764	2.76251	2.62547	2.62462	2.7593	2.62405	2.68171	2.62509	2.69409	2.70327	2.68024	2.69004	2.61219	2.6852	2.68978	2.70394	2.66332	2.80307	2.65191	2.69818	2.64913	2.65607	2.67947	2.71696
			NL	2.29608	2.35115	2.32651	2.34857	2.31899	2.29466	2.38338	2.36221	2.34528	2.39872	2.30983	2.45215	2.43211	2.44639	2.38376	2.43964	2.47047	2.25974	2.4623	2.42637	2.46914	2.44405	2.41673	2.43134	2.26125	2.26041	2.42817	2.25983	2.26397	2.26087	2.27438	2.28335	2.2641	2.27034	2.32001	2.2484	2.26998	2.28419	2.28299	2.47111	2.29719	2.27834	2.32049	2.32735	2.2732	2.38664
			NO	1.8629	1.91659	1.89261	1.91416	1.88533	1.86157	1.94804	1.92735	1.91091	1.96326	1.87631	2.01537	1.99578	2.00968	1.9486	2.00316	2.03317	1.81945	2.02517	1.99014	2.03192	2.00743	1.98069	1.99497	1.82096	1.82012	1.99185	1.81954	1.83162	1.82058	1.827	1.83551	1.83153	1.83188	1.88622	1.83304	1.81146	1.83654	1.85001	2.03377	1.86389	1.83061	1.88671	1.89336	1.84048	1.95132
			PL	2.89268	2.94959	2.92406	2.94681	2.91625	2.89114	2.98288	2.96107	2.94347	2.99838	2.90689	3.05358	3.03292	3.04771	2.98301	3.04065	3.07257	2.84239	3.06417	3.02705	3.07114	3.04525	3.01715	3.0322	2.8439	2.84306	3.02897	2.84248	2.85996	2.84352	2.85073	2.85527	2.85987	2.86002	2.91742	2.86142	2.85043	2.82571	2.87932	3.07328	2.89395	2.85016	2.91789	2.92504	2.8692	2.98609
			PT	2.56281	2.6197	2.59369	2.61704	2.58603	2.5614	2.65149	2.63094	2.61373	2.66783	2.57677	2.72119	2.70085	2.71537	2.65175	2.70848	2.73983	2.54575	2.73155	2.69505	2.73845	2.71298	2.68528	2.7001	2.54725	2.54641	2.6969	2.54584	2.56788	2.54687	2.58021	2.58934	2.56641	2.57619	2.58712	2.57137	2.57591	2.59005	2.53583	2.7405	2.564	2.58427	2.5876	2.5946	2.56566	2.65473
			RU	2.57043	2.57596	2.53913	2.59053	2.55538	2.58018	2.51678	2.55443	2.58971	2.54017	2.55936	2.45775	2.4403	2.42411	2.50198	2.45081	2.40921	2.38486	2.40029	2.44436	2.46788	2.42933	2.44655	2.44664	2.38637	2.38553	2.43658	2.38495	2.59346	2.38599	2.60572	2.61479	2.592	2.60175	2.56122	2.59694	2.60143	2.61555	2.57528	2.37285	2.5644	2.60974	2.54904	2.55651	2.59126	2.51762
			ES	2.43188	2.49969	2.45426	2.49713	2.44667	2.44052	2.51163	2.51088	2.49383	2.54329	2.43766	2.5809	2.5607	2.57511	2.51195	2.56828	2.59939	2.41784	2.59116	2.55492	2.59803	2.57274	2.54522	2.55994	2.41935	2.4185	2.55675	2.41793	2.45378	2.41897	2.46604	2.4751	2.45232	2.46207	2.4473	2.45727	2.46175	2.47587	2.43561	2.60005	2.40773	2.47006	2.44821	2.45503	2.45159	2.51488
			SE	1.9417	1.99561	1.97152	1.99316	1.9642	1.94035	2.02719	2.00642	1.9899	2.04243	1.95516	2.09476	2.0751	2.08906	2.02773	2.0825	2.11265	1.89008	2.10462	2.06944	2.11138	2.08679	2.05995	2.07429	1.89159	1.89074	2.07116	1.89017	1.91035	1.8912	1.90214	1.89662	1.91023	1.91058	1.96512	1.91185	1.90123	1.90689	1.92878	2.11325	1.94271	1.88198	1.96561	1.97229	1.9192	2.03046
			TR	2.62421	2.69382	2.60875	2.6912	2.61214	2.63403	2.66668	2.70514	2.68788	2.69852	2.61403	2.73649	2.71611	2.73067	2.66692	2.72375	2.75517	2.59029	2.74687	2.7103	2.75378	2.72827	2.70052	2.71537	2.5918	2.59095	2.71216	2.59038	2.64749	2.59142	2.65986	2.66901	2.64603	2.65582	2.6145	2.65098	2.65555	2.6697	2.62914	2.75585	2.61817	2.66393	2.5778	2.60574	2.64526	2.66991
			UA	2.30761	2.37609	2.29305	2.37358	2.29577	2.31742	2.34991	2.38718	2.37029	2.38139	2.29759	2.41867	2.39863	2.41291	2.35029	2.40616	2.43698	2.26533	2.42881	2.39289	2.43565	2.41057	2.38325	2.39786	2.26684	2.26599	2.39469	2.26542	2.33053	2.26645	2.3427	2.35168	2.32908	2.33878	2.29805	2.334	2.33842	2.35251	2.3125	2.43762	2.30161	2.34667	2.28265	2.25484	2.32836	2.35316
			GB	2.21566	2.27048	2.24596	2.26793	2.23849	2.21425	2.30258	2.2815	2.26465	2.3179	2.22935	2.3711	2.35114	2.36535	2.303	2.35864	2.38933	2.18405	2.38119	2.34541	2.38801	2.36303	2.33581	2.35036	2.18556	2.18471	2.3472	2.18414	2.19502	2.18518	2.20712	2.21606	2.19362	2.20324	2.23948	2.19848	2.20286	2.21693	2.2026	2.38996	2.21675	2.21106	2.23997	2.24679	2.17361	2.30584
		Middle East	IR	2.58971	2.6214	2.55828	2.63602	2.57459	2.5995	2.55188	2.59977	2.6352	2.58344	2.57859	2.60321	2.58263	2.5971	2.52515	2.59047	2.62145	2.48965	2.6132	2.57685	2.62049	2.59471	2.56711	2.58188	2.49116	2.49032	2.57869	2.48974	2.61287	2.49078	2.62518	2.6343	2.61141	2.62118	2.58048	2.61636	2.62088	2.63502	2.5946	2.62212	2.58368	2.62923	2.56824	2.57575	2.61065	2.47672
			IQ	2.96086	2.99325	2.92882	3.00808	2.9454	2.9708	2.92239	2.97123	3.00728	2.95437	2.94955	2.97457	2.9536	2.96839	2.895	2.96158	2.99323	2.85929	2.98484	2.94774	2.99222	2.96593	2.93785	2.95288	2.8608	2.85995	2.94965	2.85938	2.98457	2.86042	2.99711	3.00642	2.98309	2.99297	2.95149	2.98808	2.99277	3.00699	2.96593	2.99394	2.95479	3.00128	2.939	2.94669	2.98228	2.86834
			IL	2.30132	2.36971	2.2709	2.3672	2.28662	2.31105	2.32773	2.3752	2.36391	2.3592	2.29049	2.39646	2.37643	2.39071	2.32812	2.38396	2.41477	2.26146	2.4066	2.3707	2.41343	2.38837	2.36106	2.37566	2.26297	2.26213	2.37249	2.26156	2.32416	2.26259	2.33632	2.34531	2.32271	2.33241	2.29193	2.32763	2.33205	2.34614	2.30613	2.41541	2.29532	2.34029	2.27946	2.28682	2.32199	2.33099
			KW	2.50948	2.54102	2.47818	2.55559	2.49443	2.51923	2.47178	2.51947	2.55477	2.50326	2.4984	2.52293	2.50244	2.51683	2.4452	2.51025	2.54108	2.41062	2.53286	2.49667	2.54013	2.51447	2.48697	2.50167	2.41213	2.41129	2.49849	2.41072	2.53252	2.41175	2.54478	2.55385	2.53106	2.54081	2.50027	2.536	2.54049	2.55461	2.51433	2.54174	2.50345	2.5488	2.48809	2.49556	2.53032	2.41978
			OM	2.38664	2.41797	2.35553	2.43248	2.37169	2.39636	2.34915	2.39654	2.43166	2.38049	2.37563	2.40023	2.37986	2.39416	2.32404	2.38763	2.41826	2.30105	2.41008	2.37411	2.41725	2.39181	2.36446	2.37909	2.30256	2.30171	2.37592	2.30114	2.40952	2.30218	2.42171	2.43072	2.40806	2.41778	2.37748	2.41299	2.41743	2.43153	2.39144	2.4189	2.38063	2.4257	2.36538	2.37278	2.40734	2.32127
			QA	2.36357	2.39484	2.3325	2.40934	2.34865	2.37327	2.32612	2.37344	2.40851	2.35743	2.35257	2.37694	2.3566	2.37087	2.2998	2.36436	2.39493	2.26944	2.38677	2.35086	2.394	2.36853	2.34122	2.35582	2.27095	2.2701	2.35266	2.26953	2.3864	2.27057	2.39858	2.40757	2.38494	2.39465	2.35442	2.38987	2.3943	2.40839	2.36835	2.39558	2.35756	2.40255	2.34233	2.34973	2.38422	2.28333
			SA	2.53868	2.60792	2.50727	2.60533	2.52357	2.54846	2.54478	2.59284	2.60202	2.57651	2.52757	2.61425	2.59398	2.60845	2.54507	2.60159	2.63281	2.48987	2.62456	2.5882	2.63144	2.60607	2.57846	2.59323	2.49138	2.49054	2.59004	2.48996	2.56182	2.491	2.57413	2.58323	2.56036	2.57012	2.52945	2.56531	2.56983	2.58396	2.54357	2.63348	2.53265	2.57817	2.51722	2.52472	2.55961	2.54802
			AE	2.41932	2.4507	2.38817	2.46523	2.40435	2.42904	2.38178	2.42924	2.4644	2.41315	2.40829	2.43272	2.41232	2.42664	2.35537	2.4201	2.45078	2.32514	2.44259	2.40657	2.44984	2.42429	2.39691	2.41155	2.32665	2.3258	2.40838	2.32523	2.44223	2.32626	2.45445	2.46347	2.44078	2.4505	2.41015	2.44571	2.45016	2.46427	2.42413	2.45143	2.41331	2.45844	2.39803	2.40545	2.44005	2.34066
		North America	CA	2.19277	2.23176	2.223	2.22935	2.21555	2.19001	2.27949	2.24274	2.22607	2.27902	2.20643	2.34788	2.32796	2.34214	2.27992	2.33545	2.33361	2.13899	2.33955	2.32224	2.34375	2.33982	2.31265	2.32717	2.1405	2.13965	2.32402	2.13908	2.18364	2.14011	2.18958	2.19849	2.18228	2.19026	2.21653	2.1871	2.18459	2.19938	2.18031	2.33308	2.19385	2.1935	2.21702	2.22382	2.17876	2.28275
			MX	2.4855	2.51044	2.51615	2.50813	2.50856	2.48236	2.56024	2.5168	2.50483	2.54899	2.49935	2.59348	2.60285	2.59037	2.57381	2.60409	2.56063	2.38482	2.56665	2.607	2.57088	2.59357	2.60706	2.61224	2.38633	2.38549	2.59847	2.38491	2.48054	2.38595	2.48754	2.49659	2.47917	2.4882	2.50962	2.48402	2.48252	2.49737	2.4732	2.56011	2.48665	2.49155	2.5101	2.51703	2.47589	2.57674
			TT	2.42332	2.4358	2.45391	2.43418	2.44635	2.41921	2.4844	2.44104	2.43089	2.4732	2.43715	2.55146	2.56006	2.54835	2.51145	2.56205	2.51867	2.3493	2.52468	2.5543	2.5289	2.55154	2.54461	2.55929	2.35081	2.34997	2.55612	2.34939	2.42486	2.35043	2.43532	2.44436	2.4234	2.43313	2.44739	2.42834	2.43031	2.44515	2.41269	2.51815	2.42446	2.43932	2.44787	2.45477	2.42147	2.51436
			US	2.55545	2.58093	2.58622	2.57858	2.5786	2.55227	2.63232	2.58818	2.57527	2.62099	2.56936	2.66648	2.6759	2.66337	2.64409	2.67714	2.63352	2.45602	2.63957	2.68006	2.6438	2.66658	2.67748	2.68533	2.45753	2.45669	2.67151	2.45611	2.55048	2.45715	2.5575	2.56659	2.5491	2.55815	2.57967	2.55396	2.55247	2.56733	2.5431	2.63301	2.55662	2.56153	2.58015	2.58711	2.5458	2.64704
		South America	AR	2.51583	2.48794	2.54652	2.49527	2.53892	2.51138	2.50929	2.47619	2.49302	2.49804	2.5297	2.57792	2.59044	2.60693	2.56785	2.59027	2.59687	2.40204	2.60329	2.5841	2.55766	2.59616	2.57987	2.59416	2.40354	2.4027	2.58964	2.40213	2.52497	2.40316	2.53723	2.5463	2.52351	2.53326	2.53998	2.52845	2.53294	2.54706	2.50798	2.60648	2.51699	2.54125	2.54046	2.5474	2.52262	2.57278
			BO	2.25597	2.25227	2.25585	2.25594	2.25802	2.25836	2.25091	2.25021	2.25438	2.26124	2.25516	2.25868	2.25809	2.25629	2.25928	2.25916	2.25555	2.25665	2.25469	2.25632	2.25743	2.25758	2.2549	2.25562	2.25816	2.25732	2.25442	2.25674	2.2513	2.25778	2.25191	2.25089	2.25045	2.25476	2.25389	2.25357	2.24974	2.25975	2.25168	2.25432	2.25198	2.24983	2.25479	2.25253	2.25252	2.25538
			BR	2.34903	2.32621	2.37947	2.33127	2.37195	2.34461	2.35811	2.32037	2.32863	2.34703	2.36278	2.44171	2.43871	2.45505	2.4163	2.43854	2.47771	2.26118	2.47111	2.4324	2.4379	2.45067	2.42819	2.44238	2.26269	2.26185	2.43788	2.26127	2.35806	2.26231	2.37022	2.37921	2.3566	2.3663	2.37297	2.36153	2.36595	2.38004	2.34124	2.47985	2.35014	2.3742	2.37345	2.38032	2.35566	2.42116
			CL	2.69673	2.67868	2.8231	2.68792	2.72001	2.69487	2.78098	2.66588	2.68539	2.78794	2.71073	2.72487	2.7507	2.75455	2.79107	2.74227	2.73483	2.55607	2.74642	2.75342	2.7022	2.74339	2.74807	2.76185	2.55758	2.55673	2.75729	2.55616	2.69531	2.5572	2.70382	2.71297	2.69394	2.70364	2.72111	2.6988	2.69877	2.71366	2.68523	2.7388	2.69793	2.70789	2.72159	2.7286	2.69086	2.80679
			PE	2.38609	2.40208	2.54294	2.40033	2.40903	2.38429	2.50139	2.39664	2.39704	2.5084	2.39986	2.44331	2.46544	2.46052	2.51145	2.46099	2.43099	2.26859	2.43733	2.46893	2.42094	2.45627	2.46904	2.47928	2.2701	2.26925	2.46925	2.26868	2.38461	2.26971	2.393	2.40199	2.38325	2.39286	2.41005	2.38809	2.38799	2.40281	2.37469	2.43227	2.38721	2.39697	2.41054	2.41741	2.38025	2.52688
			VE	2.60149	2.61412	2.63236	2.61245	2.6247	2.59731	2.66318	2.61942	2.60913	2.65178	2.61545	2.73081	2.7395	2.7277	2.69041	2.7415	2.69774	2.52644	2.70381	2.7337	2.70805	2.73091	2.72393	2.73875	2.52795	2.5271	2.73555	2.52653	2.60308	2.52756	2.61364	2.62276	2.60162	2.6114	2.62579	2.60657	2.6086	2.62348	2.59079	2.69723	2.60267	2.61769	2.62627	2.63327	2.59964	2.69339
	Gray_Grid_MDONH3ship
		GHG [kgCO2e/kgNH3]	Destination	Africa											Asia-Pacific																Europe																		Middle East
		Origin		DZ	AO	EG	GQ	LY	MA	MZ	NA	NG	ZA	TN	AU	BN	CN	IN	ID	JP	KZ	KR	MY	PG	PH	SG	TH	TM	UZ	VN	AZ	BE	CZ	DK	FI	FR	DE	IT	NL	NO	PL	PT	RU	ES	SE	TR	UA	GB	IR
		Africa	DZ	2.61234	2.69697	2.66162	2.69484	2.65469	2.64233	2.71467	2.70724	2.69166	2.74234	2.64593	2.77968	2.76084	2.77413	2.71555	2.76797	2.79668	2.62581	2.78896	2.75534	2.79554	2.77201	2.74621	2.75996	2.62732	2.62648	2.75691	2.6259	2.65419	2.62694	2.66563	2.67399	2.65277	2.66213	2.65544	2.65758	2.66149	2.67532	2.6373	2.79721	2.63492	2.66922	2.65591	2.6621	2.65222	2.718
			AO	2.21267	2.12977	2.24044	2.15721	2.23377	2.20835	2.2035	2.15875	2.1564	2.1943	2.22515	2.28044	2.27765	2.2924	2.25732	2.2776	2.31434	2.13999	2.30691	2.27174	2.29664	2.28852	2.26778	2.28079	2.1415	2.14065	2.27658	2.14008	2.22097	2.14112	2.23212	2.24023	2.21956	2.22879	2.23433	2.22433	2.22803	2.24176	2.20539	2.31485	2.21334	2.23556	2.23486	2.24092	2.21909	2.26141
			EG	2.55811	2.62162	2.50909	2.61953	2.54435	2.56731	2.58185	2.62609	2.61636	2.6119	2.54781	2.64649	2.62776	2.64096	2.58277	2.63485	2.66336	2.52242	2.65568	2.62229	2.66224	2.63886	2.6132	2.62687	2.52393	2.52309	2.62384	2.52251	2.57907	2.52355	2.59045	2.59877	2.57765	2.58699	2.54944	2.58246	2.58632	2.60014	2.56227	2.66387	2.55224	2.59402	2.53825	2.54498	2.57712	2.58518
			GQ	2.63184	2.57711	2.6603	2.54962	2.65341	2.62717	2.63846	2.59266	2.57048	2.62877	2.64465	2.71713	2.71428	2.72945	2.69341	2.7142	2.75196	2.56304	2.74436	2.70827	2.73376	2.72543	2.70424	2.71756	2.56455	2.56371	2.71327	2.56313	2.64039	2.56417	2.6518	2.66014	2.63897	2.64832	2.65409	2.64378	2.64767	2.66149	2.62444	2.75251	2.63262	2.65538	2.6546	2.66087	2.63843	2.6977
			LY	2.83615	2.90078	2.82916	2.89859	2.79377	2.84549	2.8828	2.91119	2.89539	2.91318	2.82437	2.94839	2.92936	2.94281	2.8836	2.93655	2.96559	2.80902	2.9578	2.92383	2.96443	2.94065	2.91461	2.9285	2.81053	2.80968	2.92543	2.80911	2.85754	2.81015	2.86911	2.87757	2.85612	2.86554	2.83145	2.86095	2.86494	2.87882	2.84047	2.96614	2.83027	2.87276	2.82632	2.83258	2.85555	2.88611
			MA	2.86849	2.91932	2.8974	2.91693	2.89037	2.83859	2.95121	2.92974	2.91385	2.96499	2.88152	3.01698	2.99789	3.01138	2.95199	3.0051	3.03424	2.85414	3.02643	2.99235	3.03306	3.00922	2.98311	2.99703	2.85565	2.85481	2.99396	2.85423	2.87936	2.85527	2.89094	2.89943	2.87793	2.88736	2.89113	2.88277	2.88678	2.90066	2.86232	3.03479	2.86935	2.89461	2.89163	2.89804	2.87735	2.95452
			MZ	2.4009	2.37434	2.37228	2.38797	2.38732	2.41003	2.29957	2.35448	2.38709	2.34062	2.39071	2.40701	2.39685	2.40986	2.36555	2.39767	2.43197	2.30874	2.42437	2.39142	2.42301	2.4078	2.38243	2.39594	2.31025	2.30941	2.39293	2.30883	2.42157	2.30987	2.43284	2.44104	2.42016	2.42944	2.39231	2.42495	2.42873	2.4425	2.40497	2.43246	2.39506	2.43634	2.38125	2.38788	2.41966	2.36936
			NA	2.19708	2.13332	2.2192	2.14688	2.21815	2.19275	2.15835	2.10403	2.14596	2.14918	2.20954	2.23515	2.23237	2.24709	2.21207	2.23232	2.26898	2.11254	2.26156	2.22647	2.25132	2.24321	2.22251	2.23549	2.11405	2.1132	2.23129	2.11263	2.20534	2.11367	2.21648	2.22458	2.20394	2.21316	2.21871	2.2087	2.21239	2.22612	2.18977	2.26949	2.19774	2.21991	2.21923	2.22528	2.20347	2.21615
			NG	2.58085	2.52864	2.60922	2.52283	2.60236	2.57632	2.58973	2.54402	2.50175	2.58009	2.59362	2.66819	2.66536	2.68048	2.64454	2.66528	2.70292	2.51387	2.69534	2.65936	2.68478	2.67648	2.65533	2.66862	2.51538	2.51453	2.66434	2.51396	2.58936	2.515	2.60074	2.60905	2.58794	2.59728	2.60303	2.59275	2.59661	2.61043	2.57345	2.70347	2.58162	2.60431	2.60354	2.60979	2.58741	2.64881
			ZA	3.39419	3.32752	3.36656	3.34171	3.38233	3.38924	3.30191	3.30667	3.34086	3.26056	3.38607	3.38715	3.38235	3.3982	3.35872	3.38222	3.42165	3.27867	3.41378	3.37617	3.4045	3.39397	3.37097	3.3852	3.28018	3.27933	3.38145	3.27876	3.40318	3.2798	3.41505	3.42378	3.40174	3.41131	3.38784	3.40662	3.41083	3.42482	3.38651	3.42227	3.39084	3.41887	3.3761	3.38323	3.4011	3.36334
			TN	2.63643	2.70029	2.64176	2.69817	2.63353	2.64567	2.69477	2.71056	2.69498	2.72493	2.60271	2.75974	2.74091	2.75419	2.69565	2.74803	2.77672	2.61552	2.769	2.73541	2.77559	2.75207	2.72628	2.74003	2.61703	2.61618	2.73698	2.61561	2.65752	2.61665	2.66896	2.67732	2.6561	2.66547	2.63715	2.66092	2.66482	2.67865	2.64064	2.77725	2.63074	2.67255	2.63696	2.64315	2.65556	2.6981
		Asia-Pacific	AU	2.74404	2.73097	2.71492	2.74478	2.73018	2.75328	2.6853	2.71079	2.7439	2.7001	2.73368	2.57748	2.63313	2.6417	2.68088	2.62318	2.65135	2.59317	2.6488	2.63276	2.62162	2.63128	2.63168	2.64292	2.59468	2.59384	2.63818	2.59326	2.76515	2.5943	2.7766	2.78497	2.76373	2.7731	2.73533	2.76855	2.77246	2.78629	2.74825	2.65685	2.73816	2.7802	2.72406	2.73085	2.76318	2.69516
			BN	2.67383	2.6767	2.6448	2.69048	2.66002	2.68305	2.62371	2.65658	2.6896	2.64416	2.6635	2.58201	2.5264	2.56987	2.61059	2.56764	2.58864	2.54158	2.58122	2.55439	2.59419	2.56244	2.55898	2.56513	2.54309	2.54224	2.55768	2.54167	2.69485	2.54271	2.70627	2.71461	2.69344	2.70279	2.66514	2.69825	2.70213	2.71596	2.67801	2.58941	2.66795	2.70985	2.65391	2.66067	2.6929	2.62482
			CN	2.78341	2.78826	2.75422	2.80209	2.76951	2.79267	2.73304	2.76803	2.80122	2.75548	2.77303	2.68638	2.66559	2.62159	2.7198	2.67511	2.67052	2.63534	2.66187	2.66712	2.6975	2.65656	2.66783	2.66915	2.63684	2.636	2.65796	2.63543	2.80458	2.63646	2.81606	2.82445	2.80316	2.81254	2.77469	2.80798	2.81191	2.82575	2.78764	2.67002	2.77752	2.81967	2.76339	2.77019	2.80261	2.73412
			IN	2.9704	2.9981	2.94083	3.01208	2.9563	2.97975	2.93299	2.97763	3.01121	2.96293	2.9599	2.97122	2.95184	2.96533	2.86635	2.95928	2.9882	2.88267	2.98038	2.94629	2.98733	2.96317	2.93705	2.95098	2.88418	2.88333	2.94791	2.88276	2.99191	2.8838	3.00353	3.01204	2.99048	2.99993	2.96159	2.99532	2.99935	3.01325	2.97475	2.98875	2.96449	3.00721	2.95014	2.95706	2.9899	2.91241
			ID	2.89372	2.8894	2.86434	2.90331	2.87972	2.90302	2.8367	2.86906	2.90244	2.85636	2.88328	2.78353	2.77903	2.79089	2.82989	2.73756	2.806	2.75372	2.8029	2.77929	2.79817	2.7799	2.77792	2.78956	2.75523	2.75439	2.78482	2.75381	2.91506	2.75485	2.92661	2.93506	2.91364	2.92305	2.88495	2.91847	2.92245	2.93632	2.89801	2.81106	2.88782	2.93026	2.87357	2.88044	2.91307	2.84434
			JP	2.81781	2.8227	2.78859	2.83655	2.80389	2.82707	2.76739	2.80245	2.83567	2.78988	2.80742	2.70781	2.69622	2.68227	2.75413	2.70187	2.63318	2.64632	2.66341	2.69955	2.71359	2.68542	2.70222	2.70272	2.64783	2.64699	2.69324	2.64641	2.83901	2.64745	2.85049	2.85889	2.83758	2.84697	2.80908	2.84241	2.84634	2.86019	2.82205	2.66782	2.81192	2.85411	2.79777	2.80458	2.83703	2.76847
			KZ	2.62909	2.6254	2.62898	2.62906	2.63115	2.63149	2.62403	2.62333	2.62751	2.63436	2.62828	2.63181	2.63121	2.62942	2.63241	2.63229	2.62868	2.61574	2.62782	2.62945	2.63055	2.6307	2.62802	2.62874	2.63129	2.63044	2.62754	2.62987	2.62443	2.6309	2.62503	2.62402	2.62357	2.62789	2.62701	2.6267	2.62287	2.63288	2.6248	2.62744	2.62511	2.62295	2.62791	2.62565	2.62564	2.6285
			KR	2.76799	2.77296	2.73884	2.78678	2.75412	2.77724	2.71769	2.75276	2.7859	2.74025	2.75762	2.66343	2.64697	2.63186	2.70448	2.65697	2.62168	2.60378	2.59136	2.65073	2.67278	2.63681	2.65247	2.65283	2.60529	2.60445	2.64332	2.60387	2.78912	2.60491	2.80058	2.80896	2.7877	2.79707	2.75927	2.79252	2.79643	2.81027	2.77221	2.61771	2.76211	2.80418	2.748	2.75479	2.78715	2.71878
			MY	2.58157	2.58388	2.55269	2.59761	2.56784	2.59075	2.53168	2.56386	2.59673	2.55156	2.57129	2.49531	2.46819	2.48509	2.51867	2.48162	2.50554	2.45369	2.49859	2.44001	2.51012	2.47961	2.46711	2.47551	2.4552	2.45436	2.46959	2.45378	2.60246	2.45482	2.61382	2.62211	2.60105	2.61037	2.57292	2.60585	2.60969	2.6235	2.58571	2.50664	2.5757	2.61737	2.56175	2.56846	2.60052	2.5328
			PG	2.75641	2.74418	2.72729	2.75799	2.74256	2.76566	2.69815	2.72401	2.75712	2.71331	2.74606	2.61821	2.64193	2.64937	2.69327	2.63426	2.65368	2.58851	2.65471	2.64429	2.57385	2.63895	2.64307	2.65425	2.59002	2.58918	2.64743	2.5886	2.77753	2.58964	2.78898	2.79735	2.77611	2.78548	2.74771	2.78092	2.78483	2.79867	2.76063	2.66276	2.75053	2.79257	2.73644	2.74322	2.77556	2.70762
			PH	2.73742	2.74034	2.7083	2.75415	2.72357	2.74667	2.68716	2.72016	2.75327	2.70767	2.72707	2.63232	2.61455	2.61299	2.67398	2.62062	2.63006	2.59311	2.62324	2.618	2.64341	2.57833	2.62203	2.62314	2.59462	2.59378	2.61374	2.5932	2.75853	2.59424	2.76998	2.77835	2.75711	2.76648	2.72872	2.76193	2.76584	2.77967	2.74164	2.63137	2.73154	2.77358	2.71745	2.72423	2.75657	2.68826
			SG	2.6435	2.65091	2.61451	2.66467	2.62971	2.65271	2.59344	2.63081	2.6638	2.6174	2.63319	2.56489	2.54334	2.55643	2.58035	2.55086	2.5789	2.52277	2.57101	2.53768	2.57964	2.55423	2.51022	2.54229	2.52428	2.52344	2.53924	2.52286	2.66449	2.5239	2.6759	2.68422	2.66308	2.67242	2.63482	2.66788	2.67176	2.68558	2.64768	2.57929	2.63763	2.67947	2.62361	2.63035	2.66254	2.59455
			TH	2.60907	2.61606	2.58015	2.62981	2.59533	2.61827	2.55913	2.59601	2.62892	2.58305	2.59878	2.52821	2.50168	2.50991	2.54609	2.51452	2.5315	2.47576	2.5235	2.49831	2.54286	2.50752	2.4945	2.46264	2.47727	2.47642	2.49126	2.47585	2.63	2.47689	2.64138	2.64968	2.62859	2.63792	2.60041	2.63339	2.63725	2.65106	2.61323	2.53154	2.60321	2.64494	2.58923	2.59595	2.62806	2.56025
			TM	3.43858	3.43489	3.43847	3.43856	3.44064	3.44098	3.43352	3.43283	3.437	3.44385	3.43777	3.4413	3.4407	3.43891	3.4419	3.44178	3.43817	3.43927	3.43731	3.43894	3.44005	3.44019	3.43751	3.43823	3.42362	3.43993	3.43704	3.43936	3.43392	3.4404	3.43452	3.43351	3.43306	3.43738	3.4365	3.43619	3.43236	3.44237	3.43429	3.43693	3.4346	3.43245	3.43741	3.43514	3.43513	3.438
			UZ	2.77962	2.77592	2.7795	2.77959	2.78167	2.78201	2.77456	2.77386	2.77803	2.78489	2.7788	2.78233	2.78174	2.77994	2.78293	2.78281	2.7792	2.7803	2.77834	2.77997	2.78108	2.78123	2.77855	2.77927	2.78181	2.76565	2.77807	2.78039	2.77495	2.78143	2.77555	2.77454	2.7741	2.77841	2.77754	2.77722	2.77339	2.7834	2.77533	2.77797	2.77563	2.77348	2.77844	2.77618	2.77617	2.77903
			VN	2.51533	2.52103	2.48656	2.53472	2.50167	2.52449	2.46562	2.50107	2.53384	2.48886	2.50509	2.43323	2.40414	2.40866	2.4527	2.41965	2.43183	2.38456	2.42382	2.40227	2.44574	2.40804	2.40134	2.40115	2.38607	2.38522	2.37246	2.38465	2.53612	2.38568	2.54744	2.55569	2.53471	2.54402	2.50671	2.53951	2.54332	2.55711	2.51944	2.43186	2.50947	2.55097	2.49559	2.50226	2.5342	2.46676
		Europe	AZ	2.48961	2.48591	2.48949	2.48958	2.49166	2.492	2.48455	2.48385	2.48802	2.49488	2.48879	2.49232	2.49173	2.48993	2.49292	2.4928	2.48919	2.49029	2.48833	2.48996	2.49107	2.49122	2.48854	2.48926	2.4918	2.49095	2.48806	2.47624	2.48494	2.49142	2.48555	2.48453	2.48409	2.4884	2.48753	2.48721	2.48338	2.49339	2.48532	2.48796	2.48562	2.48347	2.48843	2.48617	2.48616	2.48902
			BE	2.1019	2.1516	2.12954	2.14959	2.12291	2.10082	2.18078	2.16147	2.14646	2.19566	2.11432	2.24399	2.22571	2.23853	2.18189	2.23265	2.26035	2.07002	2.25284	2.22034	2.2593	2.23652	2.21144	2.22478	2.07153	2.07068	2.2218	2.07011	2.06063	2.07115	2.0836	2.09166	2.07234	2.08002	2.12345	2.07565	2.07949	2.09323	2.08961	2.26082	2.10254	2.08701	2.12397	2.13	2.08079	2.18414
			CZ	2.80732	2.80363	2.80721	2.8073	2.80938	2.80972	2.80226	2.80157	2.80574	2.81259	2.80651	2.81004	2.80944	2.80765	2.81064	2.81052	2.80691	2.80801	2.80605	2.80768	2.80879	2.80893	2.80625	2.80697	2.80952	2.80867	2.80577	2.8081	2.80266	2.79296	2.80326	2.80225	2.8018	2.80612	2.80524	2.80493	2.8011	2.81111	2.80303	2.80567	2.80334	2.80119	2.80615	2.80388	2.80387	2.80673
			DK	2.11514	2.16487	2.14279	2.16285	2.13616	2.11407	2.19405	2.17474	2.15972	2.20893	2.12757	2.25727	2.239	2.25182	2.19515	2.24594	2.27364	2.07276	2.26613	2.23362	2.2726	2.24981	2.22472	2.23807	2.07427	2.07342	2.23508	2.07285	2.08574	2.07389	2.06287	2.08622	2.08556	2.0862	2.1367	2.0873	2.07737	2.08731	2.10285	2.27411	2.11579	2.08159	2.13723	2.14326	2.09403	2.19741
			FI	2.16148	2.21132	2.18919	2.2093	2.18254	2.16039	2.24058	2.22122	2.20616	2.25547	2.17393	2.30393	2.28561	2.29847	2.24167	2.29257	2.32034	2.10989	2.31282	2.28023	2.3193	2.29645	2.27131	2.28469	2.1114	2.11055	2.2817	2.10998	2.13202	2.11102	2.12441	2.10082	2.13184	2.13247	2.18309	2.13357	2.12341	2.12938	2.14916	2.32082	2.16214	2.11457	2.18362	2.18966	2.14032	2.24394
			FR	2.18607	2.23604	2.21384	2.234	2.20717	2.18497	2.26536	2.24597	2.23086	2.28027	2.19855	2.32885	2.31049	2.32338	2.26643	2.31746	2.34531	2.15456	2.33777	2.30509	2.34425	2.32135	2.29616	2.30957	2.15607	2.15522	2.30657	2.15465	2.15779	2.15569	2.16893	2.17704	2.14584	2.1656	2.20774	2.16114	2.16484	2.17857	2.17374	2.34579	2.18674	2.17237	2.20826	2.21433	2.16492	2.26872
			DE	2.45137	2.50216	2.47957	2.50003	2.47276	2.45022	2.53195	2.51227	2.49687	2.54693	2.46405	2.5963	2.57766	2.59078	2.53291	2.58472	2.61306	2.41434	2.60541	2.57221	2.61196	2.5887	2.56317	2.57676	2.41585	2.415	2.57374	2.41443	2.42118	2.41546	2.42529	2.43354	2.42131	2.40195	2.4734	2.4229	2.42116	2.43496	2.43891	2.61356	2.45211	2.42882	2.47392	2.48011	2.4299	2.53529
			IT	2.65566	2.71953	2.65314	2.7174	2.65024	2.66487	2.70618	2.7298	2.71422	2.73635	2.64688	2.77118	2.75233	2.76562	2.70705	2.75946	2.78817	2.62396	2.78045	2.74684	2.78703	2.7635	2.73771	2.75145	2.62547	2.62462	2.74841	2.62405	2.67673	2.62509	2.68818	2.69654	2.67531	2.68468	2.61219	2.68013	2.68403	2.69787	2.65984	2.78869	2.64935	2.69177	2.64702	2.65323	2.67477	2.70951
			NL	2.29312	2.34342	2.32106	2.34135	2.31434	2.292	2.37293	2.35342	2.3382	2.38787	2.30568	2.43677	2.4183	2.43128	2.37396	2.4253	2.45335	2.25974	2.44577	2.41288	2.45227	2.42923	2.4039	2.41739	2.26125	2.26041	2.41438	2.25983	2.26323	2.26087	2.27284	2.281	2.26328	2.26936	2.31494	2.2484	2.26862	2.28249	2.28074	2.45384	2.29382	2.27631	2.31545	2.32157	2.27181	2.37628
			NO	1.85927	1.90819	1.8865	1.90627	1.88	1.85824	1.93692	1.91789	1.90316	1.95173	1.87149	1.99931	1.9813	1.9939	1.93813	1.98815	2.01538	1.81945	2.00798	1.97598	2.01438	1.99194	1.96719	1.98035	1.82096	1.82012	1.97739	1.81954	1.8302	1.82058	1.82601	1.83373	1.83004	1.83072	1.88048	1.83169	1.81146	1.83541	1.84709	2.01583	1.85985	1.82915	1.88101	1.88691	1.83842	1.9403
			PL	2.88872	2.94086	2.91762	2.93859	2.91059	2.88749	2.97143	2.95128	2.93539	2.98652	2.90174	3.03719	3.01811	3.0316	2.97221	3.02532	3.05445	2.84239	3.04664	3.01256	3.05328	3.02943	3.00333	3.01725	2.8439	2.84306	3.01418	2.84248	2.8582	2.84352	2.84975	2.85385	2.85805	2.85853	2.91135	2.85973	2.8493	2.82571	2.87606	3.055	2.88958	2.84905	2.91186	2.91826	2.86681	2.97474
			PT	2.56143	2.61348	2.58984	2.61133	2.58296	2.56033	2.64263	2.62366	2.60816	2.65849	2.57422	2.70739	2.68862	2.70185	2.64354	2.69573	2.7243	2.54575	2.7166	2.68315	2.72317	2.69975	2.67404	2.68774	2.54725	2.54641	2.6847	2.54584	2.56572	2.54687	2.57712	2.58544	2.56431	2.57365	2.58364	2.56911	2.57299	2.5868	2.53583	2.72481	2.56221	2.58069	2.58415	2.59041	2.56378	2.64597
			RU	2.55548	2.56027	2.52669	2.57397	2.5418	2.56464	2.50574	2.5403	2.57308	2.52808	2.54523	2.45208	2.43599	2.42095	2.4928	2.44574	2.4072	2.38486	2.39893	2.43958	2.4613	2.42586	2.44148	2.44162	2.38637	2.38553	2.43227	2.38495	2.57629	2.38599	2.58761	2.59587	2.57487	2.58418	2.54685	2.57967	2.58349	2.59728	2.55959	2.37285	2.54962	2.59114	2.53572	2.5424	2.57436	2.50687
			ES	2.43074	2.49279	2.4513	2.49074	2.4445	2.43887	2.50367	2.50292	2.48757	2.53361	2.43598	2.568	2.54937	2.56248	2.50463	2.55643	2.58475	2.41784	2.57711	2.54392	2.58365	2.5604	2.53488	2.54847	2.41935	2.4185	2.54545	2.41793	2.4505	2.41897	2.46182	2.47007	2.44909	2.4584	2.44475	2.45389	2.4577	2.47149	2.43382	2.58526	2.40773	2.46535	2.44565	2.45174	2.44858	2.50701
			SE	1.9374	1.98656	1.96475	1.98461	1.95822	1.93636	2.01541	1.9963	1.98149	2.03025	1.94969	2.07804	2.05995	2.07262	2.0166	2.06683	2.0942	1.89008	2.08676	2.05461	2.09319	2.07064	2.0458	2.05901	1.89159	1.89074	2.05604	1.89017	1.90826	1.8912	1.90078	1.89563	1.90808	1.90876	1.95871	1.90983	1.89977	1.90578	1.92519	2.09465	1.938	1.88198	1.95924	1.96518	1.91648	2.01878
			TR	2.62149	2.68526	2.60725	2.68315	2.61055	2.63072	2.66017	2.69552	2.67997	2.6903	2.61206	2.72505	2.70625	2.7195	2.66107	2.71336	2.742	2.59029	2.73429	2.70076	2.74087	2.71739	2.69164	2.70536	2.5918	2.59095	2.70232	2.59038	2.64255	2.59142	2.65398	2.66232	2.64113	2.65049	2.61239	2.64594	2.64984	2.66367	2.62569	2.74252	2.61562	2.65756	2.5778	2.60422	2.64059	2.6635
			UA	2.30417	2.3668	2.29077	2.36479	2.29345	2.31337	2.34263	2.37682	2.36164	2.37239	2.29489	2.40645	2.38798	2.40096	2.34366	2.39499	2.42303	2.26533	2.41545	2.38257	2.42195	2.39891	2.37359	2.38707	2.26684	2.26599	2.38406	2.26542	2.32485	2.26645	2.33608	2.34425	2.32344	2.33271	2.29521	2.32822	2.33198	2.34573	2.30831	2.42352	2.29833	2.33956	2.28113	2.25484	2.32295	2.34598
			GB	2.21307	2.26313	2.24089	2.26108	2.2342	2.21197	2.2925	2.27308	2.25794	2.30742	2.22557	2.35609	2.3377	2.35061	2.29357	2.34468	2.37258	2.18405	2.36503	2.33229	2.37152	2.34858	2.32335	2.33678	2.18556	2.18471	2.33378	2.18414	2.19372	2.18518	2.20489	2.21302	2.19237	2.20156	2.23478	2.19709	2.2008	2.21454	2.20072	2.37306	2.21374	2.20835	2.2353	2.24138	2.17361	2.29586
		Middle East	IR	2.58168	2.61054	2.55276	2.62429	2.56793	2.59088	2.54648	2.59048	2.62341	2.57634	2.57139	2.59432	2.57534	2.5885	2.52255	2.58264	2.61085	2.48965	2.60319	2.56988	2.61012	2.58641	2.56081	2.57445	2.49116	2.49032	2.57142	2.48974	2.60262	2.49078	2.61399	2.6223	2.6012	2.61053	2.57302	2.606	2.60986	2.62367	2.58584	2.61137	2.57582	2.61755	2.56184	2.56856	2.60067	2.47672
			IQ	2.95287	2.98243	2.92334	2.99639	2.93879	2.96222	2.91703	2.96198	2.99552	2.9473	2.94238	2.96572	2.94635	2.95983	2.89244	2.95379	2.98267	2.85929	2.97487	2.94081	2.98188	2.95767	2.93158	2.94549	2.8608	2.85995	2.94243	2.85938	2.97435	2.86042	2.98596	2.99446	2.97293	2.98237	2.94407	2.97777	2.98179	2.99568	2.95721	2.98322	2.94697	2.98964	2.93263	2.93955	2.97234	2.86757
			IL	2.29807	2.36062	2.2701	2.35861	2.28473	2.30721	2.32193	2.3655	2.35546	2.35169	2.28805	2.38573	2.36727	2.38024	2.32297	2.37427	2.40229	2.26146	2.39472	2.36185	2.40122	2.37819	2.35288	2.36636	2.26297	2.26213	2.36335	2.26156	2.31868	2.26259	2.32991	2.33808	2.31727	2.32654	2.28927	2.32206	2.32581	2.33956	2.30215	2.40278	2.29223	2.33339	2.27788	2.28447	2.31678	2.32528
			KW	2.50151	2.53022	2.47272	2.54392	2.48783	2.51068	2.46644	2.51024	2.54304	2.49621	2.49126	2.5141	2.49521	2.5083	2.44267	2.50248	2.53055	2.41062	2.52291	2.48976	2.52982	2.50623	2.48073	2.49431	2.41213	2.41129	2.49129	2.41072	2.52233	2.41175	2.53365	2.54191	2.52091	2.53023	2.49288	2.52571	2.52953	2.54333	2.50563	2.53105	2.49565	2.53719	2.48175	2.48843	2.5204	2.41898
			OM	2.3797	2.4082	2.3511	2.42184	2.36613	2.38882	2.34483	2.38834	2.42095	2.37447	2.36951	2.39241	2.37364	2.38663	2.32243	2.38087	2.40873	2.30105	2.40114	2.36821	2.40795	2.38458	2.35923	2.37273	2.30256	2.30171	2.36972	2.30114	2.40035	2.30218	2.41161	2.41981	2.39894	2.40822	2.37111	2.40373	2.4075	2.42127	2.38376	2.40922	2.37385	2.4151	2.36006	2.36669	2.39844	2.31957
			QA	2.35592	2.38437	2.32737	2.39798	2.34237	2.36503	2.3211	2.36453	2.3971	2.35071	2.34575	2.36843	2.34969	2.36266	2.29759	2.35691	2.38472	2.26944	2.37714	2.34427	2.38401	2.36061	2.3353	2.34878	2.27095	2.2701	2.34577	2.26953	2.37653	2.27057	2.38777	2.39595	2.37512	2.38439	2.34735	2.3799	2.38366	2.39742	2.35997	2.38521	2.35008	2.39125	2.33631	2.34292	2.37463	2.28214
			SA	2.53476	2.59815	2.50586	2.59607	2.52102	2.54395	2.53997	2.58412	2.5929	2.56998	2.52447	2.6045	2.5858	2.59897	2.5409	2.59288	2.62132	2.48987	2.61366	2.58034	2.62021	2.59688	2.57127	2.58491	2.49138	2.49054	2.58188	2.48996	2.55567	2.491	2.56704	2.57533	2.55426	2.56359	2.5261	2.55906	2.56291	2.57672	2.53891	2.62183	2.52889	2.57059	2.51492	2.52164	2.55373	2.5433
			AE	2.41169	2.44024	2.38305	2.45389	2.3981	2.42083	2.37677	2.42035	2.45301	2.40645	2.40149	2.42424	2.40543	2.41845	2.35318	2.41267	2.44058	2.32514	2.43298	2.40001	2.43987	2.4164	2.39101	2.40453	2.32665	2.3258	2.40151	2.32523	2.43238	2.32626	2.44366	2.45187	2.43097	2.44026	2.4031	2.43576	2.43954	2.45332	2.41577	2.44108	2.40585	2.44716	2.39203	2.39866	2.43047	2.33934
		North America	CA	2.18836	2.22387	2.21612	2.22195	2.20945	2.18602	2.2676	2.23379	2.21882	2.268	2.20084	2.33105	2.3127	2.32558	2.26868	2.31967	2.31769	2.13899	2.32307	2.30731	2.32715	2.32356	2.29838	2.31178	2.1405	2.13965	2.30878	2.13908	2.17959	2.14011	2.1851	2.1932	2.17827	2.18596	2.21001	2.18296	2.18034	2.19474	2.17656	2.3171	2.18903	2.18853	2.21054	2.2166	2.17521	2.27096
			MX	2.47737	2.50002	2.50555	2.49819	2.49875	2.47468	2.5457	2.50569	2.49502	2.53619	2.49005	2.57689	2.58546	2.57384	2.55885	2.58669	2.54643	2.38482	2.5519	2.58913	2.556	2.57688	2.58908	2.5939	2.38633	2.38549	2.58114	2.38491	2.47244	2.38595	2.47893	2.48717	2.47111	2.47976	2.49939	2.47582	2.47413	2.48859	2.46572	2.54586	2.47811	2.48245	2.4999	2.50609	2.46826	2.56123
			TT	2.41733	2.42851	2.44544	2.42731	2.43866	2.41374	2.47308	2.43316	2.42416	2.46361	2.42998	2.53536	2.54322	2.53231	2.49862	2.54514	2.50496	2.3493	2.51042	2.53778	2.51452	2.53535	2.52876	2.54232	2.35081	2.34997	2.5393	2.34939	2.41837	2.35043	2.42804	2.43626	2.41696	2.42625	2.43929	2.42175	2.42325	2.4377	2.40721	2.50438	2.41806	2.43155	2.43981	2.44597	2.41535	2.50098
			US	2.54746	2.5706	2.57575	2.56873	2.56892	2.54473	2.61777	2.5771	2.56556	2.60817	2.56019	2.64981	2.65843	2.64676	2.62926	2.65965	2.61924	2.45602	2.62474	2.66212	2.62885	2.64981	2.65963	2.66691	2.45753	2.45669	2.6541	2.45611	2.54251	2.45715	2.54902	2.5573	2.54118	2.54984	2.56957	2.54589	2.54422	2.55869	2.53576	2.61867	2.54821	2.55256	2.57008	2.57631	2.53831	2.63166
		South America	AR	2.50666	2.48071	2.53487	2.48775	2.52806	2.50276	2.50023	2.46974	2.48555	2.49072	2.51935	2.56398	2.57545	2.59047	2.55477	2.57538	2.58116	2.40204	2.58699	2.56948	2.54525	2.58067	2.56547	2.57867	2.40354	2.4027	2.57442	2.40213	2.51469	2.40316	2.52601	2.53427	2.51328	2.52259	2.5287	2.51807	2.52189	2.53568	2.4991	2.58989	2.5074	2.52954	2.52922	2.53542	2.51263	2.55899
			BO	2.25597	2.25227	2.25585	2.25594	2.25802	2.25836	2.25091	2.25021	2.25438	2.26124	2.25516	2.25868	2.25809	2.25629	2.25928	2.25916	2.25555	2.25665	2.25469	2.25632	2.25743	2.25758	2.2549	2.25562	2.25816	2.25732	2.25442	2.25674	2.2513	2.25778	2.25191	2.25089	2.25045	2.25476	2.25389	2.25357	2.24974	2.25975	2.25168	2.25432	2.25198	2.24983	2.25479	2.25253	2.25252	2.25538
			BR	2.34189	2.32062	2.36986	2.32556	2.36312	2.33802	2.34983	2.31508	2.32302	2.34048	2.35446	2.42728	2.42448	2.43935	2.40398	2.42441	2.46012	2.26118	2.45398	2.41854	2.42369	2.43543	2.41455	2.42765	2.26269	2.26185	2.42342	2.26127	2.34981	2.26231	2.36104	2.36922	2.3484	2.35767	2.36372	2.35318	2.35693	2.37069	2.33438	2.46199	2.34259	2.36452	2.36424	2.37037	2.34771	2.40813
			CL	2.6855	2.66859	2.80179	2.67738	2.70708	2.68398	2.76263	2.65665	2.67494	2.76986	2.69832	2.71161	2.73533	2.73874	2.77258	2.72766	2.72053	2.55607	2.73112	2.73769	2.69064	2.72857	2.73266	2.7454	2.55758	2.55673	2.74111	2.55616	2.68382	2.5572	2.69169	2.70003	2.68248	2.69175	2.70776	2.68721	2.68687	2.70138	2.67457	2.72408	2.68628	2.69527	2.70828	2.71455	2.67982	2.78674
			PE	2.37655	2.39095	2.52071	2.38964	2.3978	2.37509	2.48212	2.38578	2.38649	2.4894	2.38914	2.42936	2.44965	2.44499	2.49204	2.44565	2.41778	2.26859	2.42355	2.45272	2.4087	2.44118	2.4527	2.46217	2.2701	2.26925	2.45286	2.26868	2.37482	2.26971	2.38257	2.39075	2.37349	2.38268	2.39841	2.37819	2.3778	2.39223	2.36573	2.41886	2.37726	2.38606	2.39892	2.40506	2.37091	2.5059
			VE	2.59547	2.6068	2.62387	2.60555	2.617	2.59182	2.65184	2.61152	2.60238	2.64217	2.60825	2.71469	2.72264	2.71163	2.67756	2.72456	2.68401	2.52644	2.68953	2.71716	2.69364	2.71469	2.70806	2.72175	2.52795	2.5271	2.71871	2.52653	2.59657	2.52756	2.60633	2.61464	2.59515	2.60449	2.61767	2.59996	2.60152	2.61601	2.58529	2.68344	2.59625	2.60989	2.61819	2.62444	2.5935	2.67999
	Gray_Grid_NH3ship
		GHG [kgCO2e/kgNH3]	Destination	Africa											Asia-Pacific																Europe																		Middle East
		Origin		DZ	AO	EG	GQ	LY	MA	MZ	NA	NG	ZA	TN	AU	BN	CN	IN	ID	JP	KZ	KR	MY	PG	PH	SG	TH	TM	UZ	VN	AZ	BE	CZ	DK	FI	FR	DE	IT	NL	NO	PL	PT	RU	ES	SE	TR	UA	GB	IR
		Africa	DZ	2.61234	2.74827	2.68483	2.74175	2.6718	2.6512	2.78095	2.76814	2.73736	2.82297	2.65918	2.89612	2.8604	2.88758	2.77584	2.87304	2.93273	2.62581	2.9182	2.85156	2.92859	2.88228	2.83562	2.86096	2.62732	2.62648	2.85625	2.6259	2.67544	2.62694	2.69432	2.70931	2.67365	2.68644	2.6758	2.6796	2.6888	2.7053	2.64723	2.93502	2.64315	2.7019	2.67599	2.68792	2.67135	2.78336
			AO	2.2426	2.12977	2.28445	2.16353	2.27315	2.23513	2.2315	2.16785	2.163	2.21348	2.26161	2.34572	2.34159	2.36669	2.30869	2.34085	2.40381	2.13999	2.39186	2.33319	2.37292	2.3595	2.32771	2.34816	2.1415	2.14065	2.3421	2.14008	2.25725	2.14112	2.27383	2.28681	2.25557	2.2673	2.27616	2.26117	2.26873	2.28441	2.2339	2.40555	2.24551	2.28019	2.27648	2.28698	2.25383	2.31733
			EG	2.57919	2.68936	2.50909	2.68288	2.55582	2.59269	2.62173	2.69888	2.67849	2.66567	2.56307	2.7288	2.69574	2.72072	2.61762	2.7075	2.76237	2.52242	2.74888	2.68744	2.75869	2.71592	2.67259	2.69607	2.52393	2.52309	2.69162	2.52251	2.61679	2.52355	2.6356	2.65053	2.615	2.62776	2.56646	2.62094	2.63009	2.64656	2.5887	2.76439	2.57215	2.64314	2.54803	2.56012	2.61272	2.62429
			GQ	2.67621	2.58773	2.72601	2.54962	2.71216	2.66655	2.69134	2.61431	2.57584	2.66725	2.69897	2.82838	2.8235	2.85438	2.78328	2.82237	2.89965	2.56304	2.8853	2.81367	2.86171	2.84537	2.80732	2.83201	2.56455	2.56371	2.8249	2.56313	2.6944	2.56417	2.714	2.72962	2.69257	2.7057	2.71652	2.69863	2.70835	2.7251	2.66659	2.90202	2.68043	2.72196	2.71673	2.72965	2.6901	2.79461
			LY	2.85607	2.97777	2.8439	2.97027	2.79377	2.87072	2.94492	2.99978	2.96559	2.99333	2.83609	3.06522	3.02783	3.05638	2.93915	3.04101	3.10369	2.80902	3.08852	3.01865	3.09927	3.05077	3.00202	3.02853	2.81053	2.80968	3.02365	2.80911	2.89798	2.81015	2.91862	2.93516	2.89609	2.9097	2.84938	2.90232	2.91278	2.92991	2.867	3.10615	2.84875	2.92714	2.83974	2.85239	2.89337	2.94723
			MA	2.8792	2.97448	2.93094	2.96682	2.91647	2.83859	3.03684	2.99602	2.96242	3.05393	2.90288	3.16244	3.1233	3.1533	3.03041	3.13706	3.20291	2.85414	3.18705	3.11378	3.19819	3.14736	3.09642	3.12415	2.85565	2.85481	3.1191	2.85423	2.90206	2.85527	2.92244	2.93874	2.90018	2.91367	2.92116	2.90637	2.91664	2.93367	2.87161	3.20555	2.88374	2.93081	2.92134	2.93484	2.89753	3.03904
			MZ	2.44946	2.40931	2.40407	2.42873	2.42647	2.4628	2.29957	2.37962	2.42824	2.35304	2.43357	2.45768	2.44163	2.46383	2.39176	2.44231	2.50105	2.30874	2.48888	2.43401	2.48479	2.45966	2.42056	2.44167	2.31025	2.30941	2.43756	2.30883	2.48647	2.30987	2.50504	2.51977	2.48469	2.49734	2.43689	2.4906	2.49958	2.51597	2.45877	2.50273	2.44247	2.51246	2.41875	2.43062	2.48247	2.39979
			NA	2.23146	2.14203	2.26484	2.15937	2.2621	2.22393	2.17752	2.10403	2.15869	2.1605	2.25053	2.28791	2.28392	2.30803	2.25225	2.28324	2.34376	2.11254	2.33222	2.27576	2.31408	2.30116	2.27042	2.29016	2.11405	2.1132	2.28427	2.11263	2.24615	2.11367	2.26277	2.27579	2.24447	2.25621	2.26513	2.25007	2.25767	2.27337	2.2227	2.34538	2.2344	2.26916	2.26545	2.27599	2.24271	2.26044
			NG	2.62213	2.5392	2.67087	2.52794	2.65735	2.61292	2.64074	2.56507	2.50175	2.61729	2.64438	2.77542	2.77061	2.80089	2.73115	2.76953	2.84532	2.51387	2.83123	2.76094	2.80811	2.79208	2.75467	2.77893	2.51538	2.51453	2.77193	2.51396	2.63983	2.515	2.65903	2.6743	2.63802	2.65096	2.66154	2.64402	2.65345	2.67006	2.61262	2.84763	2.62617	2.66677	2.66176	2.67435	2.63565	2.74221
			ZA	3.51856	3.37998	3.45822	3.40547	3.4899	3.50469	3.32937	3.33963	3.4054	3.26056	3.50156	3.49969	3.48988	3.52712	3.43757	3.48832	3.58128	3.27867	3.56434	3.47848	3.53983	3.51611	3.46886	3.49909	3.28018	3.27933	3.49228	3.27876	3.54456	3.2798	3.57086	3.59236	3.54238	3.55861	3.50699	3.54948	3.56397	3.58311	3.50675	3.58435	3.516	3.58236	3.48012	3.49846	3.53832	3.45185
			TN	2.64956	2.7617	2.65842	2.75505	2.64348	2.66325	2.75293	2.78188	2.75061	2.79901	2.60271	2.86633	2.8312	2.8579	2.74803	2.84364	2.90227	2.61552	2.88797	2.82248	2.89823	2.8527	2.80677	2.8317	2.61703	2.61618	2.82705	2.61561	2.68791	2.61665	2.70703	2.72223	2.68609	2.699	2.65209	2.69209	2.70146	2.71805	2.65931	2.90451	2.64278	2.71474	2.65119	2.66291	2.68374	2.75537
		Asia-Pacific	AU	2.85742	2.83577	2.80247	2.85888	2.82913	2.87308	2.75248	2.79964	2.85864	2.77087	2.83833	2.57748	2.657	2.67258	2.73807	2.63983	2.68948	2.59317	2.68574	2.65756	2.63837	2.65425	2.65671	2.67511	2.59468	2.59384	2.66792	2.59326	2.9033	2.5943	2.92571	2.94382	2.90132	2.91575	2.84263	2.90782	2.91954	2.9373	2.86962	2.69982	2.84979	2.93517	2.82046	2.83531	2.89819	2.76667
			BN	2.76655	2.77506	2.71397	2.79771	2.73958	2.78162	2.68059	2.73971	2.79744	2.70868	2.74825	2.60475	2.5264	2.58649	2.652	2.58114	2.6177	2.54158	2.60601	2.56165	2.62568	2.57374	2.56981	2.57926	2.54309	2.54224	2.56803	2.54167	2.81021	2.54271	2.83166	2.84892	2.80828	2.82226	2.75231	2.81463	2.82566	2.84308	2.77802	2.6198	2.75907	2.8406	2.73115	2.74525	2.80537	2.6792
			CN	2.89773	2.91075	2.84211	2.93457	2.86907	2.91354	2.80709	2.87338	2.93438	2.8398	2.87842	2.71844	2.68371	2.62159	2.77638	2.69895	2.6937	2.63534	2.67978	2.68746	2.73852	2.66905	2.68962	2.69134	2.63684	2.636	2.67345	2.63543	2.94421	2.63646	2.96688	2.98522	2.94222	2.95677	2.88278	2.94876	2.96066	2.97851	2.91012	2.6937	2.89005	2.97648	2.86034	2.8754	2.93902	2.80536
			IN	3.04383	3.10218	2.98769	3.12677	3.0149	3.05976	2.97735	3.06345	3.12663	3.02461	3.02436	3.04289	3.00639	3.03374	2.86635	3.01953	3.07911	2.88267	3.06452	2.99751	3.07556	3.0284	2.98147	3.00697	2.88418	2.88333	3.00224	2.88276	3.09072	2.8838	3.11354	3.132	3.08872	3.10334	3.02877	3.09529	3.1073	3.1252	3.05636	3.08142	3.03612	3.12321	3.00611	3.02133	3.08549	2.93591
			ID	3.0097	3.00477	2.95228	3.02898	2.98005	3.02595	2.90436	2.96669	3.02882	2.93221	2.98979	2.80263	2.7953	2.81722	2.88468	2.73756	2.84449	2.75372	2.83964	2.79704	2.82914	2.79716	2.7957	2.8154	2.75523	2.75439	2.80801	2.75381	3.05784	2.75485	3.08122	3.10017	3.05581	3.07069	2.99434	3.06246	3.07487	3.09297	3.02263	2.85454	3.0019	3.09119	2.97114	2.98676	3.05244	2.91476
			JP	2.95606	2.96976	2.89844	2.99432	2.92629	2.97236	2.86234	2.9311	2.99418	2.89592	2.93608	2.74777	2.72817	2.70567	2.83025	2.73711	2.63318	2.64632	2.6752	2.73518	2.7588	2.71011	2.74083	2.74117	2.64783	2.64699	2.72568	2.64641	3.00442	2.64745	3.02791	3.04697	3.00239	3.01732	2.94065	3.00905	3.02154	3.03968	2.96906	2.68277	2.94825	3.03794	2.91736	2.93304	2.999	2.8604
			KZ	2.62909	2.6254	2.62898	2.62906	2.63115	2.63149	2.62403	2.62333	2.62751	2.63436	2.62828	2.63181	2.63121	2.62942	2.63241	2.63229	2.62868	2.61574	2.62782	2.62945	2.63055	2.6307	2.62802	2.62874	2.63129	2.63044	2.62754	2.62987	2.62443	2.6309	2.62503	2.62402	2.62357	2.62789	2.62701	2.6267	2.62287	2.63288	2.6248	2.62744	2.62511	2.62295	2.62791	2.62565	2.62564	2.6285
			KR	2.89496	2.90843	2.83879	2.93246	2.866	2.91091	2.80347	2.87068	2.93228	2.83666	2.87546	2.70073	2.67324	2.64927	2.77239	2.68937	2.63302	2.60378	2.59136	2.68078	2.71774	2.65662	2.6847	2.68481	2.60529	2.60445	2.6696	2.60387	2.94198	2.60491	2.96488	2.98343	2.93997	2.95463	2.87988	2.94655	2.95862	2.97656	2.90752	2.62734	2.88725	2.9746	2.85721	2.87244	2.93672	2.80169
			MY	2.66423	2.67131	2.61372	2.69321	2.63841	2.6788	2.58146	2.6373	2.69288	2.60795	2.64663	2.51695	2.47483	2.50216	2.55432	2.49508	2.53527	2.45369	2.52459	2.44001	2.54154	2.49284	2.4749	2.48752	2.4552	2.45436	2.47899	2.45378	2.70598	2.45482	2.72661	2.74314	2.7041	2.7177	2.65047	2.71032	2.72077	2.73789	2.67508	2.53782	2.65689	2.73512	2.63018	2.64364	2.70139	2.5803
[truncated: 637 more rows]
[truncated: 85 more columns]

## Sheet: Hydrogen Supply Chain
	Select below option
	Blue_Grid_NH3reconv	GHG [kgCO2e/kgH2]	Destination	Africa											Asia-Pacific																Europe																		Middle East
[truncated: 1,649 more rows]
[truncated: 85 more columns]
